# Supplementary material
Source: publisher site journal article supplement (https://www.spandidos-publications.com/63/downloadSupplementary)
Supplement: Supplementary file 1 [file downloadSupplementary]

## Sheet: 1h
Table SV. GO enrichment analysis of differentially expressed proteins prior to (0 h) and following (1-3 h) myocardial infarction.
GO-ID	Term	Category	#Diff	#Ref	%Diff	%Ref	Over/Under	P-Value	FDR	DiffSeqs
GO:0015671	oxygen transport	P	5	8	9.80392	1.15774	OVER	7.01741e-05	0.0564902	P60529, J9JHF7, P60524, F1PYZ1, J9JHZ3
GO:0015669	gas transport	P	5	8	9.80392	1.15774	OVER	7.01741e-05	0.0564902	P60529, J9JHF7, P60524, F1PYZ1, J9JHZ3
GO:0005833	hemoglobin complex	C	5	8	9.80392	1.15774	OVER	7.01741e-05	0.0564902	P60529, J9JHF7, P60524, F1PYZ1, J9JHZ3
GO:0019825	oxygen binding	F	5	8	9.80392	1.15774	OVER	7.01741e-05	0.0564902	P60529, J9JHF7, P60524, F1PYZ1, J9JHZ3
GO:0043234	protein complex	C	19	118	37.2549	17.0767	OVER	0.000204267	0.131548	C4MW55, P60529, J9NU17, J9JHF7, P60524, F1PTY1, E2RL75, E2REU6, F1Q0N9, F1PYZ1, F1P8G0, F1PH83, F1PBL4, F6X5M3, E2R489, F1PGS2, J9JHZ3, J9NWS3, Q0QEN2
GO:0060090	binding, bridging	F	3	3	5.88235	0.434153	OVER	0.000337432	0.155219	F1P8G0, F1PBL4, F1PGS2
GO:0030674	protein binding, bridging	F	3	3	5.88235	0.434153	OVER	0.000337432	0.155219	F1P8G0, F1PBL4, F1PGS2
GO:0045111	intermediate filament cytoskeleton	C	5	11	9.80392	1.5919	OVER	0.00049118	0.15816	F1PTY1, E2REU6, F1Q0N9, E2R489, J9NWS3
GO:0020037	heme binding	F	5	11	9.80392	1.5919	OVER	0.00049118	0.15816	P60529, J9JHF7, P60524, F1PYZ1, J9JHZ3
GO:0005882	intermediate filament	C	5	11	9.80392	1.5919	OVER	0.00049118	0.15816	F1PTY1, E2REU6, F1Q0N9, E2R489, J9NWS3
GO:0005198	structural molecule activity	F	7	23	13.7255	3.32851	OVER	0.000600866	0.17589	F1PTY1, E2REU6, F1Q0N9, F6X5M3, E2R489, F1PGS2, J9NWS3
GO:0046906	tetrapyrrole binding	F	5	12	9.80392	1.73661	OVER	0.000797168	0.197452	P60529, J9JHF7, P60524, F1PYZ1, J9JHZ3
GO:0005506	iron ion binding	F	5	12	9.80392	1.73661	OVER	0.000797168	0.197452	P60529, J9JHF7, P60524, F1PYZ1, J9JHZ3
GO:0046914	transition metal ion binding	F	10	48	19.6078	6.94645	OVER	0.00106444	0.231075	C4MW55, P60529, J9JHF7, P60524, J9NYN2, F1PYZ1, E2RH23, F1PP21, J9JHZ3, F1PBK6
GO:0044445	cytosolic part	C	5	13	9.80392	1.88133	OVER	0.00122643	0.231075	P60529, J9JHF7, P60524, F1PYZ1, J9JHZ3
GO:0070374	positive regulation of ERK1 and ERK2 cascade	P	3	4	5.88235	0.578871	OVER	0.00128204	0.231075	F1P8T3, J9NVE9, F1PGS2
GO:0070372	regulation of ERK1 and ERK2 cascade	P	3	4	5.88235	0.578871	OVER	0.00128204	0.231075	F1P8T3, J9NVE9, F1PGS2
GO:0032991	macromolecular complex	C	19	137	37.2549	19.8263	OVER	0.00129173	0.231075	C4MW55, P60529, J9NU17, J9JHF7, P60524, F1PTY1, E2RL75, E2REU6, F1Q0N9, F1PYZ1, F1P8G0, F1PH83, F1PBL4, F6X5M3, E2R489, F1PGS2, J9JHZ3, J9NWS3, Q0QEN2
GO:0070371	ERK1 and ERK2 cascade	P	3	5	5.88235	0.723589	OVER	0.00304475	0.490205	F1P8T3, J9NVE9, F1PGS2
GO:0005577	fibrinogen complex	C	3	5	5.88235	0.723589	OVER	0.00304475	0.490205	F1P8G0, F1PBL4, F1PGS2
GO:0005737	cytoplasm	C	18	137	35.2941	19.8263	OVER	0.00440065	0.674767	J9PB81, F1PPB6, P60529, J9NU17, J9JHF7, P60524, E2R7Z9, E2REU6, F1PYZ1, F1PH83, J9NU05, F6X5M3, Q9MZD3, F1PGS2, J9JHZ3, J9NWJ5, F1PBK6, Q0QEN2
GO:0009914	hormone transport	P	2	2	3.92157	0.289436	OVER	0.00494412	0.723639	E2R5U8, F1PGS2
GO:0043410	positive regulation of MAPK cascade	P	3	6	5.88235	0.868307	OVER	0.00578558	0.745182	F1P8T3, J9NVE9, F1PGS2
GO:0043408	regulation of MAPK cascade	P	3	6	5.88235	0.868307	OVER	0.00578558	0.745182	F1P8T3, J9NVE9, F1PGS2
GO:0030168	platelet activation	P	3	6	5.88235	0.868307	OVER	0.00578558	0.745182	F1P8G0, F1PBL4, F1PGS2
GO:0005829	cytosol	C	6	27	11.7647	3.90738	OVER	0.00878743	1	P60529, J9JHF7, P60524, E2R7Z9, F1PYZ1, J9JHZ3
GO:0051258	protein polymerization	P	3	7	5.88235	1.01302	OVER	0.00962068	1	F1P8G0, F1PBL4, F1PGS2
GO:0043623	cellular protein complex assembly	P	3	7	5.88235	1.01302	OVER	0.00962068	1	F1P8G0, F1PBL4, F1PGS2
GO:0034622	cellular macromolecular complex assembly	P	3	7	5.88235	1.01302	OVER	0.00962068	1	F1P8G0, F1PBL4, F1PGS2
GO:0051704	multi-organism process	P	5	20	9.80392	2.89436	OVER	0.0100829	1	J9PB81, Q9MZD3, F1PGS2, E2R357, F1PGC3
GO:0010817	regulation of hormone levels	P	2	3	3.92157	0.434153	OVER	0.0141575	1	E2R5U8, F1PGS2
GO:0006818	hydrogen transport	P	2	3	3.92157	0.434153	OVER	0.0141575	1	C4MW55, Q0QEN2
GO:0015992	proton transport	P	2	3	3.92157	0.434153	OVER	0.0141575	1	C4MW55, Q0QEN2
GO:1902533	positive regulation of intracellular signal transduction	P	3	8	5.88235	1.15774	OVER	0.0146287	1	F1P8T3, J9NVE9, F1PGS2
GO:0001934	positive regulation of protein phosphorylation	P	3	8	5.88235	1.15774	OVER	0.0146287	1	F1P8T3, J9NVE9, F1PGS2
GO:0023014	signal transduction by protein phosphorylation	P	3	8	5.88235	1.15774	OVER	0.0146287	1	F1P8T3, J9NVE9, F1PGS2
GO:0000165	MAPK cascade	P	3	8	5.88235	1.15774	OVER	0.0146287	1	F1P8T3, J9NVE9, F1PGS2
GO:0065007	biological regulation	P	13	297	25.4902	42.9812	UNDER	0.0156203	1	F1PDY8, E2R5U8, F1P8T3, F1P6H7, F1PTY1, F1PF31, F1P8G0, F1PP21, J9NVE9, F1PBL4, Q9MZD3, F1PGS2, J9NWJ5
GO:0006793	phosphorus metabolic process	P	9	58	17.6471	8.39363	OVER	0.0156839	1	C4MW55, F1P8T3, F1PPB6, E2R7Z9, E2R2C3, J9NVE9, J9NU05, F1PGS2, Q0QEN2
GO:0044464	cell part	C	30	308	58.8235	44.5731	OVER	0.0161618	1	J9PB81, C4MW55, F1PDY8, F1P8T3, F1PPB6, P60529, J9NU17, J9JHF7, P60524, E2R7Z9, F1PTY1, E2RL75, E2REU6, F1Q0N9, F1PYZ1, E2RH23, E2R2C3, F1P8G0, F1PH83, F1PBL4, J9NU05, F6X5M3, E2R489, Q9MZD3, F1PGS2, J9JHZ3, J9NWJ5, F1PBK6, J9NWS3, Q0QEN2
GO:0044424	intracellular part	C	25	242	49.0196	35.0217	OVER	0.018667	1	J9PB81, C4MW55, F1PPB6, P60529, J9NU17, J9JHF7, P60524, E2R7Z9, F1PTY1, E2RL75, E2REU6, F1Q0N9, F1PYZ1, E2RH23, F1PH83, J9NU05, F6X5M3, E2R489, Q9MZD3, F1PGS2, J9JHZ3, J9NWJ5, F1PBK6, J9NWS3, Q0QEN2
GO:0042327	positive regulation of phosphorylation	P	3	9	5.88235	1.30246	OVER	0.0208562	1	F1P8T3, J9NVE9, F1PGS2
GO:0050789	regulation of biological process	P	11	261	21.5686	37.7713	UNDER	0.0210583	1	F1PDY8, F1P8T3, F1P6H7, F1PF31, F1P8G0, F1PP21, J9NVE9, F1PBL4, Q9MZD3, F1PGS2, J9NWJ5
GO:0019693	ribose phosphate metabolic process	P	5	24	9.80392	3.47323	OVER	0.0222405	1	C4MW55, F1PPB6, E2R2C3, J9NU05, Q0QEN2
GO:0005623	cell	C	30	310	58.8235	44.8625	OVER	0.0233103	1	J9PB81, C4MW55, F1PDY8, F1P8T3, F1PPB6, P60529, J9NU17, J9JHF7, P60524, E2R7Z9, F1PTY1, E2RL75, E2REU6, F1Q0N9, F1PYZ1, E2RH23, E2R2C3, F1P8G0, F1PH83, F1PBL4, J9NU05, F6X5M3, E2R489, Q9MZD3, F1PGS2, J9JHZ3, J9NWJ5, F1PBK6, J9NWS3, Q0QEN2
GO:0009117	nucleotide metabolic process	P	5	25	9.80392	3.61795	OVER	0.026333	1	C4MW55, F1PPB6, E2R2C3, J9NU05, Q0QEN2
GO:0006753	nucleoside phosphate metabolic process	P	5	25	9.80392	3.61795	OVER	0.026333	1	C4MW55, F1PPB6, E2R2C3, J9NU05, Q0QEN2
GO:0015078	hydrogen ion transmembrane transporter activity	F	2	4	3.92157	0.578871	OVER	0.0270329	1	C4MW55, Q0QEN2
GO:0018193	peptidyl-amino acid modification	P	2	4	3.92157	0.578871	OVER	0.0270329	1	J9NVE9, Q9MZD3
GO:0001932	regulation of protein phosphorylation	P	3	10	5.88235	1.44718	OVER	0.0283228	1	F1P8T3, J9NVE9, F1PGS2
GO:0010562	positive regulation of phosphorus metabolic process	P	3	10	5.88235	1.44718	OVER	0.0283228	1	F1P8T3, J9NVE9, F1PGS2
GO:0045937	positive regulation of phosphate metabolic process	P	3	10	5.88235	1.44718	OVER	0.0283228	1	F1P8T3, J9NVE9, F1PGS2
GO:0005622	intracellular	C	25	250	49.0196	36.1795	OVER	0.0296271	1	J9PB81, C4MW55, F1PPB6, P60529, J9NU17, J9JHF7, P60524, E2R7Z9, F1PTY1, E2RL75, E2REU6, F1Q0N9, F1PYZ1, E2RH23, F1PH83, J9NU05, F6X5M3, E2R489, Q9MZD3, F1PGS2, J9JHZ3, J9NWJ5, F1PBK6, J9NWS3, Q0QEN2
GO:0055086	nucleobase-containing small molecule metabolic process	P	5	26	9.80392	3.76266	OVER	0.0308832	1	C4MW55, F1PPB6, E2R2C3, J9NU05, Q0QEN2
GO:0009199	ribonucleoside triphosphate metabolic process	P	4	18	7.84314	2.60492	OVER	0.0327104	1	C4MW55, E2R2C3, J9NU05, Q0QEN2
GO:0009167	purine ribonucleoside monophosphate metabolic process	P	4	18	7.84314	2.60492	OVER	0.0327104	1	C4MW55, E2R2C3, J9NU05, Q0QEN2
GO:0009161	ribonucleoside monophosphate metabolic process	P	4	18	7.84314	2.60492	OVER	0.0327104	1	C4MW55, E2R2C3, J9NU05, Q0QEN2
GO:0009144	purine nucleoside triphosphate metabolic process	P	4	18	7.84314	2.60492	OVER	0.0327104	1	C4MW55, E2R2C3, J9NU05, Q0QEN2
GO:0009141	nucleoside triphosphate metabolic process	P	4	18	7.84314	2.60492	OVER	0.0327104	1	C4MW55, E2R2C3, J9NU05, Q0QEN2
GO:0009126	purine nucleoside monophosphate metabolic process	P	4	18	7.84314	2.60492	OVER	0.0327104	1	C4MW55, E2R2C3, J9NU05, Q0QEN2
GO:0009123	nucleoside monophosphate metabolic process	P	4	18	7.84314	2.60492	OVER	0.0327104	1	C4MW55, E2R2C3, J9NU05, Q0QEN2
GO:0009119	ribonucleoside metabolic process	P	4	18	7.84314	2.60492	OVER	0.0327104	1	C4MW55, E2R2C3, J9NU05, Q0QEN2
GO:0009116	nucleoside metabolic process	P	4	18	7.84314	2.60492	OVER	0.0327104	1	C4MW55, E2R2C3, J9NU05, Q0QEN2
GO:1901657	glycosyl compound metabolic process	P	4	18	7.84314	2.60492	OVER	0.0327104	1	C4MW55, E2R2C3, J9NU05, Q0QEN2
GO:0046128	purine ribonucleoside metabolic process	P	4	18	7.84314	2.60492	OVER	0.0327104	1	C4MW55, E2R2C3, J9NU05, Q0QEN2
GO:0071822	protein complex subunit organization	P	4	18	7.84314	2.60492	OVER	0.0327104	1	F1P8G0, F1PBL4, F1PGS2, F1Q432
GO:0046034	ATP metabolic process	P	4	18	7.84314	2.60492	OVER	0.0327104	1	C4MW55, E2R2C3, J9NU05, Q0QEN2
GO:0042278	purine nucleoside metabolic process	P	4	18	7.84314	2.60492	OVER	0.0327104	1	C4MW55, E2R2C3, J9NU05, Q0QEN2
GO:0009205	purine ribonucleoside triphosphate metabolic process	P	4	18	7.84314	2.60492	OVER	0.0327104	1	C4MW55, E2R2C3, J9NU05, Q0QEN2
GO:0044430	cytoskeletal part	C	6	36	11.7647	5.20984	OVER	0.0352338	1	J9NU17, F1PTY1, E2REU6, F1Q0N9, E2R489, J9NWS3
GO:0051707	response to other organism	P	3	11	5.88235	1.5919	OVER	0.0370254	1	J9PB81, F1PGS2, F1PGC3
GO:0009607	response to biotic stimulus	P	3	11	5.88235	1.5919	OVER	0.0370254	1	J9PB81, F1PGS2, F1PGC3
GO:0042325	regulation of phosphorylation	P	3	11	5.88235	1.5919	OVER	0.0370254	1	F1P8T3, J9NVE9, F1PGS2
GO:0010647	positive regulation of cell communication	P	3	11	5.88235	1.5919	OVER	0.0370254	1	F1P8T3, J9NVE9, F1PGS2
GO:0023056	positive regulation of signaling	P	3	11	5.88235	1.5919	OVER	0.0370254	1	F1P8T3, J9NVE9, F1PGS2
GO:0043207	response to external biotic stimulus	P	3	11	5.88235	1.5919	OVER	0.0370254	1	J9PB81, F1PGS2, F1PGC3
GO:0009967	positive regulation of signal transduction	P	3	11	5.88235	1.5919	OVER	0.0370254	1	F1P8T3, J9NVE9, F1PGS2
GO:0001775	cell activation	P	3	11	5.88235	1.5919	OVER	0.0370254	1	F1P8G0, F1PBL4, F1PGS2
GO:0050896	response to stimulus	P	9	221	17.6471	31.9826	UNDER	0.0372917	1	J9PB81, F1PDY8, F1P8T3, E2R7Z9, F1P8G0, J9NVE9, F1PBL4, F1PGS2, F1PGC3
GO:0009150	purine ribonucleotide metabolic process	P	4	19	7.84314	2.74964	OVER	0.0393037	1	C4MW55, E2R2C3, J9NU05, Q0QEN2
GO:0006163	purine nucleotide metabolic process	P	4	19	7.84314	2.74964	OVER	0.0393037	1	C4MW55, E2R2C3, J9NU05, Q0QEN2
GO:0009259	ribonucleotide metabolic process	P	4	19	7.84314	2.74964	OVER	0.0393037	1	C4MW55, E2R2C3, J9NU05, Q0QEN2
GO:0016310	phosphorylation	P	6	37	11.7647	5.35456	OVER	0.0398064	1	C4MW55, F1P8T3, E2R2C3, J9NVE9, J9NU05, F1PGS2
GO:0002682	regulation of immune system process	P	0	48	0	6.94645	UNDER	0.0405411	1
GO:0098589	membrane region	C	2	5	3.92157	0.723589	OVER	0.043025	1	J9NU17, F6X5M3
GO:0015077	monovalent inorganic cation transmembrane transporter activity	F	2	5	3.92157	0.723589	OVER	0.043025	1	C4MW55, Q0QEN2
GO:0015672	monovalent inorganic cation transport	P	2	5	3.92157	0.723589	OVER	0.043025	1	C4MW55, Q0QEN2
GO:0044431	Golgi apparatus part	C	2	5	3.92157	0.723589	OVER	0.043025	1	F1PH83, F6X5M3
GO:0031401	positive regulation of protein modification process	P	3	12	5.88235	1.73661	OVER	0.0469422	1	F1P8T3, J9NVE9, F1PGS2
GO:1902531	regulation of intracellular signal transduction	P	3	12	5.88235	1.73661	OVER	0.0469422	1	F1P8T3, J9NVE9, F1PGS2
GO:0006796	phosphate-containing compound metabolic process	P	8	57	15.6863	8.24891	OVER	0.0523276	1	C4MW55, F1P8T3, F1PPB6, E2R2C3, J9NVE9, J9NU05, F1PGS2, Q0QEN2
GO:0006732	coenzyme metabolic process	P	4	21	7.84314	3.03907	OVER	0.0546268	1	F1PPB6, E2R7Z9, E2R2C3, J9NU05
GO:0005576	extracellular region	C	10	230	19.6078	33.2851	UNDER	0.0568706	1	E2R5U8, E2R7Z9, F1PTY1, F1P8G0, J9NVE9, F1PBL4, F1PGS2, F1Q432, F1PBK6, E2RKW4
GO:0045184	establishment of protein localization	P	3	13	5.88235	1.88133	OVER	0.0580359	1	F1PH83, F6X5M3, F1PGS2
GO:0015031	protein transport	P	3	13	5.88235	1.88133	OVER	0.0580359	1	F1PH83, F6X5M3, F1PGS2
GO:0019220	regulation of phosphate metabolic process	P	3	13	5.88235	1.88133	OVER	0.0580359	1	F1P8T3, J9NVE9, F1PGS2
GO:0045095	keratin filament	C	2	6	3.92157	0.868307	OVER	0.0616448	1	F1PTY1, E2R489
GO:0006886	intracellular protein transport	P	2	6	3.92157	0.868307	OVER	0.0616448	1	F1PH83, F6X5M3
GO:0071705	nitrogen compound transport	P	2	6	3.92157	0.868307	OVER	0.0616448	1	E2R5U8, F1PGS2
GO:0090066	regulation of anatomical structure size	P	2	6	3.92157	0.868307	OVER	0.0616448	1	F1P8T3, F1PGS2
GO:0072521	purine-containing compound metabolic process	P	4	22	7.84314	3.18379	OVER	0.0633526	1	C4MW55, E2R2C3, J9NU05, Q0QEN2
GO:0002684	positive regulation of immune system process	P	0	43	0	6.22287	UNDER	0.0639092	1
GO:0005509	calcium ion binding	F	0	45	0	6.5123	UNDER	0.0651653	1
GO:0019538	protein metabolic process	P	5	141	9.80392	20.4052	UNDER	0.0668611	1	J9PB81, F1P8T3, J9NVE9, Q9MZD3, F1PGS2
GO:0019637	organophosphate metabolic process	P	5	32	9.80392	4.63097	OVER	0.0683851	1	C4MW55, F1PPB6, E2R2C3, J9NU05, Q0QEN2
GO:0006461	protein complex assembly	P	3	14	5.88235	2.02605	OVER	0.0702567	1	F1P8G0, F1PBL4, F1PGS2
GO:0051174	regulation of phosphorus metabolic process	P	3	14	5.88235	2.02605	OVER	0.0702567	1	F1P8T3, J9NVE9, F1PGS2
GO:0070271	protein complex biogenesis	P	3	14	5.88235	2.02605	OVER	0.0702567	1	F1P8G0, F1PBL4, F1PGS2
GO:0031399	regulation of protein modification process	P	3	14	5.88235	2.02605	OVER	0.0702567	1	F1P8T3, J9NVE9, F1PGS2
GO:0004347	glucose-6-phosphate isomerase activity	F	1	1	1.96078	0.144718	OVER	0.0710059	1	E2R2C3
GO:0046949	fatty-acyl-CoA biosynthetic process	P	1	1	1.96078	0.144718	OVER	0.0710059	1	E2R7Z9
GO:0003206	cardiac chamber morphogenesis	P	1	1	1.96078	0.144718	OVER	0.0710059	1	F1PP21
GO:0003205	cardiac chamber development	P	1	1	1.96078	0.144718	OVER	0.0710059	1	F1PP21
GO:0042562	hormone binding	F	1	1	1.96078	0.144718	OVER	0.0710059	1	E2R5U8
GO:0015833	peptide transport	P	1	1	1.96078	0.144718	OVER	0.0710059	1	F1PGS2
GO:0070327	thyroid hormone transport	P	1	1	1.96078	0.144718	OVER	0.0710059	1	E2R5U8
GO:0002793	positive regulation of peptide secretion	P	1	1	1.96078	0.144718	OVER	0.0710059	1	F1PGS2
GO:0070324	thyroid hormone binding	F	1	1	1.96078	0.144718	OVER	0.0710059	1	E2R5U8
GO:0002791	regulation of peptide secretion	P	1	1	1.96078	0.144718	OVER	0.0710059	1	F1PGS2
GO:0002790	peptide secretion	P	1	1	1.96078	0.144718	OVER	0.0710059	1	F1PGS2
GO:0009166	nucleotide catabolic process	P	1	1	1.96078	0.144718	OVER	0.0710059	1	F1PPB6
GO:0012510	trans-Golgi network transport vesicle membrane	C	1	1	1.96078	0.144718	OVER	0.0710059	1	F6X5M3
GO:0048475	coated membrane	C	1	1	1.96078	0.144718	OVER	0.0710059	1	F6X5M3
GO:0016289	CoA hydrolase activity	F	1	1	1.96078	0.144718	OVER	0.0710059	1	E2R7Z9
GO:0050714	positive regulation of protein secretion	P	1	1	1.96078	0.144718	OVER	0.0710059	1	F1PGS2
GO:0044057	regulation of system process	P	1	1	1.96078	0.144718	OVER	0.0710059	1	F1PGS2
GO:0035338	long-chain fatty-acyl-CoA biosynthetic process	P	1	1	1.96078	0.144718	OVER	0.0710059	1	E2R7Z9
GO:0035337	fatty-acyl-CoA metabolic process	P	1	1	1.96078	0.144718	OVER	0.0710059	1	E2R7Z9
GO:0035336	long-chain fatty-acyl-CoA metabolic process	P	1	1	1.96078	0.144718	OVER	0.0710059	1	E2R7Z9
GO:0046887	positive regulation of hormone secretion	P	1	1	1.96078	0.144718	OVER	0.0710059	1	F1PGS2
GO:0046883	regulation of hormone secretion	P	1	1	1.96078	0.144718	OVER	0.0710059	1	F1PGS2
GO:0046879	hormone secretion	P	1	1	1.96078	0.144718	OVER	0.0710059	1	F1PGS2
GO:0033138	positive regulation of peptidyl-serine phosphorylation	P	1	1	1.96078	0.144718	OVER	0.0710059	1	J9NVE9
GO:0033135	regulation of peptidyl-serine phosphorylation	P	1	1	1.96078	0.144718	OVER	0.0710059	1	J9NVE9
GO:0032039	integrator complex	C	1	1	1.96078	0.144718	OVER	0.0710059	1	E2RL75
GO:0016874	ligase activity	F	1	1	1.96078	0.144718	OVER	0.0710059	1	F1PEH9
GO:0016859	cis-trans isomerase activity	F	1	1	1.96078	0.144718	OVER	0.0710059	1	Q9MZD3
GO:0005985	sucrose metabolic process	P	1	1	1.96078	0.144718	OVER	0.0710059	1	E2R2C3
GO:0005982	starch metabolic process	P	1	1	1.96078	0.144718	OVER	0.0710059	1	E2R2C3
GO:0003755	peptidyl-prolyl cis-trans isomerase activity	F	1	1	1.96078	0.144718	OVER	0.0710059	1	Q9MZD3
GO:0005905	coated pit	C	1	1	1.96078	0.144718	OVER	0.0710059	1	F6X5M3
GO:0005903	brush border	C	1	1	1.96078	0.144718	OVER	0.0710059	1	J9NU17
GO:0005902	microvillus	C	1	1	1.96078	0.144718	OVER	0.0710059	1	J9NU17
GO:0016180	snRNA processing	P	1	1	1.96078	0.144718	OVER	0.0710059	1	E2RL75
GO:0000413	protein peptidyl-prolyl isomerization	P	1	1	1.96078	0.144718	OVER	0.0710059	1	Q9MZD3
GO:0045069	regulation of viral genome replication	P	1	1	1.96078	0.144718	OVER	0.0710059	1	Q9MZD3
GO:0015036	disulfide oxidoreductase activity	F	1	1	1.96078	0.144718	OVER	0.0710059	1	J9NWJ5
GO:0015035	protein disulfide oxidoreductase activity	F	1	1	1.96078	0.144718	OVER	0.0710059	1	J9NWJ5
GO:0015002	heme-copper terminal oxidase activity	F	1	1	1.96078	0.144718	OVER	0.0710059	1	C4MW55
GO:0016790	thiolester hydrolase activity	F	1	1	1.96078	0.144718	OVER	0.0710059	1	E2R7Z9
GO:0034116	positive regulation of heterotypic cell-cell adhesion	P	1	1	1.96078	0.144718	OVER	0.0710059	1	F1PGS2
GO:0034114	regulation of heterotypic cell-cell adhesion	P	1	1	1.96078	0.144718	OVER	0.0710059	1	F1PGS2
GO:0034113	heterotypic cell-cell adhesion	P	1	1	1.96078	0.144718	OVER	0.0710059	1	F1PGS2
GO:0004139	deoxyribose-phosphate aldolase activity	F	1	1	1.96078	0.144718	OVER	0.0710059	1	F1PPB6
GO:0004129	cytochrome-c oxidase activity	F	1	1	1.96078	0.144718	OVER	0.0710059	1	C4MW55
GO:0051047	positive regulation of secretion	P	1	1	1.96078	0.144718	OVER	0.0710059	1	F1PGS2
GO:0003018	vascular process in circulatory system	P	1	1	1.96078	0.144718	OVER	0.0710059	1	F1PGS2
GO:0003007	heart morphogenesis	P	1	1	1.96078	0.144718	OVER	0.0710059	1	F1PP21
GO:0072337	modified amino acid transport	P	1	1	1.96078	0.144718	OVER	0.0710059	1	E2R5U8
GO:0018904	ether metabolic process	P	1	1	1.96078	0.144718	OVER	0.0710059	1	J9NWJ5
GO:1902042	negative regulation of extrinsic apoptotic signaling pathway via death domain receptors	P	1	1	1.96078	0.144718	OVER	0.0710059	1	F1PGS2
GO:0042310	vasoconstriction	P	1	1	1.96078	0.144718	OVER	0.0710059	1	F1PGS2
GO:0048232	male gamete generation	P	1	1	1.96078	0.144718	OVER	0.0710059	1	E2R357
GO:0016073	snRNA metabolic process	P	1	1	1.96078	0.144718	OVER	0.0710059	1	E2RL75
GO:0017157	regulation of exocytosis	P	1	1	1.96078	0.144718	OVER	0.0710059	1	F1PGS2
GO:0010739	positive regulation of protein kinase A signaling	P	1	1	1.96078	0.144718	OVER	0.0710059	1	J9NVE9
GO:0010738	regulation of protein kinase A signaling	P	1	1	1.96078	0.144718	OVER	0.0710059	1	J9NVE9
GO:0010737	protein kinase A signaling	P	1	1	1.96078	0.144718	OVER	0.0710059	1	J9NVE9
GO:0018208	peptidyl-proline modification	P	1	1	1.96078	0.144718	OVER	0.0710059	1	Q9MZD3
GO:0017119	Golgi transport complex	C	1	1	1.96078	0.144718	OVER	0.0710059	1	F1PH83
GO:0035150	regulation of tube size	P	1	1	1.96078	0.144718	OVER	0.0710059	1	F1PGS2
GO:0004089	carbonate dehydratase activity	F	1	1	1.96078	0.144718	OVER	0.0710059	1	F1PBK6
GO:0016676	oxidoreductase activity, acting on a heme group of donors, oxygen as acceptor	F	1	1	1.96078	0.144718	OVER	0.0710059	1	C4MW55
GO:0016675	oxidoreductase activity, acting on a heme group of donors	F	1	1	1.96078	0.144718	OVER	0.0710059	1	C4MW55
GO:0070069	cytochrome complex	C	1	1	1.96078	0.144718	OVER	0.0710059	1	C4MW55
GO:0005798	Golgi-associated vesicle	C	1	1	1.96078	0.144718	OVER	0.0710059	1	F6X5M3
GO:0090277	positive regulation of peptide hormone secretion	P	1	1	1.96078	0.144718	OVER	0.0710059	1	F1PGS2
GO:0090276	regulation of peptide hormone secretion	P	1	1	1.96078	0.144718	OVER	0.0710059	1	F1PGS2
GO:0019229	regulation of vasoconstriction	P	1	1	1.96078	0.144718	OVER	0.0710059	1	F1PGS2
GO:0007283	spermatogenesis	P	1	1	1.96078	0.144718	OVER	0.0710059	1	E2R357
GO:0006123	mitochondrial electron transport, cytochrome c to oxygen	P	1	1	1.96078	0.144718	OVER	0.0710059	1	C4MW55
GO:0023061	signal release	P	1	1	1.96078	0.144718	OVER	0.0710059	1	F1PGS2
GO:0047617	acyl-CoA hydrolase activity	F	1	1	1.96078	0.144718	OVER	0.0710059	1	E2R7Z9
GO:2000352	negative regulation of endothelial cell apoptotic process	P	1	1	1.96078	0.144718	OVER	0.0710059	1	F1PGS2
GO:1904036	negative regulation of epithelial cell apoptotic process	P	1	1	1.96078	0.144718	OVER	0.0710059	1	F1PGS2
GO:0006730	one-carbon metabolic process	P	1	1	1.96078	0.144718	OVER	0.0710059	1	F1PBK6
GO:0030140	trans-Golgi network transport vesicle	C	1	1	1.96078	0.144718	OVER	0.0710059	1	F6X5M3
GO:0030136	clathrin-coated vesicle	C	1	1	1.96078	0.144718	OVER	0.0710059	1	F6X5M3
GO:0030135	coated vesicle	C	1	1	1.96078	0.144718	OVER	0.0710059	1	F6X5M3
GO:0030133	transport vesicle	C	1	1	1.96078	0.144718	OVER	0.0710059	1	F6X5M3
GO:0030132	clathrin coat of coated pit	C	1	1	1.96078	0.144718	OVER	0.0710059	1	F6X5M3
GO:0030130	clathrin coat of trans-Golgi network vesicle	C	1	1	1.96078	0.144718	OVER	0.0710059	1	F6X5M3
GO:0030125	clathrin vesicle coat	C	1	1	1.96078	0.144718	OVER	0.0710059	1	F6X5M3
GO:0030120	vesicle coat	C	1	1	1.96078	0.144718	OVER	0.0710059	1	F6X5M3
GO:0030118	clathrin coat	C	1	1	1.96078	0.144718	OVER	0.0710059	1	F6X5M3
GO:0030117	membrane coat	C	1	1	1.96078	0.144718	OVER	0.0710059	1	F6X5M3
GO:0000139	Golgi membrane	C	1	1	1.96078	0.144718	OVER	0.0710059	1	F6X5M3
GO:1903532	positive regulation of secretion by cell	P	1	1	1.96078	0.144718	OVER	0.0710059	1	F1PGS2
GO:1903524	positive regulation of blood circulation	P	1	1	1.96078	0.144718	OVER	0.0710059	1	F1PGS2
GO:1903522	regulation of blood circulation	P	1	1	1.96078	0.144718	OVER	0.0710059	1	F1PGS2
GO:0098803	respiratory chain complex	C	1	1	1.96078	0.144718	OVER	0.0710059	1	C4MW55
GO:0043152	induction of bacterial agglutination	P	1	1	1.96078	0.144718	OVER	0.0710059	1	F1PGS2
GO:0090087	regulation of peptide transport	P	1	1	1.96078	0.144718	OVER	0.0710059	1	F1PGS2
GO:0006662	glycerol ether metabolic process	P	1	1	1.96078	0.144718	OVER	0.0710059	1	J9NWJ5
GO:0030072	peptide hormone secretion	P	1	1	1.96078	0.144718	OVER	0.0710059	1	F1PGS2
GO:0019079	viral genome replication	P	1	1	1.96078	0.144718	OVER	0.0710059	1	Q9MZD3
GO:1901292	nucleoside phosphate catabolic process	P	1	1	1.96078	0.144718	OVER	0.0710059	1	F1PPB6
GO:0070469	respiratory chain	C	1	1	1.96078	0.144718	OVER	0.0710059	1	C4MW55
GO:0045921	positive regulation of exocytosis	P	1	1	1.96078	0.144718	OVER	0.0710059	1	F1PGS2
GO:0045907	positive regulation of vasoconstriction	P	1	1	1.96078	0.144718	OVER	0.0710059	1	F1PGS2
GO:0009264	deoxyribonucleotide catabolic process	P	1	1	1.96078	0.144718	OVER	0.0710059	1	F1PPB6
GO:0009262	deoxyribonucleotide metabolic process	P	1	1	1.96078	0.144718	OVER	0.0710059	1	F1PPB6
GO:0030665	clathrin-coated vesicle membrane	C	1	1	1.96078	0.144718	OVER	0.0710059	1	F6X5M3
GO:0030662	coated vesicle membrane	C	1	1	1.96078	0.144718	OVER	0.0710059	1	F6X5M3
GO:0030660	Golgi-associated vesicle membrane	C	1	1	1.96078	0.144718	OVER	0.0710059	1	F6X5M3
GO:0050880	regulation of blood vessel size	P	1	1	1.96078	0.144718	OVER	0.0710059	1	F1PGS2
GO:0030658	transport vesicle membrane	C	1	1	1.96078	0.144718	OVER	0.0710059	1	F6X5M3
GO:0045277	respiratory chain complex IV	C	1	1	1.96078	0.144718	OVER	0.0710059	1	C4MW55
GO:0016323	basolateral plasma membrane	C	1	1	1.96078	0.144718	OVER	0.0710059	1	J9NU17
GO:0035457	cellular response to interferon-alpha	P	1	1	1.96078	0.144718	OVER	0.0710059	1	F1PGC3
GO:0035455	response to interferon-alpha	P	1	1	1.96078	0.144718	OVER	0.0710059	1	F1PGC3
GO:0051186	cofactor metabolic process	P	4	23	7.84314	3.32851	OVER	0.0727765	1	F1PPB6, E2R7Z9, E2R2C3, J9NU05
GO:0051641	cellular localization	P	4	23	7.84314	3.32851	OVER	0.0727765	1	J9NU17, F1PH83, F6X5M3, F1PGS2
GO:0044281	small molecule metabolic process	P	8	63	15.6863	9.11722	OVER	0.0746172	1	C4MW55, E2R5U8, F1PPB6, E2R2C3, J9NU05, J9NWJ5, F1PBK6, Q0QEN2
GO:0016829	lyase activity	F	2	7	3.92157	1.01302	OVER	0.0824544	1	F1PPB6, F1PBK6
GO:0044444	cytoplasmic part	C	11	96	21.5686	13.8929	OVER	0.0848712	1	P60529, J9NU17, J9JHF7, P60524, E2R7Z9, F1PYZ1, F1PH83, F6X5M3, F1PGS2, J9JHZ3, Q0QEN2
GO:0005102	receptor binding	F	4	25	7.84314	3.61795	OVER	0.0936552	1	F1P8T3, F1P8G0, F1PBL4, F1PGS2
GO:0044421	extracellular region part	C	8	186	15.6863	26.9175	UNDER	0.0937127	1	E2R5U8, E2R7Z9, F1PTY1, F1P8G0, F1PBL4, F1PGS2, F1Q432, F1PBK6
GO:1901135	carbohydrate derivative metabolic process	P	5	35	9.80392	5.06512	OVER	0.0938386	1	C4MW55, F1PPB6, E2R2C3, J9NU05, Q0QEN2
GO:0065003	macromolecular complex assembly	P	3	16	5.88235	2.31548	OVER	0.0978342	1	F1P8G0, F1PBL4, F1PGS2
GO:0032270	positive regulation of cellular protein metabolic process	P	3	16	5.88235	2.31548	OVER	0.0978342	1	F1P8T3, J9NVE9, F1PGS2
GO:0050776	regulation of immune response	P	0	37	0	5.35456	UNDER	0.10041	1
GO:0030234	enzyme regulator activity	F	0	36	0	5.20984	UNDER	0.100751	1
GO:0016740	transferase activity	F	0	39	0	5.64399	UNDER	0.101894	1
GO:0044702	single organism reproductive process	P	2	8	3.92157	1.15774	OVER	0.105063	1	J9NVT1, E2R357
GO:0022414	reproductive process	P	2	8	3.92157	1.15774	OVER	0.105063	1	J9NVT1, E2R357
GO:0098772	molecular function regulator	F	0	41	0	5.93343	UNDER	0.10614	1
GO:0070011	peptidase activity, acting on L-amino acid peptides	F	1	58	1.96078	8.39363	UNDER	0.111027	1	J9PB81
GO:0008233	peptidase activity	F	1	61	1.96078	8.82779	UNDER	0.112169	1	J9PB81
GO:0005856	cytoskeleton	C	6	43	11.7647	6.22287	OVER	0.113003	1	J9NU17, F1PTY1, E2REU6, F1Q0N9, E2R489, J9NWS3
GO:0051247	positive regulation of protein metabolic process	P	3	17	5.88235	2.4602	OVER	0.113051	1	F1P8T3, J9NVE9, F1PGS2
GO:0051649	establishment of localization in cell	P	3	17	5.88235	2.4602	OVER	0.113051	1	F1PH83, F6X5M3, F1PGS2
GO:0051240	positive regulation of multicellular organismal process	P	3	18	5.88235	2.60492	OVER	0.129119	1	F1P8T3, F1PP21, F1PGS2
GO:0051156	glucose 6-phosphate metabolic process	P	2	9	3.92157	1.30246	OVER	0.129122	1	F1PPB6, E2R2C3
GO:0016853	isomerase activity	F	2	9	3.92157	1.30246	OVER	0.129122	1	E2R2C3, Q9MZD3
GO:0016023	cytoplasmic membrane-bounded vesicle	C	2	9	3.92157	1.30246	OVER	0.129122	1	F6X5M3, F1PGS2
GO:0006739	NADP metabolic process	P	2	9	3.92157	1.30246	OVER	0.129122	1	F1PPB6, E2R2C3
GO:0006098	pentose-phosphate shunt	P	2	9	3.92157	1.30246	OVER	0.129122	1	F1PPB6, E2R2C3
GO:0044446	intracellular organelle part	C	10	92	19.6078	13.314	OVER	0.12972	1	J9NU17, F1PTY1, E2RL75, E2REU6, F1Q0N9, F1PH83, F6X5M3, E2R489, J9NWS3, Q0QEN2
GO:0005615	extracellular space	C	3	96	5.88235	13.8929	UNDER	0.131553	1	F1P8G0, F1PBL4, F1PGS2
GO:0043170	macromolecule metabolic process	P	9	193	17.6471	27.9305	UNDER	0.136836	1	J9PB81, F1P8T3, F1P6H7, E2RL75, E2R2C3, F1PP21, J9NVE9, Q9MZD3, F1PGS2
GO:0034308	primary alcohol metabolic process	P	1	2	1.96078	0.289436	OVER	0.137068	1	E2R5U8
GO:0072577	endothelial cell apoptotic process	P	1	2	1.96078	0.289436	OVER	0.137068	1	F1PGS2
GO:0044769	ATPase activity, coupled to transmembrane movement of ions, rotational mechanism	F	1	2	1.96078	0.289436	OVER	0.137068	1	Q0QEN2
GO:0046933	proton-transporting ATP synthase activity, rotational mechanism	F	1	2	1.96078	0.289436	OVER	0.137068	1	Q0QEN2
GO:0042572	retinol metabolic process	P	1	2	1.96078	0.289436	OVER	0.137068	1	E2R5U8
GO:0051222	positive regulation of protein transport	P	1	2	1.96078	0.289436	OVER	0.137068	1	F1PGS2
GO:0072522	purine-containing compound biosynthetic process	P	1	2	1.96078	0.289436	OVER	0.137068	1	Q0QEN2
GO:0009168	purine ribonucleoside monophosphate biosynthetic process	P	1	2	1.96078	0.289436	OVER	0.137068	1	Q0QEN2
GO:0009163	nucleoside biosynthetic process	P	1	2	1.96078	0.289436	OVER	0.137068	1	Q0QEN2
GO:0009156	ribonucleoside monophosphate biosynthetic process	P	1	2	1.96078	0.289436	OVER	0.137068	1	Q0QEN2
GO:0009152	purine ribonucleotide biosynthetic process	P	1	2	1.96078	0.289436	OVER	0.137068	1	Q0QEN2
GO:0009145	purine nucleoside triphosphate biosynthetic process	P	1	2	1.96078	0.289436	OVER	0.137068	1	Q0QEN2
GO:0009142	nucleoside triphosphate biosynthetic process	P	1	2	1.96078	0.289436	OVER	0.137068	1	Q0QEN2
GO:0050772	positive regulation of axonogenesis	P	1	2	1.96078	0.289436	OVER	0.137068	1	F1P8T3
GO:0050770	regulation of axonogenesis	P	1	2	1.96078	0.289436	OVER	0.137068	1	F1P8T3
GO:0009127	purine nucleoside monophosphate biosynthetic process	P	1	2	1.96078	0.289436	OVER	0.137068	1	Q0QEN2
GO:0009124	nucleoside monophosphate biosynthetic process	P	1	2	1.96078	0.289436	OVER	0.137068	1	Q0QEN2
GO:0009108	coenzyme biosynthetic process	P	1	2	1.96078	0.289436	OVER	0.137068	1	E2R7Z9
GO:0030516	regulation of axon extension	P	1	2	1.96078	0.289436	OVER	0.137068	1	F1P8T3
GO:0045165	cell fate commitment	P	1	2	1.96078	0.289436	OVER	0.137068	1	F1PP21
GO:0050708	regulation of protein secretion	P	1	2	1.96078	0.289436	OVER	0.137068	1	F1PGS2
GO:0022904	respiratory electron transport chain	P	1	2	1.96078	0.289436	OVER	0.137068	1	C4MW55
GO:0022900	electron transport chain	P	1	2	1.96078	0.289436	OVER	0.137068	1	C4MW55
GO:0035384	thioester biosynthetic process	P	1	2	1.96078	0.289436	OVER	0.137068	1	E2R7Z9
GO:0035383	thioester metabolic process	P	1	2	1.96078	0.289436	OVER	0.137068	1	E2R7Z9
GO:1903900	regulation of viral life cycle	P	1	2	1.96078	0.289436	OVER	0.137068	1	Q9MZD3
GO:0033178	proton-transporting two-sector ATPase complex, catalytic domain	C	1	2	1.96078	0.289436	OVER	0.137068	1	Q0QEN2
GO:0008625	extrinsic apoptotic signaling pathway via death domain receptors	P	1	2	1.96078	0.289436	OVER	0.137068	1	F1PGS2
GO:0051188	cofactor biosynthetic process	P	1	2	1.96078	0.289436	OVER	0.137068	1	E2R7Z9
GO:0007507	heart development	P	1	2	1.96078	0.289436	OVER	0.137068	1	F1PP21
GO:0045773	positive regulation of axon extension	P	1	2	1.96078	0.289436	OVER	0.137068	1	F1P8T3
GO:0016832	aldehyde-lyase activity	F	1	2	1.96078	0.289436	OVER	0.137068	1	F1PPB6
GO:0016830	carbon-carbon lyase activity	F	1	2	1.96078	0.289436	OVER	0.137068	1	F1PPB6
GO:0042455	ribonucleoside biosynthetic process	P	1	2	1.96078	0.289436	OVER	0.137068	1	Q0QEN2
GO:0042451	purine nucleoside biosynthetic process	P	1	2	1.96078	0.289436	OVER	0.137068	1	Q0QEN2
GO:0005984	disaccharide metabolic process	P	1	2	1.96078	0.289436	OVER	0.137068	1	E2R2C3
GO:0042445	hormone metabolic process	P	1	2	1.96078	0.289436	OVER	0.137068	1	E2R5U8
GO:0009055	electron carrier activity	F	1	2	1.96078	0.289436	OVER	0.137068	1	C4MW55
GO:1901659	glycosyl compound biosynthetic process	P	1	2	1.96078	0.289436	OVER	0.137068	1	Q0QEN2
GO:0046129	purine ribonucleoside biosynthetic process	P	1	2	1.96078	0.289436	OVER	0.137068	1	Q0QEN2
GO:0009615	response to virus	P	1	2	1.96078	0.289436	OVER	0.137068	1	F1PGC3
GO:0051087	chaperone binding	F	1	2	1.96078	0.289436	OVER	0.137068	1	F1PGS2
GO:0072378	blood coagulation, fibrin clot formation	P	1	2	1.96078	0.289436	OVER	0.137068	1	F1PGS2
GO:0051046	regulation of secretion	P	1	2	1.96078	0.289436	OVER	0.137068	1	F1PGS2
GO:0046700	heterocycle catabolic process	P	1	2	1.96078	0.289436	OVER	0.137068	1	F1PPB6
GO:1902041	regulation of extrinsic apoptotic signaling pathway via death domain receptors	P	1	2	1.96078	0.289436	OVER	0.137068	1	F1PGS2
GO:0034754	cellular hormone metabolic process	P	1	2	1.96078	0.289436	OVER	0.137068	1	E2R5U8
GO:0051648	vesicle localization	P	1	2	1.96078	0.289436	OVER	0.137068	1	J9NU17
GO:0051640	organelle localization	P	1	2	1.96078	0.289436	OVER	0.137068	1	J9NU17
GO:0032504	multicellular organism reproduction	P	1	2	1.96078	0.289436	OVER	0.137068	1	E2R357
GO:1902600	hydrogen ion transmembrane transport	P	1	2	1.96078	0.289436	OVER	0.137068	1	Q0QEN2
GO:0018209	peptidyl-serine modification	P	1	2	1.96078	0.289436	OVER	0.137068	1	J9NVE9
GO:0061387	regulation of extent of cell growth	P	1	2	1.96078	0.289436	OVER	0.137068	1	F1P8T3
GO:0034655	nucleobase-containing compound catabolic process	P	1	2	1.96078	0.289436	OVER	0.137068	1	F1PPB6
GO:0051592	response to calcium ion	P	1	2	1.96078	0.289436	OVER	0.137068	1	F1PGS2
GO:0042886	amide transport	P	1	2	1.96078	0.289436	OVER	0.137068	1	F1PGS2
GO:0008361	regulation of cell size	P	1	2	1.96078	0.289436	OVER	0.137068	1	F1P8T3
GO:0007276	gamete generation	P	1	2	1.96078	0.289436	OVER	0.137068	1	E2R357
GO:0018105	peptidyl-serine phosphorylation	P	1	2	1.96078	0.289436	OVER	0.137068	1	J9NVE9
GO:0031941	filamentous actin	C	1	2	1.96078	0.289436	OVER	0.137068	1	J9NU17
GO:0006164	purine nucleotide biosynthetic process	P	1	2	1.96078	0.289436	OVER	0.137068	1	Q0QEN2
GO:0007229	integrin-mediated signaling pathway	P	1	2	1.96078	0.289436	OVER	0.137068	1	F1P8T3
GO:0016591	DNA-directed RNA polymerase II, holoenzyme	C	1	2	1.96078	0.289436	OVER	0.137068	1	E2RL75
GO:0006118	obsolete electron transport	P	1	2	1.96078	0.289436	OVER	0.137068	1	J9NWJ5
GO:2000351	regulation of endothelial cell apoptotic process	P	1	2	1.96078	0.289436	OVER	0.137068	1	F1PGS2
GO:0006754	ATP biosynthetic process	P	1	2	1.96078	0.289436	OVER	0.137068	1	Q0QEN2
GO:0030199	collagen fibril organization	P	1	2	1.96078	0.289436	OVER	0.137068	1	F1Q432
GO:0097191	extrinsic apoptotic signaling pathway	P	1	2	1.96078	0.289436	OVER	0.137068	1	F1PGS2
GO:0042775	mitochondrial ATP synthesis coupled electron transport	P	1	2	1.96078	0.289436	OVER	0.137068	1	C4MW55
GO:0042773	ATP synthesis coupled electron transport	P	1	2	1.96078	0.289436	OVER	0.137068	1	C4MW55
GO:1901361	organic cyclic compound catabolic process	P	1	2	1.96078	0.289436	OVER	0.137068	1	F1PPB6
GO:1903530	regulation of secretion by cell	P	1	2	1.96078	0.289436	OVER	0.137068	1	F1PGS2
GO:0071616	acyl-CoA biosynthetic process	P	1	2	1.96078	0.289436	OVER	0.137068	1	E2R7Z9
GO:0070527	platelet aggregation	P	1	2	1.96078	0.289436	OVER	0.137068	1	F1PGS2
GO:0050996	positive regulation of lipid catabolic process	P	1	2	1.96078	0.289436	OVER	0.137068	1	J9NVE9
GO:0050994	regulation of lipid catabolic process	P	1	2	1.96078	0.289436	OVER	0.137068	1	J9NVE9
GO:0009311	oligosaccharide metabolic process	P	1	2	1.96078	0.289436	OVER	0.137068	1	E2R2C3
GO:0048675	axon extension	P	1	2	1.96078	0.289436	OVER	0.137068	1	F1P8T3
GO:0009306	protein secretion	P	1	2	1.96078	0.289436	OVER	0.137068	1	F1PGS2
GO:0044270	cellular nitrogen compound catabolic process	P	1	2	1.96078	0.289436	OVER	0.137068	1	F1PPB6
GO:0019731	antibacterial humoral response	P	1	2	1.96078	0.289436	OVER	0.137068	1	F1PGS2
GO:0019730	antimicrobial humoral response	P	1	2	1.96078	0.289436	OVER	0.137068	1	F1PGS2
GO:0016469	proton-transporting two-sector ATPase complex	C	1	2	1.96078	0.289436	OVER	0.137068	1	Q0QEN2
GO:0048609	multicellular organismal reproductive process	P	1	2	1.96078	0.289436	OVER	0.137068	1	E2R357
GO:0006637	acyl-CoA metabolic process	P	1	2	1.96078	0.289436	OVER	0.137068	1	E2R7Z9
GO:0015991	ATP hydrolysis coupled proton transport	P	1	2	1.96078	0.289436	OVER	0.137068	1	Q0QEN2
GO:0015988	energy coupled proton transmembrane transport, against electrochemical gradient	P	1	2	1.96078	0.289436	OVER	0.137068	1	Q0QEN2
GO:0015986	ATP synthesis coupled proton transport	P	1	2	1.96078	0.289436	OVER	0.137068	1	Q0QEN2
GO:0015985	energy coupled proton transport, down electrochemical gradient	P	1	2	1.96078	0.289436	OVER	0.137068	1	Q0QEN2
GO:0022409	positive regulation of cell-cell adhesion	P	1	2	1.96078	0.289436	OVER	0.137068	1	F1PGS2
GO:0009260	ribonucleotide biosynthetic process	P	1	2	1.96078	0.289436	OVER	0.137068	1	Q0QEN2
GO:0046390	ribose phosphate biosynthetic process	P	1	2	1.96078	0.289436	OVER	0.137068	1	Q0QEN2
GO:0009206	purine ribonucleoside triphosphate biosynthetic process	P	1	2	1.96078	0.289436	OVER	0.137068	1	Q0QEN2
GO:0009201	ribonucleoside triphosphate biosynthetic process	P	1	2	1.96078	0.289436	OVER	0.137068	1	Q0QEN2
GO:0045259	proton-transporting ATP synthase complex	C	1	2	1.96078	0.289436	OVER	0.137068	1	Q0QEN2
GO:0016328	lateral plasma membrane	C	1	2	1.96078	0.289436	OVER	0.137068	1	J9NU17
GO:2001237	negative regulation of extrinsic apoptotic signaling pathway	P	1	2	1.96078	0.289436	OVER	0.137068	1	F1PGS2
GO:2001236	regulation of extrinsic apoptotic signaling pathway	P	1	2	1.96078	0.289436	OVER	0.137068	1	F1PGS2
GO:2001234	negative regulation of apoptotic signaling pathway	P	1	2	1.96078	0.289436	OVER	0.137068	1	F1PGS2
GO:0031091	platelet alpha granule	C	1	2	1.96078	0.289436	OVER	0.137068	1	F1PGS2
GO:0006810	transport	P	11	102	21.5686	14.7612	OVER	0.140072	1	C4MW55, E2R5U8, P60529, J9JHF7, P60524, F1PYZ1, F1PH83, F6X5M3, F1PGS2, J9JHZ3, Q0QEN2
GO:0051234	establishment of localization	P	11	103	21.5686	14.9059	OVER	0.142669	1	C4MW55, E2R5U8, P60529, J9JHF7, P60524, F1PYZ1, F1PH83, F6X5M3, F1PGS2, J9JHZ3, Q0QEN2
GO:0043933	macromolecular complex subunit organization	P	4	29	7.84314	4.19682	OVER	0.14288	1	F1P8G0, F1PBL4, F1PGS2, F1Q432
GO:0046496	nicotinamide nucleotide metabolic process	P	3	19	5.88235	2.74964	OVER	0.14596	1	F1PPB6, E2R2C3, J9NU05
GO:0050794	regulation of cellular process	P	11	220	21.5686	31.8379	UNDER	0.153087	1	F1PDY8, F1P8T3, F1P6H7, F1PF31, F1P8G0, F1PP21, J9NVE9, F1PBL4, Q9MZD3, F1PGS2, J9NWJ5
GO:0031410	cytoplasmic vesicle	C	2	10	3.92157	1.44718	OVER	0.154322	1	F6X5M3, F1PGS2
GO:0019682	glyceraldehyde-3-phosphate metabolic process	P	2	10	3.92157	1.44718	OVER	0.154322	1	F1PPB6, E2R2C3
GO:0008270	zinc ion binding	F	4	30	7.84314	4.34153	OVER	0.15657	1	J9NYN2, E2RH23, F1PP21, F1PBK6
GO:0060089	molecular transducer activity	F	0	31	0	4.48625	UNDER	0.157458	1
GO:0044765	single-organism transport	P	9	80	17.6471	11.5774	OVER	0.159055	1	C4MW55, E2R5U8, P60529, J9JHF7, P60524, F1PYZ1, F1PGS2, J9JHZ3, Q0QEN2
GO:0002253	activation of immune response	P	0	34	0	4.92041	UNDER	0.161408	1
GO:0072524	pyridine-containing compound metabolic process	P	3	20	5.88235	2.89436	OVER	0.163492	1	F1PPB6, E2R2C3, J9NU05
GO:0006468	protein phosphorylation	P	3	20	5.88235	2.89436	OVER	0.163492	1	F1P8T3, J9NVE9, F1PGS2
GO:0019362	pyridine nucleotide metabolic process	P	3	20	5.88235	2.89436	OVER	0.163492	1	F1PPB6, E2R2C3, J9NU05
GO:0006733	oxidoreduction coenzyme metabolic process	P	3	20	5.88235	2.89436	OVER	0.163492	1	F1PPB6, E2R2C3, J9NU05
GO:0009059	macromolecule biosynthetic process	P	1	52	1.96078	7.52533	UNDER	0.164387	1	J9NVE9
GO:0050778	positive regulation of immune response	P	0	35	0	5.06512	UNDER	0.164659	1
GO:1902578	single-organism localization	P	9	83	17.6471	12.0116	OVER	0.16919	1	C4MW55, E2R5U8, P60529, J9JHF7, P60524, F1PYZ1, F1PGS2, J9JHZ3, Q0QEN2
GO:0016787	hydrolase activity	F	5	124	9.80392	17.945	UNDER	0.17593	1	J9PB81, J9NU17, E2R7Z9, F1PBK6, Q0QEN2
GO:0051179	localization	P	13	129	25.4902	18.6686	OVER	0.179743	1	C4MW55, E2R5U8, F1P8T3, P60529, J9NU17, J9JHF7, P60524, F1PYZ1, F1PH83, F6X5M3, F1PGS2, J9JHZ3, Q0QEN2
GO:0022890	inorganic cation transmembrane transporter activity	F	2	11	3.92157	1.5919	OVER	0.180388	1	C4MW55, Q0QEN2
GO:0070727	cellular macromolecule localization	P	2	11	3.92157	1.5919	OVER	0.180388	1	F1PH83, F6X5M3
GO:0005794	Golgi apparatus	C	2	11	3.92157	1.5919	OVER	0.180388	1	F1PH83, F6X5M3
GO:0034613	cellular protein localization	P	2	11	3.92157	1.5919	OVER	0.180388	1	F1PH83, F6X5M3
GO:0008324	cation transmembrane transporter activity	F	2	11	3.92157	1.5919	OVER	0.180388	1	C4MW55, Q0QEN2
GO:0006790	sulfur compound metabolic process	P	2	11	3.92157	1.5919	OVER	0.180388	1	E2R7Z9, J9NU05
GO:0098796	membrane protein complex	C	3	21	5.88235	3.03907	OVER	0.181636	1	C4MW55, F6X5M3, Q0QEN2
GO:0008104	protein localization	P	3	21	5.88235	3.03907	OVER	0.181636	1	F1PH83, F6X5M3, F1PGS2
GO:0044422	organelle part	C	10	94	19.6078	13.6035	OVER	0.190027	1	J9NU17, F1PTY1, E2RL75, E2REU6, F1Q0N9, F1PH83, F6X5M3, E2R489, J9NWS3, Q0QEN2
GO:0006534	cysteine metabolic process	P	1	3	1.96078	0.434153	OVER	0.198523	1	J9NU05
GO:0051223	regulation of protein transport	P	1	3	1.96078	0.434153	OVER	0.198523	1	F1PGS2
GO:0044703	multi-organism reproductive process	P	1	3	1.96078	0.434153	OVER	0.198523	1	E2R357
GO:0060560	developmental growth involved in morphogenesis	P	1	3	1.96078	0.434153	OVER	0.198523	1	F1P8T3
GO:1901136	carbohydrate derivative catabolic process	P	1	3	1.96078	0.434153	OVER	0.198523	1	F1PPB6
GO:0009165	nucleotide biosynthetic process	P	1	3	1.96078	0.434153	OVER	0.198523	1	Q0QEN2
GO:0050792	regulation of viral process	P	1	3	1.96078	0.434153	OVER	0.198523	1	Q9MZD3
GO:0001649	osteoblast differentiation	P	1	3	1.96078	0.434153	OVER	0.198523	1	F1P8T3
GO:0010976	positive regulation of neuron projection development	P	1	3	1.96078	0.434153	OVER	0.198523	1	F1P8T3
GO:0006457	protein folding	P	1	3	1.96078	0.434153	OVER	0.198523	1	Q9MZD3
GO:0045785	positive regulation of cell adhesion	P	1	3	1.96078	0.434153	OVER	0.198523	1	F1PGS2
GO:0016861	intramolecular oxidoreductase activity, interconverting aldoses and ketoses	F	1	3	1.96078	0.434153	OVER	0.198523	1	E2R2C3
GO:0016860	intramolecular oxidoreductase activity	F	1	3	1.96078	0.434153	OVER	0.198523	1	E2R2C3
GO:0070201	regulation of establishment of protein localization	P	1	3	1.96078	0.434153	OVER	0.198523	1	F1PGS2
GO:0005938	cell cortex	C	1	3	1.96078	0.434153	OVER	0.198523	1	J9NU17
GO:0001523	retinoid metabolic process	P	1	3	1.96078	0.434153	OVER	0.198523	1	E2R5U8
GO:0000428	DNA-directed RNA polymerase complex	C	1	3	1.96078	0.434153	OVER	0.198523	1	E2RL75
GO:0019439	aromatic compound catabolic process	P	1	3	1.96078	0.434153	OVER	0.198523	1	F1PPB6
GO:0016101	diterpenoid metabolic process	P	1	3	1.96078	0.434153	OVER	0.198523	1	E2R5U8
GO:0045666	positive regulation of neuron differentiation	P	1	3	1.96078	0.434153	OVER	0.198523	1	F1P8T3
GO:0005884	actin filament	C	1	3	1.96078	0.434153	OVER	0.198523	1	J9NU17
GO:0006953	acute-phase response	P	1	3	1.96078	0.434153	OVER	0.198523	1	J9NVE9
GO:0030307	positive regulation of cell growth	P	1	3	1.96078	0.434153	OVER	0.198523	1	F1P8T3
GO:0010770	positive regulation of cell morphogenesis involved in differentiation	P	1	3	1.96078	0.434153	OVER	0.198523	1	F1P8T3
GO:0004064	arylesterase activity	F	1	3	1.96078	0.434153	OVER	0.198523	1	F1PBK6
GO:0019953	sexual reproduction	P	1	3	1.96078	0.434153	OVER	0.198523	1	E2R357
GO:0016667	oxidoreductase activity, acting on a sulfur group of donors	F	1	3	1.96078	0.434153	OVER	0.198523	1	J9NWJ5
GO:0044448	cell cortex part	C	1	3	1.96078	0.434153	OVER	0.198523	1	J9NU17
GO:0010038	response to metal ion	P	1	3	1.96078	0.434153	OVER	0.198523	1	F1PGS2
GO:0097285	cell-type specific apoptotic process	P	1	3	1.96078	0.434153	OVER	0.198523	1	F1PGS2
GO:0030880	RNA polymerase complex	C	1	3	1.96078	0.434153	OVER	0.198523	1	E2RL75
GO:0030864	cortical actin cytoskeleton	C	1	3	1.96078	0.434153	OVER	0.198523	1	J9NU17
GO:0030863	cortical cytoskeleton	C	1	3	1.96078	0.434153	OVER	0.198523	1	J9NU17
GO:0006119	oxidative phosphorylation	P	1	3	1.96078	0.434153	OVER	0.198523	1	C4MW55
GO:1904035	regulation of epithelial cell apoptotic process	P	1	3	1.96078	0.434153	OVER	0.198523	1	F1PGS2
GO:1904019	epithelial cell apoptotic process	P	1	3	1.96078	0.434153	OVER	0.198523	1	F1PGS2
GO:0006721	terpenoid metabolic process	P	1	3	1.96078	0.434153	OVER	0.198523	1	E2R5U8
GO:0006720	isoprenoid metabolic process	P	1	3	1.96078	0.434153	OVER	0.198523	1	E2R5U8
GO:0048639	positive regulation of developmental growth	P	1	3	1.96078	0.434153	OVER	0.198523	1	F1P8T3
GO:0048638	regulation of developmental growth	P	1	3	1.96078	0.434153	OVER	0.198523	1	F1P8T3
GO:0044272	sulfur compound biosynthetic process	P	1	3	1.96078	0.434153	OVER	0.198523	1	E2R7Z9
GO:0004459	L-lactate dehydrogenase activity	F	1	3	1.96078	0.434153	OVER	0.198523	1	J9NU05
GO:0004457	lactate dehydrogenase activity	F	1	3	1.96078	0.434153	OVER	0.198523	1	J9NU05
GO:1901293	nucleoside phosphate biosynthetic process	P	1	3	1.96078	0.434153	OVER	0.198523	1	Q0QEN2
GO:1990138	neuron projection extension	P	1	3	1.96078	0.434153	OVER	0.198523	1	F1P8T3
GO:0045927	positive regulation of growth	P	1	3	1.96078	0.434153	OVER	0.198523	1	F1P8T3
GO:0019058	viral life cycle	P	1	3	1.96078	0.434153	OVER	0.198523	1	Q9MZD3
GO:0048588	developmental cell growth	P	1	3	1.96078	0.434153	OVER	0.198523	1	F1P8T3
GO:0055029	nuclear DNA-directed RNA polymerase complex	C	1	3	1.96078	0.434153	OVER	0.198523	1	E2RL75
GO:0009897	external side of plasma membrane	C	1	3	1.96078	0.434153	OVER	0.198523	1	F1PGS2
GO:0046907	intracellular transport	P	2	12	3.92157	1.73661	OVER	0.207077	1	F1PH83, F6X5M3
GO:0044238	primary metabolic process	P	13	242	25.4902	35.0217	UNDER	0.213999	1	J9PB81, C4MW55, E2R5U8, F1P8T3, F1PPB6, E2RL75, E2R2C3, F1PP21, J9NVE9, J9NU05, Q9MZD3, F1PGS2, Q0QEN2
GO:0006508	proteolysis	P	2	71	3.92157	10.275	UNDER	0.217139	1	J9PB81, F1PGS2
GO:0007596	blood coagulation	P	3	23	5.88235	3.32851	OVER	0.219443	1	F1P8G0, F1PBL4, F1PGS2
GO:0006091	generation of precursor metabolites and energy	P	3	23	5.88235	3.32851	OVER	0.219443	1	C4MW55, E2R2C3, J9NU05
GO:0035556	intracellular signal transduction	P	3	23	5.88235	3.32851	OVER	0.219443	1	F1P8T3, J9NVE9, F1PGS2
GO:0050817	coagulation	P	3	23	5.88235	3.32851	OVER	0.219443	1	F1P8G0, F1PBL4, F1PGS2
GO:0015075	ion transmembrane transporter activity	F	2	13	3.92157	1.88133	OVER	0.234175	1	C4MW55, Q0QEN2
GO:0030182	neuron differentiation	P	2	13	3.92157	1.88133	OVER	0.234175	1	F1P8T3, F1PP21
GO:0006081	cellular aldehyde metabolic process	P	2	13	3.92157	1.88133	OVER	0.234175	1	F1PPB6, E2R2C3
GO:0098805	whole membrane	C	2	13	3.92157	1.88133	OVER	0.234175	1	J9NU17, F6X5M3
GO:0002376	immune system process	P	5	121	9.80392	17.5109	UNDER	0.238791	1	J9PB81, F1P8T3, J9P0D4, J9P9B9, F1PGS2
GO:0007599	hemostasis	P	3	24	5.88235	3.47323	OVER	0.238952	1	F1P8G0, F1PBL4, F1PGS2
GO:0009966	regulation of signal transduction	P	3	24	5.88235	3.47323	OVER	0.238952	1	F1P8T3, J9NVE9, F1PGS2
GO:0004175	endopeptidase activity	F	1	49	1.96078	7.09117	UNDER	0.243271	1	J9PB81
GO:0016021	integral component of membrane	C	1	49	1.96078	7.09117	UNDER	0.243271	1	C4MW55
GO:0034645	cellular macromolecule biosynthetic process	P	1	49	1.96078	7.09117	UNDER	0.243271	1	J9NVE9
GO:0030414	peptidase inhibitor activity	F	0	25	0	3.61795	UNDER	0.246839	1
GO:1902589	single-organism organelle organization	P	0	25	0	3.61795	UNDER	0.246839	1
GO:0004857	enzyme inhibitor activity	F	0	27	0	3.90738	UNDER	0.248508	1
GO:0061134	peptidase regulator activity	F	0	27	0	3.90738	UNDER	0.248508	1
GO:0031224	intrinsic component of membrane	C	1	51	1.96078	7.38061	UNDER	0.248643	1	C4MW55
GO:0004872	receptor activity	F	0	28	0	4.0521	UNDER	0.251403	1
GO:0006897	endocytosis	P	0	28	0	4.0521	UNDER	0.251403	1
GO:0048583	regulation of response to stimulus	P	3	83	5.88235	12.0116	UNDER	0.253859	1	F1P8T3, J9NVE9, F1PGS2
GO:0065009	regulation of molecular function	P	0	29	0	4.19682	UNDER	0.255558	1
GO:0007605	sensory perception of sound	P	1	4	1.96078	0.578871	OVER	0.255686	1	J9NU17
GO:0044764	multi-organism cellular process	P	1	4	1.96078	0.578871	OVER	0.255686	1	Q9MZD3
GO:0012506	vesicle membrane	C	1	4	1.96078	0.578871	OVER	0.255686	1	F6X5M3
GO:0031639	plasminogen activation	P	1	4	1.96078	0.578871	OVER	0.255686	1	F1PGS2
GO:0031638	zymogen activation	P	1	4	1.96078	0.578871	OVER	0.255686	1	F1PGS2
GO:0008015	blood circulation	P	1	4	1.96078	0.578871	OVER	0.255686	1	F1PGS2
GO:0044042	glucan metabolic process	P	1	4	1.96078	0.578871	OVER	0.255686	1	E2R2C3
GO:0016836	hydro-lyase activity	F	1	4	1.96078	0.578871	OVER	0.255686	1	F1PBK6
GO:0016835	carbon-oxygen lyase activity	F	1	4	1.96078	0.578871	OVER	0.255686	1	F1PBK6
GO:0016820	hydrolase activity, acting on acid anhydrides, catalyzing transmembrane movement of substances	F	1	4	1.96078	0.578871	OVER	0.255686	1	Q0QEN2
GO:0005976	polysaccharide metabolic process	P	1	4	1.96078	0.578871	OVER	0.255686	1	E2R2C3
GO:0090407	organophosphate biosynthetic process	P	1	4	1.96078	0.578871	OVER	0.255686	1	Q0QEN2
GO:0098590	plasma membrane region	C	1	4	1.96078	0.578871	OVER	0.255686	1	J9NU17
GO:0098552	side of membrane	C	1	4	1.96078	0.578871	OVER	0.255686	1	F1PGS2
GO:0098542	defense response to other organism	P	1	4	1.96078	0.578871	OVER	0.255686	1	F1PGS2
GO:0007409	axonogenesis	P	1	4	1.96078	0.578871	OVER	0.255686	1	F1P8T3
GO:0003013	circulatory system process	P	1	4	1.96078	0.578871	OVER	0.255686	1	F1PGS2
GO:0032535	regulation of cellular component size	P	1	4	1.96078	0.578871	OVER	0.255686	1	F1P8T3
GO:0002526	acute inflammatory response	P	1	4	1.96078	0.578871	OVER	0.255686	1	J9NVE9
GO:0010769	regulation of cell morphogenesis involved in differentiation	P	1	4	1.96078	0.578871	OVER	0.255686	1	F1P8T3
GO:0016032	viral process	P	1	4	1.96078	0.578871	OVER	0.255686	1	Q9MZD3
GO:0006887	exocytosis	P	1	4	1.96078	0.578871	OVER	0.255686	1	F1PGS2
GO:0044429	mitochondrial part	C	1	4	1.96078	0.578871	OVER	0.255686	1	Q0QEN2
GO:0010035	response to inorganic substance	P	1	4	1.96078	0.578871	OVER	0.255686	1	F1PGS2
GO:0043903	regulation of symbiosis, encompassing mutualism through parasitism	P	1	4	1.96078	0.578871	OVER	0.255686	1	Q9MZD3
GO:0043900	regulation of multi-organism process	P	1	4	1.96078	0.578871	OVER	0.255686	1	Q9MZD3
GO:0019829	cation-transporting ATPase activity	F	1	4	1.96078	0.578871	OVER	0.255686	1	Q0QEN2
GO:0015405	P-P-bond-hydrolysis-driven transmembrane transporter activity	F	1	4	1.96078	0.578871	OVER	0.255686	1	Q0QEN2
GO:0030141	secretory granule	C	1	4	1.96078	0.578871	OVER	0.255686	1	F1PGS2
GO:0097190	apoptotic signaling pathway	P	1	4	1.96078	0.578871	OVER	0.255686	1	F1PGS2
GO:0042742	defense response to bacterium	P	1	4	1.96078	0.578871	OVER	0.255686	1	F1PGS2
GO:0006073	cellular glucan metabolic process	P	1	4	1.96078	0.578871	OVER	0.255686	1	E2R2C3
GO:0050954	sensory perception of mechanical stimulus	P	1	4	1.96078	0.578871	OVER	0.255686	1	J9NU17
GO:0015399	primary active transmembrane transporter activity	F	1	4	1.96078	0.578871	OVER	0.255686	1	Q0QEN2
GO:0044264	cellular polysaccharide metabolic process	P	1	4	1.96078	0.578871	OVER	0.255686	1	E2R2C3
GO:0000096	sulfur amino acid metabolic process	P	1	4	1.96078	0.578871	OVER	0.255686	1	J9NU05
GO:0000003	reproduction	P	1	4	1.96078	0.578871	OVER	0.255686	1	E2R357
GO:0022407	regulation of cell-cell adhesion	P	1	4	1.96078	0.578871	OVER	0.255686	1	F1PGS2
GO:0042626	ATPase activity, coupled to transmembrane movement of substances	F	1	4	1.96078	0.578871	OVER	0.255686	1	Q0QEN2
GO:0042625	ATPase activity, coupled to transmembrane movement of ions	F	1	4	1.96078	0.578871	OVER	0.255686	1	Q0QEN2
GO:0030659	cytoplasmic vesicle membrane	C	1	4	1.96078	0.578871	OVER	0.255686	1	F6X5M3
GO:0060627	regulation of vesicle-mediated transport	P	1	4	1.96078	0.578871	OVER	0.255686	1	F1PGS2
GO:0048589	developmental growth	P	1	4	1.96078	0.578871	OVER	0.255686	1	F1P8T3
GO:0050839	cell adhesion molecule binding	F	1	4	1.96078	0.578871	OVER	0.255686	1	F1PGS2
GO:2001233	regulation of apoptotic signaling pathway	P	1	4	1.96078	0.578871	OVER	0.255686	1	F1PGS2
GO:0046939	nucleotide phosphorylation	P	2	14	3.92157	2.02605	OVER	0.261495	1	E2R2C3, J9NU05
GO:0044724	single-organism carbohydrate catabolic process	P	2	14	3.92157	2.02605	OVER	0.261495	1	E2R2C3, J9NU05
GO:0009185	ribonucleoside diphosphate metabolic process	P	2	14	3.92157	2.02605	OVER	0.261495	1	E2R2C3, J9NU05
GO:0009179	purine ribonucleoside diphosphate metabolic process	P	2	14	3.92157	2.02605	OVER	0.261495	1	E2R2C3, J9NU05
GO:0009135	purine nucleoside diphosphate metabolic process	P	2	14	3.92157	2.02605	OVER	0.261495	1	E2R2C3, J9NU05
GO:0009132	nucleoside diphosphate metabolic process	P	2	14	3.92157	2.02605	OVER	0.261495	1	E2R2C3, J9NU05
GO:0022891	substrate-specific transmembrane transporter activity	F	2	14	3.92157	2.02605	OVER	0.261495	1	C4MW55, Q0QEN2
GO:0046031	ADP metabolic process	P	2	14	3.92157	2.02605	OVER	0.261495	1	E2R2C3, J9NU05
GO:0016052	carbohydrate catabolic process	P	2	14	3.92157	2.02605	OVER	0.261495	1	E2R2C3, J9NU05
GO:0019319	hexose biosynthetic process	P	2	14	3.92157	2.02605	OVER	0.261495	1	E2R2C3, J9NU05
GO:0006165	nucleoside diphosphate phosphorylation	P	2	14	3.92157	2.02605	OVER	0.261495	1	E2R2C3, J9NU05
GO:0006757	ATP generation from ADP	P	2	14	3.92157	2.02605	OVER	0.261495	1	E2R2C3, J9NU05
GO:0006096	glycolytic process	P	2	14	3.92157	2.02605	OVER	0.261495	1	E2R2C3, J9NU05
GO:0006094	gluconeogenesis	P	2	14	3.92157	2.02605	OVER	0.261495	1	E2R2C3, J9NU05
GO:0006006	glucose metabolic process	P	2	14	3.92157	2.02605	OVER	0.261495	1	E2R2C3, J9NU05
GO:0071702	organic substance transport	P	4	31	7.84314	4.48625	OVER	0.267311	1	E2R5U8, F1PH83, F6X5M3, F1PGS2
GO:0003008	system process	P	2	15	3.92157	2.17077	OVER	0.288872	1	J9NU17, F1PGS2
GO:0022008	neurogenesis	P	2	15	3.92157	2.17077	OVER	0.288872	1	F1P8T3, F1PP21
GO:0048699	generation of neurons	P	2	15	3.92157	2.17077	OVER	0.288872	1	F1P8T3, F1PP21
GO:0016020	membrane	C	8	160	15.6863	23.1548	UNDER	0.291677	1	C4MW55, F1P8T3, J9NU17, F1P8A6, E2RP87, F6X5M3, F1PGS2, Q0QEN2
GO:0005634	nucleus	C	2	61	3.92157	8.82779	UNDER	0.3002	1	E2RL75, E2RH23
GO:0044712	single-organism catabolic process	P	4	35	7.84314	5.06512	OVER	0.302363	1	F1PPB6, E2R2C3, J9NVE9, J9NU05
GO:0006955	immune response	P	2	64	3.92157	9.26194	UNDER	0.302582	1	F1P8T3, F1PGS2
GO:0048522	positive regulation of cellular process	P	7	66	13.7255	9.55137	OVER	0.307285	1	F1P8T3, F1P6H7, F1P8G0, F1PP21, J9NVE9, F1PBL4, F1PGS2
GO:0045834	positive regulation of lipid metabolic process	P	1	5	1.96078	0.723589	OVER	0.308851	1	J9NVE9
GO:0061695	transferase complex, transferring phosphorus-containing groups	C	1	5	1.96078	0.723589	OVER	0.308851	1	E2RL75
GO:0046903	secretion	P	1	5	1.96078	0.723589	OVER	0.308851	1	F1PGS2
GO:0050769	positive regulation of neurogenesis	P	1	5	1.96078	0.723589	OVER	0.308851	1	F1P8T3
GO:0061564	axon development	P	1	5	1.96078	0.723589	OVER	0.308851	1	F1P8T3
GO:0007417	central nervous system development	P	1	5	1.96078	0.723589	OVER	0.308851	1	F1PP21
GO:0043492	ATPase activity, coupled to movement of substances	F	1	5	1.96078	0.723589	OVER	0.308851	1	Q0QEN2
GO:0034109	homotypic cell-cell adhesion	P	1	5	1.96078	0.723589	OVER	0.308851	1	F1PGS2
GO:0051604	protein maturation	P	1	5	1.96078	0.723589	OVER	0.308851	1	F1PGS2
GO:0044451	nucleoplasm part	C	1	5	1.96078	0.723589	OVER	0.308851	1	E2RL75
GO:0044433	cytoplasmic vesicle part	C	1	5	1.96078	0.723589	OVER	0.308851	1	F6X5M3
GO:0044419	interspecies interaction between organisms	P	1	5	1.96078	0.723589	OVER	0.308851	1	Q9MZD3
GO:0044403	symbiosis, encompassing mutualism through parasitism	P	1	5	1.96078	0.723589	OVER	0.308851	1	Q9MZD3
GO:0031346	positive regulation of cell projection organization	P	1	5	1.96078	0.723589	OVER	0.308851	1	F1P8T3
GO:0010648	negative regulation of cell communication	P	1	5	1.96078	0.723589	OVER	0.308851	1	F1PGS2
GO:0023057	negative regulation of signaling	P	1	5	1.96078	0.723589	OVER	0.308851	1	F1PGS2
GO:0042730	fibrinolysis	P	1	5	1.96078	0.723589	OVER	0.308851	1	F1PGS2
GO:0032940	secretion by cell	P	1	5	1.96078	0.723589	OVER	0.308851	1	F1PGS2
GO:0048667	cell morphogenesis involved in neuron differentiation	P	1	5	1.96078	0.723589	OVER	0.308851	1	F1P8T3
GO:0001819	positive regulation of cytokine production	P	1	5	1.96078	0.723589	OVER	0.308851	1	F1PP21
GO:0016485	protein processing	P	1	5	1.96078	0.723589	OVER	0.308851	1	F1PGS2
GO:0009968	negative regulation of signal transduction	P	1	5	1.96078	0.723589	OVER	0.308851	1	F1PGS2
GO:0034470	ncRNA processing	P	1	5	1.96078	0.723589	OVER	0.308851	1	E2RL75
GO:0005507	copper ion binding	F	1	5	1.96078	0.723589	OVER	0.308851	1	C4MW55
GO:0032880	regulation of protein localization	P	1	5	1.96078	0.723589	OVER	0.308851	1	F1PGS2
GO:0051962	positive regulation of nervous system development	P	1	5	1.96078	0.723589	OVER	0.308851	1	F1P8T3
GO:0009896	positive regulation of catabolic process	P	1	5	1.96078	0.723589	OVER	0.308851	1	J9NVE9
GO:0043069	negative regulation of programmed cell death	P	1	5	1.96078	0.723589	OVER	0.308851	1	F1PGS2
GO:0043066	negative regulation of apoptotic process	P	1	5	1.96078	0.723589	OVER	0.308851	1	F1PGS2
GO:0022857	transmembrane transporter activity	F	2	16	3.92157	2.31548	OVER	0.316163	1	C4MW55, Q0QEN2
GO:0019318	hexose metabolic process	P	2	16	3.92157	2.31548	OVER	0.316163	1	E2R2C3, J9NU05
GO:0006090	pyruvate metabolic process	P	2	16	3.92157	2.31548	OVER	0.316163	1	E2R2C3, J9NU05
GO:0046364	monosaccharide biosynthetic process	P	2	16	3.92157	2.31548	OVER	0.316163	1	E2R2C3, J9NU05
GO:0006139	nucleobase-containing compound metabolic process	P	7	69	13.7255	9.98553	OVER	0.318624	1	C4MW55, F1PPB6, E2RL75, E2R2C3, J9NVE9, J9NU05, Q0QEN2
GO:0009605	response to external stimulus	P	4	37	7.84314	5.35456	OVER	0.324464	1	J9PB81, F1P8T3, F1PGS2, F1PGC3
GO:0003824	catalytic activity	F	12	213	23.5294	30.8249	UNDER	0.339014	1	J9PB81, C4MW55, F1PPB6, J9NU17, E2R7Z9, E2R2C3, F1PEH9, J9NU05, Q9MZD3, J9NWJ5, F1PBK6, Q0QEN2
GO:0032101	regulation of response to external stimulus	P	2	17	3.92157	2.4602	OVER	0.343245	1	F1P8T3, F1PGS2
GO:0044710	single-organism metabolic process	P	12	136	23.5294	19.6816	OVER	0.356254	1	C4MW55, E2R5U8, F1P8T3, F1PPB6, E2R2C3, J9NVE9, J9NU05, F1PGS2, F1Q432, J9NWJ5, F1PBK6, Q0QEN2
GO:2000113	negative regulation of cellular macromolecule biosynthetic process	P	1	6	1.96078	0.868307	OVER	0.358293	1	J9NVE9
GO:0045892	negative regulation of transcription, DNA-templated	P	1	6	1.96078	0.868307	OVER	0.358293	1	J9NVE9
GO:0061045	negative regulation of wound healing	P	1	6	1.96078	0.868307	OVER	0.358293	1	F1PGS2
GO:0051253	negative regulation of RNA metabolic process	P	1	6	1.96078	0.868307	OVER	0.358293	1	J9NVE9
GO:1900047	negative regulation of hemostasis	P	1	6	1.96078	0.868307	OVER	0.358293	1	F1PGS2
GO:0060548	negative regulation of cell death	P	1	6	1.96078	0.868307	OVER	0.358293	1	F1PGS2
GO:0010975	regulation of neuron projection development	P	1	6	1.96078	0.868307	OVER	0.358293	1	F1P8T3
GO:0051172	negative regulation of nitrogen compound metabolic process	P	1	6	1.96078	0.868307	OVER	0.358293	1	J9NVE9
GO:0001503	ossification	P	1	6	1.96078	0.868307	OVER	0.358293	1	F1P8T3
GO:0022804	active transmembrane transporter activity	F	1	6	1.96078	0.868307	OVER	0.358293	1	Q0QEN2
GO:0045664	regulation of neuron differentiation	P	1	6	1.96078	0.868307	OVER	0.358293	1	F1P8T3
GO:0051050	positive regulation of transport	P	1	6	1.96078	0.868307	OVER	0.358293	1	F1PGS2
GO:1902679	negative regulation of RNA biosynthetic process	P	1	6	1.96078	0.868307	OVER	0.358293	1	J9NVE9
GO:0030195	negative regulation of blood coagulation	P	1	6	1.96078	0.868307	OVER	0.358293	1	F1PGS2
GO:1990234	transferase complex	C	1	6	1.96078	0.868307	OVER	0.358293	1	E2RL75
GO:1903507	negative regulation of nucleic acid-templated transcription	P	1	6	1.96078	0.868307	OVER	0.358293	1	J9NVE9
GO:0007160	cell-matrix adhesion	P	1	6	1.96078	0.868307	OVER	0.358293	1	F1PGS2
GO:0016459	myosin complex	C	1	6	1.96078	0.868307	OVER	0.358293	1	J9NU17
GO:0045333	cellular respiration	P	1	6	1.96078	0.868307	OVER	0.358293	1	C4MW55
GO:0045934	negative regulation of nucleobase-containing compound metabolic process	P	1	6	1.96078	0.868307	OVER	0.358293	1	J9NVE9
GO:0009894	regulation of catabolic process	P	1	6	1.96078	0.868307	OVER	0.358293	1	J9NVE9
GO:0005996	monosaccharide metabolic process	P	2	18	3.92157	2.60492	OVER	0.37001	1	E2R2C3, J9NU05
GO:0016051	carbohydrate biosynthetic process	P	2	18	3.92157	2.60492	OVER	0.37001	1	E2R2C3, J9NU05
GO:0006812	cation transport	P	2	18	3.92157	2.60492	OVER	0.37001	1	C4MW55, Q0QEN2
GO:0044877	macromolecular complex binding	F	0	20	0	2.89436	UNDER	0.387745	1
GO:0051674	localization of cell	P	0	19	0	2.74964	UNDER	0.387888	1
GO:0048870	cell motility	P	0	19	0	2.74964	UNDER	0.387888	1
GO:0032403	protein complex binding	F	0	19	0	2.74964	UNDER	0.387888	1
GO:0016477	cell migration	P	0	19	0	2.74964	UNDER	0.387888	1
GO:0009057	macromolecule catabolic process	P	0	21	0	3.03907	UNDER	0.389481	1
GO:0050790	regulation of catalytic activity	P	0	22	0	3.18379	UNDER	0.392926	1
GO:0006909	phagocytosis	P	0	22	0	3.18379	UNDER	0.392926	1
GO:1901363	heterocyclic compound binding	F	9	98	17.6471	14.1823	OVER	0.394343	1	P60529, J9NU17, J9JHF7, P60524, F1PYZ1, F1PP21, J9JHZ3, F1PGC3, Q0QEN2
GO:0097159	organic cyclic compound binding	F	9	99	17.6471	14.3271	OVER	0.397933	1	P60529, J9NU17, J9JHF7, P60524, F1PYZ1, F1PP21, J9JHZ3, F1PGC3, Q0QEN2
GO:0032102	negative regulation of response to external stimulus	P	1	7	1.96078	1.01302	OVER	0.404266	1	F1PGS2
GO:0071345	cellular response to cytokine stimulus	P	1	7	1.96078	1.01302	OVER	0.404266	1	F1PGC3
GO:0003774	motor activity	F	1	7	1.96078	1.01302	OVER	0.404266	1	J9NU17
GO:0009069	serine family amino acid metabolic process	P	1	7	1.96078	1.01302	OVER	0.404266	1	J9NU05
GO:0001558	regulation of cell growth	P	1	7	1.96078	1.01302	OVER	0.404266	1	F1P8T3
GO:0009617	response to bacterium	P	1	7	1.96078	1.01302	OVER	0.404266	1	F1PGS2
GO:0016049	cell growth	P	1	7	1.96078	1.01302	OVER	0.404266	1	F1P8T3
GO:0034097	response to cytokine	P	1	7	1.96078	1.01302	OVER	0.404266	1	F1PGC3
GO:0010720	positive regulation of cell development	P	1	7	1.96078	1.01302	OVER	0.404266	1	F1P8T3
GO:0000904	cell morphogenesis involved in differentiation	P	1	7	1.96078	1.01302	OVER	0.404266	1	F1P8T3
GO:0034660	ncRNA metabolic process	P	1	7	1.96078	1.01302	OVER	0.404266	1	E2RL75
GO:1903035	negative regulation of response to wounding	P	1	7	1.96078	1.01302	OVER	0.404266	1	F1PGS2
GO:0040008	regulation of growth	P	1	7	1.96078	1.01302	OVER	0.404266	1	F1P8T3
GO:0031327	negative regulation of cellular biosynthetic process	P	1	7	1.96078	1.01302	OVER	0.404266	1	J9NVE9
GO:0007267	cell-cell signaling	P	1	7	1.96078	1.01302	OVER	0.404266	1	F1PGS2
GO:0045454	cell redox homeostasis	P	1	7	1.96078	1.01302	OVER	0.404266	1	J9NWJ5
GO:0010558	negative regulation of macromolecule biosynthetic process	P	1	7	1.96078	1.01302	OVER	0.404266	1	J9NVE9
GO:0044242	cellular lipid catabolic process	P	1	7	1.96078	1.01302	OVER	0.404266	1	J9NVE9
GO:0050819	negative regulation of coagulation	P	1	7	1.96078	1.01302	OVER	0.404266	1	F1PGS2
GO:0009890	negative regulation of biosynthetic process	P	1	7	1.96078	1.01302	OVER	0.404266	1	J9NVE9
GO:0009887	organ morphogenesis	P	1	7	1.96078	1.01302	OVER	0.404266	1	F1PP21
GO:0004866	endopeptidase inhibitor activity	F	0	24	0	3.47323	UNDER	0.404309	1
GO:0061135	endopeptidase regulator activity	F	0	24	0	3.47323	UNDER	0.404309	1
GO:0071944	cell periphery	C	5	52	9.80392	7.52533	OVER	0.404491	1	F1P8T3, J9NU17, F1Q0N9, F6X5M3, F1PGS2
GO:0042060	wound healing	P	3	25	5.88235	3.61795	OVER	0.411948	1	F1P8G0, F1PBL4, F1PGS2
GO:0032268	regulation of cellular protein metabolic process	P	3	25	5.88235	3.61795	OVER	0.411948	1	F1P8T3, J9NVE9, F1PGS2
GO:0046872	metal ion binding	F	10	109	19.6078	15.7742	OVER	0.413325	1	C4MW55, P60529, J9JHF7, P60524, J9NYN2, F1PYZ1, E2RH23, F1PP21, J9JHZ3, F1PBK6
GO:0036094	small molecule binding	F	2	55	3.92157	7.95948	UNDER	0.415541	1	J9NU17, Q0QEN2
GO:0043168	anion binding	F	2	57	3.92157	8.24891	UNDER	0.417067	1	J9NU17, Q0QEN2
GO:0043169	cation binding	F	10	112	19.6078	16.2084	OVER	0.420399	1	C4MW55, P60529, J9JHF7, P60524, J9NYN2, F1PYZ1, E2RH23, F1PP21, J9JHZ3, F1PBK6
GO:0010604	positive regulation of macromolecule metabolic process	P	3	26	5.88235	3.76266	OVER	0.420701	1	F1P8T3, J9NVE9, F1PGS2
GO:0048513	organ development	P	3	26	5.88235	3.76266	OVER	0.420701	1	F1P8T3, F1PP21, J9NVT1
GO:0010646	regulation of cell communication	P	3	27	5.88235	3.90738	OVER	0.430437	1	F1P8T3, J9NVE9, F1PGS2
GO:0023051	regulation of signaling	P	3	27	5.88235	3.90738	OVER	0.430437	1	F1P8T3, J9NVE9, F1PGS2
GO:0050878	regulation of body fluid levels	P	3	27	5.88235	3.90738	OVER	0.430437	1	F1P8G0, F1PBL4, F1PGS2
GO:0043232	intracellular non-membrane-bounded organelle	C	6	62	11.7647	8.9725	OVER	0.432059	1	J9NU17, F1PTY1, E2REU6, F1Q0N9, E2R489, J9NWS3
GO:0043228	non-membrane-bounded organelle	C	6	62	11.7647	8.9725	OVER	0.432059	1	J9NU17, F1PTY1, E2REU6, F1Q0N9, E2R489, J9NWS3
GO:0051716	cellular response to stimulus	P	6	121	11.7647	17.5109	UNDER	0.433675	1	F1P8T3, F1P8G0, J9NVE9, F1PBL4, F1PGS2, F1PGC3
GO:0044260	cellular macromolecule metabolic process	P	6	121	11.7647	17.5109	UNDER	0.433675	1	F1P8T3, E2RL75, E2R2C3, J9NVE9, Q9MZD3, F1PGS2
GO:0043226	organelle	C	20	242	39.2157	35.0217	OVER	0.435066	1	J9PB81, J9NU17, E2R7Z9, F1PTY1, E2RL75, E2REU6, J9NYN2, F1Q0N9, E2RH23, F1PH83, F1PEH9, F6X5M3, F1P6P2, E2R489, Q9MZD3, F1PGS2, J9NWJ5, F1PBK6, J9NWS3, Q0QEN2
GO:0031012	extracellular matrix	C	3	28	5.88235	4.0521	OVER	0.441036	1	F1P6H7, F1PF31, F1Q432
GO:0031325	positive regulation of cellular metabolic process	P	3	28	5.88235	4.0521	OVER	0.441036	1	F1P8T3, J9NVE9, F1PGS2
GO:0050767	regulation of neurogenesis	P	1	8	1.96078	1.15774	OVER	0.447009	1	F1P8T3
GO:0098662	inorganic cation transmembrane transport	P	1	8	1.96078	1.15774	OVER	0.447009	1	Q0QEN2
GO:0098660	inorganic ion transmembrane transport	P	1	8	1.96078	1.15774	OVER	0.447009	1	Q0QEN2
GO:0098655	cation transmembrane transport	P	1	8	1.96078	1.15774	OVER	0.447009	1	Q0QEN2
GO:0031589	cell-substrate adhesion	P	1	8	1.96078	1.15774	OVER	0.447009	1	F1PGS2
GO:0006396	RNA processing	P	1	8	1.96078	1.15774	OVER	0.447009	1	E2RL75
GO:0060341	regulation of cellular localization	P	1	8	1.96078	1.15774	OVER	0.447009	1	F1PGS2
GO:0048812	neuron projection morphogenesis	P	1	8	1.96078	1.15774	OVER	0.447009	1	F1P8T3
GO:0016616	oxidoreductase activity, acting on the CH-OH group of donors, NAD or NADP as acceptor	F	1	8	1.96078	1.15774	OVER	0.447009	1	J9NU05
GO:0016614	oxidoreductase activity, acting on CH-OH group of donors	F	1	8	1.96078	1.15774	OVER	0.447009	1	J9NU05
GO:0005739	mitochondrion	C	1	8	1.96078	1.15774	OVER	0.447009	1	Q0QEN2
GO:0022604	regulation of cell morphogenesis	P	1	8	1.96078	1.15774	OVER	0.447009	1	F1P8T3
GO:0019216	regulation of lipid metabolic process	P	1	8	1.96078	1.15774	OVER	0.447009	1	J9NVE9
GO:0030155	regulation of cell adhesion	P	1	8	1.96078	1.15774	OVER	0.447009	1	F1PGS2
GO:0001817	regulation of cytokine production	P	1	8	1.96078	1.15774	OVER	0.447009	1	F1PP21
GO:0001816	cytokine production	P	1	8	1.96078	1.15774	OVER	0.447009	1	F1PP21
GO:0046434	organophosphate catabolic process	P	1	8	1.96078	1.15774	OVER	0.447009	1	F1PPB6
GO:0051960	regulation of nervous system development	P	1	8	1.96078	1.15774	OVER	0.447009	1	F1P8T3
GO:0016337	single organismal cell-cell adhesion	P	1	8	1.96078	1.15774	OVER	0.447009	1	F1PGS2
GO:0012505	endomembrane system	C	3	29	5.88235	4.19682	OVER	0.452383	1	F1PH83, F6X5M3, F1PGS2
GO:0022607	cellular component assembly	P	3	29	5.88235	4.19682	OVER	0.452383	1	F1P8G0, F1PBL4, F1PGS2
GO:0016491	oxidoreductase activity	F	3	29	5.88235	4.19682	OVER	0.452383	1	C4MW55, J9NU05, J9NWJ5
GO:0048519	negative regulation of biological process	P	3	70	5.88235	10.1302	UNDER	0.462451	1	F1PP21, J9NVE9, F1PGS2
GO:0051246	regulation of protein metabolic process	P	3	30	5.88235	4.34153	OVER	0.464372	1	F1P8T3, J9NVE9, F1PGS2
GO:0009611	response to wounding	P	3	30	5.88235	4.34153	OVER	0.464372	1	F1P8G0, F1PBL4, F1PGS2
GO:0044459	plasma membrane part	C	3	30	5.88235	4.34153	OVER	0.464372	1	J9NU17, F6X5M3, F1PGS2
GO:0022610	biological adhesion	P	3	30	5.88235	4.34153	OVER	0.464372	1	F1P6H7, F1PF31, F1PGS2
GO:0007155	cell adhesion	P	3	30	5.88235	4.34153	OVER	0.464372	1	F1P6H7, F1PF31, F1PGS2
GO:0046483	heterocycle metabolic process	P	7	76	13.7255	10.9986	OVER	0.474196	1	C4MW55, F1PPB6, E2RL75, E2R2C3, J9NVE9, J9NU05, Q0QEN2
GO:0006725	cellular aromatic compound metabolic process	P	7	77	13.7255	11.1433	OVER	0.477812	1	C4MW55, F1PPB6, E2RL75, E2R2C3, J9NVE9, J9NU05, Q0QEN2
GO:0007600	sensory perception	P	1	9	1.96078	1.30246	OVER	0.486745	1	J9NU17
GO:0098602	single organism cell adhesion	P	1	9	1.96078	1.30246	OVER	0.486745	1	F1PGS2
GO:0034220	ion transmembrane transport	P	1	9	1.96078	1.30246	OVER	0.486745	1	Q0QEN2
GO:0045597	positive regulation of cell differentiation	P	1	9	1.96078	1.30246	OVER	0.486745	1	F1P8T3
GO:0031344	regulation of cell projection organization	P	1	9	1.96078	1.30246	OVER	0.486745	1	F1P8T3
GO:0030198	extracellular matrix organization	P	1	9	1.96078	1.30246	OVER	0.486745	1	F1Q432
GO:0044262	cellular carbohydrate metabolic process	P	1	9	1.96078	1.30246	OVER	0.486745	1	E2R2C3
GO:0015980	energy derivation by oxidation of organic compounds	P	1	9	1.96078	1.30246	OVER	0.486745	1	C4MW55
GO:0042623	ATPase activity, coupled	F	1	9	1.96078	1.30246	OVER	0.486745	1	Q0QEN2
GO:0050877	neurological system process	P	1	9	1.96078	1.30246	OVER	0.486745	1	J9NU17
GO:0043062	extracellular structure organization	P	1	9	1.96078	1.30246	OVER	0.486745	1	F1Q432
GO:0009893	positive regulation of metabolic process	P	3	32	5.88235	4.63097	OVER	0.489887	1	F1P8T3, J9NVE9, F1PGS2
GO:0006950	response to stress	P	4	83	7.84314	12.0116	UNDER	0.497589	1	F1P8G0, J9NVE9, F1PBL4, F1PGS2
GO:0044767	single-organism developmental process	P	4	85	7.84314	12.301	UNDER	0.498038	1	F1P8T3, F1P6H7, F1PP21, J9NVT1
GO:0032502	developmental process	P	4	86	7.84314	12.4457	UNDER	0.498925	1	F1P8T3, F1P6H7, F1PP21, J9NVT1
GO:0010556	regulation of macromolecule biosynthetic process	P	1	34	1.96078	4.92041	UNDER	0.502297	1	J9NVE9
GO:0044428	nuclear part	C	1	33	1.96078	4.77569	UNDER	0.502962	1	E2RL75
GO:0070013	intracellular organelle lumen	C	1	36	1.96078	5.20984	UNDER	0.504009	1	E2RL75
GO:0031974	membrane-enclosed lumen	C	1	36	1.96078	5.20984	UNDER	0.504009	1	E2RL75
GO:0043233	organelle lumen	C	1	36	1.96078	5.20984	UNDER	0.504009	1	E2RL75
GO:0051171	regulation of nitrogen compound metabolic process	P	1	37	1.96078	5.35456	UNDER	0.506275	1	J9NVE9
GO:0006996	organelle organization	P	1	37	1.96078	5.35456	UNDER	0.506275	1	E2R357
GO:0031326	regulation of cellular biosynthetic process	P	1	37	1.96078	5.35456	UNDER	0.506275	1	J9NVE9
GO:0009889	regulation of biosynthetic process	P	1	39	1.96078	5.64399	UNDER	0.513344	1	J9NVE9
GO:0051270	regulation of cellular component movement	P	1	10	1.96078	1.44718	OVER	0.523681	1	F1P8T3
GO:0072562	blood microparticle	C	1	10	1.96078	1.44718	OVER	0.523681	1	F1PGS2
GO:1901137	carbohydrate derivative biosynthetic process	P	1	10	1.96078	1.44718	OVER	0.523681	1	Q0QEN2
GO:1900046	regulation of hemostasis	P	1	10	1.96078	1.44718	OVER	0.523681	1	F1PGS2
GO:0098588	bounding membrane of organelle	C	1	10	1.96078	1.44718	OVER	0.523681	1	F6X5M3
GO:0060284	regulation of cell development	P	1	10	1.96078	1.44718	OVER	0.523681	1	F1P8T3
GO:0040012	regulation of locomotion	P	1	10	1.96078	1.44718	OVER	0.523681	1	F1P8T3
GO:0040007	growth	P	1	10	1.96078	1.44718	OVER	0.523681	1	F1P8T3
GO:0010629	negative regulation of gene expression	P	1	10	1.96078	1.44718	OVER	0.523681	1	J9NVE9
GO:0030193	regulation of blood coagulation	P	1	10	1.96078	1.44718	OVER	0.523681	1	F1PGS2
GO:0009986	cell surface	C	1	10	1.96078	1.44718	OVER	0.523681	1	F1PGS2
GO:0005578	proteinaceous extracellular matrix	C	1	10	1.96078	1.44718	OVER	0.523681	1	F1Q432
GO:0023052	signaling	P	5	98	9.80392	14.1823	UNDER	0.525162	1	F1P8T3, F1P8G0, J9NVE9, F1PBL4, F1PGS2
GO:0007154	cell communication	P	5	99	9.80392	14.3271	UNDER	0.525462	1	F1P8T3, F1P8G0, J9NVE9, F1PBL4, F1PGS2
GO:0044700	single organism signaling	P	5	96	9.80392	13.8929	UNDER	0.525709	1	F1P8T3, F1P8G0, J9NVE9, F1PBL4, F1PGS2
GO:0009987	cellular process	P	26	400	50.9804	57.8871	UNDER	0.542633	1	C4MW55, F1PDY8, E2R5U8, F1P8T3, F1PPB6, F1P6H7, E2R7Z9, E2RL75, E2REU6, F1PF31, E2R2C3, F1P8G0, F1PH83, F1PP21, J9NVE9, F1PBL4, J9NU05, Q9MZD3, F1PGS2, J9NVT1, F1Q432, E2R357, J9NWJ5, F1PBK6, F1PGC3, Q0QEN2
GO:0005515	protein binding	F	20	313	39.2157	45.2967	UNDER	0.550105	1	E2R5U8, F1P8T3, J9P0D4, F1P6H7, J9NU17, F1PF31, F1P8A6, E2RH23, F1P8G0, E2RP87, F1PBL4, F6X5M3, F1P6P2, J9P9B9, F1PGS2, J9NVT1, F1Q432, F1PBK6, F1PGC3, J9NYI6
GO:0006464	cellular protein modification process	P	4	45	7.84314	6.5123	OVER	0.550812	1	F1P8T3, J9NVE9, Q9MZD3, F1PGS2
GO:0036211	protein modification process	P	4	45	7.84314	6.5123	OVER	0.550812	1	F1P8T3, J9NVE9, Q9MZD3, F1PGS2
GO:0016887	ATPase activity	F	1	11	1.96078	1.5919	OVER	0.55801	1	Q0QEN2
GO:1901615	organic hydroxy compound metabolic process	P	1	11	1.96078	1.5919	OVER	0.55801	1	E2R5U8
GO:0042981	regulation of apoptotic process	P	1	11	1.96078	1.5919	OVER	0.55801	1	F1PGS2
GO:0016042	lipid catabolic process	P	1	11	1.96078	1.5919	OVER	0.55801	1	J9NVE9
GO:0048858	cell projection morphogenesis	P	1	11	1.96078	1.5919	OVER	0.55801	1	F1P8T3
GO:0032990	cell part morphogenesis	P	1	11	1.96078	1.5919	OVER	0.55801	1	F1P8T3
GO:0006066	alcohol metabolic process	P	1	11	1.96078	1.5919	OVER	0.55801	1	E2R5U8
GO:0050818	regulation of coagulation	P	1	11	1.96078	1.5919	OVER	0.55801	1	F1PGS2
GO:0043067	regulation of programmed cell death	P	1	11	1.96078	1.5919	OVER	0.55801	1	F1PGS2
GO:0031090	organelle membrane	C	1	11	1.96078	1.5919	OVER	0.55801	1	F6X5M3
GO:0043412	macromolecule modification	P	4	46	7.84314	6.65702	OVER	0.558865	1	F1P8T3, J9NVE9, Q9MZD3, F1PGS2
GO:0003676	nucleic acid binding	F	2	48	3.92157	6.94645	UNDER	0.566719	1	F1PP21, F1PGC3
GO:0097367	carbohydrate derivative binding	F	2	51	3.92157	7.38061	UNDER	0.568788	1	J9NU17, Q0QEN2
GO:0061041	regulation of wound healing	P	1	12	1.96078	1.73661	OVER	0.589913	1	F1PGS2
GO:0051094	positive regulation of developmental process	P	1	12	1.96078	1.73661	OVER	0.589913	1	F1P8T3
GO:0072359	circulatory system development	P	1	12	1.96078	1.73661	OVER	0.589913	1	F1PP21
GO:0072358	cardiovascular system development	P	1	12	1.96078	1.73661	OVER	0.589913	1	F1PP21
GO:0006954	inflammatory response	P	1	12	1.96078	1.73661	OVER	0.589913	1	J9NVE9
GO:0042995	cell projection	C	1	12	1.96078	1.73661	OVER	0.589913	1	J9NU17
GO:0052689	carboxylic ester hydrolase activity	F	1	12	1.96078	1.73661	OVER	0.589913	1	F1PBK6
GO:0042127	regulation of cell proliferation	P	1	12	1.96078	1.73661	OVER	0.589913	1	F1PF31
GO:0048666	neuron development	P	1	12	1.96078	1.73661	OVER	0.589913	1	F1P8T3
GO:0031175	neuron projection development	P	1	12	1.96078	1.73661	OVER	0.589913	1	F1P8T3
GO:0070062	extracellular exosome	C	3	61	5.88235	8.82779	UNDER	0.609809	1	E2R7Z9, F1PGS2, F1PBK6
GO:0065010	extracellular membrane-bounded organelle	C	3	61	5.88235	8.82779	UNDER	0.609809	1	E2R7Z9, F1PGS2, F1PBK6
GO:0043230	extracellular organelle	C	3	61	5.88235	8.82779	UNDER	0.609809	1	E2R7Z9, F1PGS2, F1PBK6
GO:1903561	extracellular vesicle	C	3	61	5.88235	8.82779	UNDER	0.609809	1	E2R7Z9, F1PGS2, F1PBK6
GO:0007275	multicellular organismal development	P	3	65	5.88235	9.40666	UNDER	0.610465	1	F1P8T3, F1PP21, J9NVT1
GO:0044249	cellular biosynthetic process	P	3	66	5.88235	9.55137	UNDER	0.611795	1	E2R7Z9, J9NVE9, Q0QEN2
GO:0004298	threonine-type endopeptidase activity	F	0	14	0	2.02605	UNDER	0.614394	1
GO:0016773	phosphotransferase activity, alcohol group as acceptor	F	0	14	0	2.02605	UNDER	0.614394	1
GO:0015630	microtubule cytoskeleton	C	0	14	0	2.02605	UNDER	0.614394	1
GO:0005839	proteasome core complex	C	0	14	0	2.02605	UNDER	0.614394	1
GO:0006869	lipid transport	P	0	14	0	2.02605	UNDER	0.614394	1
GO:0070003	threonine-type peptidase activity	F	0	14	0	2.02605	UNDER	0.614394	1
GO:0030054	cell junction	C	0	14	0	2.02605	UNDER	0.614394	1
GO:0038023	signaling receptor activity	F	0	13	0	1.88133	UNDER	0.614617	1
GO:1901700	response to oxygen-containing compound	P	0	13	0	1.88133	UNDER	0.614617	1
GO:0009719	response to endogenous stimulus	P	0	13	0	1.88133	UNDER	0.614617	1
GO:0051336	regulation of hydrolase activity	P	0	13	0	1.88133	UNDER	0.614617	1
GO:0030001	metal ion transport	P	0	13	0	1.88133	UNDER	0.614617	1
GO:0007049	cell cycle	P	0	13	0	1.88133	UNDER	0.614617	1
GO:0000502	proteasome complex	C	0	15	0	2.17077	UNDER	0.616183	1
GO:0010876	lipid localization	P	0	15	0	2.17077	UNDER	0.616183	1
GO:0005887	integral component of plasma membrane	C	0	15	0	2.17077	UNDER	0.616183	1
GO:0002252	immune effector process	P	0	15	0	2.17077	UNDER	0.616183	1
GO:0016301	kinase activity	F	0	15	0	2.17077	UNDER	0.616183	1
GO:0008092	cytoskeletal protein binding	F	0	16	0	2.31548	UNDER	0.619705	1
GO:0004871	signal transducer activity	F	0	16	0	2.31548	UNDER	0.619705	1
GO:0051603	proteolysis involved in cellular protein catabolic process	P	0	16	0	2.31548	UNDER	0.619705	1
GO:0031226	intrinsic component of plasma membrane	C	0	16	0	2.31548	UNDER	0.619705	1
GO:0044257	cellular protein catabolic process	P	0	16	0	2.31548	UNDER	0.619705	1
GO:0007010	cytoskeleton organization	P	0	16	0	2.31548	UNDER	0.619705	1
GO:0044265	cellular macromolecule catabolic process	P	0	17	0	2.4602	UNDER	0.624711	1
GO:0005488	binding	F	31	460	60.7843	66.5702	UNDER	0.630786	1	C4MW55, E2R5U8, F1P8T3, J9P0D4, P60529, F1P6H7, J9NU17, J9JHF7, P60524, E2R7Z9, E2RL75, F1PF31, F1P8A6, J9NYN2, F1PYZ1, E2RH23, F1P8G0, F1PP21, E2RP87, F1PBL4, F6X5M3, F1P6P2, J9P9B9, F1PGS2, J9NVT1, J9JHZ3, F1Q432, F1PBK6, F1PGC3, J9NYI6, Q0QEN2
GO:0016772	transferase activity, transferring phosphorus-containing groups	F	0	18	0	2.60492	UNDER	0.630976	1
GO:0048878	chemical homeostasis	P	0	18	0	2.60492	UNDER	0.630976	1
GO:0030163	protein catabolic process	P	0	18	0	2.60492	UNDER	0.630976	1
GO:0044255	cellular lipid metabolic process	P	2	19	3.92157	2.74964	OVER	0.638297	1	E2R5U8, J9NVE9
GO:0044267	cellular protein metabolic process	P	4	77	7.84314	11.1433	UNDER	0.639693	1	F1P8T3, J9NVE9, Q9MZD3, F1PGS2
GO:0032787	monocarboxylic acid metabolic process	P	2	20	3.92157	2.89436	OVER	0.646497	1	E2R2C3, J9NU05
GO:0048468	cell development	P	2	20	3.92157	2.89436	OVER	0.646497	1	F1P8T3, F1PP21
GO:0022892	substrate-specific transporter activity	F	2	20	3.92157	2.89436	OVER	0.646497	1	C4MW55, Q0QEN2
GO:0071704	organic substance metabolic process	P	17	265	33.3333	38.3502	UNDER	0.64688	1	J9PB81, C4MW55, E2R5U8, F1P8T3, F1PPB6, F1P6H7, E2R7Z9, E2RL75, E2R2C3, F1PP21, J9NVE9, J9NU05, Q9MZD3, F1PGS2, F1Q432, J9NWJ5, Q0QEN2
GO:0034641	cellular nitrogen compound metabolic process	P	7	85	13.7255	12.301	OVER	0.651476	1	C4MW55, F1PPB6, E2RL75, E2R2C3, J9NVE9, J9NU05, Q0QEN2
GO:1901360	organic cyclic compound metabolic process	P	7	85	13.7255	12.301	OVER	0.651476	1	C4MW55, F1PPB6, E2RL75, E2R2C3, J9NVE9, J9NU05, Q0QEN2
GO:0044283	small molecule biosynthetic process	P	2	21	3.92157	3.03907	OVER	0.655416	1	E2R2C3, J9NU05
GO:0016043	cellular component organization	P	7	88	13.7255	12.7352	OVER	0.660968	1	F1P8T3, F1P6H7, F1P8G0, F1PBL4, F1PGS2, F1Q432, E2R357
GO:0007165	signal transduction	P	5	92	9.80392	13.314	UNDER	0.66301	1	F1P8T3, F1P8G0, J9NVE9, F1PBL4, F1PGS2
GO:0006811	ion transport	P	2	22	3.92157	3.18379	OVER	0.66491	1	C4MW55, Q0QEN2
GO:0017111	nucleoside-triphosphatase activity	F	2	23	3.92157	3.32851	OVER	0.674855	1	J9NU17, Q0QEN2
GO:0016818	hydrolase activity, acting on acid anhydrides, in phosphorus-containing anhydrides	F	2	24	3.92157	3.47323	OVER	0.685138	1	J9NU17, Q0QEN2
GO:0016817	hydrolase activity, acting on acid anhydrides	F	2	24	3.92157	3.47323	OVER	0.685138	1	J9NU17, Q0QEN2
GO:0016788	hydrolase activity, acting on ester bonds	F	2	24	3.92157	3.47323	OVER	0.685138	1	E2R7Z9, F1PBK6
GO:0007399	nervous system development	P	2	24	3.92157	3.47323	OVER	0.685138	1	F1P8T3, F1PP21
GO:0016462	pyrophosphatase activity	F	2	24	3.92157	3.47323	OVER	0.685138	1	J9NU17, Q0QEN2
GO:0044707	single-multicellular organism process	P	7	117	13.7255	16.932	UNDER	0.696303	1	F1P8T3, J9NU17, F1P8G0, F1PP21, F1PBL4, F1PGS2, J9NVT1
GO:0044723	single-organism carbohydrate metabolic process	P	2	26	3.92157	3.76266	OVER	0.706339	1	E2R2C3, J9NU05
GO:0007166	cell surface receptor signaling pathway	P	2	26	3.92157	3.76266	OVER	0.706339	1	F1P8T3, F1PGS2
GO:0004252	serine-type endopeptidase activity	F	1	28	1.96078	4.0521	UNDER	0.713172	1	J9PB81
GO:0006355	regulation of transcription, DNA-templated	P	1	28	1.96078	4.0521	UNDER	0.713172	1	J9NVE9
GO:0017171	serine hydrolase activity	F	1	28	1.96078	4.0521	UNDER	0.713172	1	J9PB81
GO:0010033	response to organic substance	P	1	28	1.96078	4.0521	UNDER	0.713172	1	F1PGC3
GO:1903506	regulation of nucleic acid-templated transcription	P	1	28	1.96078	4.0521	UNDER	0.713172	1	J9NVE9
GO:0008236	serine-type peptidase activity	F	1	28	1.96078	4.0521	UNDER	0.713172	1	J9PB81
GO:0051128	regulation of cellular component organization	P	1	27	1.96078	3.90738	UNDER	0.713342	1	F1P8T3
GO:2001141	regulation of RNA biosynthetic process	P	1	29	1.96078	4.19682	UNDER	0.713795	1	J9NVE9
GO:0042592	homeostatic process	P	1	30	1.96078	4.34153	UNDER	0.715154	1	J9NWJ5
GO:0051252	regulation of RNA metabolic process	P	1	30	1.96078	4.34153	UNDER	0.715154	1	J9NVE9
GO:2000112	regulation of cellular macromolecule biosynthetic process	P	1	31	1.96078	4.48625	UNDER	0.717191	1	J9NVE9
GO:0006351	transcription, DNA-templated	P	1	31	1.96078	4.48625	UNDER	0.717191	1	J9NVE9
GO:0031981	nuclear lumen	C	1	31	1.96078	4.48625	UNDER	0.717191	1	E2RL75
GO:0097659	nucleic acid-templated transcription	P	1	31	1.96078	4.48625	UNDER	0.717191	1	J9NVE9
GO:0032774	RNA biosynthetic process	P	1	32	1.96078	4.63097	UNDER	0.719851	1	J9NVE9
GO:0019219	regulation of nucleobase-containing compound metabolic process	P	1	32	1.96078	4.63097	UNDER	0.719851	1	J9NVE9
GO:0044711	single-organism biosynthetic process	P	3	34	5.88235	4.92041	OVER	0.72682	1	E2R2C3, J9NU05, Q0QEN2
GO:0043229	intracellular organelle	C	13	167	25.4902	24.1679	OVER	0.728664	1	J9PB81, J9NU17, F1PTY1, E2RL75, E2REU6, F1Q0N9, E2RH23, F1PH83, F6X5M3, E2R489, F1PGS2, J9NWS3, Q0QEN2
GO:0033036	macromolecule localization	P	3	36	5.88235	5.20984	OVER	0.73564	1	F1PH83, F6X5M3, F1PGS2
GO:0043227	membrane-bounded organelle	C	12	190	23.5294	27.4964	UNDER	0.739588	1	J9PB81, E2R7Z9, E2RL75, J9NYN2, E2RH23, F1PH83, F6X5M3, Q9MZD3, F1PGS2, J9NWJ5, F1PBK6, Q0QEN2
GO:0044085	cellular component biogenesis	P	3	39	5.88235	5.64399	OVER	0.751495	1	F1P8G0, F1PBL4, F1PGS2
GO:0006952	defense response	P	2	42	3.92157	6.07815	UNDER	0.759959	1	J9NVE9, F1PGS2
GO:0044271	cellular nitrogen compound biosynthetic process	P	2	43	3.92157	6.22287	UNDER	0.760271	1	J9NVE9, Q0QEN2
GO:0090304	nucleic acid metabolic process	P	2	44	3.92157	6.36758	UNDER	0.761019	1	E2RL75, J9NVE9
GO:0000166	nucleotide binding	F	2	44	3.92157	6.36758	UNDER	0.761019	1	J9NU17, Q0QEN2
GO:1901265	nucleoside phosphate binding	F	2	44	3.92157	6.36758	UNDER	0.761019	1	J9NU17, Q0QEN2
GO:0044699	single-organism process	P	29	388	56.8627	56.1505	OVER	0.762447	1	C4MW55, F1PDY8, E2R5U8, F1P8T3, F1PPB6, P60529, F1P6H7, J9NU17, J9JHF7, P60524, E2REU6, F1PF31, F1PYZ1, E2R2C3, F1P8G0, F1PP21, F1PEH9, J9NVE9, F1PBL4, J9NU05, F1PGS2, J9NVT1, J9JHZ3, F1Q432, E2R357, J9NWJ5, F1PBK6, J9NWS3, Q0QEN2
GO:0008152	metabolic process	P	19	286	37.2549	41.3893	UNDER	0.762793	1	J9PB81, C4MW55, E2R5U8, F1P8T3, F1PPB6, F1P6H7, E2R7Z9, E2RL75, E2R2C3, F1PP21, F1PEH9, J9NVE9, J9NU05, Q9MZD3, F1PGS2, F1Q432, J9NWJ5, F1PBK6, Q0QEN2
GO:0042221	response to chemical	P	4	49	7.84314	7.09117	OVER	0.770489	1	F1PDY8, J9NVE9, F1PGS2, F1PGC3
GO:0005886	plasma membrane	C	4	50	7.84314	7.23589	OVER	0.773363	1	F1P8T3, J9NU17, F6X5M3, F1PGS2
GO:1901575	organic substance catabolic process	P	4	52	7.84314	7.52533	OVER	0.779902	1	F1PPB6, E2R2C3, J9NVE9, J9NU05
GO:0010467	gene expression	P	4	53	7.84314	7.67004	OVER	0.78352	1	E2RL75, F1PP21, J9NVE9, F1PGS2
GO:0048731	system development	P	3	56	5.88235	8.1042	UNDER	0.788323	1	F1P8T3, F1PP21, J9NVT1
GO:1901564	organonitrogen compound metabolic process	P	5	65	9.80392	9.40666	OVER	0.799732	1	C4MW55, F1PPB6, E2R2C3, J9NU05, Q0QEN2
GO:0060255	regulation of macromolecule metabolic process	P	5	68	9.80392	9.84081	OVER	0.807564	1	F1P8T3, F1P6H7, F1PP21, J9NVE9, F1PGS2
GO:0080090	regulation of primary metabolic process	P	4	71	7.84314	10.275	UNDER	0.807806	1	F1P8T3, F1PP21, J9NVE9, F1PGS2
GO:0048856	anatomical structure development	P	4	74	7.84314	10.7091	UNDER	0.809466	1	F1P8T3, F1P6H7, F1PP21, J9NVT1
GO:0044425	membrane part	C	6	79	11.7647	11.4327	OVER	0.816205	1	C4MW55, F1P8T3, J9NU17, F6X5M3, F1PGS2, Q0QEN2
GO:0065008	regulation of biological quality	P	6	80	11.7647	11.5774	OVER	0.818072	1	E2R5U8, F1P8T3, F1P8G0, F1PBL4, F1PGS2, J9NWJ5
GO:0009058	biosynthetic process	P	5	84	9.80392	12.1563	UNDER	0.821891	1	E2R7Z9, E2R2C3, J9NVE9, J9NU05, Q0QEN2
GO:0019222	regulation of metabolic process	P	5	88	9.80392	12.7352	UNDER	0.823228	1	F1P8T3, F1P6H7, F1PP21, J9NVE9, F1PGS2
GO:0043231	intracellular membrane-bounded organelle	C	7	115	13.7255	16.6425	UNDER	0.841863	1	J9PB81, E2RL75, E2RH23, F1PH83, F6X5M3, F1PGS2, Q0QEN2
GO:0032501	multicellular organismal process	P	8	126	15.6863	18.2344	UNDER	0.848421	1	F1P8T3, J9NU17, F1P8G0, F1PP21, F1PBL4, F1PGS2, J9NVT1, E2R357
GO:0043167	ion binding	F	12	162	23.5294	23.4443	OVER	0.861364	1	C4MW55, P60529, J9NU17, J9JHF7, P60524, J9NYN2, F1PYZ1, E2RH23, F1PP21, J9JHZ3, F1PBK6, Q0QEN2
GO:0044763	single-organism cellular process	P	20	293	39.2157	42.4023	UNDER	0.880411	1	C4MW55, F1PDY8, E2R5U8, F1P8T3, F1PPB6, F1P6H7, E2REU6, E2R2C3, F1P8G0, F1PP21, J9NVE9, F1PBL4, J9NU05, F1PGS2, J9NVT1, F1Q432, E2R357, J9NWJ5, F1PBK6, Q0QEN2
GO:0006807	nitrogen compound metabolic process	P	8	111	15.6863	16.0637	OVER	1	1	C4MW55, F1PPB6, E2RL75, E2R2C3, J9NVE9, J9NU05, F1PBK6, Q0QEN2
GO:0051239	regulation of multicellular organismal process	P	3	41	5.88235	5.93343	OVER	1	1	F1P8T3, F1PP21, F1PGS2
GO:0009056	catabolic process	P	4	60	7.84314	8.68307	UNDER	1	1	F1PPB6, E2R2C3, J9NVE9, J9NU05
GO:0048523	negative regulation of cellular process	P	3	53	5.88235	7.67004	UNDER	1	1	F1PP21, J9NVE9, F1PGS2
GO:0030154	cell differentiation	P	2	33	3.92157	4.77569	UNDER	1	1	F1P8T3, F1PP21
GO:0032553	ribonucleotide binding	F	2	40	3.92157	5.78871	UNDER	1	1	J9NU17, Q0QEN2
GO:0016070	RNA metabolic process	P	2	40	3.92157	5.78871	UNDER	1	1	E2RL75, J9NVE9
GO:0050793	regulation of developmental process	P	1	25	1.96078	3.61795	UNDER	1	1	F1P8T3
GO:0071840	cellular component organization or biogenesis	P	7	96	13.7255	13.8929	OVER	1	1	F1P8T3, F1P6H7, F1P8G0, F1PBL4, F1PGS2, F1Q432, E2R357
GO:0031323	regulation of cellular metabolic process	P	4	68	7.84314	9.84081	UNDER	1	1	F1P8T3, F1PP21, J9NVE9, F1PGS2
GO:0031988	membrane-bounded vesicle	C	4	68	7.84314	9.84081	UNDER	1	1	E2R7Z9, F6X5M3, F1PGS2, F1PBK6
GO:1901576	organic substance biosynthetic process	P	5	79	9.80392	11.4327	UNDER	1	1	E2R7Z9, E2R2C3, J9NVE9, J9NU05, Q0QEN2
GO:0048869	cellular developmental process	P	2	36	3.92157	5.20984	UNDER	1	1	F1P8T3, F1PP21
GO:0030554	adenyl nucleotide binding	F	2	31	3.92157	4.48625	UNDER	1	1	J9NU17, Q0QEN2
GO:0032559	adenyl ribonucleotide binding	F	2	31	3.92157	4.48625	UNDER	1	1	J9NU17, Q0QEN2
GO:0005524	ATP binding	F	2	31	3.92157	4.48625	UNDER	1	1	J9NU17, Q0QEN2
GO:0032879	regulation of localization	P	2	30	3.92157	4.34153	UNDER	1	1	F1P8T3, F1PGS2
GO:0048584	positive regulation of response to stimulus	P	3	52	5.88235	7.52533	UNDER	1	1	F1P8T3, J9NVE9, F1PGS2
GO:0040011	locomotion	P	1	23	1.96078	3.32851	UNDER	1	1	F1P8T3
GO:0005215	transporter activity	F	2	27	3.92157	3.90738	OVER	1	1	C4MW55, Q0QEN2
GO:0031982	vesicle	C	5	73	9.80392	10.5644	UNDER	1	1	E2R7Z9, F6X5M3, F1P6P2, F1PGS2, F1PBK6
GO:0006082	organic acid metabolic process	P	2	38	3.92157	5.49928	UNDER	1	1	E2R2C3, J9NU05
GO:0010468	regulation of gene expression	P	2	38	3.92157	5.49928	UNDER	1	1	F1PP21, J9NVE9
GO:0005975	carbohydrate metabolic process	P	2	34	3.92157	4.92041	UNDER	1	1	E2R2C3, J9NU05
GO:0048518	positive regulation of biological process	P	8	123	15.6863	17.8003	UNDER	1	1	F1PDY8, F1P8T3, F1P6H7, F1P8G0, F1PP21, J9NVE9, F1PBL4, F1PGS2
GO:0055114	oxidation-reduction process	P	2	32	3.92157	4.63097	UNDER	1	1	C4MW55, J9NU05
GO:0006629	lipid metabolic process	P	2	32	3.92157	4.63097	UNDER	1	1	E2R5U8, J9NVE9
GO:0016192	vesicle-mediated transport	P	2	37	3.92157	5.35456	UNDER	1	1	F6X5M3, F1PGS2
GO:0019438	aromatic compound biosynthetic process	P	2	37	3.92157	5.35456	UNDER	1	1	J9NVE9, Q0QEN2
GO:0043436	oxoacid metabolic process	P	2	37	3.92157	5.35456	UNDER	1	1	E2R2C3, J9NU05
GO:0018130	heterocycle biosynthetic process	P	2	37	3.92157	5.35456	UNDER	1	1	J9NVE9, Q0QEN2
GO:1901362	organic cyclic compound biosynthetic process	P	2	37	3.92157	5.35456	UNDER	1	1	J9NVE9, Q0QEN2
GO:0009653	anatomical structure morphogenesis	P	2	35	3.92157	5.06512	UNDER	1	1	F1P8T3, F1PP21
GO:0034654	nucleobase-containing compound biosynthetic process	P	2	35	3.92157	5.06512	UNDER	1	1	J9NVE9, Q0QEN2
GO:0019752	carboxylic acid metabolic process	P	2	35	3.92157	5.06512	UNDER	1	1	E2R2C3, J9NU05
GO:0044248	cellular catabolic process	P	2	35	3.92157	5.06512	UNDER	1	1	F1PPB6, J9NVE9
GO:0032555	purine ribonucleotide binding	F	2	39	3.92157	5.64399	UNDER	1	1	J9NU17, Q0QEN2
GO:0032550	purine ribonucleoside binding	F	2	39	3.92157	5.64399	UNDER	1	1	J9NU17, Q0QEN2
GO:0032549	ribonucleoside binding	F	2	39	3.92157	5.64399	UNDER	1	1	J9NU17, Q0QEN2
GO:0017076	purine nucleotide binding	F	2	39	3.92157	5.64399	UNDER	1	1	J9NU17, Q0QEN2
GO:0035639	purine ribonucleoside triphosphate binding	F	2	39	3.92157	5.64399	UNDER	1	1	J9NU17, Q0QEN2
GO:0001883	purine nucleoside binding	F	2	39	3.92157	5.64399	UNDER	1	1	J9NU17, Q0QEN2
GO:0001882	nucleoside binding	F	2	39	3.92157	5.64399	UNDER	1	1	J9NU17, Q0QEN2
GO:0070887	cellular response to chemical stimulus	P	1	24	1.96078	3.47323	UNDER	1	1	F1PGC3
GO:0006928	movement of cell or subcellular component	P	1	24	1.96078	3.47323	UNDER	1	1	F1P8T3
GO:0009892	negative regulation of metabolic process	P	1	24	1.96078	3.47323	UNDER	1	1	J9NVE9
GO, Gene Ontology; P, biology process; F, molecular function; C, cellular component; #Diff, proteins associated with the GO term in differentially expressed proteins; #Ref, proteins associated with the GO term in the all identified proteins; %Diff, rate of proteins associated with the GO term in the differentially expressed proteins; %Ref, rate of proteins associated with the GO term in all ident…

## Sheet: 2h
GO-ID	Term	Category	#Diff	#Ref	%Diff	%Ref	P-Value	FDR	Over/Under	TestSeqs
GO:0015671	oxygen transport	P	5	8	9.25926	1.15774	9.51e-05	0.102	OVER	"P60529, J9JHF7, P60524, F1P8V6, J9JHZ3"
GO:0015669	gas transport	P	5	8	9.25926	1.15774	9.51e-05	0.102	OVER	"P60529, J9JHF7, P60524, F1P8V6, J9JHZ3"
GO:0019825	oxygen binding	F	5	8	9.25926	1.15774	9.51e-05	0.102	OVER	"P60529, J9JHF7, P60524, F1P8V6, J9JHZ3"
GO:0005577	fibrinogen complex	C	4	5	7.40741	0.723589	0.000137	0.11	OVER	"F1P8G0, F1PBI6, F1PBL4, F1PGS2"
GO:0043234	protein complex	C	19	118	35.1852	17.0767	0.000389	0.187	OVER	"P52784, F1PTS8, E2QSF4, P60529, J9NTJ3, J9NU17, J9JHF7, P60524, F1P8G0, F1PBI6, J9P716, F1PBL4, E2RI13, F1PGS2, J9JHZ3, E2QW34, E2RI99, C0LQL0, Q0QEN2"
GO:0060090	"binding, bridging"	F	3	3	5.55556	0.434153	0.000406	0.187	OVER	"F1P8G0, F1PBL4, F1PGS2"
GO:0030674	"protein binding, bridging"	F	3	3	5.55556	0.434153	0.000406	0.187	OVER	"F1P8G0, F1PBL4, F1PGS2"
GO:0020037	heme binding	F	5	11	9.25926	1.5919	0.000658	0.265	OVER	"P60529, J9JHF7, P60524, F1P8V6, J9JHZ3"
GO:0046906	tetrapyrrole binding	F	5	12	9.25926	1.73661	0.00106	0.381	OVER	"P60529, J9JHF7, P60524, F1P8V6, J9JHZ3"
GO:0010035	response to inorganic substance	P	3	4	5.55556	0.578871	0.00154	0.438	OVER	"F1PCG4, F1PBI6, F1PGS2"
GO:0005833	hemoglobin complex	C	4	8	7.40741	1.15774	0.00161	0.438	OVER	"P60529, J9JHF7, P60524, J9JHZ3"
GO:0044445	cytosolic part	C	5	13	9.25926	1.88133	0.00163	0.438	OVER	"P52784, P60529, J9JHF7, P60524, J9JHZ3"
GO:0032991	macromolecular complex	C	19	137	35.1852	19.8263	0.0033	0.658	OVER	"P52784, F1PTS8, E2QSF4, P60529, J9NTJ3, J9NU17, J9JHF7, P60524, F1P8G0, F1PBI6, J9P716, F1PBL4, E2RI13, F1PGS2, J9JHZ3, E2QW34, E2RI99, C0LQL0, Q0QEN2"
GO:0072577	endothelial cell apoptotic process	P	2	2	3.7037	0.289436	0.00559	0.658	OVER	"F1PBI6, F1PGS2"
GO:0008625	extrinsic apoptotic signaling pathway via death domain receptors	P	2	2	3.7037	0.289436	0.00559	0.658	OVER	"F1PBI6, F1PGS2"
GO:1902041	regulation of extrinsic apoptotic signaling pathway via death domain receptors	P	2	2	3.7037	0.289436	0.00559	0.658	OVER	"F1PBI6, F1PGS2"
GO:0051592	response to calcium ion	P	2	2	3.7037	0.289436	0.00559	0.658	OVER	"F1PBI6, F1PGS2"
GO:2000351	regulation of endothelial cell apoptotic process	P	2	2	3.7037	0.289436	0.00559	0.658	OVER	"F1PBI6, F1PGS2"
GO:0097191	extrinsic apoptotic signaling pathway	P	2	2	3.7037	0.289436	0.00559	0.658	OVER	"F1PBI6, F1PGS2"
GO:0016328	lateral plasma membrane	C	2	2	3.7037	0.289436	0.00559	0.658	OVER	"J9NTJ3, J9NU17"
GO:2001237	negative regulation of extrinsic apoptotic signaling pathway	P	2	2	3.7037	0.289436	0.00559	0.658	OVER	"F1PBI6, F1PGS2"
GO:2001236	regulation of extrinsic apoptotic signaling pathway	P	2	2	3.7037	0.289436	0.00559	0.658	OVER	"F1PBI6, F1PGS2"
GO:2001234	negative regulation of apoptotic signaling pathway	P	2	2	3.7037	0.289436	0.00559	0.658	OVER	"F1PBI6, F1PGS2"
GO:0031091	platelet alpha granule	C	2	2	3.7037	0.289436	0.00559	0.658	OVER	"F1PBI6, F1PGS2"
GO:0001775	cell activation	P	4	11	7.40741	1.5919	0.0064	0.658	OVER	"F1P8G0, F1PBI6, F1PBL4, F1PGS2"
GO:0043410	positive regulation of MAPK cascade	P	3	6	5.55556	0.868307	0.00689	0.658	OVER	"F1PBI6, J9NVE9, F1PGS2"
GO:0043408	regulation of MAPK cascade	P	3	6	5.55556	0.868307	0.00689	0.658	OVER	"F1PBI6, J9NVE9, F1PGS2"
GO:0030168	platelet activation	P	3	6	5.55556	0.868307	0.00689	0.658	OVER	"F1P8G0, F1PBL4, F1PGS2"
GO:0005506	iron ion binding	F	4	12	7.40741	1.73661	0.00907	0.658	OVER	"P60529, J9JHF7, P60524, J9JHZ3"
GO:0051258	protein polymerization	P	3	7	5.55556	1.01302	0.0114	0.658	OVER	"F1P8G0, F1PBL4, F1PGS2"
GO:0043623	cellular protein complex assembly	P	3	7	5.55556	1.01302	0.0114	0.658	OVER	"F1P8G0, F1PBL4, F1PGS2"
GO:0034622	cellular macromolecular complex assembly	P	3	7	5.55556	1.01302	0.0114	0.658	OVER	"F1P8G0, F1PBL4, F1PGS2"
GO:1901363	heterocyclic compound binding	F	14	98	25.9259	14.1823	0.0115	0.658	OVER	"P52784, E2QSF4, P60529, J9NU17, J9JHF7, P60524, E2RIG8, E2R5H4, F1P8V6, J9P716, J9JHZ3, E2RI99, F1PGC3, Q0QEN2"
GO:0097159	organic cyclic compound binding	F	14	99	25.9259	14.3271	0.0122	0.658	OVER	"P52784, E2QSF4, P60529, J9NU17, J9JHF7, P60524, E2RIG8, E2R5H4, F1P8V6, J9P716, J9JHZ3, E2RI99, F1PGC3, Q0QEN2"
GO:0031406	carboxylic acid binding	F	2	3	3.7037	0.434153	0.016	0.658	OVER	"F1PBI6, C0LQL0"
GO:0010038	response to metal ion	P	2	3	3.7037	0.434153	0.016	0.658	OVER	"F1PBI6, F1PGS2"
GO:0097285	cell-type specific apoptotic process	P	2	3	3.7037	0.434153	0.016	0.658	OVER	"F1PBI6, F1PGS2"
GO:1904035	regulation of epithelial cell apoptotic process	P	2	3	3.7037	0.434153	0.016	0.658	OVER	"F1PBI6, F1PGS2"
GO:1904019	epithelial cell apoptotic process	P	2	3	3.7037	0.434153	0.016	0.658	OVER	"F1PBI6, F1PGS2"
GO:0043177	organic acid binding	F	2	3	3.7037	0.434153	0.016	0.658	OVER	"F1PBI6, C0LQL0"
GO:0009897	external side of plasma membrane	C	2	3	3.7037	0.434153	0.016	0.658	OVER	"F1PBI6, F1PGS2"
GO:0032561	guanyl ribonucleotide binding	F	3	8	5.55556	1.15774	0.0173	0.658	OVER	"E2QSF4, E2RIG8, J9P716"
GO:1902533	positive regulation of intracellular signal transduction	P	3	8	5.55556	1.15774	0.0173	0.658	OVER	"F1PBI6, J9NVE9, F1PGS2"
GO:0001934	positive regulation of protein phosphorylation	P	3	8	5.55556	1.15774	0.0173	0.658	OVER	"F1PBI6, J9NVE9, F1PGS2"
GO:0023014	signal transduction by protein phosphorylation	P	3	8	5.55556	1.15774	0.0173	0.658	OVER	"F1PBI6, J9NVE9, F1PGS2"
GO:0000165	MAPK cascade	P	3	8	5.55556	1.15774	0.0173	0.658	OVER	"F1PBI6, J9NVE9, F1PGS2"
GO:0005525	GTP binding	F	3	8	5.55556	1.15774	0.0173	0.658	OVER	"E2QSF4, E2RIG8, J9P716"
GO:0019001	guanyl nucleotide binding	F	3	8	5.55556	1.15774	0.0173	0.658	OVER	"E2QSF4, E2RIG8, J9P716"
GO:0009611	response to wounding	P	6	30	11.1111	4.34153	0.0199	0.658	OVER	"F1P8G0, F1PBI6, F1PBL4, F1PGS2, F5XVB0, C0LQL0"
GO:0032555	purine ribonucleotide binding	F	7	39	12.963	5.64399	0.0214	0.658	OVER	"P52784, E2QSF4, J9NU17, E2RIG8, E2R5H4, J9P716, Q0QEN2"
GO:0032550	purine ribonucleoside binding	F	7	39	12.963	5.64399	0.0214	0.658	OVER	"P52784, E2QSF4, J9NU17, E2RIG8, E2R5H4, J9P716, Q0QEN2"
GO:0032549	ribonucleoside binding	F	7	39	12.963	5.64399	0.0214	0.658	OVER	"P52784, E2QSF4, J9NU17, E2RIG8, E2R5H4, J9P716, Q0QEN2"
GO:0017076	purine nucleotide binding	F	7	39	12.963	5.64399	0.0214	0.658	OVER	"P52784, E2QSF4, J9NU17, E2RIG8, E2R5H4, J9P716, Q0QEN2"
GO:0035639	purine ribonucleoside triphosphate binding	F	7	39	12.963	5.64399	0.0214	0.658	OVER	"P52784, E2QSF4, J9NU17, E2RIG8, E2R5H4, J9P716, Q0QEN2"
GO:0001883	purine nucleoside binding	F	7	39	12.963	5.64399	0.0214	0.658	OVER	"P52784, E2QSF4, J9NU17, E2RIG8, E2R5H4, J9P716, Q0QEN2"
GO:0001882	nucleoside binding	F	7	39	12.963	5.64399	0.0214	0.658	OVER	"P52784, E2QSF4, J9NU17, E2RIG8, E2R5H4, J9P716, Q0QEN2"
GO:0046914	transition metal ion binding	F	8	48	14.8148	6.94645	0.0215	0.658	OVER	"P60529, J9JHF7, P60524, J9NYN2, E2RH23, J9JHZ3, F1PBK6, C0LQL0"
GO:0007596	blood coagulation	P	5	23	9.25926	3.32851	0.0238	0.658	OVER	"F1P8G0, F1PBI6, F1PBL4, F1PGS2, F5XVB0"
GO:0050817	coagulation	P	5	23	9.25926	3.32851	0.0238	0.658	OVER	"F1P8G0, F1PBI6, F1PBL4, F1PGS2, F5XVB0"
GO:0032553	ribonucleotide binding	F	7	40	12.963	5.78871	0.0245	0.658	OVER	"P52784, E2QSF4, J9NU17, E2RIG8, E2R5H4, J9P716, Q0QEN2"
GO:0042327	positive regulation of phosphorylation	P	3	9	5.55556	1.30246	0.0246	0.658	OVER	"F1PBI6, J9NVE9, F1PGS2"
GO:0036094	small molecule binding	F	9	55	16.6667	7.95948	0.0276	0.658	OVER	"P52784, E2QSF4, J9NU17, E2RIG8, E2R5H4, F1PBI6, J9P716, C0LQL0, Q0QEN2"
GO:0007599	hemostasis	P	5	24	9.25926	3.47323	0.0284	0.658	OVER	"F1P8G0, F1PBI6, F1PBL4, F1PGS2, F5XVB0"
GO:0043168	anion binding	F	9	57	16.6667	8.24891	0.03	0.658	OVER	"P52784, E2QSF4, J9NU17, E2RIG8, E2R5H4, F1PBI6, J9P716, C0LQL0, Q0QEN2"
GO:0070374	positive regulation of ERK1 and ERK2 cascade	P	2	4	3.7037	0.578871	0.0304	0.658	OVER	"J9NVE9, F1PGS2"
GO:0070372	regulation of ERK1 and ERK2 cascade	P	2	4	3.7037	0.578871	0.0304	0.658	OVER	"J9NVE9, F1PGS2"
GO:0031639	plasminogen activation	P	2	4	3.7037	0.578871	0.0304	0.658	OVER	"F1PBI6, F1PGS2"
GO:0031638	zymogen activation	P	2	4	3.7037	0.578871	0.0304	0.658	OVER	"F1PBI6, F1PGS2"
GO:0098590	plasma membrane region	C	2	4	3.7037	0.578871	0.0304	0.658	OVER	"J9NTJ3, J9NU17"
GO:0098552	side of membrane	C	2	4	3.7037	0.578871	0.0304	0.658	OVER	"F1PBI6, F1PGS2"
GO:0005200	structural constituent of cytoskeleton	F	2	4	3.7037	0.578871	0.0304	0.658	OVER	"E2QSF4, J9P716"
GO:0006887	exocytosis	P	2	4	3.7037	0.578871	0.0304	0.658	OVER	"F1PBI6, F1PGS2"
GO:0018193	peptidyl-amino acid modification	P	2	4	3.7037	0.578871	0.0304	0.658	OVER	"J9NVE9, Q9MZD3"
GO:0030141	secretory granule	C	2	4	3.7037	0.578871	0.0304	0.658	OVER	"F1PBI6, F1PGS2"
GO:0097190	apoptotic signaling pathway	P	2	4	3.7037	0.578871	0.0304	0.658	OVER	"F1PBI6, F1PGS2"
GO:0050839	cell adhesion molecule binding	F	2	4	3.7037	0.578871	0.0304	0.658	OVER	"F1PBI6, F1PGS2"
GO:2001233	regulation of apoptotic signaling pathway	P	2	4	3.7037	0.578871	0.0304	0.658	OVER	"F1PBI6, F1PGS2"
GO:0005576	extracellular region	C	10	230	18.5185	33.2851	0.0304	0.658	UNDER	"F1P8G0, F1PBI6, J9NVE9, F1PBL4, F1PGS2, F5XVB0, F1Q432, E2RQF8, E2RRU2, F1PBK6"
GO:0001932	regulation of protein phosphorylation	P	3	10	5.55556	1.44718	0.0333	0.658	OVER	"F1PBI6, J9NVE9, F1PGS2"
GO:0010562	positive regulation of phosphorus metabolic process	P	3	10	5.55556	1.44718	0.0333	0.658	OVER	"F1PBI6, J9NVE9, F1PGS2"
GO:0045937	positive regulation of phosphate metabolic process	P	3	10	5.55556	1.44718	0.0333	0.658	OVER	"F1PBI6, J9NVE9, F1PGS2"
GO:0007017	microtubule-based process	P	3	10	5.55556	1.44718	0.0333	0.658	OVER	"E2QSF4, J9NTJ3, J9P716"
GO:0005102	receptor binding	F	5	25	9.25926	3.61795	0.0335	0.658	OVER	"F1P8G0, F1PBI6, F1PBL4, F1PGS2, C0LQL0"
GO:0042060	wound healing	P	5	25	9.25926	3.61795	0.0335	0.658	OVER	"F1P8G0, F1PBI6, F1PBL4, F1PGS2, F5XVB0"
GO:0005622	intracellular	C	26	250	48.1481	36.1795	0.0351	0.658	OVER	"J9PB81, P52784, F1PTS8, E2QSF4, F1PPB6, P60529, J9P6T6, J9NTJ3, J9NU17, J9JHF7, P60524, F1PN38, E2RIG8, E2RH23, F1PBI6, J9P716, J9NWQ5, E2RI13, Q9MZD3, F1PGS2, J9JHZ3, F1PBK6, E2QW34, E2RI99, C0LQL0, Q0QEN2"
GO:0010604	positive regulation of macromolecule metabolic process	P	5	26	9.25926	3.76266	0.0391	0.658	OVER	"F1PBI6, J9NVE9, E2RI13, F1PGS2, E2RI99"
GO:0000166	nucleotide binding	F	7	44	12.963	6.36758	0.0396	0.658	OVER	"P52784, E2QSF4, J9NU17, E2RIG8, E2R5H4, J9P716, Q0QEN2"
GO:1901265	nucleoside phosphate binding	F	7	44	12.963	6.36758	0.0396	0.658	OVER	"P52784, E2QSF4, J9NU17, E2RIG8, E2R5H4, J9P716, Q0QEN2"
GO:0071822	protein complex subunit organization	P	4	18	7.40741	2.60492	0.0399	0.658	OVER	"F1P8G0, F1PBL4, F1PGS2, F1Q432"
GO:0051707	response to other organism	P	3	11	5.55556	1.5919	0.0434	0.658	OVER	"J9PB81, F1PGS2, F1PGC3"
GO:0009607	response to biotic stimulus	P	3	11	5.55556	1.5919	0.0434	0.658	OVER	"J9PB81, F1PGS2, F1PGC3"
GO:0042325	regulation of phosphorylation	P	3	11	5.55556	1.5919	0.0434	0.658	OVER	"F1PBI6, J9NVE9, F1PGS2"
GO:0010647	positive regulation of cell communication	P	3	11	5.55556	1.5919	0.0434	0.658	OVER	"F1PBI6, J9NVE9, F1PGS2"
GO:0023056	positive regulation of signaling	P	3	11	5.55556	1.5919	0.0434	0.658	OVER	"F1PBI6, J9NVE9, F1PGS2"
GO:0043207	response to external biotic stimulus	P	3	11	5.55556	1.5919	0.0434	0.658	OVER	"J9PB81, F1PGS2, F1PGC3"
GO:0009967	positive regulation of signal transduction	P	3	11	5.55556	1.5919	0.0434	0.658	OVER	"F1PBI6, J9NVE9, F1PGS2"
GO:0005829	cytosol	C	5	27	9.25926	3.90738	0.0453	0.658	OVER	"P52784, P60529, J9JHF7, P60524, J9JHZ3"
GO:0050878	regulation of body fluid levels	P	5	27	9.25926	3.90738	0.0453	0.658	OVER	"F1P8G0, F1PBI6, F1PBL4, F1PGS2, F5XVB0"
GO:0097367	carbohydrate derivative binding	F	8	51	14.8148	7.38061	0.0459	0.658	OVER	"P52784, E2QSF4, J9NU17, E2RIG8, E2R5H4, F1PBI6, J9P716, Q0QEN2"
GO:0044430	cytoskeletal part	C	6	36	11.1111	5.20984	0.0459	0.658	OVER	"F1PTS8, E2QSF4, J9NTJ3, J9NU17, J9P716, C0LQL0"
GO:0032403	protein complex binding	F	4	19	7.40741	2.74964	0.0478	0.658	OVER	"J9NTJ3, F1PBI6, F5XVB0, C0LQL0"
GO:0044424	intracellular part	C	25	242	46.2963	35.0217	0.0481	0.658	OVER	"J9PB81, P52784, F1PTS8, E2QSF4, F1PPB6, P60529, J9P6T6, J9NTJ3, J9NU17, J9JHF7, P60524, F1PN38, E2RH23, F1PBI6, J9P716, J9NWQ5, E2RI13, Q9MZD3, F1PGS2, J9JHZ3, F1PBK6, E2QW34, E2RI99, C0LQL0, Q0QEN2"
GO:0070371	ERK1 and ERK2 cascade	P	2	5	3.7037	0.723589	0.0482	0.658	OVER	"J9NVE9, F1PGS2"
GO:0046903	secretion	P	2	5	3.7037	0.723589	0.0482	0.658	OVER	"F1PBI6, F1PGS2"
GO:0008017	microtubule binding	F	2	5	3.7037	0.723589	0.0482	0.658	OVER	"J9NTJ3, C0LQL0"
GO:0098589	membrane region	C	2	5	3.7037	0.723589	0.0482	0.658	OVER	"J9NTJ3, J9NU17"
GO:0051604	protein maturation	P	2	5	3.7037	0.723589	0.0482	0.658	OVER	"F1PBI6, F1PGS2"
GO:0010648	negative regulation of cell communication	P	2	5	3.7037	0.723589	0.0482	0.658	OVER	"F1PBI6, F1PGS2"
GO:0023057	negative regulation of signaling	P	2	5	3.7037	0.723589	0.0482	0.658	OVER	"F1PBI6, F1PGS2"
GO:0042730	fibrinolysis	P	2	5	3.7037	0.723589	0.0482	0.658	OVER	"F1PBI6, F1PGS2"
GO:0032940	secretion by cell	P	2	5	3.7037	0.723589	0.0482	0.658	OVER	"F1PBI6, F1PGS2"
GO:0016485	protein processing	P	2	5	3.7037	0.723589	0.0482	0.658	OVER	"F1PBI6, F1PGS2"
GO:0009968	negative regulation of signal transduction	P	2	5	3.7037	0.723589	0.0482	0.658	OVER	"F1PBI6, F1PGS2"
GO:0003924	GTPase activity	F	2	5	3.7037	0.723589	0.0482	0.658	OVER	"E2QSF4, J9P716"
GO:0043069	negative regulation of programmed cell death	P	2	5	3.7037	0.723589	0.0482	0.658	OVER	"F1PBI6, F1PGS2"
GO:0043066	negative regulation of apoptotic process	P	2	5	3.7037	0.723589	0.0482	0.658	OVER	"F1PBI6, F1PGS2"
GO:0031325	positive regulation of cellular metabolic process	P	5	28	9.25926	4.0521	0.052	0.658	OVER	"F1PBI6, J9NVE9, E2RI13, F1PGS2, E2RI99"
GO:0006954	inflammatory response	P	3	12	5.55556	1.73661	0.0548	0.658	OVER	"F1PBI6, J9NVE9, C0LQL0"
GO:0031401	positive regulation of protein modification process	P	3	12	5.55556	1.73661	0.0548	0.658	OVER	"F1PBI6, J9NVE9, F1PGS2"
GO:1902531	regulation of intracellular signal transduction	P	3	12	5.55556	1.73661	0.0548	0.658	OVER	"F1PBI6, J9NVE9, F1PGS2"
GO:0042127	regulation of cell proliferation	P	3	12	5.55556	1.73661	0.0548	0.658	OVER	"F1PF31, F1PBI6, E2RI99"
GO:0006468	protein phosphorylation	P	4	20	7.40741	2.89436	0.0565	0.658	OVER	"E2R5H4, F1PBI6, J9NVE9, F1PGS2"
GO:0051704	multi-organism process	P	4	20	7.40741	2.89436	0.0565	0.658	OVER	"J9PB81, Q9MZD3, F1PGS2, F1PGC3"
GO:0044877	macromolecular complex binding	F	4	20	7.40741	2.89436	0.0565	0.658	OVER	"J9NTJ3, F1PBI6, F5XVB0, C0LQL0"
GO:0044464	cell part	C	30	308	55.5556	44.5731	0.057	0.658	OVER	"J9PB81, F1PDY8, P52784, F1PTS8, E2QSF4, F1PPB6, P60529, J9P6T6, J9NTJ3, J9NU17, J9JHF7, P60524, F1PN38, F1PE38, E2RIG8, E2RH23, F1P8G0, F1PBI6, J9P716, F1PBL4, J9NWQ5, E2RI13, Q9MZD3, F1PGS2, J9JHZ3, F1PBK6, E2QW34, E2RI99, C0LQL0, Q0QEN2"
GO:0005623	cell	C	30	310	55.5556	44.8625	0.0582	0.658	OVER	"J9PB81, F1PDY8, P52784, F1PTS8, E2QSF4, F1PPB6, P60529, J9P6T6, J9NTJ3, J9NU17, J9JHF7, P60524, F1PN38, F1PE38, E2RIG8, E2RH23, F1P8G0, F1PBI6, J9P716, F1PBL4, J9NWQ5, E2RI13, Q9MZD3, F1PGS2, J9JHZ3, F1PBK6, E2QW34, E2RI99, C0LQL0, Q0QEN2"
GO:0043167	ion binding	F	18	162	33.3333	23.4443	0.0598	0.658	OVER	"P52784, E2QSF4, P60529, J9NU17, J9JHF7, P60524, F1PE38, J9NYN2, E2RIG8, E2RH23, E2R5H4, F1PBI6, J9P716, J9NWQ5, J9JHZ3, F1PBK6, C0LQL0, Q0QEN2"
GO:0098772	molecular function regulator	F	0	41	0	5.93343	0.064	0.658	UNDER
GO:0022610	biological adhesion	P	5	30	9.25926	4.34153	0.0672	0.658	OVER	"F1PF31, F1PE38, F1PBI6, F1PGS2, F5XVB0"
GO:0007155	cell adhesion	P	5	30	9.25926	4.34153	0.0672	0.658	OVER	"F1PF31, F1PE38, F1PBI6, F1PGS2, F5XVB0"
GO:1901700	response to oxygen-containing compound	P	3	13	5.55556	1.88133	0.0675	0.658	OVER	"F1PCG4, F1PBI6, E2RI99"
GO:0019220	regulation of phosphate metabolic process	P	3	13	5.55556	1.88133	0.0675	0.658	OVER	"F1PBI6, J9NVE9, F1PGS2"
GO:0061045	negative regulation of wound healing	P	2	6	3.7037	0.868307	0.0688	0.658	OVER	"F1PBI6, F1PGS2"
GO:1900047	negative regulation of hemostasis	P	2	6	3.7037	0.868307	0.0688	0.658	OVER	"F1PBI6, F1PGS2"
GO:0060548	negative regulation of cell death	P	2	6	3.7037	0.868307	0.0688	0.658	OVER	"F1PBI6, F1PGS2"
GO:0015631	tubulin binding	F	2	6	3.7037	0.868307	0.0688	0.658	OVER	"J9NTJ3, C0LQL0"
GO:0030195	negative regulation of blood coagulation	P	2	6	3.7037	0.868307	0.0688	0.658	OVER	"F1PBI6, F1PGS2"
GO:0007160	cell-matrix adhesion	P	2	6	3.7037	0.868307	0.0688	0.658	OVER	"F1PBI6, F1PGS2"
GO:0045298	tubulin complex	C	2	6	3.7037	0.868307	0.0688	0.658	OVER	"J9NTJ3, C0LQL0"
GO:2000117	negative regulation of cysteine-type endopeptidase activity	P	1	1	1.85185	0.144718	0.0754	0.658	OVER	F1PBI6
GO:0034333	adherens junction assembly	P	1	1	1.85185	0.144718	0.0754	0.658	OVER	F1PBI6
GO:0034332	adherens junction organization	P	1	1	1.85185	0.144718	0.0754	0.658	OVER	F1PBI6
GO:0007610	behavior	P	1	1	1.85185	0.144718	0.0754	0.658	OVER	F1PBI6
GO:1903392	negative regulation of adherens junction organization	P	1	1	1.85185	0.144718	0.0754	0.658	OVER	F1PBI6
GO:1903391	regulation of adherens junction organization	P	1	1	1.85185	0.144718	0.0754	0.658	OVER	F1PBI6
GO:0046942	carboxylic acid transport	P	1	1	1.85185	0.144718	0.0754	0.658	OVER	F1PBI6
GO:0043652	engulfment of apoptotic cell	P	1	1	1.85185	0.144718	0.0754	0.658	OVER	F1PBI6
GO:0071451	cellular response to superoxide	P	1	1	1.85185	0.144718	0.0754	0.658	OVER	F1PCG4
GO:0071450	cellular response to oxygen radical	P	1	1	1.85185	0.144718	0.0754	0.658	OVER	F1PCG4
GO:0015849	organic acid transport	P	1	1	1.85185	0.144718	0.0754	0.658	OVER	F1PBI6
GO:0015833	peptide transport	P	1	1	1.85185	0.144718	0.0754	0.658	OVER	F1PGS2
GO:0042535	positive regulation of tumor necrosis factor biosynthetic process	P	1	1	1.85185	0.144718	0.0754	0.658	OVER	F1PBI6
GO:0042534	regulation of tumor necrosis factor biosynthetic process	P	1	1	1.85185	0.144718	0.0754	0.658	OVER	F1PBI6
GO:0042533	tumor necrosis factor biosynthetic process	P	1	1	1.85185	0.144718	0.0754	0.658	OVER	F1PBI6
GO:0009187	cyclic nucleotide metabolic process	P	1	1	1.85185	0.144718	0.0754	0.658	OVER	F1PBI6
GO:0002793	positive regulation of peptide secretion	P	1	1	1.85185	0.144718	0.0754	0.658	OVER	F1PGS2
GO:0002791	regulation of peptide secretion	P	1	1	1.85185	0.144718	0.0754	0.658	OVER	F1PGS2
GO:0002790	peptide secretion	P	1	1	1.85185	0.144718	0.0754	0.658	OVER	F1PGS2
GO:0032760	positive regulation of tumor necrosis factor production	P	1	1	1.85185	0.144718	0.0754	0.658	OVER	F1PBI6
GO:0009166	nucleotide catabolic process	P	1	1	1.85185	0.144718	0.0754	0.658	OVER	F1PPB6
GO:0051895	negative regulation of focal adhesion assembly	P	1	1	1.85185	0.144718	0.0754	0.658	OVER	F1PBI6
GO:0051893	regulation of focal adhesion assembly	P	1	1	1.85185	0.144718	0.0754	0.658	OVER	F1PBI6
GO:0050795	regulation of behavior	P	1	1	1.85185	0.144718	0.0754	0.658	OVER	F1PBI6
GO:0010324	membrane invagination	P	1	1	1.85185	0.144718	0.0754	0.658	OVER	F1PBI6
GO:0045197	establishment or maintenance of epithelial cell apical/basal polarity	P	1	1	1.85185	0.144718	0.0754	0.658	OVER	J9NTJ3
GO:0030511	positive regulation of transforming growth factor beta receptor signaling pathway	P	1	1	1.85185	0.144718	0.0754	0.658	OVER	F1PBI6
GO:1903960	negative regulation of anion transmembrane transport	P	1	1	1.85185	0.144718	0.0754	0.658	OVER	F1PBI6
GO:0098656	anion transmembrane transport	P	1	1	1.85185	0.144718	0.0754	0.658	OVER	F1PBI6
GO:1903959	regulation of anion transmembrane transport	P	1	1	1.85185	0.144718	0.0754	0.658	OVER	F1PBI6
GO:0050714	positive regulation of protein secretion	P	1	1	1.85185	0.144718	0.0754	0.658	OVER	F1PGS2
GO:0044070	regulation of anion transport	P	1	1	1.85185	0.144718	0.0754	0.658	OVER	F1PBI6
GO:0044057	regulation of system process	P	1	1	1.85185	0.144718	0.0754	0.658	OVER	F1PGS2
GO:0006493	protein O-linked glycosylation	P	1	1	1.85185	0.144718	0.0754	0.658	OVER	F1PBI6
GO:0034284	response to monosaccharide	P	1	1	1.85185	0.144718	0.0754	0.658	OVER	F1PBI6
GO:0009749	response to glucose	P	1	1	1.85185	0.144718	0.0754	0.658	OVER	F1PBI6
GO:0009746	response to hexose	P	1	1	1.85185	0.144718	0.0754	0.658	OVER	F1PBI6
GO:0009743	response to carbohydrate	P	1	1	1.85185	0.144718	0.0754	0.658	OVER	F1PBI6
GO:0034250	positive regulation of cellular amide metabolic process	P	1	1	1.85185	0.144718	0.0754	0.658	OVER	F1PBI6
GO:0046887	positive regulation of hormone secretion	P	1	1	1.85185	0.144718	0.0754	0.658	OVER	F1PGS2
GO:0046883	regulation of hormone secretion	P	1	1	1.85185	0.144718	0.0754	0.658	OVER	F1PGS2
GO:0046879	hormone secretion	P	1	1	1.85185	0.144718	0.0754	0.658	OVER	F1PGS2
GO:0033138	positive regulation of peptidyl-serine phosphorylation	P	1	1	1.85185	0.144718	0.0754	0.658	OVER	J9NVE9
GO:0033135	regulation of peptidyl-serine phosphorylation	P	1	1	1.85185	0.144718	0.0754	0.658	OVER	J9NVE9
GO:0032026	response to magnesium ion	P	1	1	1.85185	0.144718	0.0754	0.658	OVER	F1PBI6
GO:0002040	sprouting angiogenesis	P	1	1	1.85185	0.144718	0.0754	0.658	OVER	F1PBI6
GO:0016859	cis-trans isomerase activity	F	1	1	1.85185	0.144718	0.0754	0.658	OVER	Q9MZD3
GO:0045727	positive regulation of translation	P	1	1	1.85185	0.144718	0.0754	0.658	OVER	F1PBI6
GO:0043537	negative regulation of blood vessel endothelial cell migration	P	1	1	1.85185	0.144718	0.0754	0.658	OVER	F1PBI6
GO:0043536	positive regulation of blood vessel endothelial cell migration	P	1	1	1.85185	0.144718	0.0754	0.658	OVER	F1PBI6
GO:0032695	negative regulation of interleukin-12 production	P	1	1	1.85185	0.144718	0.0754	0.658	OVER	F1PBI6
GO:0043535	regulation of blood vessel endothelial cell migration	P	1	1	1.85185	0.144718	0.0754	0.658	OVER	F1PBI6
GO:0032680	regulation of tumor necrosis factor production	P	1	1	1.85185	0.144718	0.0754	0.658	OVER	F1PBI6
GO:0015718	monocarboxylic acid transport	P	1	1	1.85185	0.144718	0.0754	0.658	OVER	F1PBI6
GO:0032655	regulation of interleukin-12 production	P	1	1	1.85185	0.144718	0.0754	0.658	OVER	F1PBI6
GO:0003755	peptidyl-prolyl cis-trans isomerase activity	F	1	1	1.85185	0.144718	0.0754	0.658	OVER	Q9MZD3
GO:0032640	tumor necrosis factor production	P	1	1	1.85185	0.144718	0.0754	0.658	OVER	F1PBI6
GO:0001578	microtubule bundle formation	P	1	1	1.85185	0.144718	0.0754	0.658	OVER	J9NTJ3
GO:0050680	negative regulation of epithelial cell proliferation	P	1	1	1.85185	0.144718	0.0754	0.658	OVER	F1PBI6
GO:0050678	regulation of epithelial cell proliferation	P	1	1	1.85185	0.144718	0.0754	0.658	OVER	F1PBI6
GO:0050673	epithelial cell proliferation	P	1	1	1.85185	0.144718	0.0754	0.658	OVER	F1PBI6
GO:0005903	brush border	C	1	1	1.85185	0.144718	0.0754	0.658	OVER	J9NU17
GO:0005902	microvillus	C	1	1	1.85185	0.144718	0.0754	0.658	OVER	J9NU17
GO:0032615	interleukin-12 production	P	1	1	1.85185	0.144718	0.0754	0.658	OVER	F1PBI6
GO:0002605	negative regulation of dendritic cell antigen processing and presentation	P	1	1	1.85185	0.144718	0.0754	0.658	OVER	F1PBI6
GO:0002604	regulation of dendritic cell antigen processing and presentation	P	1	1	1.85185	0.144718	0.0754	0.658	OVER	F1PBI6
GO:1903846	positive regulation of cellular response to transforming growth factor beta stimulus	P	1	1	1.85185	0.144718	0.0754	0.658	OVER	F1PBI6
GO:1903844	regulation of cellular response to transforming growth factor beta stimulus	P	1	1	1.85185	0.144718	0.0754	0.658	OVER	F1PBI6
GO:0000413	protein peptidyl-prolyl isomerization	P	1	1	1.85185	0.144718	0.0754	0.658	OVER	Q9MZD3
GO:0045069	regulation of viral genome replication	P	1	1	1.85185	0.144718	0.0754	0.658	OVER	Q9MZD3
GO:1901654	response to ketone	P	1	1	1.85185	0.144718	0.0754	0.658	OVER	F1PBI6
GO:0019430	removal of superoxide radicals	P	1	1	1.85185	0.144718	0.0754	0.658	OVER	F1PCG4
GO:1903825	organic acid transmembrane transport	P	1	1	1.85185	0.144718	0.0754	0.658	OVER	F1PBI6
GO:0097427	microtubule bundle	C	1	1	1.85185	0.144718	0.0754	0.658	OVER	J9NTJ3
GO:1900542	regulation of purine nucleotide metabolic process	P	1	1	1.85185	0.144718	0.0754	0.658	OVER	F1PBI6
GO:0009636	response to toxic substance	P	1	1	1.85185	0.144718	0.0754	0.658	OVER	F1PCG4
GO:2001027	negative regulation of endothelial cell chemotaxis	P	1	1	1.85185	0.144718	0.0754	0.658	OVER	F1PBI6
GO:2001026	regulation of endothelial cell chemotaxis	P	1	1	1.85185	0.144718	0.0754	0.658	OVER	F1PBI6
GO:0034116	positive regulation of heterotypic cell-cell adhesion	P	1	1	1.85185	0.144718	0.0754	0.658	OVER	F1PGS2
GO:0034114	regulation of heterotypic cell-cell adhesion	P	1	1	1.85185	0.144718	0.0754	0.658	OVER	F1PGS2
GO:0034113	heterotypic cell-cell adhesion	P	1	1	1.85185	0.144718	0.0754	0.658	OVER	F1PGS2
GO:0004139	deoxyribose-phosphate aldolase activity	F	1	1	1.85185	0.144718	0.0754	0.658	OVER	F1PPB6
GO:0051047	positive regulation of secretion	P	1	1	1.85185	0.144718	0.0754	0.658	OVER	F1PGS2
GO:0003018	vascular process in circulatory system	P	1	1	1.85185	0.144718	0.0754	0.658	OVER	F1PGS2
GO:0072341	modified amino acid binding	F	1	1	1.85185	0.144718	0.0754	0.658	OVER	F1PBI6
GO:0034774	secretory granule lumen	C	1	1	1.85185	0.144718	0.0754	0.658	OVER	F1PBI6
GO:0016715	"oxidoreductase activity, acting on paired donors, with incorporation or reduction of molecular oxygen, reduced ascorbate as one donor, and incorporation of one atom of oxygen"	F	1	1	1.85185	0.144718	0.0754	0.658	OVER	F6X870
GO:1902043	positive regulation of extrinsic apoptotic signaling pathway via death domain receptors	P	1	1	1.85185	0.144718	0.0754	0.658	OVER	F1PBI6
GO:1902042	negative regulation of extrinsic apoptotic signaling pathway via death domain receptors	P	1	1	1.85185	0.144718	0.0754	0.658	OVER	F1PGS2
GO:0032570	response to progesterone	P	1	1	1.85185	0.144718	0.0754	0.658	OVER	F1PBI6
GO:0042310	vasoconstriction	P	1	1	1.85185	0.144718	0.0754	0.658	OVER	F1PGS2
GO:0002581	negative regulation of antigen processing and presentation of peptide or polysaccharide antigen via MHC class II	P	1	1	1.85185	0.144718	0.0754	0.658	OVER	F1PBI6
GO:0002580	regulation of antigen processing and presentation of peptide or polysaccharide antigen via MHC class II	P	1	1	1.85185	0.144718	0.0754	0.658	OVER	F1PBI6
GO:0002578	negative regulation of antigen processing and presentation	P	1	1	1.85185	0.144718	0.0754	0.658	OVER	F1PBI6
GO:0002577	regulation of antigen processing and presentation	P	1	1	1.85185	0.144718	0.0754	0.658	OVER	F1PBI6
GO:0002576	platelet degranulation	P	1	1	1.85185	0.144718	0.0754	0.658	OVER	F1PBI6
GO:1902001	fatty acid transmembrane transport	P	1	1	1.85185	0.144718	0.0754	0.658	OVER	F1PBI6
GO:0006911	"phagocytosis, engulfment"	P	1	1	1.85185	0.144718	0.0754	0.658	OVER	F1PBI6
GO:0002544	chronic inflammatory response	P	1	1	1.85185	0.144718	0.0754	0.658	OVER	F1PBI6
GO:1903792	negative regulation of anion transport	P	1	1	1.85185	0.144718	0.0754	0.658	OVER	F1PBI6
GO:0002504	antigen processing and presentation of peptide or polysaccharide antigen via MHC class II	P	1	1	1.85185	0.144718	0.0754	0.658	OVER	F1PBI6
GO:0046068	cGMP metabolic process	P	1	1	1.85185	0.144718	0.0754	0.658	OVER	F1PBI6
GO:0000305	response to oxygen radical	P	1	1	1.85185	0.144718	0.0754	0.658	OVER	F1PCG4
GO:0000303	response to superoxide	P	1	1	1.85185	0.144718	0.0754	0.658	OVER	F1PCG4
GO:0017157	regulation of exocytosis	P	1	1	1.85185	0.144718	0.0754	0.658	OVER	F1PGS2
GO:0071814	protein-lipid complex binding	F	1	1	1.85185	0.144718	0.0754	0.658	OVER	F1PBI6
GO:0071813	lipoprotein particle binding	F	1	1	1.85185	0.144718	0.0754	0.658	OVER	F1PBI6
GO:0010763	positive regulation of fibroblast migration	P	1	1	1.85185	0.144718	0.0754	0.658	OVER	F1PBI6
GO:0010762	regulation of fibroblast migration	P	1	1	1.85185	0.144718	0.0754	0.658	OVER	F1PBI6
GO:0010761	fibroblast migration	P	1	1	1.85185	0.144718	0.0754	0.658	OVER	F1PBI6
GO:0010754	negative regulation of cGMP-mediated signaling	P	1	1	1.85185	0.144718	0.0754	0.658	OVER	F1PBI6
GO:0010752	regulation of cGMP-mediated signaling	P	1	1	1.85185	0.144718	0.0754	0.658	OVER	F1PBI6
GO:0010751	negative regulation of nitric oxide mediated signal transduction	P	1	1	1.85185	0.144718	0.0754	0.658	OVER	F1PBI6
GO:0017134	fibroblast growth factor binding	F	1	1	1.85185	0.144718	0.0754	0.658	OVER	F1PBI6
GO:0010749	regulation of nitric oxide mediated signal transduction	P	1	1	1.85185	0.144718	0.0754	0.658	OVER	F1PBI6
GO:0010748	negative regulation of plasma membrane long-chain fatty acid transport	P	1	1	1.85185	0.144718	0.0754	0.658	OVER	F1PBI6
GO:0010746	regulation of plasma membrane long-chain fatty acid transport	P	1	1	1.85185	0.144718	0.0754	0.658	OVER	F1PBI6
GO:0010739	positive regulation of protein kinase A signaling	P	1	1	1.85185	0.144718	0.0754	0.658	OVER	J9NVE9
GO:0010738	regulation of protein kinase A signaling	P	1	1	1.85185	0.144718	0.0754	0.658	OVER	J9NVE9
GO:0010737	protein kinase A signaling	P	1	1	1.85185	0.144718	0.0754	0.658	OVER	J9NVE9
GO:0018208	peptidyl-proline modification	P	1	1	1.85185	0.144718	0.0754	0.658	OVER	Q9MZD3
GO:0035150	regulation of tube size	P	1	1	1.85185	0.144718	0.0754	0.658	OVER	F1PGS2
GO:0004089	carbonate dehydratase activity	F	1	1	1.85185	0.144718	0.0754	0.658	OVER	F1PBK6
GO:0019955	cytokine binding	F	1	1	1.85185	0.144718	0.0754	0.658	OVER	F1PBI6
GO:0019935	cyclic-nucleotide-mediated signaling	P	1	1	1.85185	0.144718	0.0754	0.658	OVER	F1PBI6
GO:0019934	cGMP-mediated signaling	P	1	1	1.85185	0.144718	0.0754	0.658	OVER	F1PBI6
GO:0019932	second-messenger-mediated signaling	P	1	1	1.85185	0.144718	0.0754	0.658	OVER	F1PBI6
GO:0090288	negative regulation of cellular response to growth factor stimulus	P	1	1	1.85185	0.144718	0.0754	0.658	OVER	F1PBI6
GO:0090287	regulation of cellular response to growth factor stimulus	P	1	1	1.85185	0.144718	0.0754	0.658	OVER	F1PBI6
GO:0035767	endothelial cell chemotaxis	P	1	1	1.85185	0.144718	0.0754	0.658	OVER	F1PBI6
GO:0070052	collagen V binding	F	1	1	1.85185	0.144718	0.0754	0.658	OVER	F1PBI6
GO:0070051	fibrinogen binding	F	1	1	1.85185	0.144718	0.0754	0.658	OVER	F1PBI6
GO:0090277	positive regulation of peptide hormone secretion	P	1	1	1.85185	0.144718	0.0754	0.658	OVER	F1PGS2
GO:0090276	regulation of peptide hormone secretion	P	1	1	1.85185	0.144718	0.0754	0.658	OVER	F1PGS2
GO:0032465	regulation of cytokinesis	P	1	1	1.85185	0.144718	0.0754	0.658	OVER	F1PN38
GO:0040037	negative regulation of fibroblast growth factor receptor signaling pathway	P	1	1	1.85185	0.144718	0.0754	0.658	OVER	F1PBI6
GO:0040036	regulation of fibroblast growth factor receptor signaling pathway	P	1	1	1.85185	0.144718	0.0754	0.658	OVER	F1PBI6
GO:0002468	dendritic cell antigen processing and presentation	P	1	1	1.85185	0.144718	0.0754	0.658	OVER	F1PBI6
GO:0034614	cellular response to reactive oxygen species	P	1	1	1.85185	0.144718	0.0754	0.658	OVER	F1PCG4
GO:0060205	cytoplasmic membrane-bounded vesicle lumen	C	1	1	1.85185	0.144718	0.0754	0.658	OVER	F1PBI6
GO:0050431	transforming growth factor beta binding	F	1	1	1.85185	0.144718	0.0754	0.658	OVER	F1PBI6
GO:0031983	vesicle lumen	C	1	1	1.85185	0.144718	0.0754	0.658	OVER	F1PBI6
GO:0019229	regulation of vasoconstriction	P	1	1	1.85185	0.144718	0.0754	0.658	OVER	F1PGS2
GO:0071706	tumor necrosis factor superfamily cytokine production	P	1	1	1.85185	0.144718	0.0754	0.658	OVER	F1PBI6
GO:0035088	establishment or maintenance of apical/basal cell polarity	P	1	1	1.85185	0.144718	0.0754	0.658	OVER	J9NTJ3
GO:0010634	positive regulation of epithelial cell migration	P	1	1	1.85185	0.144718	0.0754	0.658	OVER	F1PBI6
GO:0010633	negative regulation of epithelial cell migration	P	1	1	1.85185	0.144718	0.0754	0.658	OVER	F1PBI6
GO:0010632	regulation of epithelial cell migration	P	1	1	1.85185	0.144718	0.0754	0.658	OVER	F1PBI6
GO:0007263	nitric oxide mediated signal transduction	P	1	1	1.85185	0.144718	0.0754	0.658	OVER	F1PBI6
GO:0017015	regulation of transforming growth factor beta receptor signaling pathway	P	1	1	1.85185	0.144718	0.0754	0.658	OVER	F1PBI6
GO:0001968	fibronectin binding	F	1	1	1.85185	0.144718	0.0754	0.658	OVER	F1PBI6
GO:0001937	negative regulation of endothelial cell proliferation	P	1	1	1.85185	0.144718	0.0754	0.658	OVER	F1PBI6
GO:0001936	regulation of endothelial cell proliferation	P	1	1	1.85185	0.144718	0.0754	0.658	OVER	F1PBI6
GO:0001935	endothelial cell proliferation	P	1	1	1.85185	0.144718	0.0754	0.658	OVER	F1PBI6
GO:0030823	regulation of cGMP metabolic process	P	1	1	1.85185	0.144718	0.0754	0.658	OVER	F1PBI6
GO:0016597	amino acid binding	F	1	1	1.85185	0.144718	0.0754	0.658	OVER	F1PBI6
GO:0023061	signal release	P	1	1	1.85185	0.144718	0.0754	0.658	OVER	F1PGS2
GO:2000379	positive regulation of reactive oxygen species metabolic process	P	1	1	1.85185	0.144718	0.0754	0.658	OVER	F1PBI6
GO:2000377	regulation of reactive oxygen species metabolic process	P	1	1	1.85185	0.144718	0.0754	0.658	OVER	F1PBI6
GO:0034599	cellular response to oxidative stress	P	1	1	1.85185	0.144718	0.0754	0.658	OVER	F1PCG4
GO:2000353	positive regulation of endothelial cell apoptotic process	P	1	1	1.85185	0.144718	0.0754	0.658	OVER	F1PBI6
GO:2000352	negative regulation of endothelial cell apoptotic process	P	1	1	1.85185	0.144718	0.0754	0.658	OVER	F1PGS2
GO:1904036	negative regulation of epithelial cell apoptotic process	P	1	1	1.85185	0.144718	0.0754	0.658	OVER	F1PGS2
GO:0032369	negative regulation of lipid transport	P	1	1	1.85185	0.144718	0.0754	0.658	OVER	F1PBI6
GO:0042116	macrophage activation	P	1	1	1.85185	0.144718	0.0754	0.658	OVER	F1PBI6
GO:0006730	one-carbon metabolic process	P	1	1	1.85185	0.144718	0.0754	0.658	OVER	F1PBK6
GO:0061245	establishment or maintenance of bipolar cell polarity	P	1	1	1.85185	0.144718	0.0754	0.658	OVER	J9NTJ3
GO:0042108	positive regulation of cytokine biosynthetic process	P	1	1	1.85185	0.144718	0.0754	0.658	OVER	F1PBI6
GO:0042107	cytokine metabolic process	P	1	1	1.85185	0.144718	0.0754	0.658	OVER	F1PBI6
GO:0030169	low-density lipoprotein particle binding	F	1	1	1.85185	0.144718	0.0754	0.658	OVER	F1PBI6
GO:0090109	regulation of cell-substrate junction assembly	P	1	1	1.85185	0.144718	0.0754	0.658	OVER	F1PBI6
GO:0090100	positive regulation of transmembrane receptor protein serine/threonine kinase signaling pathway	P	1	1	1.85185	0.144718	0.0754	0.658	OVER	F1PBI6
GO:1903557	positive regulation of tumor necrosis factor superfamily cytokine production	P	1	1	1.85185	0.144718	0.0754	0.658	OVER	F1PBI6
GO:1903555	regulation of tumor necrosis factor superfamily cytokine production	P	1	1	1.85185	0.144718	0.0754	0.658	OVER	F1PBI6
GO:0010596	negative regulation of endothelial cell migration	P	1	1	1.85185	0.144718	0.0754	0.658	OVER	F1PBI6
GO:0010595	positive regulation of endothelial cell migration	P	1	1	1.85185	0.144718	0.0754	0.658	OVER	F1PBI6
GO:0048041	focal adhesion assembly	P	1	1	1.85185	0.144718	0.0754	0.658	OVER	F1PBI6
GO:0010594	regulation of endothelial cell migration	P	1	1	1.85185	0.144718	0.0754	0.658	OVER	F1PBI6
GO:1903532	positive regulation of secretion by cell	P	1	1	1.85185	0.144718	0.0754	0.658	OVER	F1PGS2
GO:1903524	positive regulation of blood circulation	P	1	1	1.85185	0.144718	0.0754	0.658	OVER	F1PGS2
GO:0030799	regulation of cyclic nucleotide metabolic process	P	1	1	1.85185	0.144718	0.0754	0.658	OVER	F1PBI6
GO:1903522	regulation of blood circulation	P	1	1	1.85185	0.144718	0.0754	0.658	OVER	F1PGS2
GO:0007179	transforming growth factor beta receptor signaling pathway	P	1	1	1.85185	0.144718	0.0754	0.658	OVER	F1PBI6
GO:0036066	protein O-linked fucosylation	P	1	1	1.85185	0.144718	0.0754	0.658	OVER	F1PBI6
GO:0036065	fucosylation	P	1	1	1.85185	0.144718	0.0754	0.658	OVER	F1PBI6
GO:0050922	negative regulation of chemotaxis	P	1	1	1.85185	0.144718	0.0754	0.658	OVER	F1PBI6
GO:0050921	positive regulation of chemotaxis	P	1	1	1.85185	0.144718	0.0754	0.658	OVER	F1PBI6
GO:0050920	regulation of chemotaxis	P	1	1	1.85185	0.144718	0.0754	0.658	OVER	F1PBI6
GO:0042089	cytokine biosynthetic process	P	1	1	1.85185	0.144718	0.0754	0.658	OVER	F1PBI6
GO:0090092	regulation of transmembrane receptor protein serine/threonine kinase signaling pathway	P	1	1	1.85185	0.144718	0.0754	0.658	OVER	F1PBI6
GO:0043154	negative regulation of cysteine-type endopeptidase activity involved in apoptotic process	P	1	1	1.85185	0.144718	0.0754	0.658	OVER	F1PBI6
GO:0043152	induction of bacterial agglutination	P	1	1	1.85185	0.144718	0.0754	0.658	OVER	F1PGS2
GO:0090087	regulation of peptide transport	P	1	1	1.85185	0.144718	0.0754	0.658	OVER	F1PGS2
GO:0042035	regulation of cytokine biosynthetic process	P	1	1	1.85185	0.144718	0.0754	0.658	OVER	F1PBI6
GO:0072001	renal system development	P	1	1	1.85185	0.144718	0.0754	0.658	OVER	E2RI99
GO:0030072	peptide hormone secretion	P	1	1	1.85185	0.144718	0.0754	0.658	OVER	F1PGS2
GO:0071560	cellular response to transforming growth factor beta stimulus	P	1	1	1.85185	0.144718	0.0754	0.658	OVER	F1PBI6
GO:0019079	viral genome replication	P	1	1	1.85185	0.144718	0.0754	0.658	OVER	Q9MZD3
GO:1901292	nucleoside phosphate catabolic process	P	1	1	1.85185	0.144718	0.0754	0.658	OVER	F1PPB6
GO:0071559	response to transforming growth factor beta	P	1	1	1.85185	0.144718	0.0754	0.658	OVER	F1PBI6
GO:0045921	positive regulation of exocytosis	P	1	1	1.85185	0.144718	0.0754	0.658	OVER	F1PGS2
GO:0032891	negative regulation of organic acid transport	P	1	1	1.85185	0.144718	0.0754	0.658	OVER	F1PBI6
GO:0032890	regulation of organic acid transport	P	1	1	1.85185	0.144718	0.0754	0.658	OVER	F1PBI6
GO:0045907	positive regulation of vasoconstriction	P	1	1	1.85185	0.144718	0.0754	0.658	OVER	F1PGS2
GO:0015911	plasma membrane long-chain fatty acid transport	P	1	1	1.85185	0.144718	0.0754	0.658	OVER	F1PBI6
GO:0015909	long-chain fatty acid transport	P	1	1	1.85185	0.144718	0.0754	0.658	OVER	F1PBI6
GO:0015908	fatty acid transport	P	1	1	1.85185	0.144718	0.0754	0.658	OVER	F1PBI6
GO:0009264	deoxyribonucleotide catabolic process	P	1	1	1.85185	0.144718	0.0754	0.658	OVER	F1PPB6
GO:0009262	deoxyribonucleotide metabolic process	P	1	1	1.85185	0.144718	0.0754	0.658	OVER	F1PPB6
GO:0001786	phosphatidylserine binding	F	1	1	1.85185	0.144718	0.0754	0.658	OVER	F1PBI6
GO:0050880	regulation of blood vessel size	P	1	1	1.85185	0.144718	0.0754	0.658	OVER	F1PGS2
GO:0007050	cell cycle arrest	P	1	1	1.85185	0.144718	0.0754	0.658	OVER	F1PBI6
GO:0007045	cell-substrate adherens junction assembly	P	1	1	1.85185	0.144718	0.0754	0.658	OVER	F1PBI6
GO:0007044	cell-substrate junction assembly	P	1	1	1.85185	0.144718	0.0754	0.658	OVER	F1PBI6
GO:1990748	cellular detoxification	P	1	1	1.85185	0.144718	0.0754	0.658	OVER	F1PCG4
GO:1901889	negative regulation of cell junction assembly	P	1	1	1.85185	0.144718	0.0754	0.658	OVER	F1PBI6
GO:1901888	regulation of cell junction assembly	P	1	1	1.85185	0.144718	0.0754	0.658	OVER	F1PBI6
GO:0098754	detoxification	P	1	1	1.85185	0.144718	0.0754	0.658	OVER	F1PCG4
GO:2000192	negative regulation of fatty acid transport	P	1	1	1.85185	0.144718	0.0754	0.658	OVER	F1PBI6
GO:0048521	negative regulation of behavior	P	1	1	1.85185	0.144718	0.0754	0.658	OVER	F1PBI6
GO:2000191	regulation of fatty acid transport	P	1	1	1.85185	0.144718	0.0754	0.658	OVER	F1PBI6
GO:0048520	positive regulation of behavior	P	1	1	1.85185	0.144718	0.0754	0.658	OVER	F1PBI6
GO:0016327	apicolateral plasma membrane	C	1	1	1.85185	0.144718	0.0754	0.658	OVER	J9NTJ3
GO:0016323	basolateral plasma membrane	C	1	1	1.85185	0.144718	0.0754	0.658	OVER	J9NU17
GO:2001238	positive regulation of extrinsic apoptotic signaling pathway	P	1	1	1.85185	0.144718	0.0754	0.658	OVER	F1PBI6
GO:0043032	positive regulation of macrophage activation	P	1	1	1.85185	0.144718	0.0754	0.658	OVER	F1PBI6
GO:0043030	regulation of macrophage activation	P	1	1	1.85185	0.144718	0.0754	0.658	OVER	F1PBI6
GO:0035457	cellular response to interferon-alpha	P	1	1	1.85185	0.144718	0.0754	0.658	OVER	F1PGC3
GO:0035455	response to interferon-alpha	P	1	1	1.85185	0.144718	0.0754	0.658	OVER	F1PGC3
GO:0031093	platelet alpha granule lumen	C	1	1	1.85185	0.144718	0.0754	0.658	OVER	F1PBI6
GO:0048522	positive regulation of cellular process	P	9	66	16.6667	9.55137	0.0797	0.693	OVER	"F1PE38, F1P8G0, E2R5H4, F1PBI6, J9NVE9, F1PBL4, E2RI13, F1PGS2, E2RI99"
GO:0012501	programmed cell death	P	3	14	5.55556	2.02605	0.0815	0.696	OVER	"F1PN38, F1PBI6, F1PGS2"
GO:0006461	protein complex assembly	P	3	14	5.55556	2.02605	0.0815	0.696	OVER	"F1P8G0, F1PBL4, F1PGS2"
GO:0051174	regulation of phosphorus metabolic process	P	3	14	5.55556	2.02605	0.0815	0.696	OVER	"F1PBI6, J9NVE9, F1PGS2"
GO:0070271	protein complex biogenesis	P	3	14	5.55556	2.02605	0.0815	0.696	OVER	"F1P8G0, F1PBL4, F1PGS2"
GO:0006915	apoptotic process	P	3	14	5.55556	2.02605	0.0815	0.696	OVER	"F1PN38, F1PBI6, F1PGS2"
GO:0031399	regulation of protein modification process	P	3	14	5.55556	2.02605	0.0815	0.696	OVER	"F1PBI6, J9NVE9, F1PGS2"
GO:0055085	transmembrane transport	P	3	14	5.55556	2.02605	0.0815	0.696	OVER	"F1PBI6, F1P865, Q0QEN2"
GO:0042221	response to chemical	P	7	49	12.963	7.09117	0.0845	0.72	OVER	"F1PDY8, F1PCG4, F1PBI6, J9NVE9, F1PGS2, E2RI99, F1PGC3"
GO:0009893	positive regulation of metabolic process	P	5	32	9.25926	4.63097	0.0847	0.72	OVER	"F1PBI6, J9NVE9, E2RI13, F1PGS2, E2RI99"
GO:0005198	structural molecule activity	F	4	23	7.40741	3.32851	0.0872	0.735	OVER	"F1PTS8, E2QSF4, J9P716, F1PGS2"
GO:0017111	nucleoside-triphosphatase activity	F	4	23	7.40741	3.32851	0.0872	0.735	OVER	"E2QSF4, J9NU17, J9P716, Q0QEN2"
GO:0035556	intracellular signal transduction	P	4	23	7.40741	3.32851	0.0872	0.735	OVER	"E2RIG8, F1PBI6, J9NVE9, F1PGS2"
GO:0072593	reactive oxygen species metabolic process	P	2	7	3.7037	1.01302	0.0918	0.754	OVER	"F1PCG4, F1PBI6"
GO:0032102	negative regulation of response to external stimulus	P	2	7	3.7037	1.01302	0.0918	0.754	OVER	"F1PBI6, F1PGS2"
GO:0071345	cellular response to cytokine stimulus	P	2	7	3.7037	1.01302	0.0918	0.754	OVER	"E2RI99, F1PGC3"
GO:0016829	lyase activity	F	2	7	3.7037	1.01302	0.0918	0.754	OVER	"F1PPB6, F1PBK6"
GO:0051726	regulation of cell cycle	P	2	7	3.7037	1.01302	0.0918	0.754	OVER	"F1PN38, F1PBI6"
GO:0005874	microtubule	C	2	7	3.7037	1.01302	0.0918	0.754	OVER	"E2QSF4, J9P716"
GO:0034097	response to cytokine	P	2	7	3.7037	1.01302	0.0918	0.754	OVER	"E2RI99, F1PGC3"
GO:1903035	negative regulation of response to wounding	P	2	7	3.7037	1.01302	0.0918	0.754	OVER	"F1PBI6, F1PGS2"
GO:0006355	"regulation of transcription, DNA-templated"	P	2	7	3.7037	1.01302	0.0918	0.754	OVER	"E2RI13, E2RI99"
GO:0050819	negative regulation of coagulation	P	2	7	3.7037	1.01302	0.0918	0.754	OVER	"F1PBI6, F1PGS2"
GO:0016818	"hydrolase activity, acting on acid anhydrides, in phosphorus-containing anhydrides"	F	4	24	7.40741	3.47323	0.099	0.801	OVER	"E2QSF4, J9NU17, J9P716, Q0QEN2"
GO:0016817	"hydrolase activity, acting on acid anhydrides"	F	4	24	7.40741	3.47323	0.099	0.801	OVER	"E2QSF4, J9NU17, J9P716, Q0QEN2"
GO:0070887	cellular response to chemical stimulus	P	4	24	7.40741	3.47323	0.099	0.801	OVER	"F1PCG4, F1PBI6, E2RI99, F1PGC3"
GO:0016462	pyrophosphatase activity	F	4	24	7.40741	3.47323	0.099	0.801	OVER	"E2QSF4, J9NU17, J9P716, Q0QEN2"
GO:0009966	regulation of signal transduction	P	4	24	7.40741	3.47323	0.099	0.801	OVER	"F1PN38, F1PBI6, J9NVE9, F1PGS2"
GO:0019693	ribose phosphate metabolic process	P	4	24	7.40741	3.47323	0.099	0.801	OVER	"P52784, F1PPB6, F1PBI6, Q0QEN2"
GO:0050778	positive regulation of immune response	P	0	35	0	5.06512	0.1	0.807	UNDER
GO:0002253	activation of immune response	P	0	34	0	4.92041	0.1	0.807	UNDER
GO:0048869	cellular developmental process	P	0	36	0	5.20984	0.101	0.807	UNDER
GO:0030234	enzyme regulator activity	F	0	36	0	5.20984	0.101	0.807	UNDER
GO:0050776	regulation of immune response	P	0	37	0	5.35456	0.102	0.816	UNDER
GO:0044421	extracellular region part	C	9	186	16.6667	26.9175	0.106	0.828	UNDER	"F1P8G0, F1PBI6, F1PBL4, F1PGS2, F5XVB0, F1Q432, E2RQF8, E2RRU2, F1PBK6"
GO:0009117	nucleotide metabolic process	P	4	25	7.40741	3.61795	0.112	0.828	OVER	"P52784, F1PPB6, F1PBI6, Q0QEN2"
GO:0006753	nucleoside phosphate metabolic process	P	4	25	7.40741	3.61795	0.112	0.828	OVER	"P52784, F1PPB6, F1PBI6, Q0QEN2"
GO:0016265	death	P	3	16	5.55556	2.31548	0.113	0.828	OVER	"F1PN38, F1PBI6, F1PGS2"
GO:0071310	cellular response to organic substance	P	3	16	5.55556	2.31548	0.113	0.828	OVER	"F1PBI6, E2RI99, F1PGC3"
GO:0065003	macromolecular complex assembly	P	3	16	5.55556	2.31548	0.113	0.828	OVER	"F1P8G0, F1PBL4, F1PGS2"
GO:0008283	cell proliferation	P	3	16	5.55556	2.31548	0.113	0.828	OVER	"F1PF31, F1PBI6, E2RI99"
GO:0008219	cell death	P	3	16	5.55556	2.31548	0.113	0.828	OVER	"F1PN38, F1PBI6, F1PGS2"
GO:0032270	positive regulation of cellular protein metabolic process	P	3	16	5.55556	2.31548	0.113	0.828	OVER	"F1PBI6, J9NVE9, F1PGS2"
GO:0031589	cell-substrate adhesion	P	2	8	3.7037	1.15774	0.117	0.828	OVER	"F1PBI6, F1PGS2"
GO:0031328	positive regulation of cellular biosynthetic process	P	2	8	3.7037	1.15774	0.117	0.828	OVER	"F1PBI6, E2RI13"
GO:0030155	regulation of cell adhesion	P	2	8	3.7037	1.15774	0.117	0.828	OVER	"F1PBI6, F1PGS2"
GO:0010557	positive regulation of macromolecule biosynthetic process	P	2	8	3.7037	1.15774	0.117	0.828	OVER	"F1PBI6, E2RI13"
GO:0055086	nucleobase-containing small molecule metabolic process	P	4	26	7.40741	3.76266	0.125	0.828	OVER	"P52784, F1PPB6, F1PBI6, Q0QEN2"
GO:0005856	cytoskeleton	C	6	43	11.1111	6.22287	0.126	0.828	OVER	"F1PTS8, E2QSF4, J9NTJ3, J9NU17, J9P716, C0LQL0"
GO:0044238	primary metabolic process	P	13	242	24.0741	35.0217	0.129	0.828	UNDER	"J9PB81, P52784, F1PPB6, F1PN38, E2R5H4, F1PBI6, J9NVE9, E2RI13, Q9MZD3, F1PGS2, E2QW34, E2RI99, Q0QEN2"
GO:0051247	positive regulation of protein metabolic process	P	3	17	5.55556	2.4602	0.13	0.828	OVER	"F1PBI6, J9NVE9, F1PGS2"
GO:0032101	regulation of response to external stimulus	P	3	17	5.55556	2.4602	0.13	0.828	OVER	"F1PBI6, F1PGS2, C0LQL0"
GO:1903034	regulation of response to wounding	P	3	17	5.55556	2.4602	0.13	0.828	OVER	"F1PBI6, F1PGS2, C0LQL0"
GO:0010646	regulation of cell communication	P	4	27	7.40741	3.90738	0.138	0.828	OVER	"F1PN38, F1PBI6, J9NVE9, F1PGS2"
GO:0023051	regulation of signaling	P	4	27	7.40741	3.90738	0.138	0.828	OVER	"F1PN38, F1PBI6, J9NVE9, F1PGS2"
GO:0006464	cellular protein modification process	P	6	45	11.1111	6.5123	0.139	0.828	OVER	"F1PN38, E2R5H4, F1PBI6, J9NVE9, Q9MZD3, F1PGS2"
GO:0036211	protein modification process	P	6	45	11.1111	6.5123	0.139	0.828	OVER	"F1PN38, E2R5H4, F1PBI6, J9NVE9, Q9MZD3, F1PGS2"
GO:0034220	ion transmembrane transport	P	2	9	3.7037	1.30246	0.143	0.828	OVER	"F1PBI6, Q0QEN2"
GO:0051173	positive regulation of nitrogen compound metabolic process	P	2	9	3.7037	1.30246	0.143	0.828	OVER	"F1PBI6, E2RI13"
GO:0051156	glucose 6-phosphate metabolic process	P	2	9	3.7037	1.30246	0.143	0.828	OVER	"P52784, F1PPB6"
GO:0016023	cytoplasmic membrane-bounded vesicle	C	2	9	3.7037	1.30246	0.143	0.828	OVER	"F1PBI6, F1PGS2"
GO:0010628	positive regulation of gene expression	P	2	9	3.7037	1.30246	0.143	0.828	OVER	"F1PBI6, E2RI13"
GO:0030198	extracellular matrix organization	P	2	9	3.7037	1.30246	0.143	0.828	OVER	"F1PBI6, F1Q432"
GO:0006739	NADP metabolic process	P	2	9	3.7037	1.30246	0.143	0.828	OVER	"P52784, F1PPB6"
GO:0006098	pentose-phosphate shunt	P	2	9	3.7037	1.30246	0.143	0.828	OVER	"P52784, F1PPB6"
GO:0009891	positive regulation of biosynthetic process	P	2	9	3.7037	1.30246	0.143	0.828	OVER	"F1PBI6, E2RI13"
GO:0043062	extracellular structure organization	P	2	9	3.7037	1.30246	0.143	0.828	OVER	"F1PBI6, F1Q432"
GO:2000116	regulation of cysteine-type endopeptidase activity	P	1	2	1.85185	0.289436	0.145	0.828	OVER	F1PBI6
GO:0034330	cell junction organization	P	1	2	1.85185	0.289436	0.145	0.828	OVER	F1PBI6
GO:0034329	cell junction assembly	P	1	2	1.85185	0.289436	0.145	0.828	OVER	F1PBI6
GO:0032147	activation of protein kinase activity	P	1	2	1.85185	0.289436	0.145	0.828	OVER	F1PBI6
GO:0045860	positive regulation of protein kinase activity	P	1	2	1.85185	0.289436	0.145	0.828	OVER	F1PBI6
GO:0045859	regulation of protein kinase activity	P	1	2	1.85185	0.289436	0.145	0.828	OVER	F1PBI6
GO:0044769	"ATPase activity, coupled to transmembrane movement of ions, rotational mechanism"	F	1	2	1.85185	0.289436	0.145	0.828	OVER	Q0QEN2
GO:0046933	"proton-transporting ATP synthase activity, rotational mechanism"	F	1	2	1.85185	0.289436	0.145	0.828	OVER	Q0QEN2
GO:0051222	positive regulation of protein transport	P	1	2	1.85185	0.289436	0.145	0.828	OVER	F1PGS2
GO:0072522	purine-containing compound biosynthetic process	P	1	2	1.85185	0.289436	0.145	0.828	OVER	Q0QEN2
GO:0003872	6-phosphofructokinase activity	F	1	2	1.85185	0.289436	0.145	0.828	OVER	P52784
GO:0009168	purine ribonucleoside monophosphate biosynthetic process	P	1	2	1.85185	0.289436	0.145	0.828	OVER	Q0QEN2
GO:0009163	nucleoside biosynthetic process	P	1	2	1.85185	0.289436	0.145	0.828	OVER	Q0QEN2
GO:0051897	positive regulation of protein kinase B signaling	P	1	2	1.85185	0.289436	0.145	0.828	OVER	F1PBI6
GO:0051896	regulation of protein kinase B signaling	P	1	2	1.85185	0.289436	0.145	0.828	OVER	F1PBI6
GO:0009156	ribonucleoside monophosphate biosynthetic process	P	1	2	1.85185	0.289436	0.145	0.828	OVER	Q0QEN2
GO:0009152	purine ribonucleotide biosynthetic process	P	1	2	1.85185	0.289436	0.145	0.828	OVER	Q0QEN2
GO:0009145	purine nucleoside triphosphate biosynthetic process	P	1	2	1.85185	0.289436	0.145	0.828	OVER	Q0QEN2
GO:0009142	nucleoside triphosphate biosynthetic process	P	1	2	1.85185	0.289436	0.145	0.828	OVER	Q0QEN2
GO:0050786	RAGE receptor binding	F	1	2	1.85185	0.289436	0.145	0.828	OVER	C0LQL0
GO:0001655	urogenital system development	P	1	2	1.85185	0.289436	0.145	0.828	OVER	E2RI99
GO:0009127	purine nucleoside monophosphate biosynthetic process	P	1	2	1.85185	0.289436	0.145	0.828	OVER	Q0QEN2
GO:0009124	nucleoside monophosphate biosynthetic process	P	1	2	1.85185	0.289436	0.145	0.828	OVER	Q0QEN2
GO:0050708	regulation of protein secretion	P	1	2	1.85185	0.289436	0.145	0.828	OVER	F1PGS2
GO:0010951	negative regulation of endopeptidase activity	P	1	2	1.85185	0.289436	0.145	0.828	OVER	F1PBI6
GO:1903900	regulation of viral life cycle	P	1	2	1.85185	0.289436	0.145	0.828	OVER	Q9MZD3
GO:0033178	"proton-transporting two-sector ATPase complex, catalytic domain"	C	1	2	1.85185	0.289436	0.145	0.828	OVER	Q0QEN2
GO:0034248	regulation of cellular amide metabolic process	P	1	2	1.85185	0.289436	0.145	0.828	OVER	F1PBI6
GO:0035325	Toll-like receptor binding	F	1	2	1.85185	0.289436	0.145	0.828	OVER	C0LQL0
GO:0045786	negative regulation of cell cycle	P	1	2	1.85185	0.289436	0.145	0.828	OVER	F1PBI6
GO:0006417	regulation of translation	P	1	2	1.85185	0.289436	0.145	0.828	OVER	F1PBI6
GO:0045766	positive regulation of angiogenesis	P	1	2	1.85185	0.289436	0.145	0.828	OVER	F1PBI6
GO:0042493	response to drug	P	1	2	1.85185	0.289436	0.145	0.828	OVER	F1PBI6
GO:0016832	aldehyde-lyase activity	F	1	2	1.85185	0.289436	0.145	0.828	OVER	F1PPB6
GO:0016830	carbon-carbon lyase activity	F	1	2	1.85185	0.289436	0.145	0.828	OVER	F1PPB6
GO:0043549	regulation of kinase activity	P	1	2	1.85185	0.289436	0.145	0.828	OVER	F1PBI6
GO:0043542	endothelial cell migration	P	1	2	1.85185	0.289436	0.145	0.828	OVER	F1PBI6
GO:0042455	ribonucleoside biosynthetic process	P	1	2	1.85185	0.289436	0.145	0.828	OVER	Q0QEN2
GO:0042451	purine nucleoside biosynthetic process	P	1	2	1.85185	0.289436	0.145	0.828	OVER	Q0QEN2
GO:0043534	blood vessel endothelial cell migration	P	1	2	1.85185	0.289436	0.145	0.828	OVER	F1PBI6
GO:0002696	positive regulation of leukocyte activation	P	1	2	1.85185	0.289436	0.145	0.828	OVER	F1PBI6
GO:0005945	6-phosphofructokinase complex	C	1	2	1.85185	0.289436	0.145	0.828	OVER	P52784
GO:1901659	glycosyl compound biosynthetic process	P	1	2	1.85185	0.289436	0.145	0.828	OVER	Q0QEN2
GO:0071902	positive regulation of protein serine/threonine kinase activity	P	1	2	1.85185	0.289436	0.145	0.828	OVER	F1PBI6
GO:0071900	regulation of protein serine/threonine kinase activity	P	1	2	1.85185	0.289436	0.145	0.828	OVER	F1PBI6
GO:0046129	purine ribonucleoside biosynthetic process	P	1	2	1.85185	0.289436	0.145	0.828	OVER	Q0QEN2
GO:0009615	response to virus	P	1	2	1.85185	0.289436	0.145	0.828	OVER	F1PGC3
GO:0051087	chaperone binding	F	1	2	1.85185	0.289436	0.145	0.828	OVER	F1PGS2
GO:0043491	protein kinase B signaling	P	1	2	1.85185	0.289436	0.145	0.828	OVER	F1PBI6
GO:0072378	"blood coagulation, fibrin clot formation"	P	1	2	1.85185	0.289436	0.145	0.828	OVER	F1PGS2
GO:0051046	regulation of secretion	P	1	2	1.85185	0.289436	0.145	0.828	OVER	F1PGS2
GO:0046700	heterocycle catabolic process	P	1	2	1.85185	0.289436	0.145	0.828	OVER	F1PPB6
GO:0034766	negative regulation of ion transmembrane transport	P	1	2	1.85185	0.289436	0.145	0.828	OVER	F1PBI6
GO:0034765	regulation of ion transmembrane transport	P	1	2	1.85185	0.289436	0.145	0.828	OVER	F1PBI6
GO:0034763	negative regulation of transmembrane transport	P	1	2	1.85185	0.289436	0.145	0.828	OVER	F1PBI6
GO:0034762	regulation of transmembrane transport	P	1	2	1.85185	0.289436	0.145	0.828	OVER	F1PBI6
GO:0033674	positive regulation of kinase activity	P	1	2	1.85185	0.289436	0.145	0.828	OVER	F1PBI6
GO:0043406	positive regulation of MAP kinase activity	P	1	2	1.85185	0.289436	0.145	0.828	OVER	F1PBI6
GO:0043405	regulation of MAP kinase activity	P	1	2	1.85185	0.289436	0.145	0.828	OVER	F1PBI6
GO:0051648	vesicle localization	P	1	2	1.85185	0.289436	0.145	0.828	OVER	J9NU17
GO:0051640	organelle localization	P	1	2	1.85185	0.289436	0.145	0.828	OVER	J9NU17
GO:0050544	arachidonic acid binding	F	1	2	1.85185	0.289436	0.145	0.828	OVER	C0LQL0
GO:0050543	icosatetraenoic acid binding	F	1	2	1.85185	0.289436	0.145	0.828	OVER	C0LQL0
GO:0050542	icosanoid binding	F	1	2	1.85185	0.289436	0.145	0.828	OVER	C0LQL0
GO:1901567	fatty acid derivative binding	F	1	2	1.85185	0.289436	0.145	0.828	OVER	C0LQL0
GO:0010757	negative regulation of plasminogen activation	P	1	2	1.85185	0.289436	0.145	0.828	OVER	F1PBI6
GO:0010755	regulation of plasminogen activation	P	1	2	1.85185	0.289436	0.145	0.828	OVER	F1PBI6
GO:1902600	hydrogen ion transmembrane transport	P	1	2	1.85185	0.289436	0.145	0.828	OVER	Q0QEN2
GO:0018209	peptidyl-serine modification	P	1	2	1.85185	0.289436	0.145	0.828	OVER	J9NVE9
GO:0008443	phosphofructokinase activity	F	1	2	1.85185	0.289436	0.145	0.828	OVER	P52784
GO:0000910	cytokinesis	P	1	2	1.85185	0.289436	0.145	0.828	OVER	F1PN38
GO:0034655	nucleobase-containing compound catabolic process	P	1	2	1.85185	0.289436	0.145	0.828	OVER	F1PPB6
GO:0042886	amide transport	P	1	2	1.85185	0.289436	0.145	0.828	OVER	F1PGS2
GO:0018149	peptide cross-linking	P	1	2	1.85185	0.289436	0.145	0.828	OVER	F1PBI6
GO:1902532	negative regulation of intracellular signal transduction	P	1	2	1.85185	0.289436	0.145	0.828	OVER	F1PBI6
GO:0008379	thioredoxin peroxidase activity	F	1	2	1.85185	0.289436	0.145	0.828	OVER	F1PCG4
GO:0019200	carbohydrate kinase activity	F	1	2	1.85185	0.289436	0.145	0.828	OVER	P52784
GO:0010631	epithelial cell migration	P	1	2	1.85185	0.289436	0.145	0.828	OVER	F1PBI6
GO:0018105	peptidyl-serine phosphorylation	P	1	2	1.85185	0.289436	0.145	0.828	OVER	J9NVE9
GO:0031941	filamentous actin	C	1	2	1.85185	0.289436	0.145	0.828	OVER	J9NU17
GO:0006164	purine nucleotide biosynthetic process	P	1	2	1.85185	0.289436	0.145	0.828	OVER	Q0QEN2
GO:0001953	negative regulation of cell-matrix adhesion	P	1	2	1.85185	0.289436	0.145	0.828	OVER	F1PBI6
GO:0001952	regulation of cell-matrix adhesion	P	1	2	1.85185	0.289436	0.145	0.828	OVER	F1PBI6
GO:0006140	regulation of nucleotide metabolic process	P	1	2	1.85185	0.289436	0.145	0.828	OVER	F1PBI6
GO:0043281	regulation of cysteine-type endopeptidase activity involved in apoptotic process	P	1	2	1.85185	0.289436	0.145	0.828	OVER	F1PBI6
GO:0043277	apoptotic cell clearance	P	1	2	1.85185	0.289436	0.145	0.828	OVER	F1PBI6
GO:0043271	negative regulation of ion transport	P	1	2	1.85185	0.289436	0.145	0.828	OVER	F1PBI6
GO:0043269	regulation of ion transport	P	1	2	1.85185	0.289436	0.145	0.828	OVER	F1PBI6
GO:0035662	Toll-like receptor 4 binding	F	1	2	1.85185	0.289436	0.145	0.828	OVER	C0LQL0
GO:1904037	positive regulation of epithelial cell apoptotic process	P	1	2	1.85185	0.289436	0.145	0.828	OVER	F1PBI6
GO:0006754	ATP biosynthetic process	P	1	2	1.85185	0.289436	0.145	0.828	OVER	Q0QEN2
GO:1904018	positive regulation of vasculature development	P	1	2	1.85185	0.289436	0.145	0.828	OVER	F1PBI6
GO:0030199	collagen fibril organization	P	1	2	1.85185	0.289436	0.145	0.828	OVER	F1Q432
GO:0090132	epithelium migration	P	1	2	1.85185	0.289436	0.145	0.828	OVER	F1PBI6
GO:0090130	tissue migration	P	1	2	1.85185	0.289436	0.145	0.828	OVER	F1PBI6
GO:0000187	activation of MAPK activity	P	1	2	1.85185	0.289436	0.145	0.828	OVER	F1PBI6
GO:1901361	organic cyclic compound catabolic process	P	1	2	1.85185	0.289436	0.145	0.828	OVER	F1PPB6
GO:1903530	regulation of secretion by cell	P	1	2	1.85185	0.289436	0.145	0.828	OVER	F1PGS2
GO:0070527	platelet aggregation	P	1	2	1.85185	0.289436	0.145	0.828	OVER	F1PGS2
GO:0050996	positive regulation of lipid catabolic process	P	1	2	1.85185	0.289436	0.145	0.828	OVER	J9NVE9
GO:0050994	regulation of lipid catabolic process	P	1	2	1.85185	0.289436	0.145	0.828	OVER	J9NVE9
GO:0007163	establishment or maintenance of cell polarity	P	1	2	1.85185	0.289436	0.145	0.828	OVER	J9NTJ3
GO:0036041	long-chain fatty acid binding	F	1	2	1.85185	0.289436	0.145	0.828	OVER	C0LQL0
GO:0009306	protein secretion	P	1	2	1.85185	0.289436	0.145	0.828	OVER	F1PGS2
GO:0001818	negative regulation of cytokine production	P	1	2	1.85185	0.289436	0.145	0.828	OVER	F1PBI6
GO:0006002	fructose 6-phosphate metabolic process	P	1	2	1.85185	0.289436	0.145	0.828	OVER	P52784
GO:0044270	cellular nitrogen compound catabolic process	P	1	2	1.85185	0.289436	0.145	0.828	OVER	F1PPB6
GO:0019731	antibacterial humoral response	P	1	2	1.85185	0.289436	0.145	0.828	OVER	F1PGS2
GO:0019730	antimicrobial humoral response	P	1	2	1.85185	0.289436	0.145	0.828	OVER	F1PGS2
GO:0016469	proton-transporting two-sector ATPase complex	C	1	2	1.85185	0.289436	0.145	0.828	OVER	Q0QEN2
GO:0004497	monooxygenase activity	F	1	2	1.85185	0.289436	0.145	0.828	OVER	F6X870
GO:0009914	hormone transport	P	1	2	1.85185	0.289436	0.145	0.828	OVER	F1PGS2
GO:0002274	myeloid leukocyte activation	P	1	2	1.85185	0.289436	0.145	0.828	OVER	F1PBI6
GO:0015991	ATP hydrolysis coupled proton transport	P	1	2	1.85185	0.289436	0.145	0.828	OVER	Q0QEN2
GO:0015988	"energy coupled proton transmembrane transport, against electrochemical gradient"	P	1	2	1.85185	0.289436	0.145	0.828	OVER	Q0QEN2
GO:0015986	ATP synthesis coupled proton transport	P	1	2	1.85185	0.289436	0.145	0.828	OVER	Q0QEN2
GO:0015985	"energy coupled proton transport, down electrochemical gradient"	P	1	2	1.85185	0.289436	0.145	0.828	OVER	Q0QEN2
GO:0005504	fatty acid binding	F	1	2	1.85185	0.289436	0.145	0.828	OVER	C0LQL0
GO:0051302	regulation of cell division	P	1	2	1.85185	0.289436	0.145	0.828	OVER	F1PN38
GO:0022409	positive regulation of cell-cell adhesion	P	1	2	1.85185	0.289436	0.145	0.828	OVER	F1PGS2
GO:0009260	ribonucleotide biosynthetic process	P	1	2	1.85185	0.289436	0.145	0.828	OVER	Q0QEN2
GO:0050867	positive regulation of cell activation	P	1	2	1.85185	0.289436	0.145	0.828	OVER	F1PBI6
GO:0046390	ribose phosphate biosynthetic process	P	1	2	1.85185	0.289436	0.145	0.828	OVER	Q0QEN2
GO:0009206	purine ribonucleoside triphosphate biosynthetic process	P	1	2	1.85185	0.289436	0.145	0.828	OVER	Q0QEN2
GO:0009201	ribonucleoside triphosphate biosynthetic process	P	1	2	1.85185	0.289436	0.145	0.828	OVER	Q0QEN2
GO:0045259	proton-transporting ATP synthase complex	C	1	2	1.85185	0.289436	0.145	0.828	OVER	Q0QEN2
GO:0033293	monocarboxylic acid binding	F	1	2	1.85185	0.289436	0.145	0.828	OVER	C0LQL0
GO:0045216	cell-cell junction organization	P	1	2	1.85185	0.289436	0.145	0.828	OVER	F1PBI6
GO:2001235	positive regulation of apoptotic signaling pathway	P	1	2	1.85185	0.289436	0.145	0.828	OVER	F1PBI6
GO:0043412	macromolecule modification	P	6	46	11.1111	6.65702	0.147	0.835	OVER	"F1PN38, E2R5H4, F1PBI6, J9NVE9, Q9MZD3, F1PGS2"
GO:0043170	macromolecule metabolic process	P	10	193	18.5185	27.9305	0.151	0.856	UNDER	"J9PB81, F1PN38, E2R5H4, F1PBI6, J9NVE9, E2RI13, Q9MZD3, F1PGS2, E2QW34, E2RI99"
GO:0031012	extracellular matrix	C	4	28	7.40741	4.0521	0.153	0.867	OVER	"F1PF31, F1PBI6, F5XVB0, F1Q432"
GO:0030154	cell differentiation	P	0	33	0	4.77569	0.165	0.931	UNDER
GO:0080134	regulation of response to stress	P	3	19	5.55556	2.74964	0.167	0.936	OVER	"F1PBI6, F1PGS2, C0LQL0"
GO:0009150	purine ribonucleotide metabolic process	P	3	19	5.55556	2.74964	0.167	0.936	OVER	"P52784, F1PBI6, Q0QEN2"
GO:0006163	purine nucleotide metabolic process	P	3	19	5.55556	2.74964	0.167	0.936	OVER	"P52784, F1PBI6, Q0QEN2"
GO:0009259	ribonucleotide metabolic process	P	3	19	5.55556	2.74964	0.167	0.936	OVER	"P52784, F1PBI6, Q0QEN2"
GO:0006518	peptide metabolic process	P	2	10	3.7037	1.44718	0.17	0.939	OVER	"F1PBI6, F6X870"
GO:0001071	nucleic acid binding transcription factor activity	F	2	10	3.7037	1.44718	0.17	0.939	OVER	"E2RI13, E2RI99"
GO:1901137	carbohydrate derivative biosynthetic process	P	2	10	3.7037	1.44718	0.17	0.939	OVER	"F1PBI6, Q0QEN2"
GO:1900046	regulation of hemostasis	P	2	10	3.7037	1.44718	0.17	0.939	OVER	"F1PBI6, F1PGS2"
GO:0003700	"transcription factor activity, sequence-specific DNA binding"	F	2	10	3.7037	1.44718	0.17	0.939	OVER	"E2RI13, E2RI99"
GO:0031410	cytoplasmic vesicle	C	2	10	3.7037	1.44718	0.17	0.939	OVER	"F1PBI6, F1PGS2"
GO:0010629	negative regulation of gene expression	P	2	10	3.7037	1.44718	0.17	0.939	OVER	"F1PBI6, J9NVE9"
GO:0030193	regulation of blood coagulation	P	2	10	3.7037	1.44718	0.17	0.939	OVER	"F1PBI6, F1PGS2"
GO:0009986	cell surface	C	2	10	3.7037	1.44718	0.17	0.939	OVER	"F1PBI6, F1PGS2"
GO:0005578	proteinaceous extracellular matrix	C	2	10	3.7037	1.44718	0.17	0.939	OVER	"F5XVB0, F1Q432"
GO:0019682	glyceraldehyde-3-phosphate metabolic process	P	2	10	3.7037	1.44718	0.17	0.939	OVER	"P52784, F1PPB6"
GO:0044765	single-organism transport	P	9	80	16.6667	11.5774	0.179	0.983	OVER	"P60529, J9JHF7, P60524, F1P8V6, F1PBI6, F1PGS2, J9JHZ3, F1P865, Q0QEN2"
GO:0071704	organic substance metabolic process	P	15	265	27.7778	38.3502	0.179	0.983	UNDER	"J9PB81, P52784, F1PPB6, F1PN38, E2R5H4, F1PBI6, F6X870, J9NVE9, E2RI13, Q9MZD3, F1PGS2, F1Q432, E2QW34, E2RI99, Q0QEN2"
GO:0006796	phosphate-containing compound metabolic process	P	7	57	12.963	8.24891	0.184	1	OVER	"P52784, F1PPB6, E2R5H4, F1PBI6, J9NVE9, F1PGS2, Q0QEN2"
GO:0044699	single-organism process	P	34	388	62.963	56.1505	0.186	1	OVER	"F1PDY8, F1PCG4, P52784, E2QSF4, F1PPB6, P60529, J9P6T6, J9NTJ3, J9NU17, J9JHF7, P60524, F1PF31, F1PN38, F1PE38, E2RIG8, F1P8G0, E2R5H4, F1P8V6, F1PBI6, J9P716, F6X870, J9NVE9, F1PBL4, F1PGS2, F5XVB0, J9NVT1, J9JHZ3, F1Q432, E2RQF8, F1PBK6, F1P865, E2RI99, C0LQL0, Q0QEN2"
GO:0008152	metabolic process	P	17	286	31.4815	41.3893	0.188	1	UNDER	"J9PB81, F1PCG4, P52784, F1PPB6, F1PN38, E2R5H4, F1PBI6, F6X870, J9NVE9, E2RI13, Q9MZD3, F1PGS2, F1Q432, F1PBK6, E2QW34, E2RI99, Q0QEN2"
GO:0009605	response to external stimulus	P	5	37	9.25926	5.35456	0.188	1	OVER	"J9PB81, F1PBI6, F1PGS2, F1PGC3, C0LQL0"
GO:0016310	phosphorylation	P	5	37	9.25926	5.35456	0.188	1	OVER	"P52784, E2R5H4, F1PBI6, J9NVE9, F1PGS2"
GO:0006793	phosphorus metabolic process	P	7	58	12.963	8.39363	0.189	1	OVER	"P52784, F1PPB6, E2R5H4, F1PBI6, J9NVE9, F1PGS2, Q0QEN2"
GO:0042981	regulation of apoptotic process	P	2	11	3.7037	1.5919	0.199	1	OVER	"F1PBI6, F1PGS2"
GO:0050818	regulation of coagulation	P	2	11	3.7037	1.5919	0.199	1	OVER	"F1PBI6, F1PGS2"
GO:0043067	regulation of programmed cell death	P	2	11	3.7037	1.5919	0.199	1	OVER	"F1PBI6, F1PGS2"
GO:0007165	signal transduction	P	10	92	18.5185	13.314	0.202	1	OVER	"F1PN38, E2RIG8, F1P8G0, F1PBI6, J9NVE9, F1PBL4, F1PGS2, E2RQF8, E2RI99, C0LQL0"
GO:0005737	cytoplasm	C	14	137	25.9259	19.8263	0.204	1	OVER	"J9PB81, P52784, F1PPB6, P60529, J9NU17, J9JHF7, P60524, F1PN38, F1PBI6, Q9MZD3, F1PGS2, J9JHZ3, F1PBK6, Q0QEN2"
GO:0051271	negative regulation of cellular component movement	P	1	3	1.85185	0.434153	0.21	1	OVER	F1PBI6
GO:0032103	positive regulation of response to external stimulus	P	1	3	1.85185	0.434153	0.21	1	OVER	F1PBI6
GO:0051223	regulation of protein transport	P	1	3	1.85185	0.434153	0.21	1	OVER	F1PGS2
GO:1903318	negative regulation of protein maturation	P	1	3	1.85185	0.434153	0.21	1	OVER	F1PBI6
GO:1903317	regulation of protein maturation	P	1	3	1.85185	0.434153	0.21	1	OVER	F1PBI6
GO:1901136	carbohydrate derivative catabolic process	P	1	3	1.85185	0.434153	0.21	1	OVER	F1PPB6
GO:0009165	nucleotide biosynthetic process	P	1	3	1.85185	0.434153	0.21	1	OVER	Q0QEN2
GO:1900048	positive regulation of hemostasis	P	1	3	1.85185	0.434153	0.21	1	OVER	F1PBI6
GO:0050792	regulation of viral process	P	1	3	1.85185	0.434153	0.21	1	OVER	Q9MZD3
GO:0001667	ameboidal-type cell migration	P	1	3	1.85185	0.434153	0.21	1	OVER	F1PBI6
GO:0010955	negative regulation of protein processing	P	1	3	1.85185	0.434153	0.21	1	OVER	F1PBI6
GO:0006457	protein folding	P	1	3	1.85185	0.434153	0.21	1	OVER	Q9MZD3
GO:0045785	positive regulation of cell adhesion	P	1	3	1.85185	0.434153	0.21	1	OVER	F1PGS2
GO:0015711	organic anion transport	P	1	3	1.85185	0.434153	0.21	1	OVER	F1PBI6
GO:0002683	negative regulation of immune system process	P	1	3	1.85185	0.434153	0.21	1	OVER	F1PBI6
GO:0070201	regulation of establishment of protein localization	P	1	3	1.85185	0.434153	0.21	1	OVER	F1PGS2
GO:0005938	cell cortex	C	1	3	1.85185	0.434153	0.21	1	OVER	J9NU17
GO:0010243	response to organonitrogen compound	P	1	3	1.85185	0.434153	0.21	1	OVER	E2RI99
GO:1901698	response to nitrogen compound	P	1	3	1.85185	0.434153	0.21	1	OVER	E2RI99
GO:0019439	aromatic compound catabolic process	P	1	3	1.85185	0.434153	0.21	1	OVER	F1PPB6
GO:0008543	fibroblast growth factor receptor signaling pathway	P	1	3	1.85185	0.434153	0.21	1	OVER	F1PBI6
GO:0010817	regulation of hormone levels	P	1	3	1.85185	0.434153	0.21	1	OVER	F1PGS2
GO:0010812	negative regulation of cell-substrate adhesion	P	1	3	1.85185	0.434153	0.21	1	OVER	F1PBI6
GO:0051051	negative regulation of transport	P	1	3	1.85185	0.434153	0.21	1	OVER	F1PBI6
GO:0005884	actin filament	C	1	3	1.85185	0.434153	0.21	1	OVER	J9NU17
GO:0006953	acute-phase response	P	1	3	1.85185	0.434153	0.21	1	OVER	J9NVE9
GO:0016705	"oxidoreductase activity, acting on paired donors, with incorporation or reduction of molecular oxygen"	F	1	3	1.85185	0.434153	0.21	1	OVER	F6X870
GO:0030336	negative regulation of cell migration	P	1	3	1.85185	0.434153	0.21	1	OVER	F1PBI6
GO:0005178	integrin binding	F	1	3	1.85185	0.434153	0.21	1	OVER	F1PBI6
GO:0004064	arylesterase activity	F	1	3	1.85185	0.434153	0.21	1	OVER	F1PBK6
GO:0043394	proteoglycan binding	F	1	3	1.85185	0.434153	0.21	1	OVER	F1PBI6
GO:0044448	cell cortex part	C	1	3	1.85185	0.434153	0.21	1	OVER	J9NU17
GO:0005788	endoplasmic reticulum lumen	C	1	3	1.85185	0.434153	0.21	1	OVER	F1PBI6
GO:0006818	hydrogen transport	P	1	3	1.85185	0.434153	0.21	1	OVER	Q0QEN2
GO:0006801	superoxide metabolic process	P	1	3	1.85185	0.434153	0.21	1	OVER	F1PCG4
GO:0071774	response to fibroblast growth factor	P	1	3	1.85185	0.434153	0.21	1	OVER	F1PBI6
GO:0070613	regulation of protein processing	P	1	3	1.85185	0.434153	0.21	1	OVER	F1PBI6
GO:0030864	cortical actin cytoskeleton	C	1	3	1.85185	0.434153	0.21	1	OVER	J9NU17
GO:0030863	cortical cytoskeleton	C	1	3	1.85185	0.434153	0.21	1	OVER	J9NU17
GO:0001948	glycoprotein binding	F	1	3	1.85185	0.434153	0.21	1	OVER	F1PBI6
GO:0044344	cellular response to fibroblast growth factor stimulus	P	1	3	1.85185	0.434153	0.21	1	OVER	F1PBI6
GO:0016525	negative regulation of angiogenesis	P	1	3	1.85185	0.434153	0.21	1	OVER	F1PBI6
GO:0043236	laminin binding	F	1	3	1.85185	0.434153	0.21	1	OVER	F1PBI6
GO:0030194	positive regulation of blood coagulation	P	1	3	1.85185	0.434153	0.21	1	OVER	F1PBI6
GO:0052548	regulation of endopeptidase activity	P	1	3	1.85185	0.434153	0.21	1	OVER	F1PBI6
GO:1901343	negative regulation of vasculature development	P	1	3	1.85185	0.434153	0.21	1	OVER	F1PBI6
GO:0008285	negative regulation of cell proliferation	P	1	3	1.85185	0.434153	0.21	1	OVER	F1PBI6
GO:0007178	transmembrane receptor protein serine/threonine kinase signaling pathway	P	1	3	1.85185	0.434153	0.21	1	OVER	F1PBI6
GO:0007162	negative regulation of cell adhesion	P	1	3	1.85185	0.434153	0.21	1	OVER	F1PBI6
GO:0006012	galactose metabolic process	P	1	3	1.85185	0.434153	0.21	1	OVER	P52784
GO:0015992	proton transport	P	1	3	1.85185	0.434153	0.21	1	OVER	Q0QEN2
GO:0051347	positive regulation of transferase activity	P	1	3	1.85185	0.434153	0.21	1	OVER	F1PBI6
GO:1901293	nucleoside phosphate biosynthetic process	P	1	3	1.85185	0.434153	0.21	1	OVER	Q0QEN2
GO:0019058	viral life cycle	P	1	3	1.85185	0.434153	0.21	1	OVER	Q9MZD3
GO:0051301	cell division	P	1	3	1.85185	0.434153	0.21	1	OVER	F1PN38
GO:0051918	negative regulation of fibrinolysis	P	1	3	1.85185	0.434153	0.21	1	OVER	F1PBI6
GO:0050820	positive regulation of coagulation	P	1	3	1.85185	0.434153	0.21	1	OVER	F1PBI6
GO:2000181	negative regulation of blood vessel morphogenesis	P	1	3	1.85185	0.434153	0.21	1	OVER	F1PBI6
GO:2000146	negative regulation of cell motility	P	1	3	1.85185	0.434153	0.21	1	OVER	F1PBI6
GO:0072521	purine-containing compound metabolic process	P	3	22	5.55556	3.18379	0.227	1	OVER	"P52784, F1PBI6, Q0QEN2"
GO:0006811	ion transport	P	3	22	5.55556	3.18379	0.227	1	OVER	"F1PBI6, F1P865, Q0QEN2"
GO:0061041	regulation of wound healing	P	2	12	3.7037	1.73661	0.227	1	OVER	"F1PBI6, F1PGS2"
GO:0043603	cellular amide metabolic process	P	2	12	3.7037	1.73661	0.227	1	OVER	"F1PBI6, F6X870"
GO:0005667	transcription factor complex	C	2	12	3.7037	1.73661	0.227	1	OVER	"E2RI13, E2RI99"
GO:0022402	cell cycle process	P	2	12	3.7037	1.73661	0.227	1	OVER	"F1PN38, F1PBI6"
GO:0002684	positive regulation of immune system process	P	1	43	1.85185	6.22287	0.241	1	UNDER	F1PBI6
GO:0043229	intracellular organelle	C	16	167	29.6296	24.1679	0.242	1	OVER	"J9PB81, F1PTS8, E2QSF4, J9P6T6, J9NTJ3, J9NU17, F1PN38, E2RH23, F1PBI6, J9P716, J9NWQ5, E2RI13, F1PGS2, E2RI99, C0LQL0, Q0QEN2"
GO:0004866	endopeptidase inhibitor activity	F	0	24	0	3.47323	0.246	1	UNDER
GO:0007399	nervous system development	P	0	24	0	3.47323	0.246	1	UNDER
GO:0061135	endopeptidase regulator activity	F	0	24	0	3.47323	0.246	1	UNDER
GO:0030414	peptidase inhibitor activity	F	0	25	0	3.61795	0.247	1	UNDER
GO:0002682	regulation of immune system process	P	1	48	1.85185	6.94645	0.249	1	UNDER	F1PBI6
GO:0004857	enzyme inhibitor activity	F	0	27	0	3.90738	0.254	1	UNDER
GO:0061134	peptidase regulator activity	F	0	27	0	3.90738	0.254	1	UNDER
GO:0045184	establishment of protein localization	P	2	13	3.7037	1.88133	0.256	1	OVER	"F1Q0C1, F1PGS2"
GO:0098609	cell-cell adhesion	P	2	13	3.7037	1.88133	0.256	1	OVER	"F1PE38, F1PGS2"
GO:0010941	regulation of cell death	P	2	13	3.7037	1.88133	0.256	1	OVER	"F1PBI6, F1PGS2"
GO:0009719	response to endogenous stimulus	P	2	13	3.7037	1.88133	0.256	1	OVER	"F1PBI6, E2RI99"
GO:0015075	ion transmembrane transporter activity	F	2	13	3.7037	1.88133	0.256	1	OVER	"F1P865, Q0QEN2"
GO:0015031	protein transport	P	2	13	3.7037	1.88133	0.256	1	OVER	"F1Q0C1, F1PGS2"
GO:0006081	cellular aldehyde metabolic process	P	2	13	3.7037	1.88133	0.256	1	OVER	"P52784, F1PPB6"
GO:0098805	whole membrane	C	2	13	3.7037	1.88133	0.256	1	OVER	"J9NTJ3, J9NU17"
GO:0007049	cell cycle	P	2	13	3.7037	1.88133	0.256	1	OVER	"F1PN38, F1PBI6"
GO:0004872	receptor activity	F	0	28	0	4.0521	0.259	1	UNDER
GO:0051716	cellular response to stimulus	P	12	121	22.2222	17.5109	0.26	1	OVER	"F1PCG4, F1PN38, E2RIG8, F1P8G0, F1PBI6, J9NVE9, F1PBL4, F1PGS2, E2RQF8, E2RI99, F1PGC3, C0LQL0"
GO:1902578	single-organism localization	P	9	83	16.6667	12.0116	0.263	1	OVER	"P60529, J9JHF7, P60524, F1P8V6, F1PBI6, F1PGS2, J9JHZ3, F1P865, Q0QEN2"
GO:0043933	macromolecular complex subunit organization	P	4	29	7.40741	4.19682	0.266	1	OVER	"F1P8G0, F1PBL4, F1PGS2, F1Q432"
GO:0022607	cellular component assembly	P	4	29	7.40741	4.19682	0.266	1	OVER	"F1P8G0, F1PBI6, F1PBL4, F1PGS2"
GO:0007605	sensory perception of sound	P	1	4	1.85185	0.578871	0.27	1	OVER	J9NU17
GO:0044764	multi-organism cellular process	P	1	4	1.85185	0.578871	0.27	1	OVER	Q9MZD3
GO:0008015	blood circulation	P	1	4	1.85185	0.578871	0.27	1	OVER	F1PGS2
GO:0014070	response to organic cyclic compound	P	1	4	1.85185	0.578871	0.27	1	OVER	F1PBI6
GO:0006486	protein glycosylation	P	1	4	1.85185	0.578871	0.27	1	OVER	F1PBI6
GO:0016836	hydro-lyase activity	F	1	4	1.85185	0.578871	0.27	1	OVER	F1PBK6
GO:0016835	carbon-oxygen lyase activity	F	1	4	1.85185	0.578871	0.27	1	OVER	F1PBK6
GO:0016820	"hydrolase activity, acting on acid anhydrides, catalyzing transmembrane movement of substances"	F	1	4	1.85185	0.578871	0.27	1	OVER	Q0QEN2
GO:0002694	regulation of leukocyte activation	P	1	4	1.85185	0.578871	0.27	1	OVER	F1PBI6
GO:0004842	ubiquitin-protein transferase activity	F	1	4	1.85185	0.578871	0.27	1	OVER	F1PN38
GO:0090407	organophosphate biosynthetic process	P	1	4	1.85185	0.578871	0.27	1	OVER	Q0QEN2
GO:0098542	defense response to other organism	P	1	4	1.85185	0.578871	0.27	1	OVER	F1PGS2
GO:0015078	hydrogen ion transmembrane transporter activity	F	1	4	1.85185	0.578871	0.27	1	OVER	Q0QEN2
GO:0010810	regulation of cell-substrate adhesion	P	1	4	1.85185	0.578871	0.27	1	OVER	F1PBI6
GO:0003013	circulatory system process	P	1	4	1.85185	0.578871	0.27	1	OVER	F1PGS2
GO:0043413	macromolecule glycosylation	P	1	4	1.85185	0.578871	0.27	1	OVER	F1PBI6
GO:0090303	positive regulation of wound healing	P	1	4	1.85185	0.578871	0.27	1	OVER	F1PBI6
GO:0002526	acute inflammatory response	P	1	4	1.85185	0.578871	0.27	1	OVER	J9NVE9
GO:0000302	response to reactive oxygen species	P	1	4	1.85185	0.578871	0.27	1	OVER	F1PCG4
GO:0016032	viral process	P	1	4	1.85185	0.578871	0.27	1	OVER	Q9MZD3
GO:0070085	glycosylation	P	1	4	1.85185	0.578871	0.27	1	OVER	F1PBI6
GO:0044429	mitochondrial part	C	1	4	1.85185	0.578871	0.27	1	OVER	Q0QEN2
GO:0006820	anion transport	P	1	4	1.85185	0.578871	0.27	1	OVER	F1PBI6
GO:0040013	negative regulation of locomotion	P	1	4	1.85185	0.578871	0.27	1	OVER	F1PBI6
GO:0006804	obsolete peroxidase reaction	P	1	4	1.85185	0.578871	0.27	1	OVER	F1PCG4
GO:0004601	peroxidase activity	F	1	4	1.85185	0.578871	0.27	1	OVER	F1PCG4
GO:0000226	microtubule cytoskeleton organization	P	1	4	1.85185	0.578871	0.27	1	OVER	J9NTJ3
GO:0043903	"regulation of symbiosis, encompassing mutualism through parasitism"	P	1	4	1.85185	0.578871	0.27	1	OVER	Q9MZD3
GO:0043900	regulation of multi-organism process	P	1	4	1.85185	0.578871	0.27	1	OVER	Q9MZD3
GO:0010608	posttranscriptional regulation of gene expression	P	1	4	1.85185	0.578871	0.27	1	OVER	F1PBI6
GO:0019829	cation-transporting ATPase activity	F	1	4	1.85185	0.578871	0.27	1	OVER	Q0QEN2
GO:0015405	P-P-bond-hydrolysis-driven transmembrane transporter activity	F	1	4	1.85185	0.578871	0.27	1	OVER	Q0QEN2
GO:0042742	defense response to bacterium	P	1	4	1.85185	0.578871	0.27	1	OVER	F1PGS2
GO:0019787	ubiquitin-like protein transferase activity	F	1	4	1.85185	0.578871	0.27	1	OVER	F1PN38
GO:0050954	sensory perception of mechanical stimulus	P	1	4	1.85185	0.578871	0.27	1	OVER	J9NU17
GO:0008201	heparin binding	F	1	4	1.85185	0.578871	0.27	1	OVER	F1PBI6
GO:0015399	primary active transmembrane transporter activity	F	1	4	1.85185	0.578871	0.27	1	OVER	Q0QEN2
GO:0006000	fructose metabolic process	P	1	4	1.85185	0.578871	0.27	1	OVER	P52784
GO:0005543	phospholipid binding	F	1	4	1.85185	0.578871	0.27	1	OVER	F1PBI6
GO:0005518	collagen binding	F	1	4	1.85185	0.578871	0.27	1	OVER	F1PBI6
GO:0051338	regulation of transferase activity	P	1	4	1.85185	0.578871	0.27	1	OVER	F1PBI6
GO:0022407	regulation of cell-cell adhesion	P	1	4	1.85185	0.578871	0.27	1	OVER	F1PGS2
GO:0042626	"ATPase activity, coupled to transmembrane movement of substances"	F	1	4	1.85185	0.578871	0.27	1	OVER	Q0QEN2
GO:0042625	"ATPase activity, coupled to transmembrane movement of ions"	F	1	4	1.85185	0.578871	0.27	1	OVER	Q0QEN2
GO:0010466	negative regulation of peptidase activity	P	1	4	1.85185	0.578871	0.27	1	OVER	F1PBI6
GO:0060627	regulation of vesicle-mediated transport	P	1	4	1.85185	0.578871	0.27	1	OVER	F1PGS2
GO:0050865	regulation of cell activation	P	1	4	1.85185	0.578871	0.27	1	OVER	F1PBI6
GO:0050840	extracellular matrix binding	F	1	4	1.85185	0.578871	0.27	1	OVER	F1PBI6
GO:0051920	peroxiredoxin activity	F	1	4	1.85185	0.578871	0.27	1	OVER	F1PCG4
GO:0051917	regulation of fibrinolysis	P	1	4	1.85185	0.578871	0.27	1	OVER	F1PBI6
GO:0048545	response to steroid hormone	P	1	4	1.85185	0.578871	0.27	1	OVER	F1PBI6
GO:0044459	plasma membrane part	C	4	30	7.40741	4.34153	0.273	1	OVER	"J9NTJ3, J9NU17, F1PBI6, F1PGS2"
GO:0008270	zinc ion binding	F	4	30	7.40741	4.34153	0.273	1	OVER	"J9NYN2, E2RH23, F1PBK6, C0LQL0"
GO:2000112	regulation of cellular macromolecule biosynthetic process	P	4	31	7.40741	4.48625	0.282	1	OVER	"F1PBI6, J9NVE9, E2RI13, E2RI99"
GO:0030554	adenyl nucleotide binding	F	4	31	7.40741	4.48625	0.282	1	OVER	"P52784, J9NU17, E2R5H4, Q0QEN2"
GO:0032559	adenyl ribonucleotide binding	F	4	31	7.40741	4.48625	0.282	1	OVER	"P52784, J9NU17, E2R5H4, Q0QEN2"
GO:0005524	ATP binding	F	4	31	7.40741	4.48625	0.282	1	OVER	"P52784, J9NU17, E2R5H4, Q0QEN2"
GO:0051241	negative regulation of multicellular organismal process	P	2	14	3.7037	2.02605	0.285	1	OVER	"F1PBI6, F1PGS2"
GO:0022891	substrate-specific transmembrane transporter activity	F	2	14	3.7037	2.02605	0.285	1	OVER	"F1P865, Q0QEN2"
GO:0016773	"phosphotransferase activity, alcohol group as acceptor"	F	2	14	3.7037	2.02605	0.285	1	OVER	"P52784, E2R5H4"
GO:0015630	microtubule cytoskeleton	C	2	14	3.7037	2.02605	0.285	1	OVER	"E2QSF4, J9P716"
GO:0019219	regulation of nucleobase-containing compound metabolic process	P	4	32	7.40741	4.63097	0.292	1	OVER	"F1PBI6, J9NVE9, E2RI13, E2RI99"
GO:0019637	organophosphate metabolic process	P	4	32	7.40741	4.63097	0.292	1	OVER	"P52784, F1PPB6, F1PBI6, Q0QEN2"
GO:0044700	single organism signaling	P	10	96	18.5185	13.8929	0.294	1	OVER	"F1PN38, E2RIG8, F1P8G0, F1PBI6, J9NVE9, F1PBL4, F1PGS2, E2RQF8, E2RI99, C0LQL0"
GO:0023052	signaling	P	10	98	18.5185	14.1823	0.3	1	OVER	"F1PN38, E2RIG8, F1P8G0, F1PBI6, J9NVE9, F1PBL4, F1PGS2, E2RQF8, E2RI99, C0LQL0"
GO:0070011	"peptidase activity, acting on L-amino acid peptides"	F	2	58	3.7037	8.39363	0.3	1	UNDER	"J9PB81, E2QW34"
GO:0007154	cell communication	P	10	99	18.5185	14.3271	0.303	1	OVER	"F1PN38, E2RIG8, F1P8G0, F1PBI6, J9NVE9, F1PBL4, F1PGS2, E2RQF8, E2RI99, C0LQL0"
GO:0008233	peptidase activity	F	2	61	3.7037	8.82779	0.305	1	UNDER	"J9PB81, E2QW34"
GO:0010556	regulation of macromolecule biosynthetic process	P	4	34	7.40741	4.92041	0.314	1	OVER	"F1PBI6, J9NVE9, E2RI13, E2RI99"
GO:0003008	system process	P	2	15	3.7037	2.17077	0.315	1	OVER	"J9NU17, F1PGS2"
GO:1901566	organonitrogen compound biosynthetic process	P	2	15	3.7037	2.17077	0.315	1	OVER	"F1PBI6, Q0QEN2"
GO:0016301	kinase activity	F	2	15	3.7037	2.17077	0.315	1	OVER	"P52784, E2R5H4"
GO:0006810	transport	P	10	102	18.5185	14.7612	0.316	1	OVER	"F1Q0C1, P60529, J9JHF7, P60524, F1P8V6, F1PBI6, F1PGS2, J9JHZ3, F1P865, Q0QEN2"
GO:0046872	metal ion binding	F	11	109	20.3704	15.7742	0.32	1	OVER	"P60529, J9JHF7, P60524, F1PE38, J9NYN2, E2RH23, F1PBI6, J9NWQ5, J9JHZ3, F1PBK6, C0LQL0"
GO:0051272	positive regulation of cellular component movement	P	1	5	1.85185	0.723589	0.325	1	OVER	F1PBI6
GO:0061024	membrane organization	P	1	5	1.85185	0.723589	0.325	1	OVER	F1PBI6
GO:0045834	positive regulation of lipid metabolic process	P	1	5	1.85185	0.723589	0.325	1	OVER	J9NVE9
GO:0061695	"transferase complex, transferring phosphorus-containing groups"	C	1	5	1.85185	0.723589	0.325	1	OVER	P52784
GO:0009101	glycoprotein biosynthetic process	P	1	5	1.85185	0.723589	0.325	1	OVER	F1PBI6
GO:0009100	glycoprotein metabolic process	P	1	5	1.85185	0.723589	0.325	1	OVER	F1PBI6
GO:0050727	regulation of inflammatory response	P	1	5	1.85185	0.723589	0.325	1	OVER	C0LQL0
GO:0010942	positive regulation of cell death	P	1	5	1.85185	0.723589	0.325	1	OVER	F1PBI6
GO:1901701	cellular response to oxygen-containing compound	P	1	5	1.85185	0.723589	0.325	1	OVER	F1PCG4
GO:0045765	regulation of angiogenesis	P	1	5	1.85185	0.723589	0.325	1	OVER	F1PBI6
GO:0071363	cellular response to growth factor stimulus	P	1	5	1.85185	0.723589	0.325	1	OVER	F1PBI6
GO:0051129	negative regulation of cellular component organization	P	1	5	1.85185	0.723589	0.325	1	OVER	F1PBI6
GO:0070848	response to growth factor	P	1	5	1.85185	0.723589	0.325	1	OVER	F1PBI6
GO:0015077	monovalent inorganic cation transmembrane transporter activity	F	1	5	1.85185	0.723589	0.325	1	OVER	Q0QEN2
GO:0043492	"ATPase activity, coupled to movement of substances"	F	1	5	1.85185	0.723589	0.325	1	OVER	Q0QEN2
GO:0034109	homotypic cell-cell adhesion	P	1	5	1.85185	0.723589	0.325	1	OVER	F1PGS2
GO:0015672	monovalent inorganic cation transport	P	1	5	1.85185	0.723589	0.325	1	OVER	Q0QEN2
GO:0006979	response to oxidative stress	P	1	5	1.85185	0.723589	0.325	1	OVER	F1PCG4
GO:0030335	positive regulation of cell migration	P	1	5	1.85185	0.723589	0.325	1	OVER	F1PBI6
GO:0044433	cytoplasmic vesicle part	C	1	5	1.85185	0.723589	0.325	1	OVER	F1PBI6
GO:0044419	interspecies interaction between organisms	P	1	5	1.85185	0.723589	0.325	1	OVER	Q9MZD3
GO:1903036	positive regulation of response to wounding	P	1	5	1.85185	0.723589	0.325	1	OVER	F1PBI6
GO:0044403	"symbiosis, encompassing mutualism through parasitism"	P	1	5	1.85185	0.723589	0.325	1	OVER	Q9MZD3
GO:0040017	positive regulation of locomotion	P	1	5	1.85185	0.723589	0.325	1	OVER	F1PBI6
GO:0042803	protein homodimerization activity	F	1	5	1.85185	0.723589	0.325	1	OVER	F1PE38
GO:0019882	antigen processing and presentation	P	1	5	1.85185	0.723589	0.325	1	OVER	F1PBI6
GO:0052547	regulation of peptidase activity	P	1	5	1.85185	0.723589	0.325	1	OVER	F1PBI6
GO:1901342	regulation of vasculature development	P	1	5	1.85185	0.723589	0.325	1	OVER	F1PBI6
GO:0010564	regulation of cell cycle process	P	1	5	1.85185	0.723589	0.325	1	OVER	F1PN38
GO:0007156	homophilic cell adhesion via plasma membrane adhesion molecules	P	1	5	1.85185	0.723589	0.325	1	OVER	F1PE38
GO:0001819	positive regulation of cytokine production	P	1	5	1.85185	0.723589	0.325	1	OVER	F1PBI6
GO:0006013	mannose metabolic process	P	1	5	1.85185	0.723589	0.325	1	OVER	P52784
GO:0045321	leukocyte activation	P	1	5	1.85185	0.723589	0.325	1	OVER	F1PBI6
GO:0051346	negative regulation of hydrolase activity	P	1	5	1.85185	0.723589	0.325	1	OVER	F1PBI6
GO:0033993	response to lipid	P	1	5	1.85185	0.723589	0.325	1	OVER	F1PBI6
GO:0032880	regulation of protein localization	P	1	5	1.85185	0.723589	0.325	1	OVER	F1PGS2
GO:0098742	cell-cell adhesion via plasma-membrane adhesion molecules	P	1	5	1.85185	0.723589	0.325	1	OVER	F1PE38
GO:0009896	positive regulation of catabolic process	P	1	5	1.85185	0.723589	0.325	1	OVER	J9NVE9
GO:0043068	positive regulation of programmed cell death	P	1	5	1.85185	0.723589	0.325	1	OVER	F1PBI6
GO:0043065	positive regulation of apoptotic process	P	1	5	1.85185	0.723589	0.325	1	OVER	F1PBI6
GO:2000147	positive regulation of cell motility	P	1	5	1.85185	0.723589	0.325	1	OVER	F1PBI6
GO:1901135	carbohydrate derivative metabolic process	P	4	35	7.40741	5.06512	0.326	1	OVER	"P52784, F1PPB6, F1PBI6, Q0QEN2"
GO:0034654	nucleobase-containing compound biosynthetic process	P	4	35	7.40741	5.06512	0.326	1	OVER	"J9NVE9, E2RI13, E2RI99, Q0QEN2"
GO:0043169	cation binding	F	11	112	20.3704	16.2084	0.328	1	OVER	"P60529, J9JHF7, P60524, F1PE38, J9NYN2, E2RH23, F1PBI6, J9NWQ5, J9JHZ3, F1PBK6, C0LQL0"
GO:0002376	immune system process	P	6	121	11.1111	17.5109	0.341	1	UNDER	"J9PB81, J9P0D4, F1P9M6, F1PBI6, F1PGS2, C0LQL0"
GO:0006139	nucleobase-containing compound metabolic process	P	7	69	12.963	9.98553	0.343	1	OVER	"P52784, F1PPB6, F1PBI6, J9NVE9, E2RI13, E2RI99, Q0QEN2"
GO:0008092	cytoskeletal protein binding	F	2	16	3.7037	2.31548	0.343	1	OVER	"J9NTJ3, C0LQL0"
GO:0022857	transmembrane transporter activity	F	2	16	3.7037	2.31548	0.343	1	OVER	"F1P865, Q0QEN2"
GO:0048585	negative regulation of response to stimulus	P	2	16	3.7037	2.31548	0.343	1	OVER	"F1PBI6, F1PGS2"
GO:0006082	organic acid metabolic process	P	1	38	1.85185	5.49928	0.349	1	UNDER	P52784
GO:0006996	organelle organization	P	1	37	1.85185	5.35456	0.35	1	UNDER	J9NTJ3
GO:0043436	oxoacid metabolic process	P	1	37	1.85185	5.35456	0.35	1	UNDER	P52784
GO:0044271	cellular nitrogen compound biosynthetic process	P	5	43	9.25926	6.22287	0.362	1	OVER	"F1PBI6, J9NVE9, E2RI13, E2RI99, Q0QEN2"
GO:0051649	establishment of localization in cell	P	2	17	3.7037	2.4602	0.372	1	OVER	"F1PBI6, F1PGS2"
GO:2000113	negative regulation of cellular macromolecule biosynthetic process	P	1	6	1.85185	0.868307	0.377	1	OVER	J9NVE9
GO:0046983	protein dimerization activity	F	1	6	1.85185	0.868307	0.377	1	OVER	F1PE38
GO:0045893	"positive regulation of transcription, DNA-templated"	P	1	6	1.85185	0.868307	0.377	1	OVER	E2RI13
GO:0045892	"negative regulation of transcription, DNA-templated"	P	1	6	1.85185	0.868307	0.377	1	OVER	J9NVE9
GO:0051254	positive regulation of RNA metabolic process	P	1	6	1.85185	0.868307	0.377	1	OVER	E2RI13
GO:0051253	negative regulation of RNA metabolic process	P	1	6	1.85185	0.868307	0.377	1	OVER	J9NVE9
GO:0043604	amide biosynthetic process	P	1	6	1.85185	0.868307	0.377	1	OVER	F1PBI6
GO:0098636	protein complex involved in cell adhesion	C	1	6	1.85185	0.868307	0.377	1	OVER	F1PBI6
GO:0006412	translation	P	1	6	1.85185	0.868307	0.377	1	OVER	F1PBI6
GO:0051172	negative regulation of nitrogen compound metabolic process	P	1	6	1.85185	0.868307	0.377	1	OVER	J9NVE9
GO:0001525	angiogenesis	P	1	6	1.85185	0.868307	0.377	1	OVER	F1PBI6
GO:0045095	keratin filament	C	1	6	1.85185	0.868307	0.377	1	OVER	F1PTS8
GO:1901681	sulfur compound binding	F	1	6	1.85185	0.868307	0.377	1	OVER	F1PBI6
GO:0022804	active transmembrane transporter activity	F	1	6	1.85185	0.868307	0.377	1	OVER	Q0QEN2
GO:0051093	negative regulation of developmental process	P	1	6	1.85185	0.868307	0.377	1	OVER	F1PBI6
GO:0051050	positive regulation of transport	P	1	6	1.85185	0.868307	0.377	1	OVER	F1PGS2
GO:1902680	positive regulation of RNA biosynthetic process	P	1	6	1.85185	0.868307	0.377	1	OVER	E2RI13
GO:1902679	negative regulation of RNA biosynthetic process	P	1	6	1.85185	0.868307	0.377	1	OVER	J9NVE9
GO:0016684	"oxidoreductase activity, acting on peroxide as acceptor"	F	1	6	1.85185	0.868307	0.377	1	OVER	F1PCG4
GO:0044432	endoplasmic reticulum part	C	1	6	1.85185	0.868307	0.377	1	OVER	F1PBI6
GO:0032446	protein modification by small protein conjugation	P	1	6	1.85185	0.868307	0.377	1	OVER	F1PN38
GO:0031347	regulation of defense response	P	1	6	1.85185	0.868307	0.377	1	OVER	C0LQL0
GO:0070647	protein modification by small protein conjugation or removal	P	1	6	1.85185	0.868307	0.377	1	OVER	F1PN38
GO:0071705	nitrogen compound transport	P	1	6	1.85185	0.868307	0.377	1	OVER	F1PGS2
GO:0008305	integrin complex	C	1	6	1.85185	0.868307	0.377	1	OVER	F1PBI6
GO:0019838	growth factor binding	F	1	6	1.85185	0.868307	0.377	1	OVER	F1PBI6
GO:0016567	protein ubiquitination	P	1	6	1.85185	0.868307	0.377	1	OVER	F1PN38
GO:1990234	transferase complex	C	1	6	1.85185	0.868307	0.377	1	OVER	P52784
GO:1903508	positive regulation of nucleic acid-templated transcription	P	1	6	1.85185	0.868307	0.377	1	OVER	E2RI13
GO:1903507	negative regulation of nucleic acid-templated transcription	P	1	6	1.85185	0.868307	0.377	1	OVER	J9NVE9
GO:0016459	myosin complex	C	1	6	1.85185	0.868307	0.377	1	OVER	J9NU17
GO:0090066	regulation of anatomical structure size	P	1	6	1.85185	0.868307	0.377	1	OVER	F1PGS2
GO:0005539	glycosaminoglycan binding	F	1	6	1.85185	0.868307	0.377	1	OVER	F1PBI6
GO:0045934	negative regulation of nucleobase-containing compound metabolic process	P	1	6	1.85185	0.868307	0.377	1	OVER	J9NVE9
GO:0009894	regulation of catabolic process	P	1	6	1.85185	0.868307	0.377	1	OVER	J9NVE9
GO:0043043	peptide biosynthetic process	P	1	6	1.85185	0.868307	0.377	1	OVER	F1PBI6
GO:0044767	single-organism developmental process	P	4	85	7.40741	12.301	0.382	1	UNDER	"E2R5H4, F1PBI6, J9NVT1, E2RI99"
GO:0032502	developmental process	P	4	86	7.40741	12.4457	0.382	1	UNDER	"E2R5H4, F1PBI6, J9NVT1, E2RI99"
GO:1901605	alpha-amino acid metabolic process	P	0	18	0	2.60492	0.387	1	UNDER
GO:0048878	chemical homeostasis	P	0	18	0	2.60492	0.387	1	UNDER
GO:0006520	cellular amino acid metabolic process	P	0	20	0	2.89436	0.39	1	UNDER
GO:0048468	cell development	P	0	20	0	2.89436	0.39	1	UNDER
GO:0005654	nucleoplasm	C	0	21	0	3.03907	0.394	1	UNDER
GO:0044446	intracellular organelle part	C	9	92	16.6667	13.314	0.395	1	OVER	"F1PTS8, E2QSF4, J9NTJ3, J9NU17, F1PBI6, J9P716, E2RI99, C0LQL0, Q0QEN2"
GO:0044422	organelle part	C	9	94	16.6667	13.6035	0.402	1	OVER	"F1PTS8, E2QSF4, J9NTJ3, J9NU17, F1PBI6, J9P716, E2RI99, C0LQL0, Q0QEN2"
GO:0051641	cellular localization	P	3	23	5.55556	3.32851	0.407	1	OVER	"J9NU17, F1PBI6, F1PGS2"
GO:0005615	extracellular space	C	5	96	9.25926	13.8929	0.412	1	UNDER	"F1P8G0, F1PBI6, F1PBL4, F1PGS2, E2RQF8"
GO:0051234	establishment of localization	P	10	103	18.5185	14.9059	0.416	1	OVER	"F1Q0C1, P60529, J9JHF7, P60524, F1P8V6, F1PBI6, F1PGS2, J9JHZ3, F1P865, Q0QEN2"
GO:0031224	intrinsic component of membrane	C	2	51	3.7037	7.38061	0.416	1	UNDER	"J9NZW6, F1PBI6"
GO:0071495	cellular response to endogenous stimulus	P	1	7	1.85185	1.01302	0.424	1	OVER	F1PBI6
GO:0045861	negative regulation of proteolysis	P	1	7	1.85185	1.01302	0.424	1	OVER	F1PBI6
GO:0016209	antioxidant activity	F	1	7	1.85185	1.01302	0.424	1	OVER	F1PCG4
GO:0003774	motor activity	F	1	7	1.85185	1.01302	0.424	1	OVER	J9NU17
GO:0009617	response to bacterium	P	1	7	1.85185	1.01302	0.424	1	OVER	F1PGS2
GO:0060326	cell chemotaxis	P	1	7	1.85185	1.01302	0.424	1	OVER	F1PBI6
GO:0031327	negative regulation of cellular biosynthetic process	P	1	7	1.85185	1.01302	0.424	1	OVER	J9NVE9
GO:0007267	cell-cell signaling	P	1	7	1.85185	1.01302	0.424	1	OVER	F1PGS2
GO:0045454	cell redox homeostasis	P	1	7	1.85185	1.01302	0.424	1	OVER	F1PCG4
GO:0010558	negative regulation of macromolecule biosynthetic process	P	1	7	1.85185	1.01302	0.424	1	OVER	J9NVE9
GO:0098802	plasma membrane receptor complex	C	1	7	1.85185	1.01302	0.424	1	OVER	F1PBI6
GO:0044242	cellular lipid catabolic process	P	1	7	1.85185	1.01302	0.424	1	OVER	J9NVE9
GO:0045935	positive regulation of nucleobase-containing compound metabolic process	P	1	7	1.85185	1.01302	0.424	1	OVER	E2RI13
GO:0009890	negative regulation of biosynthetic process	P	1	7	1.85185	1.01302	0.424	1	OVER	J9NVE9
GO:0043086	negative regulation of catalytic activity	P	1	7	1.85185	1.01302	0.424	1	OVER	F1PBI6
GO:0043085	positive regulation of catalytic activity	P	1	7	1.85185	1.01302	0.424	1	OVER	F1PBI6
GO:0048514	blood vessel morphogenesis	P	1	7	1.85185	1.01302	0.424	1	OVER	F1PBI6
GO:0032268	regulation of cellular protein metabolic process	P	3	25	5.55556	3.61795	0.426	1	OVER	"F1PBI6, J9NVE9, F1PGS2"
GO:0043226	organelle	C	21	242	38.8889	35.0217	0.448	1	OVER	"J9PB81, F1PTS8, E2QSF4, J9P6T6, J9NTJ3, J9NU17, F1PN38, J9NYN2, E2RH23, F1PBI6, J9P716, J9NWQ5, E2RI13, F1P6P2, Q9MZD3, F1PGS2, F5XVB0, F1PBK6, E2RI99, C0LQL0, Q0QEN2"
GO:0043232	intracellular non-membrane-bounded organelle	C	6	62	11.1111	8.9725	0.453	1	OVER	"F1PTS8, E2QSF4, J9NTJ3, J9NU17, J9P716, C0LQL0"
GO:0043228	non-membrane-bounded organelle	C	6	62	11.1111	8.9725	0.453	1	OVER	"F1PTS8, E2QSF4, J9NTJ3, J9NU17, J9P716, C0LQL0"
GO:0006355	"regulation of transcription, DNA-templated"	P	3	28	5.55556	4.0521	0.461	1	OVER	"J9NVE9, E2RI13, E2RI99"
GO:0010033	response to organic substance	P	3	28	5.55556	4.0521	0.461	1	OVER	"F1PBI6, E2RI99, F1PGC3"
GO:1903506	regulation of nucleic acid-templated transcription	P	3	28	5.55556	4.0521	0.461	1	OVER	"J9NVE9, E2RI13, E2RI99"
GO:0006955	immune response	P	3	64	5.55556	9.26194	0.463	1	UNDER	"F1PBI6, F1PGS2, C0LQL0"
GO:0031988	membrane-bounded vesicle	C	3	68	5.55556	9.84081	0.465	1	UNDER	"F1PBI6, F1PGS2, F1PBK6"
GO:0044702	single organism reproductive process	P	1	8	1.85185	1.15774	0.468	1	OVER	J9NVT1
GO:0098662	inorganic cation transmembrane transport	P	1	8	1.85185	1.15774	0.468	1	OVER	Q0QEN2
GO:0098660	inorganic ion transmembrane transport	P	1	8	1.85185	1.15774	0.468	1	OVER	Q0QEN2
GO:0098655	cation transmembrane transport	P	1	8	1.85185	1.15774	0.468	1	OVER	Q0QEN2
GO:0001568	blood vessel development	P	1	8	1.85185	1.15774	0.468	1	OVER	F1PBI6
GO:0060341	regulation of cellular localization	P	1	8	1.85185	1.15774	0.468	1	OVER	F1PGS2
GO:0005739	mitochondrion	C	1	8	1.85185	1.15774	0.468	1	OVER	Q0QEN2
GO:0019216	regulation of lipid metabolic process	P	1	8	1.85185	1.15774	0.468	1	OVER	J9NVE9
GO:0042802	identical protein binding	F	1	8	1.85185	1.15774	0.468	1	OVER	F1PE38
GO:0007264	small GTPase mediated signal transduction	P	1	8	1.85185	1.15774	0.468	1	OVER	E2RIG8
GO:0001817	regulation of cytokine production	P	1	8	1.85185	1.15774	0.468	1	OVER	F1PBI6
GO:0001816	cytokine production	P	1	8	1.85185	1.15774	0.468	1	OVER	F1PBI6
GO:0046434	organophosphate catabolic process	P	1	8	1.85185	1.15774	0.468	1	OVER	F1PPB6
GO:0022414	reproductive process	P	1	8	1.85185	1.15774	0.468	1	OVER	J9NVT1
GO:0016337	single organismal cell-cell adhesion	P	1	8	1.85185	1.15774	0.468	1	OVER	F1PGS2
GO:0019538	protein metabolic process	P	8	141	14.8148	20.4052	0.473	1	UNDER	"J9PB81, F1PN38, E2R5H4, F1PBI6, J9NVE9, Q9MZD3, F1PGS2, E2QW34"
GO:2001141	regulation of RNA biosynthetic process	P	3	29	5.55556	4.19682	0.474	1	OVER	"J9NVE9, E2RI13, E2RI99"
GO:0051252	regulation of RNA metabolic process	P	3	30	5.55556	4.34153	0.488	1	OVER	"J9NVE9, E2RI13, E2RI99"
GO:0051246	regulation of protein metabolic process	P	3	30	5.55556	4.34153	0.488	1	OVER	"F1PBI6, J9NVE9, F1PGS2"
GO:0046483	heterocycle metabolic process	P	7	76	12.963	10.9986	0.496	1	OVER	"P52784, F1PPB6, F1PBI6, J9NVE9, E2RI13, E2RI99, Q0QEN2"
GO:0006629	lipid metabolic process	P	1	32	1.85185	4.63097	0.502	1	UNDER	J9NVE9
GO:0006351	"transcription, DNA-templated"	P	3	31	5.55556	4.48625	0.502	1	OVER	"J9NVE9, E2RI13, E2RI99"
GO:0071702	organic substance transport	P	3	31	5.55556	4.48625	0.502	1	OVER	"F1Q0C1, F1PBI6, F1PGS2"
GO:0097659	nucleic acid-templated transcription	P	3	31	5.55556	4.48625	0.502	1	OVER	"J9NVE9, E2RI13, E2RI99"
GO:0044428	nuclear part	C	1	33	1.85185	4.77569	0.502	1	UNDER	E2RI99
GO:0006950	response to stress	P	8	83	14.8148	12.0116	0.503	1	OVER	"F1PCG4, F1P8G0, F1PBI6, J9NVE9, F1PBL4, F1PGS2, F5XVB0, C0LQL0"
GO:0009653	anatomical structure morphogenesis	P	1	35	1.85185	5.06512	0.507	1	UNDER	F1PBI6
GO:0019752	carboxylic acid metabolic process	P	1	35	1.85185	5.06512	0.507	1	UNDER	P52784
GO:0034641	cellular nitrogen compound metabolic process	P	8	85	14.8148	12.301	0.508	1	OVER	"P52784, F1PPB6, F1PBI6, F6X870, J9NVE9, E2RI13, E2RI99, Q0QEN2"
GO:0007600	sensory perception	P	1	9	1.85185	1.30246	0.509	1	OVER	J9NU17
GO:0044087	regulation of cellular component biogenesis	P	1	9	1.85185	1.30246	0.509	1	OVER	F1PBI6
GO:0098602	single organism cell adhesion	P	1	9	1.85185	1.30246	0.509	1	OVER	F1PGS2
GO:0009725	response to hormone	P	1	9	1.85185	1.30246	0.509	1	OVER	F1PBI6
GO:0016853	isomerase activity	F	1	9	1.85185	1.30246	0.509	1	OVER	Q9MZD3
GO:0045087	innate immune response	P	1	9	1.85185	1.30246	0.509	1	OVER	C0LQL0
GO:0030334	regulation of cell migration	P	1	9	1.85185	1.30246	0.509	1	OVER	F1PBI6
GO:0004672	protein kinase activity	F	1	9	1.85185	1.30246	0.509	1	OVER	E2R5H4
GO:0032368	regulation of lipid transport	P	1	9	1.85185	1.30246	0.509	1	OVER	F1PBI6
GO:0042623	"ATPase activity, coupled"	F	1	9	1.85185	1.30246	0.509	1	OVER	Q0QEN2
GO:0050877	neurological system process	P	1	9	1.85185	1.30246	0.509	1	OVER	J9NU17
GO:2000145	regulation of cell motility	P	1	9	1.85185	1.30246	0.509	1	OVER	F1PBI6
GO:0051171	regulation of nitrogen compound metabolic process	P	4	37	7.40741	5.35456	0.515	1	OVER	"F1PBI6, J9NVE9, E2RI13, E2RI99"
GO:0019438	aromatic compound biosynthetic process	P	4	37	7.40741	5.35456	0.515	1	OVER	"J9NVE9, E2RI13, E2RI99, Q0QEN2"
GO:0031326	regulation of cellular biosynthetic process	P	4	37	7.40741	5.35456	0.515	1	OVER	"F1PBI6, J9NVE9, E2RI13, E2RI99"
GO:0018130	heterocycle biosynthetic process	P	4	37	7.40741	5.35456	0.515	1	OVER	"J9NVE9, E2RI13, E2RI99, Q0QEN2"
GO:1901362	organic cyclic compound biosynthetic process	P	4	37	7.40741	5.35456	0.515	1	OVER	"J9NVE9, E2RI13, E2RI99, Q0QEN2"
GO:0043227	membrane-bounded organelle	C	12	190	22.2222	27.4964	0.519	1	UNDER	"J9PB81, J9P6T6, J9NYN2, E2RH23, F1PBI6, E2RI13, Q9MZD3, F1PGS2, F5XVB0, F1PBK6, E2RI99, Q0QEN2"
GO:0010468	regulation of gene expression	P	4	38	7.40741	5.49928	0.52	1	OVER	"F1PBI6, J9NVE9, E2RI13, E2RI99"
GO:0044085	cellular component biogenesis	P	4	39	7.40741	5.64399	0.526	1	OVER	"F1P8G0, F1PBI6, F1PBL4, F1PGS2"
GO:0009889	regulation of biosynthetic process	P	4	39	7.40741	5.64399	0.526	1	OVER	"F1PBI6, J9NVE9, E2RI13, E2RI99"
GO:0044444	cytoplasmic part	C	9	96	16.6667	13.8929	0.53	1	OVER	"P52784, P60529, J9NU17, J9JHF7, P60524, F1PBI6, F1PGS2, J9JHZ3, Q0QEN2"
GO:0005488	binding	F	37	460	68.5185	66.5702	0.535	1	OVER	"P52784, J9P0D4, E2QSF4, P60529, J9NTJ3, J9NU17, J9JHF7, P60524, F1P9M6, F1PF31, F1PN38, F1P8A6, F1PE38, J9NYN2, E2RIG8, E2RH23, F1P8G0, E2R5H4, F1P8V6, E2RP87, F1PBI6, J9P716, F6X870, F1PBL4, J9NWQ5, F1P6P2, F1PGS2, F5XVB0, J9NVT1, J9JHZ3, F1Q432, E2RQF8, F1PBK6, E2RI99, F1PGC3, C0LQL0, Q0QEN2"
GO:0051270	regulation of cellular component movement	P	1	10	1.85185	1.44718	0.546	1	OVER	F1PBI6
GO:0072562	blood microparticle	C	1	10	1.85185	1.44718	0.546	1	OVER	F1PGS2
GO:0044092	negative regulation of molecular function	P	1	10	1.85185	1.44718	0.546	1	OVER	F1PBI6
GO:0040012	regulation of locomotion	P	1	10	1.85185	1.44718	0.546	1	OVER	F1PBI6
GO:0001944	vasculature development	P	1	10	1.85185	1.44718	0.546	1	OVER	F1PBI6
GO:0043235	receptor complex	C	1	10	1.85185	1.44718	0.546	1	OVER	F1PBI6
GO:0032269	negative regulation of cellular protein metabolic process	P	1	10	1.85185	1.44718	0.546	1	OVER	F1PBI6
GO:0006952	defense response	P	4	42	7.40741	6.07815	0.548	1	OVER	"F1PBI6, J9NVE9, F1PGS2, C0LQL0"
GO:0065007	biological regulation	P	20	297	37.037	42.9812	0.558	1	UNDER	"F1PDY8, F1PCG4, J9NTJ3, F1PF31, F1PN38, F1PE38, E2RIG8, F1P8G0, E2R5H4, F1PBI6, J9NVE9, F1PBL4, J9NWQ5, E2RI13, Q9MZD3, F1PGS2, F5XVB0, E2RQF8, E2RI99, C0LQL0"
GO:0005515	protein binding	F	26	313	48.1481	45.2967	0.56	1	OVER	"P52784, J9P0D4, J9NTJ3, J9NU17, F1P9M6, F1PF31, F1PN38, F1P8A6, F1PE38, E2RH23, F1P8G0, E2R5H4, E2RP87, F1PBI6, F6X870, F1PBL4, J9NWQ5, F1P6P2, F1PGS2, F5XVB0, J9NVT1, F1Q432, E2RQF8, F1PBK6, F1PGC3, C0LQL0"
GO:0003676	nucleic acid binding	F	2	48	3.7037	6.94645	0.569	1	UNDER	"E2RI99, F1PGC3"
GO:0048518	positive regulation of biological process	P	11	123	20.3704	17.8003	0.57	1	OVER	"F1PDY8, F1PE38, F1P8G0, E2R5H4, F1PBI6, J9NVE9, F1PBL4, E2RI13, F1PGS2, E2RI99, C0LQL0"
GO:0004175	endopeptidase activity	F	2	49	3.7037	7.09117	0.571	1	UNDER	"J9PB81, E2QW34"
GO:0016021	integral component of membrane	C	2	49	3.7037	7.09117	0.571	1	UNDER	"J9NZW6, F1PBI6"
GO:0051248	negative regulation of protein metabolic process	P	1	11	1.85185	1.5919	0.581	1	OVER	F1PBI6
GO:0044093	positive regulation of molecular function	P	1	11	1.85185	1.5919	0.581	1	OVER	F1PBI6
GO:0045111	intermediate filament cytoskeleton	C	1	11	1.85185	1.5919	0.581	1	OVER	F1PTS8
GO:0016887	ATPase activity	F	1	11	1.85185	1.5919	0.581	1	OVER	Q0QEN2
GO:0022890	inorganic cation transmembrane transporter activity	F	1	11	1.85185	1.5919	0.581	1	OVER	Q0QEN2
GO:0005882	intermediate filament	C	1	11	1.85185	1.5919	0.581	1	OVER	F1PTS8
GO:0042330	taxis	P	1	11	1.85185	1.5919	0.581	1	OVER	F1PBI6
GO:0006935	chemotaxis	P	1	11	1.85185	1.5919	0.581	1	OVER	F1PBI6
GO:0016042	lipid catabolic process	P	1	11	1.85185	1.5919	0.581	1	OVER	J9NVE9
GO:0005783	endoplasmic reticulum	C	1	11	1.85185	1.5919	0.581	1	OVER	F1PBI6
GO:0008324	cation transmembrane transporter activity	F	1	11	1.85185	1.5919	0.581	1	OVER	Q0QEN2
GO:0030162	regulation of proteolysis	P	1	11	1.85185	1.5919	0.581	1	OVER	F1PBI6
GO:0007169	transmembrane receptor protein tyrosine kinase signaling pathway	P	1	11	1.85185	1.5919	0.581	1	OVER	F1PBI6
GO:0048646	anatomical structure formation involved in morphogenesis	P	1	11	1.85185	1.5919	0.581	1	OVER	F1PBI6
GO:0051179	localization	P	11	129	20.3704	18.6686	0.584	1	OVER	"F1Q0C1, P60529, J9NU17, J9JHF7, P60524, F1P8V6, F1PBI6, F1PGS2, J9JHZ3, F1P865, Q0QEN2"
GO:0010467	gene expression	P	5	53	9.25926	7.67004	0.585	1	OVER	"F1PBI6, J9NVE9, E2RI13, F1PGS2, E2RI99"
GO:0070062	extracellular exosome	C	3	61	5.55556	8.82779	0.611	1	UNDER	"F1PBI6, F1PGS2, F1PBK6"
GO:0065010	extracellular membrane-bounded organelle	C	3	61	5.55556	8.82779	0.611	1	UNDER	"F1PBI6, F1PGS2, F1PBK6"
GO:0043230	extracellular organelle	C	3	61	5.55556	8.82779	0.611	1	UNDER	"F1PBI6, F1PGS2, F1PBK6"
GO:1903561	extracellular vesicle	C	3	61	5.55556	8.82779	0.611	1	UNDER	"F1PBI6, F1PGS2, F1PBK6"
GO:0051094	positive regulation of developmental process	P	1	12	1.85185	1.73661	0.613	1	OVER	F1PBI6
GO:0072359	circulatory system development	P	1	12	1.85185	1.73661	0.613	1	OVER	F1PBI6
GO:0072358	cardiovascular system development	P	1	12	1.85185	1.73661	0.613	1	OVER	F1PBI6
GO:0042995	cell projection	C	1	12	1.85185	1.73661	0.613	1	OVER	J9NU17
GO:0033554	cellular response to stress	P	1	12	1.85185	1.73661	0.613	1	OVER	F1PCG4
GO:0052689	carboxylic ester hydrolase activity	F	1	12	1.85185	1.73661	0.613	1	OVER	F1PBK6
GO:0007167	enzyme linked receptor protein signaling pathway	P	1	12	1.85185	1.73661	0.613	1	OVER	F1PBI6
GO:0038023	signaling receptor activity	F	0	13	0	1.88133	0.614	1	UNDER
GO:0000902	cell morphogenesis	P	0	13	0	1.88133	0.614	1	UNDER
GO:0030182	neuron differentiation	P	0	13	0	1.88133	0.614	1	UNDER
GO:0030001	metal ion transport	P	0	13	0	1.88133	0.614	1	UNDER
GO:0051130	positive regulation of cellular component organization	P	0	14	0	2.02605	0.615	1	UNDER
GO:0045595	regulation of cell differentiation	P	0	14	0	2.02605	0.615	1	UNDER
GO:0030054	cell junction	C	0	14	0	2.02605	0.615	1	UNDER
GO:0022008	neurogenesis	P	0	15	0	2.17077	0.619	1	UNDER
GO:0032989	cellular component morphogenesis	P	0	15	0	2.17077	0.619	1	UNDER
GO:0048699	generation of neurons	P	0	15	0	2.17077	0.619	1	UNDER
GO:0002252	immune effector process	P	0	15	0	2.17077	0.619	1	UNDER
GO:0030030	cell projection organization	P	0	17	0	2.4602	0.631	1	UNDER
GO:0051240	positive regulation of multicellular organismal process	P	2	18	3.7037	2.60492	0.639	1	OVER	"F1PBI6, F1PGS2"
GO:0009199	ribonucleoside triphosphate metabolic process	P	2	18	3.7037	2.60492	0.639	1	OVER	"P52784, Q0QEN2"
GO:0009167	purine ribonucleoside monophosphate metabolic process	P	2	18	3.7037	2.60492	0.639	1	OVER	"P52784, Q0QEN2"
GO:0009161	ribonucleoside monophosphate metabolic process	P	2	18	3.7037	2.60492	0.639	1	OVER	"P52784, Q0QEN2"
GO:0009144	purine nucleoside triphosphate metabolic process	P	2	18	3.7037	2.60492	0.639	1	OVER	"P52784, Q0QEN2"
GO:0009141	nucleoside triphosphate metabolic process	P	2	18	3.7037	2.60492	0.639	1	OVER	"P52784, Q0QEN2"
GO:0009126	purine nucleoside monophosphate metabolic process	P	2	18	3.7037	2.60492	0.639	1	OVER	"P52784, Q0QEN2"
GO:0009123	nucleoside monophosphate metabolic process	P	2	18	3.7037	2.60492	0.639	1	OVER	"P52784, Q0QEN2"
GO:0009119	ribonucleoside metabolic process	P	2	18	3.7037	2.60492	0.639	1	OVER	"P52784, Q0QEN2"
GO:0009116	nucleoside metabolic process	P	2	18	3.7037	2.60492	0.639	1	OVER	"P52784, Q0QEN2"
GO:1901657	glycosyl compound metabolic process	P	2	18	3.7037	2.60492	0.639	1	OVER	"P52784, Q0QEN2"
GO:0046128	purine ribonucleoside metabolic process	P	2	18	3.7037	2.60492	0.639	1	OVER	"P52784, Q0QEN2"
GO:0016772	"transferase activity, transferring phosphorus-containing groups"	F	2	18	3.7037	2.60492	0.639	1	OVER	"P52784, E2R5H4"
GO:0051049	regulation of transport	P	2	18	3.7037	2.60492	0.639	1	OVER	"F1PBI6, F1PGS2"
GO:0046034	ATP metabolic process	P	2	18	3.7037	2.60492	0.639	1	OVER	"P52784, Q0QEN2"
GO:0042278	purine nucleoside metabolic process	P	2	18	3.7037	2.60492	0.639	1	OVER	"P52784, Q0QEN2"
GO:0031324	negative regulation of cellular metabolic process	P	2	18	3.7037	2.60492	0.639	1	OVER	"F1PBI6, J9NVE9"
GO:0009205	purine ribonucleoside triphosphate metabolic process	P	2	18	3.7037	2.60492	0.639	1	OVER	"P52784, Q0QEN2"
GO:0031982	vesicle	C	4	73	7.40741	10.5644	0.64	1	UNDER	"F1PBI6, F1P6P2, F1PGS2, F1PBK6"
GO:0006508	proteolysis	P	4	71	7.40741	10.275	0.64	1	UNDER	"J9PB81, F1PBI6, F1PGS2, E2QW34"
GO:0048856	anatomical structure development	P	4	74	7.40741	10.7091	0.641	1	UNDER	"E2R5H4, F1PBI6, J9NVT1, E2RI99"
GO:0050794	regulation of cellular process	P	18	220	33.3333	31.8379	0.645	1	OVER	"F1PDY8, F1PCG4, F1PF31, F1PN38, F1PE38, E2RIG8, F1P8G0, E2R5H4, F1PBI6, J9NVE9, F1PBL4, J9NWQ5, E2RI13, Q9MZD3, F1PGS2, E2RQF8, E2RI99, C0LQL0"
GO:0006725	cellular aromatic compound metabolic process	P	7	77	12.963	11.1433	0.645	1	OVER	"P52784, F1PPB6, F1PBI6, J9NVE9, E2RI13, E2RI99, Q0QEN2"
GO:0044267	cellular protein metabolic process	P	7	77	12.963	11.1433	0.645	1	OVER	"F1PN38, E2R5H4, F1PBI6, J9NVE9, Q9MZD3, F1PGS2, E2QW34"
GO:0050896	response to stimulus	P	15	221	27.7778	31.9826	0.645	1	UNDER	"J9PB81, F1PDY8, F1PCG4, F1PN38, E2RIG8, F1P8G0, F1PBI6, J9NVE9, F1PBL4, F1PGS2, F5XVB0, E2RQF8, E2RI99, F1PGC3, C0LQL0"
GO:0010605	negative regulation of macromolecule metabolic process	P	2	19	3.7037	2.74964	0.648	1	OVER	"F1PBI6, J9NVE9"
GO:0046496	nicotinamide nucleotide metabolic process	P	2	19	3.7037	2.74964	0.648	1	OVER	"P52784, F1PPB6"
GO:0050789	regulation of biological process	P	18	261	33.3333	37.7713	0.656	1	UNDER	"F1PDY8, F1PCG4, F1PF31, F1PN38, F1PE38, E2RIG8, F1P8G0, E2R5H4, F1PBI6, J9NVE9, F1PBL4, J9NWQ5, E2RI13, Q9MZD3, F1PGS2, E2RQF8, E2RI99, C0LQL0"
GO:0072524	pyridine-containing compound metabolic process	P	2	20	3.7037	2.89436	0.658	1	OVER	"P52784, F1PPB6"
GO:0022892	substrate-specific transporter activity	F	2	20	3.7037	2.89436	0.658	1	OVER	"F1P865, Q0QEN2"
GO:0019362	pyridine nucleotide metabolic process	P	2	20	3.7037	2.89436	0.658	1	OVER	"P52784, F1PPB6"
GO:0006733	oxidoreduction coenzyme metabolic process	P	2	20	3.7037	2.89436	0.658	1	OVER	"P52784, F1PPB6"
GO:0044763	single-organism cellular process	P	24	293	44.4444	42.4023	0.66	1	OVER	"F1PDY8, F1PCG4, P52784, E2QSF4, F1PPB6, J9NTJ3, F1PN38, F1PE38, E2RIG8, F1P8G0, E2R5H4, F1PBI6, J9P716, J9NVE9, F1PBL4, F1PGS2, J9NVT1, F1Q432, E2RQF8, F1PBK6, F1P865, E2RI99, C0LQL0, Q0QEN2"
GO:0019222	regulation of metabolic process	P	5	88	9.25926	12.7352	0.665	1	UNDER	"F1PBI6, J9NVE9, E2RI13, F1PGS2, E2RI99"
GO:0006732	coenzyme metabolic process	P	2	21	3.7037	3.03907	0.668	1	OVER	"P52784, F1PPB6"
GO:0008289	lipid binding	F	2	21	3.7037	3.03907	0.668	1	OVER	"F1PBI6, C0LQL0"
GO:0098796	membrane protein complex	C	2	21	3.7037	3.03907	0.668	1	OVER	"F1PBI6, Q0QEN2"
GO:0008104	protein localization	P	2	21	3.7037	3.03907	0.668	1	OVER	"F1Q0C1, F1PGS2"
GO:0051186	cofactor metabolic process	P	2	23	3.7037	3.32851	0.69	1	OVER	"P52784, F1PPB6"
GO:0009892	negative regulation of metabolic process	P	2	24	3.7037	3.47323	0.701	1	OVER	"F1PBI6, J9NVE9"
GO:0016787	hydrolase activity	F	8	124	14.8148	17.945	0.709	1	UNDER	"J9PB81, E2QSF4, J9NU17, J9P716, E2RRU2, F1PBK6, E2QW34, Q0QEN2"
GO:0048513	organ development	P	1	26	1.85185	3.76266	0.713	1	UNDER	J9NVT1
GO:0051128	regulation of cellular component organization	P	1	27	1.85185	3.90738	0.713	1	UNDER	F1PBI6
GO:0004252	serine-type endopeptidase activity	F	1	28	1.85185	4.0521	0.714	1	UNDER	J9PB81
GO:0017171	serine hydrolase activity	F	1	28	1.85185	4.0521	0.714	1	UNDER	J9PB81
GO:0006897	endocytosis	P	1	28	1.85185	4.0521	0.714	1	UNDER	F1PBI6
GO:0008236	serine-type peptidase activity	F	1	28	1.85185	4.0521	0.714	1	UNDER	J9PB81
GO:0065009	regulation of molecular function	P	1	29	1.85185	4.19682	0.717	1	UNDER	F1PBI6
GO:0042592	homeostatic process	P	1	30	1.85185	4.34153	0.719	1	UNDER	F1PCG4
GO:0031981	nuclear lumen	C	1	31	1.85185	4.48625	0.723	1	UNDER	E2RI99
GO:0060089	molecular transducer activity	F	1	31	1.85185	4.48625	0.723	1	UNDER	E2RI99
GO:0032774	RNA biosynthetic process	P	3	32	5.55556	4.63097	0.727	1	OVER	"J9NVE9, E2RI13, E2RI99"
GO:0044712	single-organism catabolic process	P	3	35	5.55556	5.06512	0.741	1	OVER	"P52784, F1PPB6, J9NVE9"
GO:0044248	cellular catabolic process	P	3	35	5.55556	5.06512	0.741	1	OVER	"F1PPB6, J9NVE9, E2QW34"
GO:0033036	macromolecule localization	P	3	36	5.55556	5.20984	0.747	1	OVER	"F1Q0C1, F1PBI6, F1PGS2"
GO:0051239	regulation of multicellular organismal process	P	2	41	3.7037	5.93343	0.761	1	UNDER	"F1PBI6, F1PGS2"
GO:0005509	calcium ion binding	F	4	45	7.40741	6.5123	0.767	1	OVER	"F1PE38, F1PBI6, J9NWQ5, C0LQL0"
GO:0034645	cellular macromolecule biosynthetic process	P	4	49	7.40741	7.09117	0.78	1	OVER	"F1PBI6, J9NVE9, E2RI13, E2RI99"
GO:0005886	plasma membrane	C	4	50	7.40741	7.23589	0.784	1	OVER	"J9NTJ3, J9NU17, F1PBI6, F1PGS2"
GO:0048584	positive regulation of response to stimulus	P	3	52	5.55556	7.52533	0.788	1	UNDER	"F1PBI6, J9NVE9, F1PGS2"
GO:0044281	small molecule metabolic process	P	5	63	9.25926	9.11722	0.805	1	OVER	"P52784, F1PPB6, F1PBI6, F1PBK6, Q0QEN2"
GO:0007275	multicellular organismal development	P	4	65	7.40741	9.40666	0.808	1	UNDER	"E2R5H4, F1PBI6, J9NVT1, E2RI99"
GO:0048519	negative regulation of biological process	P	4	70	7.40741	10.1302	0.81	1	UNDER	"F1PBI6, J9NVE9, F1PGS2, E2RI99"
GO:0048583	regulation of response to stimulus	P	5	83	9.25926	12.0116	0.824	1	UNDER	"F1PN38, F1PBI6, J9NVE9, F1PGS2, C0LQL0"
GO:1901360	organic cyclic compound metabolic process	P	7	85	12.963	12.301	0.826	1	OVER	"P52784, F1PPB6, F1PBI6, J9NVE9, E2RI13, E2RI99, Q0QEN2"
GO:0071840	cellular component organization or biogenesis	P	6	96	11.1111	13.8929	0.834	1	UNDER	"J9NTJ3, F1P8G0, F1PBI6, F1PBL4, F1PGS2, F1Q432"
GO:0006807	nitrogen compound metabolic process	P	9	111	16.6667	16.0637	0.844	1	OVER	"P52784, F1PPB6, F1PBI6, F6X870, J9NVE9, E2RI13, F1PBK6, E2RI99, Q0QEN2"
GO:0016020	membrane	C	11	160	20.3704	23.1548	0.864	1	UNDER	"J9NTJ3, J9NU17, J9NZW6, F1P8A6, F1PE38, E2RP87, F1PBI6, F6X870, F1PGS2, F1P865, Q0QEN2"
GO:0003824	catalytic activity	F	15	213	27.7778	30.8249	0.876	1	UNDER	"J9PB81, F1PCG4, P52784, E2QSF4, F1PPB6, J9NU17, F1PN38, E2R5H4, J9P716, F6X870, Q9MZD3, E2RRU2, F1PBK6, E2QW34, Q0QEN2"
GO:0009987	cellular process	P	31	400	57.4074	57.8871	0.883	1	OVER	"F1PDY8, F1PCG4, P52784, E2QSF4, F1PPB6, J9NTJ3, F1PF31, F1PN38, F1PE38, E2RIG8, F1P8G0, E2R5H4, F1PBI6, J9P716, F6X870, J9NVE9, F1PBL4, J9NWQ5, E2RI13, Q9MZD3, F1PGS2, J9NVT1, F1Q432, E2RQF8, F1PBK6, F1P865, E2QW34, E2RI99, F1PGC3, C0LQL0, Q0QEN2"
GO:0005634	nucleus	C	4	61	7.40741	8.82779	1	1	UNDER	"J9P6T6, E2RH23, E2RI13, E2RI99"
GO:1901564	organonitrogen compound metabolic process	P	5	65	9.25926	9.40666	1	1	OVER	"P52784, F1PPB6, F1PBI6, F6X870, Q0QEN2"
GO:1901576	organic substance biosynthetic process	P	6	79	11.1111	11.4327	1	1	OVER	"P52784, F1PBI6, J9NVE9, E2RI13, E2RI99, Q0QEN2"
GO:0044425	membrane part	C	6	79	11.1111	11.4327	1	1	OVER	"J9NTJ3, J9NU17, J9NZW6, F1PBI6, F1PGS2, Q0QEN2"
GO:0005215	transporter activity	F	2	27	3.7037	3.90738	1	1	UNDER	"F1P865, Q0QEN2"
GO:0060255	regulation of macromolecule metabolic process	P	5	68	9.25926	9.84081	1	1	UNDER	"F1PBI6, J9NVE9, E2RI13, F1PGS2, E2RI99"
GO:0031323	regulation of cellular metabolic process	P	5	68	9.25926	9.84081	1	1	UNDER	"F1PBI6, J9NVE9, E2RI13, F1PGS2, E2RI99"
GO:0009058	biosynthetic process	P	6	84	11.1111	12.1563	1	1	UNDER	"P52784, F1PBI6, J9NVE9, E2RI13, E2RI99, Q0QEN2"
GO:0065008	regulation of biological quality	P	6	80	11.1111	11.5774	1	1	UNDER	"F1PCG4, F1P8G0, F1PBI6, F1PBL4, F1PGS2, F5XVB0"
GO:0044249	cellular biosynthetic process	P	5	66	9.25926	9.55137	1	1	OVER	"F1PBI6, J9NVE9, E2RI13, E2RI99, Q0QEN2"
GO:0080090	regulation of primary metabolic process	P	5	71	9.25926	10.275	1	1	UNDER	"F1PBI6, J9NVE9, E2RI13, F1PGS2, E2RI99"
GO:0044707	single-multicellular organism process	P	9	117	16.6667	16.932	1	1	OVER	"J9NU17, F1P8G0, E2R5H4, F1PBI6, F1PBL4, F1PGS2, F5XVB0, J9NVT1, E2RI99"
GO:0044723	single-organism carbohydrate metabolic process	P	2	26	3.7037	3.76266	1	1	OVER	"P52784, F1PBI6"
GO:0007166	cell surface receptor signaling pathway	P	2	26	3.7037	3.76266	1	1	OVER	"F1PBI6, F1PGS2"
GO:0012505	endomembrane system	C	2	29	3.7037	4.19682	1	1	UNDER	"F1PBI6, F1PGS2"
GO:0016491	oxidoreductase activity	F	2	29	3.7037	4.19682	1	1	UNDER	"F1PCG4, F6X870"
GO:0032879	regulation of localization	P	2	30	3.7037	4.34153	1	1	UNDER	"F1PBI6, F1PGS2"
GO:0048731	system development	P	4	56	7.40741	8.1042	1	1	UNDER	"E2R5H4, F1PBI6, J9NVT1, E2RI99"
GO:0016788	"hydrolase activity, acting on ester bonds"	F	1	24	1.85185	3.47323	1	1	UNDER	F1PBK6
GO:0006928	movement of cell or subcellular component	P	1	24	1.85185	3.47323	1	1	UNDER	F1PBI6
GO:0043231	intracellular membrane-bounded organelle	C	8	115	14.8148	16.6425	1	1	UNDER	"J9PB81, J9P6T6, E2RH23, F1PBI6, E2RI13, F1PGS2, E2RI99, Q0QEN2"
GO:0016740	transferase activity	F	3	39	5.55556	5.64399	1	1	OVER	"P52784, F1PN38, E2R5H4"
GO:0009056	catabolic process	P	4	60	7.40741	8.68307	1	1	UNDER	"P52784, F1PPB6, J9NVE9, E2QW34"
GO:0009059	macromolecule biosynthetic process	P	4	52	7.40741	7.52533	1	1	OVER	"F1PBI6, J9NVE9, E2RI13, E2RI99"
GO:0071944	cell periphery	C	4	52	7.40741	7.52533	1	1	OVER	"J9NTJ3, J9NU17, F1PBI6, F1PGS2"
GO:1901575	organic substance catabolic process	P	4	52	7.40741	7.52533	1	1	OVER	"P52784, F1PPB6, J9NVE9, E2QW34"
GO:0016043	cellular component organization	P	6	88	11.1111	12.7352	1	1	UNDER	"J9NTJ3, F1P8G0, F1PBI6, F1PBL4, F1PGS2, F1Q432"
GO:0050790	regulation of catalytic activity	P	1	22	1.85185	3.18379	1	1	UNDER	F1PBI6
GO:0006909	phagocytosis	P	1	22	1.85185	3.18379	1	1	UNDER	F1PBI6
GO:0055114	oxidation-reduction process	P	2	32	3.7037	4.63097	1	1	UNDER	"F1PCG4, F6X870"
GO:0044260	cellular macromolecule metabolic process	P	9	121	16.6667	17.5109	1	1	UNDER	"F1PN38, E2R5H4, F1PBI6, J9NVE9, E2RI13, Q9MZD3, F1PGS2, E2QW34, E2RI99"
GO:0016192	vesicle-mediated transport	P	2	37	3.7037	5.35456	1	1	UNDER	"F1PBI6, F1PGS2"
GO:0044710	single-organism metabolic process	P	10	136	18.5185	19.6816	1	1	UNDER	"F1PCG4, P52784, F1PPB6, F1PBI6, F6X870, J9NVE9, F1PGS2, F1Q432, F1PBK6, Q0QEN2"
GO:0090304	nucleic acid metabolic process	P	3	44	5.55556	6.36758	1	1	UNDER	"J9NVE9, E2RI13, E2RI99"
GO:0048523	negative regulation of cellular process	P	4	53	7.40741	7.67004	1	1	OVER	"F1PBI6, J9NVE9, F1PGS2, E2RI99"
GO:0032501	multicellular organismal process	P	9	126	16.6667	18.2344	1	1	UNDER	"J9NU17, F1P8G0, E2R5H4, F1PBI6, F1PBL4, F1PGS2, F5XVB0, J9NVT1, E2RI99"
GO:0044711	single-organism biosynthetic process	P	2	34	3.7037	4.92041	1	1	UNDER	"P52784, Q0QEN2"
GO:0005975	carbohydrate metabolic process	P	2	34	3.7037	4.92041	1	1	UNDER	"P52784, F1PBI6"
GO:0040011	locomotion	P	1	23	1.85185	3.32851	1	1	UNDER	F1PBI6
GO:0006091	generation of precursor metabolites and energy	P	1	23	1.85185	3.32851	1	1	UNDER	P52784
GO:0016070	RNA metabolic process	P	3	40	5.55556	5.78871	1	1	UNDER	"J9NVE9, E2RI13, E2RI99"
GO:0009057	macromolecule catabolic process	P	1	21	1.85185	3.03907	1	1	UNDER	E2QW34
GO:0044283	small molecule biosynthetic process	P	1	21	1.85185	3.03907	1	1	UNDER	P52784
GO:0043009	chordate embryonic development	P	0	1	0	0.144718	1	1	OVER
GO:0015204	urea transmembrane transporter activity	F	0	1	0	0.144718	1	1	OVER
GO:0004364	glutathione transferase activity	F	0	1	0	0.144718	1	1	OVER
GO:2000114	regulation of establishment of cell polarity	P	0	1	0	0.144718	1	1	OVER
GO:0007623	circadian rhythm	P	0	1	0	0.144718	1	1	OVER
GO:0006536	glutamate metabolic process	P	0	1	0	0.144718	1	1	OVER
GO:0046982	protein heterodimerization activity	F	0	1	0	0.144718	1	1	OVER
GO:0045897	positive regulation of transcription during mitosis	P	0	1	0	0.144718	1	1	OVER
GO:0045896	regulation of transcription during mitosis	P	0	1	0	0.144718	1	1	OVER
GO:0051291	protein heterooligomerization	P	0	1	0	0.144718	1	1	OVER
GO:0032155	cell division site part	C	0	1	0	0.144718	1	1	OVER
GO:0032154	cleavage furrow	C	0	1	0	0.144718	1	1	OVER
GO:0032153	cell division site	C	0	1	0	0.144718	1	1	OVER
GO:0006526	arginine biosynthetic process	P	0	1	0	0.144718	1	1	OVER
GO:0006522	alanine metabolic process	P	0	1	0	0.144718	1	1	OVER
GO:0006521	regulation of cellular amino acid metabolic process	P	0	1	0	0.144718	1	1	OVER
GO:0051289	protein homotetramerization	P	0	1	0	0.144718	1	1	OVER
GO:0051287	NAD binding	F	0	1	0	0.144718	1	1	OVER
GO:0033238	regulation of cellular amine metabolic process	P	0	1	0	0.144718	1	1	OVER
GO:0004347	glucose-6-phosphate isomerase activity	F	0	1	0	0.144718	1	1	OVER
GO:0080171	lytic vacuole organization	P	0	1	0	0.144718	1	1	OVER
GO:0044794	positive regulation by host of viral process	P	0	1	0	0.144718	1	1	OVER
GO:0003254	regulation of membrane depolarization	P	0	1	0	0.144718	1	1	OVER
GO:0002161	aminoacyl-tRNA editing activity	F	0	1	0	0.144718	1	1	OVER
GO:0001076	"transcription factor activity, RNA polymerase II transcription factor binding"	F	0	1	0	0.144718	1	1	OVER
GO:0046961	"proton-transporting ATPase activity, rotational mechanism"	F	0	1	0	0.144718	1	1	OVER
GO:0061028	establishment of endothelial barrier	P	0	1	0	0.144718	1	1	OVER
GO:0044788	modulation by host of viral process	P	0	1	0	0.144718	1	1	OVER
GO:0004332	fructose-bisphosphate aldolase activity	F	0	1	0	0.144718	1	1	OVER
GO:0015893	drug transport	P	0	1	0	0.144718	1	1	OVER
GO:0072584	caveolin-mediated endocytosis	P	0	1	0	0.144718	1	1	OVER
GO:0071496	cellular response to external stimulus	P	0	1	0	0.144718	1	1	OVER
GO:0006509	membrane protein ectodomain proteolysis	P	0	1	0	0.144718	1	1	OVER
GO:0071493	cellular response to UV-B	P	0	1	0	0.144718	1	1	OVER
GO:0006507	GPI anchor release	P	0	1	0	0.144718	1	1	OVER
GO:0006505	GPI anchor metabolic process	P	0	1	0	0.144718	1	1	OVER
GO:0051262	protein tetramerization	P	0	1	0	0.144718	1	1	OVER
GO:0015889	cobalamin transport	P	0	1	0	0.144718	1	1	OVER
GO:0016972	thiol oxidase activity	F	0	1	0	0.144718	1	1	OVER
GO:0004322	ferroxidase activity	F	0	1	0	0.144718	1	1	OVER
GO:0015886	heme transport	P	0	1	0	0.144718	1	1	OVER
GO:0002149	hypochlorous acid biosynthetic process	P	0	1	0	0.144718	1	1	OVER
GO:0002148	hypochlorous acid metabolic process	P	0	1	0	0.144718	1	1	OVER
GO:0042594	response to starvation	P	0	1	0	0.144718	1	1	OVER
GO:0071482	cellular response to light stimulus	P	0	1	0	0.144718	1	1	OVER
GO:0046949	fatty-acyl-CoA biosynthetic process	P	0	1	0	0.144718	1	1	OVER
GO:0042590	antigen processing and presentation of exogenous peptide antigen via MHC class I	P	0	1	0	0.144718	1	1	OVER
GO:0033209	tumor necrosis factor-mediated signaling pathway	P	0	1	0	0.144718	1	1	OVER
GO:0051251	positive regulation of lymphocyte activation	P	0	1	0	0.144718	1	1	OVER
GO:0061001	regulation of dendritic spine morphogenesis	P	0	1	0	0.144718	1	1	OVER
GO:0071478	cellular response to radiation	P	0	1	0	0.144718	1	1	OVER
GO:0001047	core promoter binding	F	0	1	0	0.144718	1	1	OVER
GO:0001046	core promoter sequence-specific DNA binding	F	0	1	0	0.144718	1	1	OVER
GO:0042574	retinal metabolic process	P	0	1	0	0.144718	1	1	OVER
GO:0045833	negative regulation of lipid metabolic process	P	0	1	0	0.144718	1	1	OVER
GO:0090599	alpha-glucosidase activity	F	0	1	0	0.144718	1	1	OVER
GO:0044744	protein targeting to nucleus	P	0	1	0	0.144718	1	1	OVER
GO:0003206	cardiac chamber morphogenesis	P	0	1	0	0.144718	1	1	OVER
GO:0003205	cardiac chamber development	P	0	1	0	0.144718	1	1	OVER
GO:0072542	protein phosphatase activator activity	F	0	1	0	0.144718	1	1	OVER
GO:0042567	insulin-like growth factor ternary complex	C	0	1	0	0.144718	1	1	OVER
GO:0042562	hormone binding	F	0	1	0	0.144718	1	1	OVER
GO:0046915	transition metal ion transmembrane transporter activity	F	0	1	0	0.144718	1	1	OVER
GO:0034987	immunoglobulin receptor binding	F	0	1	0	0.144718	1	1	OVER
GO:0051225	spindle assembly	P	0	1	0	0.144718	1	1	OVER
GO:0015840	urea transport	P	0	1	0	0.144718	1	1	OVER
GO:1903358	regulation of Golgi organization	P	0	1	0	0.144718	1	1	OVER
GO:0002102	podosome	C	0	1	0	0.144718	1	1	OVER
GO:0038096	Fc-gamma receptor signaling pathway involved in phagocytosis	P	0	1	0	0.144718	1	1	OVER
GO:0034979	NAD-dependent protein deacetylase activity	F	0	1	0	0.144718	1	1	OVER
GO:0038094	Fc-gamma receptor signaling pathway	P	0	1	0	0.144718	1	1	OVER
GO:0051213	dioxygenase activity	F	0	1	0	0.144718	1	1	OVER
GO:0004998	transferrin receptor activity	F	0	1	0	0.144718	1	1	OVER
GO:0090576	RNA polymerase III transcription factor complex	C	0	1	0	0.144718	1	1	OVER
GO:0072527	pyrimidine-containing compound metabolic process	P	0	1	0	0.144718	1	1	OVER
GO:0061684	chaperone-mediated autophagy	P	0	1	0	0.144718	1	1	OVER
GO:0045807	positive regulation of endocytosis	P	0	1	0	0.144718	1	1	OVER
GO:0003899	DNA-directed RNA polymerase activity	F	0	1	0	0.144718	1	1	OVER
GO:0072510	trivalent inorganic cation transmembrane transporter activity	F	0	1	0	0.144718	1	1	OVER
GO:0042537	benzene-containing compound metabolic process	P	0	1	0	0.144718	1	1	OVER
GO:1990000	amyloid fibril formation	P	0	1	0	0.144718	1	1	OVER
GO:0008094	DNA-dependent ATPase activity	F	0	1	0	0.144718	1	1	OVER
GO:0071417	cellular response to organonitrogen compound	P	0	1	0	0.144718	1	1	OVER
GO:0070328	triglyceride homeostasis	P	0	1	0	0.144718	1	1	OVER
GO:0070327	thyroid hormone transport	P	0	1	0	0.144718	1	1	OVER
GO:1903322	positive regulation of protein modification by small protein conjugation or removal	P	0	1	0	0.144718	1	1	OVER
GO:1903321	negative regulation of protein modification by small protein conjugation or removal	P	0	1	0	0.144718	1	1	OVER
GO:0070324	thyroid hormone binding	F	0	1	0	0.144718	1	1	OVER
GO:1903320	regulation of protein modification by small protein conjugation or removal	P	0	1	0	0.144718	1	1	OVER
GO:0030593	neutrophil chemotaxis	P	0	1	0	0.144718	1	1	OVER
GO:0038061	NIK/NF-kappaB signaling	P	0	1	0	0.144718	1	1	OVER
GO:0008088	axon cargo transport	P	0	1	0	0.144718	1	1	OVER
GO:0051899	membrane depolarization	P	0	1	0	0.144718	1	1	OVER
GO:0090533	cation-transporting ATPase complex	C	0	1	0	0.144718	1	1	OVER
GO:0014706	striated muscle tissue development	P	0	1	0	0.144718	1	1	OVER
GO:0031669	cellular response to nutrient levels	P	0	1	0	0.144718	1	1	OVER
GO:0031668	cellular response to extracellular stimulus	P	0	1	0	0.144718	1	1	OVER
GO:0031667	response to nutrient levels	P	0	1	0	0.144718	1	1	OVER
GO:0070304	positive regulation of stress-activated protein kinase signaling cascade	P	0	1	0	0.144718	1	1	OVER
GO:1900034	regulation of cellular response to heat	P	0	1	0	0.144718	1	1	OVER
GO:0090527	actin filament reorganization	P	0	1	0	0.144718	1	1	OVER
GO:0050798	activated T cell proliferation	P	0	1	0	0.144718	1	1	OVER
GO:0003857	3-hydroxyacyl-CoA dehydrogenase activity	F	0	1	0	0.144718	1	1	OVER
GO:0060541	respiratory system development	P	0	1	0	0.144718	1	1	OVER
GO:0012510	trans-Golgi network transport vesicle membrane	C	0	1	0	0.144718	1	1	OVER
GO:1900026	positive regulation of substrate adhesion-dependent cell spreading	P	0	1	0	0.144718	1	1	OVER
GO:1900024	regulation of substrate adhesion-dependent cell spreading	P	0	1	0	0.144718	1	1	OVER
GO:0003847	1-alkyl-2-acetylglycerophosphocholine esterase activity	F	0	1	0	0.144718	1	1	OVER
GO:0060537	muscle tissue development	P	0	1	0	0.144718	1	1	OVER
GO:0031648	protein destabilization	P	0	1	0	0.144718	1	1	OVER
GO:0002755	MyD88-dependent toll-like receptor signaling pathway	P	0	1	0	0.144718	1	1	OVER
GO:0001666	response to hypoxia	P	0	1	0	0.144718	1	1	OVER
GO:0048496	maintenance of organ identity	P	0	1	0	0.144718	1	1	OVER
GO:0050777	negative regulation of immune response	P	0	1	0	0.144718	1	1	OVER
GO:0090505	epiboly involved in wound healing	P	0	1	0	0.144718	1	1	OVER
GO:0090504	epiboly	P	0	1	0	0.144718	1	1	OVER
GO:0090502	"RNA phosphodiester bond hydrolysis, endonucleolytic"	P	0	1	0	0.144718	1	1	OVER
GO:0050773	regulation of dendrite development	P	0	1	0	0.144718	1	1	OVER
GO:0090501	RNA phosphodiester bond hydrolysis	P	0	1	0	0.144718	1	1	OVER
GO:0008038	neuron recognition	P	0	1	0	0.144718	1	1	OVER
GO:0008037	cell recognition	P	0	1	0	0.144718	1	1	OVER
GO:0048489	synaptic vesicle transport	P	0	1	0	0.144718	1	1	OVER
GO:0051851	modification by host of symbiont morphology or physiology	P	0	1	0	0.144718	1	1	OVER
GO:0050766	positive regulation of phagocytosis	P	0	1	0	0.144718	1	1	OVER
GO:0050764	regulation of phagocytosis	P	0	1	0	0.144718	1	1	OVER
GO:0098687	chromosomal region	C	0	1	0	0.144718	1	1	OVER
GO:0003823	antigen binding	F	0	1	0	0.144718	1	1	OVER
GO:0070988	demethylation	P	0	1	0	0.144718	1	1	OVER
GO:0004908	interleukin-1 receptor activity	F	0	1	0	0.144718	1	1	OVER
GO:0048475	coated membrane	C	0	1	0	0.144718	1	1	OVER
GO:0048471	perinuclear region of cytoplasm	C	0	1	0	0.144718	1	1	OVER
GO:0003810	protein-glutamine gamma-glutamyltransferase activity	F	0	1	0	0.144718	1	1	OVER
GO:0030522	intracellular receptor signaling pathway	P	0	1	0	0.144718	1	1	OVER
GO:0030521	androgen receptor signaling pathway	P	0	1	0	0.144718	1	1	OVER
GO:0050748	negative regulation of lipoprotein metabolic process	P	0	1	0	0.144718	1	1	OVER
GO:0050746	regulation of lipoprotein metabolic process	P	0	1	0	0.144718	1	1	OVER
GO:0030518	intracellular steroid hormone receptor signaling pathway	P	0	1	0	0.144718	1	1	OVER
GO:0002713	negative regulation of B cell mediated immunity	P	0	1	0	0.144718	1	1	OVER
GO:0002712	regulation of B cell mediated immunity	P	0	1	0	0.144718	1	1	OVER
GO:0051828	entry into other organism involved in symbiotic interaction	P	0	1	0	0.144718	1	1	OVER
GO:0086009	membrane repolarization	P	0	1	0	0.144718	1	1	OVER
GO:0002707	negative regulation of lymphocyte mediated immunity	P	0	1	0	0.144718	1	1	OVER
GO:0002706	regulation of lymphocyte mediated immunity	P	0	1	0	0.144718	1	1	OVER
GO:0030509	BMP signaling pathway	P	0	1	0	0.144718	1	1	OVER
GO:0002704	negative regulation of leukocyte mediated immunity	P	0	1	0	0.144718	1	1	OVER
GO:0002703	regulation of leukocyte mediated immunity	P	0	1	0	0.144718	1	1	OVER
GO:1903955	positive regulation of protein targeting to mitochondrion	P	0	1	0	0.144718	1	1	OVER
GO:0030500	regulation of bone mineralization	P	0	1	0	0.144718	1	1	OVER
GO:0051817	modification of morphology or physiology of other organism involved in symbiotic interaction	P	0	1	0	0.144718	1	1	OVER
GO:0044091	membrane biogenesis	P	0	1	0	0.144718	1	1	OVER
GO:0050729	positive regulation of inflammatory response	P	0	1	0	0.144718	1	1	OVER
GO:0050728	negative regulation of inflammatory response	P	0	1	0	0.144718	1	1	OVER
GO:0016289	CoA hydrolase activity	F	0	1	0	0.144718	1	1	OVER
GO:1902857	positive regulation of nonmotile primary cilium assembly	P	0	1	0	0.144718	1	1	OVER
GO:1902855	regulation of nonmotile primary cilium assembly	P	0	1	0	0.144718	1	1	OVER
GO:1902850	microtubule cytoskeleton organization involved in mitosis	P	0	1	0	0.144718	1	1	OVER
GO:0051806	entry into cell of other organism involved in symbiotic interaction	P	0	1	0	0.144718	1	1	OVER
GO:0009792	embryo development ending in birth or egg hatching	P	0	1	0	0.144718	1	1	OVER
GO:0010985	negative regulation of lipoprotein particle clearance	P	0	1	0	0.144718	1	1	OVER
GO:0010984	regulation of lipoprotein particle clearance	P	0	1	0	0.144718	1	1	OVER
GO:0070938	contractile ring	C	0	1	0	0.144718	1	1	OVER
GO:0016279	protein-lysine N-methyltransferase activity	F	0	1	0	0.144718	1	1	OVER
GO:0016278	lysine N-methyltransferase activity	F	0	1	0	0.144718	1	1	OVER
GO:0070936	protein K48-linked ubiquitination	P	0	1	0	0.144718	1	1	OVER
GO:0070932	histone H3 deacetylation	P	0	1	0	0.144718	1	1	OVER
GO:0050707	regulation of cytokine secretion	P	0	1	0	0.144718	1	1	OVER
GO:0010970	microtubule-based transport	P	0	1	0	0.144718	1	1	OVER
GO:0045159	myosin II binding	F	0	1	0	0.144718	1	1	OVER
GO:0097530	granulocyte migration	P	0	1	0	0.144718	1	1	OVER
GO:0016264	gap junction assembly	P	0	1	0	0.144718	1	1	OVER
GO:0007597	"blood coagulation, intrinsic pathway"	P	0	1	0	0.144718	1	1	OVER
GO:1903919	negative regulation of actin filament severing	P	0	1	0	0.144718	1	1	OVER
GO:1903918	regulation of actin filament severing	P	0	1	0	0.144718	1	1	OVER
GO:0048407	platelet-derived growth factor binding	F	0	1	0	0.144718	1	1	OVER
GO:0010959	regulation of metal ion transport	P	0	1	0	0.144718	1	1	OVER
GO:0036477	somatodendritic compartment	C	0	1	0	0.144718	1	1	OVER
GO:0010952	positive regulation of peptidase activity	P	0	1	0	0.144718	1	1	OVER
GO:0010950	positive regulation of endopeptidase activity	P	0	1	0	0.144718	1	1	OVER
GO:1903909	regulation of receptor clustering	P	0	1	0	0.144718	1	1	OVER
GO:0006497	protein lipidation	P	0	1	0	0.144718	1	1	OVER
GO:1903906	regulation of plasma membrane raft polarization	P	0	1	0	0.144718	1	1	OVER
GO:0097513	myosin II filament	C	0	1	0	0.144718	1	1	OVER
GO:1903903	regulation of establishment of T cell polarity	P	0	1	0	0.144718	1	1	OVER
GO:0016248	channel inhibitor activity	F	0	1	0	0.144718	1	1	OVER
GO:0016247	channel regulator activity	F	0	1	0	0.144718	1	1	OVER
GO:1903901	negative regulation of viral life cycle	P	0	1	0	0.144718	1	1	OVER
GO:0014066	regulation of phosphatidylinositol 3-kinase signaling	P	0	1	0	0.144718	1	1	OVER
GO:0010948	negative regulation of cell cycle process	P	0	1	0	0.144718	1	1	OVER
GO:2000060	positive regulation of protein ubiquitination involved in ubiquitin-dependent protein catabolic process	P	0	1	0	0.144718	1	1	OVER
GO:0035371	microtubule plus-end	C	0	1	0	0.144718	1	1	OVER
GO:0006482	protein demethylation	P	0	1	0	0.144718	1	1	OVER
GO:1902807	negative regulation of cell cycle G1/S phase transition	P	0	1	0	0.144718	1	1	OVER
GO:0016236	macroautophagy	P	0	1	0	0.144718	1	1	OVER
GO:1902806	regulation of cell cycle G1/S phase transition	P	0	1	0	0.144718	1	1	OVER
GO:0016233	telomere capping	P	0	1	0	0.144718	1	1	OVER
GO:0045121	membrane raft	C	0	1	0	0.144718	1	1	OVER
GO:0005391	sodium:potassium-exchanging ATPase activity	F	0	1	0	0.144718	1	1	OVER
GO:0033194	response to hydroperoxide	P	0	1	0	0.144718	1	1	OVER
GO:2000058	regulation of protein ubiquitination involved in ubiquitin-dependent protein catabolic process	P	0	1	0	0.144718	1	1	OVER
GO:0007568	aging	P	0	1	0	0.144718	1	1	OVER
GO:0006479	protein methylation	P	0	1	0	0.144718	1	1	OVER
GO:0006476	protein deacetylation	P	0	1	0	0.144718	1	1	OVER
GO:0006475	internal protein amino acid acetylation	P	0	1	0	0.144718	1	1	OVER
GO:0006473	protein acetylation	P	0	1	0	0.144718	1	1	OVER
GO:0005388	calcium-transporting ATPase activity	F	0	1	0	0.144718	1	1	OVER
GO:0016226	iron-sulfur cluster assembly	P	0	1	0	0.144718	1	1	OVER
GO:0005381	iron ion transmembrane transporter activity	F	0	1	0	0.144718	1	1	OVER
GO:0033180	"proton-transporting V-type ATPase, V1 domain"	C	0	1	0	0.144718	1	1	OVER
GO:2000045	regulation of G1/S transition of mitotic cell cycle	P	0	1	0	0.144718	1	1	OVER
GO:0032091	negative regulation of protein binding	P	0	1	0	0.144718	1	1	OVER
GO:0010922	positive regulation of phosphatase activity	P	0	1	0	0.144718	1	1	OVER
GO:0010921	regulation of phosphatase activity	P	0	1	0	0.144718	1	1	OVER
GO:0036442	hydrogen-exporting ATPase activity	F	0	1	0	0.144718	1	1	OVER
GO:0033176	proton-transporting V-type ATPase complex	C	0	1	0	0.144718	1	1	OVER
GO:0014033	neural crest cell differentiation	P	0	1	0	0.144718	1	1	OVER
GO:0014032	neural crest cell development	P	0	1	0	0.144718	1	1	OVER
GO:0014031	mesenchymal cell development	P	0	1	0	0.144718	1	1	OVER
GO:0006450	regulation of translational fidelity	P	0	1	0	0.144718	1	1	OVER
GO:2000027	regulation of organ morphogenesis	P	0	1	0	0.144718	1	1	OVER
GO:2000021	regulation of ion homeostasis	P	0	1	0	0.144718	1	1	OVER
GO:0035338	long-chain fatty-acyl-CoA biosynthetic process	P	0	1	0	0.144718	1	1	OVER
GO:0035337	fatty-acyl-CoA metabolic process	P	0	1	0	0.144718	1	1	OVER
GO:0006448	regulation of translational elongation	P	0	1	0	0.144718	1	1	OVER
GO:0035336	long-chain fatty-acyl-CoA metabolic process	P	0	1	0	0.144718	1	1	OVER
GO:0033157	regulation of intracellular protein transport	P	0	1	0	0.144718	1	1	OVER
GO:0015108	chloride transmembrane transporter activity	F	0	1	0	0.144718	1	1	OVER
GO:0015103	inorganic anion transmembrane transporter activity	F	0	1	0	0.144718	1	1	OVER
GO:2000009	negative regulation of protein localization to cell surface	P	0	1	0	0.144718	1	1	OVER
GO:2000008	regulation of protein localization to cell surface	P	0	1	0	0.144718	1	1	OVER
GO:0035313	"wound healing, spreading of epidermal cells"	P	0	1	0	0.144718	1	1	OVER
GO:0051184	cofactor transporter activity	F	0	1	0	0.144718	1	1	OVER
GO:0051183	vitamin transporter activity	F	0	1	0	0.144718	1	1	OVER
GO:0051181	cofactor transport	P	0	1	0	0.144718	1	1	OVER
GO:0003158	endothelium development	P	0	1	0	0.144718	1	1	OVER
GO:0002064	epithelial cell development	P	0	1	0	0.144718	1	1	OVER
GO:0035307	positive regulation of protein dephosphorylation	P	0	1	0	0.144718	1	1	OVER
GO:0035306	positive regulation of dephosphorylation	P	0	1	0	0.144718	1	1	OVER
GO:0035304	regulation of protein dephosphorylation	P	0	1	0	0.144718	1	1	OVER
GO:0035303	regulation of dephosphorylation	P	0	1	0	0.144718	1	1	OVER
GO:0006414	translational elongation	P	0	1	0	0.144718	1	1	OVER
GO:0032039	integrator complex	C	0	1	0	0.144718	1	1	OVER
GO:0051170	nuclear import	P	0	1	0	0.144718	1	1	OVER
GO:0071392	cellular response to estradiol stimulus	P	0	1	0	0.144718	1	1	OVER
GO:0051169	nuclear transport	P	0	1	0	0.144718	1	1	OVER
GO:0006401	RNA catabolic process	P	0	1	0	0.144718	1	1	OVER
GO:0016874	ligase activity	F	0	1	0	0.144718	1	1	OVER
GO:1903293	phosphatase complex	C	0	1	0	0.144718	1	1	OVER
GO:0046849	bone remodeling	P	0	1	0	0.144718	1	1	OVER
GO:0070293	renal absorption	P	0	1	0	0.144718	1	1	OVER
GO:0032012	regulation of ARF protein signal transduction	P	0	1	0	0.144718	1	1	OVER
GO:0032011	ARF protein signal transduction	P	0	1	0	0.144718	1	1	OVER
GO:0071378	cellular response to growth hormone stimulus	P	0	1	0	0.144718	1	1	OVER
GO:0071375	cellular response to peptide hormone stimulus	P	0	1	0	0.144718	1	1	OVER
GO:0051149	positive regulation of muscle cell differentiation	P	0	1	0	0.144718	1	1	OVER
GO:0051147	regulation of muscle cell differentiation	P	0	1	0	0.144718	1	1	OVER
GO:0051146	striated muscle cell differentiation	P	0	1	0	0.144718	1	1	OVER
GO:0016855	"racemase and epimerase activity, acting on amino acids and derivatives"	F	0	1	0	0.144718	1	1	OVER
GO:0016854	racemase and epimerase activity	F	0	1	0	0.144718	1	1	OVER
GO:0045740	positive regulation of DNA replication	P	0	1	0	0.144718	1	1	OVER
GO:0002028	regulation of sodium ion transport	P	0	1	0	0.144718	1	1	OVER
GO:0002020	protease binding	F	0	1	0	0.144718	1	1	OVER
GO:0035987	endodermal cell differentiation	P	0	1	0	0.144718	1	1	OVER
GO:0016842	amidine-lyase activity	F	0	1	0	0.144718	1	1	OVER
GO:0016840	carbon-nitrogen lyase activity	F	0	1	0	0.144718	1	1	OVER
GO:1904358	positive regulation of telomere maintenance via telomere lengthening	P	0	1	0	0.144718	1	1	OVER
GO:1904356	regulation of telomere maintenance via telomere lengthening	P	0	1	0	0.144718	1	1	OVER
GO:1904355	positive regulation of telomere capping	P	0	1	0	0.144718	1	1	OVER
GO:1904353	regulation of telomere capping	P	0	1	0	0.144718	1	1	OVER
GO:0071356	cellular response to tumor necrosis factor	P	0	1	0	0.144718	1	1	OVER
GO:0002011	morphogenesis of an epithelial sheet	P	0	1	0	0.144718	1	1	OVER
GO:1902174	positive regulation of keratinocyte apoptotic process	P	0	1	0	0.144718	1	1	OVER
GO:1902172	regulation of keratinocyte apoptotic process	P	0	1	0	0.144718	1	1	OVER
GO:0051127	positive regulation of actin nucleation	P	0	1	0	0.144718	1	1	OVER
GO:0051125	regulation of actin nucleation	P	0	1	0	0.144718	1	1	OVER
GO:0045724	positive regulation of cilium assembly	P	0	1	0	0.144718	1	1	OVER
GO:0090484	drug transporter activity	F	0	1	0	0.144718	1	1	OVER
GO:2000650	negative regulation of sodium ion transmembrane transporter activity	P	0	1	0	0.144718	1	1	OVER
GO:0042450	arginine biosynthetic process via ornithine	P	0	1	0	0.144718	1	1	OVER
GO:0005989	lactose biosynthetic process	P	0	1	0	0.144718	1	1	OVER
GO:0005988	lactose metabolic process	P	0	1	0	0.144718	1	1	OVER
GO:0005985	sucrose metabolic process	P	0	1	0	0.144718	1	1	OVER
GO:0005982	starch metabolic process	P	0	1	0	0.144718	1	1	OVER
GO:0004896	cytokine receptor activity	F	0	1	0	0.144718	1	1	OVER
GO:2000649	regulation of sodium ion transmembrane transporter activity	P	0	1	0	0.144718	1	1	OVER
GO:0009099	valine biosynthetic process	P	0	1	0	0.144718	1	1	OVER
GO:0009098	leucine biosynthetic process	P	0	1	0	0.144718	1	1	OVER
GO:0009097	isoleucine biosynthetic process	P	0	1	0	0.144718	1	1	OVER
GO:0005978	glycogen biosynthetic process	P	0	1	0	0.144718	1	1	OVER
GO:0051100	negative regulation of binding	P	0	1	0	0.144718	1	1	OVER
GO:0004882	androgen receptor activity	F	0	1	0	0.144718	1	1	OVER
GO:0003796	lysozyme activity	F	0	1	0	0.144718	1	1	OVER
GO:0060485	mesenchyme development	P	0	1	0	0.144718	1	1	OVER
GO:0009084	glutamine family amino acid biosynthetic process	P	0	1	0	0.144718	1	1	OVER
GO:0009083	branched-chain amino acid catabolic process	P	0	1	0	0.144718	1	1	OVER
GO:0016805	dipeptidase activity	F	0	1	0	0.144718	1	1	OVER
GO:0009082	branched-chain amino acid biosynthetic process	P	0	1	0	0.144718	1	1	OVER
GO:0004879	"RNA polymerase II transcription factor activity, ligand-activated sequence-specific DNA binding"	F	0	1	0	0.144718	1	1	OVER
GO:0016803	ether hydrolase activity	F	0	1	0	0.144718	1	1	OVER
GO:0016801	"hydrolase activity, acting on ether bonds"	F	0	1	0	0.144718	1	1	OVER
GO:0002698	negative regulation of immune effector process	P	0	1	0	0.144718	1	1	OVER
GO:0002697	regulation of immune effector process	P	0	1	0	0.144718	1	1	OVER
GO:0031580	membrane raft distribution	P	0	1	0	0.144718	1	1	OVER
GO:0009078	pyruvate family amino acid metabolic process	P	0	1	0	0.144718	1	1	OVER
GO:0030492	hemoglobin binding	F	0	1	0	0.144718	1	1	OVER
GO:0030490	maturation of SSU-rRNA	P	0	1	0	0.144718	1	1	OVER
GO:0031579	membrane raft organization	P	0	1	0	0.144718	1	1	OVER
GO:0043500	muscle adaptation	P	0	1	0	0.144718	1	1	OVER
GO:1903214	regulation of protein targeting to mitochondrion	P	0	1	0	0.144718	1	1	OVER
GO:0071300	cellular response to retinoic acid	P	0	1	0	0.144718	1	1	OVER
GO:0004859	phospholipase inhibitor activity	F	0	1	0	0.144718	1	1	OVER
GO:0070208	protein heterotrimerization	P	0	1	0	0.144718	1	1	OVER
GO:0070206	protein trimerization	P	0	1	0	0.144718	1	1	OVER
GO:0030478	actin cap	C	0	1	0	0.144718	1	1	OVER
GO:0002673	regulation of acute inflammatory response	P	0	1	0	0.144718	1	1	OVER
GO:1902117	positive regulation of organelle assembly	P	0	1	0	0.144718	1	1	OVER
GO:0009052	"pentose-phosphate shunt, non-oxidative branch"	P	0	1	0	0.144718	1	1	OVER
GO:0022898	regulation of transmembrane transporter activity	P	0	1	0	0.144718	1	1	OVER
GO:0051783	regulation of nuclear division	P	0	1	0	0.144718	1	1	OVER
GO:1901017	negative regulation of potassium ion transmembrane transporter activity	P	0	1	0	0.144718	1	1	OVER
GO:1901016	regulation of potassium ion transmembrane transporter activity	P	0	1	0	0.144718	1	1	OVER
GO:0005923	bicellular tight junction	C	0	1	0	0.144718	1	1	OVER
GO:0005922	connexon complex	C	0	1	0	0.144718	1	1	OVER
GO:0005921	gap junction	C	0	1	0	0.144718	1	1	OVER
GO:0031545	peptidyl-proline 4-dioxygenase activity	F	0	1	0	0.144718	1	1	OVER
GO:0031543	peptidyl-proline dioxygenase activity	F	0	1	0	0.144718	1	1	OVER
GO:0000479	"endonucleolytic cleavage of tricistronic rRNA transcript (SSU-rRNA, 5.8S rRNA, LSU-rRNA)"	P	0	1	0	0.144718	1	1	OVER
GO:0030450	"regulation of complement activation, classical pathway"	P	0	1	0	0.144718	1	1	OVER
GO:0000478	endonucleolytic cleavage involved in rRNA processing	P	0	1	0	0.144718	1	1	OVER
GO:0005913	cell-cell adherens junction	C	0	1	0	0.144718	1	1	OVER
GO:0010224	response to UV-B	P	0	1	0	0.144718	1	1	OVER
GO:0050671	positive regulation of lymphocyte proliferation	P	0	1	0	0.144718	1	1	OVER
GO:0003730	mRNA 3'-UTR binding	F	0	1	0	0.144718	1	1	OVER
GO:0030449	regulation of complement activation	P	0	1	0	0.144718	1	1	OVER
GO:0000469	cleavage involved in rRNA processing	P	0	1	0	0.144718	1	1	OVER
GO:0005905	coated pit	C	0	1	0	0.144718	1	1	OVER
GO:0000462	"maturation of SSU-rRNA from tricistronic rRNA transcript (SSU-rRNA, 5.8S rRNA, LSU-rRNA)"	P	0	1	0	0.144718	1	1	OVER
GO:0005901	caveola	C	0	1	0	0.144718	1	1	OVER
GO:0000460	maturation of 5.8S rRNA	P	0	1	0	0.144718	1	1	OVER
GO:0003729	mRNA binding	F	0	1	0	0.144718	1	1	OVER
GO:0050663	cytokine secretion	P	0	1	0	0.144718	1	1	OVER
GO:0061502	early endosome to recycling endosome transport	P	0	1	0	0.144718	1	1	OVER
GO:0031529	ruffle organization	P	0	1	0	0.144718	1	1	OVER
GO:0021772	olfactory bulb development	P	0	1	0	0.144718	1	1	OVER
GO:0060416	response to growth hormone	P	0	1	0	0.144718	1	1	OVER
GO:0003724	RNA helicase activity	F	0	1	0	0.144718	1	1	OVER
GO:0004807	triose-phosphate isomerase activity	F	0	1	0	0.144718	1	1	OVER
GO:0004806	triglyceride lipase activity	F	0	1	0	0.144718	1	1	OVER
GO:0004802	transketolase activity	F	0	1	0	0.144718	1	1	OVER
GO:0004801	sedoheptulose-7-phosphate:D-glyceraldehyde-3-phosphate glyceronetransferase activity	F	0	1	0	0.144718	1	1	OVER
GO:0003714	transcription corepressor activity	F	0	1	0	0.144718	1	1	OVER
GO:0003713	transcription coactivator activity	F	0	1	0	0.144718	1	1	OVER
GO:0018394	peptidyl-lysine acetylation	P	0	1	0	0.144718	1	1	OVER
GO:0018393	internal peptidyl-lysine acetylation	P	0	1	0	0.144718	1	1	OVER
GO:0031514	motile cilium	C	0	1	0	0.144718	1	1	OVER
GO:0097484	dendrite extension	P	0	1	0	0.144718	1	1	OVER
GO:0097480	establishment of synaptic vesicle localization	P	0	1	0	0.144718	1	1	OVER
GO:1901699	cellular response to nitrogen compound	P	0	1	0	0.144718	1	1	OVER
GO:0001530	lipopolysaccharide binding	F	0	1	0	0.144718	1	1	OVER
GO:0022843	voltage-gated cation channel activity	F	0	1	0	0.144718	1	1	OVER
GO:0003707	steroid hormone receptor activity	F	0	1	0	0.144718	1	1	OVER
GO:0097479	synaptic vesicle localization	P	0	1	0	0.144718	1	1	OVER
GO:0098562	cytoplasmic side of membrane	C	0	1	0	0.144718	1	1	OVER
GO:0046184	aldehyde biosynthetic process	P	0	1	0	0.144718	1	1	OVER
GO:0071953	elastic fiber	C	0	1	0	0.144718	1	1	OVER
GO:0001527	microfibril	C	0	1	0	0.144718	1	1	OVER
GO:1903861	positive regulation of dendrite extension	P	0	1	0	0.144718	1	1	OVER
GO:0001522	pseudouridine synthesis	P	0	1	0	0.144718	1	1	OVER
GO:1903859	regulation of dendrite extension	P	0	1	0	0.144718	1	1	OVER
GO:1901678	iron coordination entity transport	P	0	1	0	0.144718	1	1	OVER
GO:0046166	glyceraldehyde-3-phosphate biosynthetic process	P	0	1	0	0.144718	1	1	OVER
GO:0070849	response to epidermal growth factor	P	0	1	0	0.144718	1	1	OVER
GO:0016180	snRNA processing	P	0	1	0	0.144718	1	1	OVER
GO:0015091	ferric iron transmembrane transporter activity	F	0	1	0	0.144718	1	1	OVER
GO:0051702	interaction with symbiont	P	0	1	0	0.144718	1	1	OVER
GO:0051701	interaction with host	P	0	1	0	0.144718	1	1	OVER
GO:0098533	ATPase dependent transmembrane transport complex	C	0	1	0	0.144718	1	1	OVER
GO:0098531	"transcription factor activity, direct ligand regulated sequence-specific DNA binding"	F	0	1	0	0.144718	1	1	OVER
GO:1901653	cellular response to peptide	P	0	1	0	0.144718	1	1	OVER
GO:0015081	sodium ion transmembrane transporter activity	F	0	1	0	0.144718	1	1	OVER
GO:0018345	protein palmitoylation	P	0	1	0	0.144718	1	1	OVER
GO:0071918	urea transmembrane transport	P	0	1	0	0.144718	1	1	OVER
GO:1903829	positive regulation of cellular protein localization	P	0	1	0	0.144718	1	1	OVER
GO:1903828	negative regulation of cellular protein localization	P	0	1	0	0.144718	1	1	OVER
GO:0045055	regulated secretory pathway	P	0	1	0	0.144718	1	1	OVER
GO:0045053	protein retention in Golgi apparatus	P	0	1	0	0.144718	1	1	OVER
GO:0015079	potassium ion transmembrane transporter activity	F	0	1	0	0.144718	1	1	OVER
GO:2001070	starch binding	F	0	1	0	0.144718	1	1	OVER
GO:0048313	Golgi inheritance	P	0	1	0	0.144718	1	1	OVER
GO:0021700	developmental maturation	P	0	1	0	0.144718	1	1	OVER
GO:0007492	endoderm development	P	0	1	0	0.144718	1	1	OVER
GO:0048308	organelle inheritance	P	0	1	0	0.144718	1	1	OVER
GO:2001056	positive regulation of cysteine-type endopeptidase activity	P	0	1	0	0.144718	1	1	OVER
GO:0009650	UV protection	P	0	1	0	0.144718	1	1	OVER
GO:0008565	protein transporter activity	F	0	1	0	0.144718	1	1	OVER
GO:0019400	alditol metabolic process	P	0	1	0	0.144718	1	1	OVER
GO:0036361	"racemase activity, acting on amino acids and derivatives"	F	0	1	0	0.144718	1	1	OVER
GO:0006383	transcription from RNA polymerase III promoter	P	0	1	0	0.144718	1	1	OVER
GO:0008556	potassium-transporting ATPase activity	F	0	1	0	0.144718	1	1	OVER
GO:0010833	telomere maintenance via telomere lengthening	P	0	1	0	0.144718	1	1	OVER
GO:0035267	NuA4 histone acetyltransferase complex	C	0	1	0	0.144718	1	1	OVER
GO:0045010	actin nucleation	P	0	1	0	0.144718	1	1	OVER
GO:0004197	cysteine-type endopeptidase activity	F	0	1	0	0.144718	1	1	OVER
GO:0015036	disulfide oxidoreductase activity	F	0	1	0	0.144718	1	1	OVER
GO:0015035	protein disulfide oxidoreductase activity	F	0	1	0	0.144718	1	1	OVER
GO:0036344	platelet morphogenesis	P	0	1	0	0.144718	1	1	OVER
GO:0010822	positive regulation of mitochondrion organization	P	0	1	0	0.144718	1	1	OVER
GO:0010821	regulation of mitochondrion organization	P	0	1	0	0.144718	1	1	OVER
GO:0035259	glucocorticoid receptor binding	F	0	1	0	0.144718	1	1	OVER
GO:0035258	steroid hormone receptor binding	F	0	1	0	0.144718	1	1	OVER
GO:0035257	nuclear hormone receptor binding	F	0	1	0	0.144718	1	1	OVER
GO:0006367	transcription initiation from RNA polymerase II promoter	P	0	1	0	0.144718	1	1	OVER
GO:0035253	ciliary rootlet	C	0	1	0	0.144718	1	1	OVER
GO:0035250	UDP-galactosyltransferase activity	F	0	1	0	0.144718	1	1	OVER
GO:0008536	Ran GTPase binding	F	0	1	0	0.144718	1	1	OVER
GO:0010811	positive regulation of cell-substrate adhesion	P	0	1	0	0.144718	1	1	OVER
GO:0015012	heparan sulfate proteoglycan biosynthetic process	P	0	1	0	0.144718	1	1	OVER
GO:0008525	phosphatidylcholine transporter activity	F	0	1	0	0.144718	1	1	OVER
GO:0003081	regulation of systemic arterial blood pressure by renin-angiotensin	P	0	1	0	0.144718	1	1	OVER
GO:0010800	positive regulation of peptidyl-threonine phosphorylation	P	0	1	0	0.144718	1	1	OVER
GO:0052192	movement in environment of other organism involved in symbiotic interaction	P	0	1	0	0.144718	1	1	OVER
GO:0005254	chloride channel activity	F	0	1	0	0.144718	1	1	OVER
GO:0005253	anion channel activity	F	0	1	0	0.144718	1	1	OVER
GO:0015002	heme-copper terminal oxidase activity	F	0	1	0	0.144718	1	1	OVER
GO:0003073	regulation of systemic arterial blood pressure	P	0	1	0	0.144718	1	1	OVER
GO:0006338	chromatin remodeling	P	0	1	0	0.144718	1	1	OVER
GO:0005247	voltage-gated chloride channel activity	F	0	1	0	0.144718	1	1	OVER
GO:0034134	toll-like receptor 2 signaling pathway	P	0	1	0	0.144718	1	1	OVER
GO:0005245	voltage-gated calcium channel activity	F	0	1	0	0.144718	1	1	OVER
GO:0033044	regulation of chromosome organization	P	0	1	0	0.144718	1	1	OVER
GO:0051090	regulation of sequence-specific DNA binding transcription factor activity	P	0	1	0	0.144718	1	1	OVER
GO:0008509	anion transmembrane transporter activity	F	0	1	0	0.144718	1	1	OVER
GO:0007413	axonal fasciculation	P	0	1	0	0.144718	1	1	OVER
GO:0007411	axon guidance	P	0	1	0	0.144718	1	1	OVER
GO:0046777	protein autophosphorylation	P	0	1	0	0.144718	1	1	OVER
GO:0016799	"hydrolase activity, hydrolyzing N-glycosyl compounds"	F	0	1	0	0.144718	1	1	OVER
GO:0051082	unfolded protein binding	F	0	1	0	0.144718	1	1	OVER
GO:0004143	diacylglycerol kinase activity	F	0	1	0	0.144718	1	1	OVER
GO:0016790	thiolester hydrolase activity	F	0	1	0	0.144718	1	1	OVER
GO:0034112	positive regulation of homotypic cell-cell adhesion	P	0	1	0	0.144718	1	1	OVER
GO:0016782	"transferase activity, transferring sulfur-containing groups"	F	0	1	0	0.144718	1	1	OVER
GO:0015698	inorganic anion transport	P	0	1	0	0.144718	1	1	OVER
GO:0003044	regulation of systemic arterial blood pressure mediated by a chemical signal	P	0	1	0	0.144718	1	1	OVER
GO:0043495	protein anchor	F	0	1	0	0.144718	1	1	OVER
GO:0006303	double-strand break repair via nonhomologous end joining	P	0	1	0	0.144718	1	1	OVER
GO:0005219	ryanodine-sensitive calcium-release channel activity	F	0	1	0	0.144718	1	1	OVER
GO:0006302	double-strand break repair	P	0	1	0	0.144718	1	1	OVER
GO:0005218	intracellular ligand-gated calcium channel activity	F	0	1	0	0.144718	1	1	OVER
GO:0005217	intracellular ligand-gated ion channel activity	F	0	1	0	0.144718	1	1	OVER
GO:0016779	nucleotidyltransferase activity	F	0	1	0	0.144718	1	1	OVER
GO:0016778	diphosphotransferase activity	F	0	1	0	0.144718	1	1	OVER
GO:0004129	cytochrome-c oxidase activity	F	0	1	0	0.144718	1	1	OVER
GO:0045663	positive regulation of myoblast differentiation	P	0	1	0	0.144718	1	1	OVER
GO:0033013	tetrapyrrole metabolic process	P	0	1	0	0.144718	1	1	OVER
GO:0045661	regulation of myoblast differentiation	P	0	1	0	0.144718	1	1	OVER
GO:0043488	regulation of mRNA stability	P	0	1	0	0.144718	1	1	OVER
GO:0043487	regulation of RNA stability	P	0	1	0	0.144718	1	1	OVER
GO:0043484	regulation of RNA splicing	P	0	1	0	0.144718	1	1	OVER
GO:0042391	regulation of membrane potential	P	0	1	0	0.144718	1	1	OVER
GO:0016769	"transferase activity, transferring nitrogenous groups"	F	0	1	0	0.144718	1	1	OVER
GO:0051054	positive regulation of DNA metabolic process	P	0	1	0	0.144718	1	1	OVER
GO:0051052	regulation of DNA metabolic process	P	0	1	0	0.144718	1	1	OVER
GO:0016765	"transferase activity, transferring alkyl or aryl (other than methyl) groups"	F	0	1	0	0.144718	1	1	OVER
GO:0033002	muscle cell proliferation	P	0	1	0	0.144718	1	1	OVER
GO:0043470	regulation of carbohydrate catabolic process	P	0	1	0	0.144718	1	1	OVER
GO:0042383	sarcolemma	C	0	1	0	0.144718	1	1	OVER
GO:0016755	"transferase activity, transferring amino-acyl groups"	F	0	1	0	0.144718	1	1	OVER
GO:0004104	cholinesterase activity	F	0	1	0	0.144718	1	1	OVER
GO:0003014	renal system process	P	0	1	0	0.144718	1	1	OVER
GO:0003012	muscle system process	P	0	1	0	0.144718	1	1	OVER
GO:2000573	positive regulation of DNA biosynthetic process	P	0	1	0	0.144718	1	1	OVER
GO:0052126	movement in host environment	P	0	1	0	0.144718	1	1	OVER
GO:0016741	"transferase activity, transferring one-carbon groups"	F	0	1	0	0.144718	1	1	OVER
GO:0003007	heart morphogenesis	P	0	1	0	0.144718	1	1	OVER
GO:0070168	negative regulation of biomineral tissue development	P	0	1	0	0.144718	1	1	OVER
GO:0046718	viral entry into host cell	P	0	1	0	0.144718	1	1	OVER
GO:0070160	occluding junction	C	0	1	0	0.144718	1	1	OVER
GO:0006982	response to lipid hydroperoxide	P	0	1	0	0.144718	1	1	OVER
GO:0005891	voltage-gated calcium channel complex	C	0	1	0	0.144718	1	1	OVER
GO:0005890	sodium:potassium-exchanging ATPase complex	C	0	1	0	0.144718	1	1	OVER
GO:0072337	modified amino acid transport	P	0	1	0	0.144718	1	1	OVER
GO:0033692	cellular polysaccharide biosynthetic process	P	0	1	0	0.144718	1	1	OVER
GO:0090382	phagosome maturation	P	0	1	0	0.144718	1	1	OVER
GO:0018904	ether metabolic process	P	0	1	0	0.144718	1	1	OVER
GO:0016724	"oxidoreductase activity, oxidizing metal ions, oxygen as acceptor"	F	0	1	0	0.144718	1	1	OVER
GO:0051010	microtubule plus-end binding	F	0	1	0	0.144718	1	1	OVER
GO:0016722	"oxidoreductase activity, oxidizing metal ions"	F	0	1	0	0.144718	1	1	OVER
GO:0005881	cytoplasmic microtubule	C	0	1	0	0.144718	1	1	OVER
GO:0060397	JAK-STAT cascade involved in growth hormone signaling pathway	P	0	1	0	0.144718	1	1	OVER
GO:0060396	growth hormone receptor signaling pathway	P	0	1	0	0.144718	1	1	OVER
GO:1903142	positive regulation of establishment of endothelial barrier	P	0	1	0	0.144718	1	1	OVER
GO:1903140	regulation of establishment of endothelial barrier	P	0	1	0	0.144718	1	1	OVER
GO:0051005	negative regulation of lipoprotein lipase activity	P	0	1	0	0.144718	1	1	OVER
GO:0051004	regulation of lipoprotein lipase activity	P	0	1	0	0.144718	1	1	OVER
GO:0045603	positive regulation of endothelial cell differentiation	P	0	1	0	0.144718	1	1	OVER
GO:0005875	microtubule associated complex	C	0	1	0	0.144718	1	1	OVER
GO:0045601	regulation of endothelial cell differentiation	P	0	1	0	0.144718	1	1	OVER
GO:0010181	FMN binding	F	0	1	0	0.144718	1	1	OVER
GO:0071229	cellular response to acid chemical	P	0	1	0	0.144718	1	1	OVER
GO:0003697	single-stranded DNA binding	F	0	1	0	0.144718	1	1	OVER
GO:0006958	"complement activation, classical pathway"	P	0	1	0	0.144718	1	1	OVER
GO:0016706	"oxidoreductase activity, acting on paired donors, with incorporation or reduction of molecular oxygen, 2-oxoglutarate as one donor, and incorporation of one atom each of oxygen into both donors"	F	0	1	0	0.144718	1	1	OVER
GO:0043414	macromolecule methylation	P	0	1	0	0.144718	1	1	OVER
GO:0003684	damaged DNA binding	F	0	1	0	0.144718	1	1	OVER
GO:0003682	chromatin binding	F	0	1	0	0.144718	1	1	OVER
GO:0071214	cellular response to abiotic stimulus	P	0	1	0	0.144718	1	1	OVER
GO:0034739	histone deacetylase activity (H4-K16 specific)	F	0	1	0	0.144718	1	1	OVER
GO:0035821	modification of morphology or physiology of other organism	P	0	1	0	0.144718	1	1	OVER
GO:0051695	actin filament uncapping	P	0	1	0	0.144718	1	1	OVER
GO:0004751	ribose-5-phosphate isomerase activity	F	0	1	0	0.144718	1	1	OVER
GO:0002573	myeloid leukocyte differentiation	P	0	1	0	0.144718	1	1	OVER
GO:0000398	"mRNA splicing, via spliceosome"	P	0	1	0	0.144718	1	1	OVER
GO:0004749	ribose phosphate diphosphokinase activity	F	0	1	0	0.144718	1	1	OVER
GO:0004745	retinol dehydrogenase activity	F	0	1	0	0.144718	1	1	OVER
GO:0004743	pyruvate kinase activity	F	0	1	0	0.144718	1	1	OVER
GO:0060349	bone morphogenesis	P	0	1	0	0.144718	1	1	OVER
GO:0060348	bone development	P	0	1	0	0.144718	1	1	OVER
GO:0032543	mitochondrial translation	P	0	1	0	0.144718	1	1	OVER
GO:0006913	nucleocytoplasmic transport	P	0	1	0	0.144718	1	1	OVER
GO:0005826	actomyosin contractile ring	C	0	1	0	0.144718	1	1	OVER
GO:0004739	pyruvate dehydrogenase (acetyl-transferring) activity	F	0	1	0	0.144718	1	1	OVER
GO:0004738	pyruvate dehydrogenase activity	F	0	1	0	0.144718	1	1	OVER
GO:0090316	positive regulation of intracellular protein transport	P	0	1	0	0.144718	1	1	OVER
GO:0032536	regulation of cell projection size	P	0	1	0	0.144718	1	1	OVER
GO:0032532	regulation of microvillus length	P	0	1	0	0.144718	1	1	OVER
GO:0032530	regulation of microvillus organization	P	0	1	0	0.144718	1	1	OVER
GO:0071897	DNA biosynthetic process	P	0	1	0	0.144718	1	1	OVER
GO:0006907	pinocytosis	P	0	1	0	0.144718	1	1	OVER
GO:0006904	vesicle docking involved in exocytosis	P	0	1	0	0.144718	1	1	OVER
GO:0000377	"RNA splicing, via transesterification reactions with bulged adenosine as nucleophile"	P	0	1	0	0.144718	1	1	OVER
GO:0051668	localization within membrane	P	0	1	0	0.144718	1	1	OVER
GO:0000375	"RNA splicing, via transesterification reactions"	P	0	1	0	0.144718	1	1	OVER
GO:0033619	membrane protein proteolysis	P	0	1	0	0.144718	1	1	OVER
GO:0051665	membrane raft localization	P	0	1	0	0.144718	1	1	OVER
GO:0090307	mitotic spindle assembly	P	0	1	0	0.144718	1	1	OVER
GO:0090305	nucleic acid phosphodiester bond hydrolysis	P	0	1	0	0.144718	1	1	OVER
GO:0032528	microvillus organization	P	0	1	0	0.144718	1	1	OVER
GO:0032526	response to retinoic acid	P	0	1	0	0.144718	1	1	OVER
GO:0004722	protein serine/threonine phosphatase activity	F	0	1	0	0.144718	1	1	OVER
GO:0051656	establishment of organelle localization	P	0	1	0	0.144718	1	1	OVER
GO:0005802	trans-Golgi network	C	0	1	0	0.144718	1	1	OVER
GO:0048286	lung alveolus development	P	0	1	0	0.144718	1	1	OVER
GO:0004716	receptor signaling protein tyrosine kinase activity	F	0	1	0	0.144718	1	1	OVER
GO:0051650	establishment of vesicle localization	P	0	1	0	0.144718	1	1	OVER
GO:0042989	sequestering of actin monomers	P	0	1	0	0.144718	1	1	OVER
GO:0031420	alkali metal ion binding	F	0	1	0	0.144718	1	1	OVER
GO:0030331	estrogen receptor binding	F	0	1	0	0.144718	1	1	OVER
GO:0048278	vesicle docking	P	0	1	0	0.144718	1	1	OVER
GO:0004707	MAP kinase activity	F	0	1	0	0.144718	1	1	OVER
GO:0004702	receptor signaling protein serine/threonine kinase activity	F	0	1	0	0.144718	1	1	OVER
GO:0031419	cobalamin binding	F	0	1	0	0.144718	1	1	OVER
GO:0060306	regulation of membrane repolarization	P	0	1	0	0.144718	1	1	OVER
GO:0030329	prenylcysteine metabolic process	P	0	1	0	0.144718	1	1	OVER
GO:0030328	prenylcysteine catabolic process	P	0	1	0	0.144718	1	1	OVER
GO:0002521	leukocyte differentiation	P	0	1	0	0.144718	1	1	OVER
GO:0030324	lung development	P	0	1	0	0.144718	1	1	OVER
GO:0030323	respiratory tube development	P	0	1	0	0.144718	1	1	OVER
GO:0051639	actin filament network formation	P	0	1	0	0.144718	1	1	OVER
GO:0051638	barbed-end actin filament uncapping	P	0	1	0	0.144718	1	1	OVER
GO:0097372	NAD-dependent histone deacetylase activity (H3-K18 specific)	F	0	1	0	0.144718	1	1	OVER
GO:0030312	external encapsulating structure	C	0	1	0	0.144718	1	1	OVER
GO:0048251	elastic fiber assembly	P	0	1	0	0.144718	1	1	OVER
GO:0010799	regulation of peptidyl-threonine phosphorylation	P	0	1	0	0.144718	1	1	OVER
GO:0060998	regulation of dendritic spine development	P	0	1	0	0.144718	1	1	OVER
GO:0060997	dendritic spine morphogenesis	P	0	1	0	0.144718	1	1	OVER
GO:1903749	positive regulation of establishment of protein localization to mitochondrion	P	0	1	0	0.144718	1	1	OVER
GO:0060996	dendritic spine development	P	0	1	0	0.144718	1	1	OVER
GO:1903747	regulation of establishment of protein localization to mitochondrion	P	0	1	0	0.144718	1	1	OVER
GO:1901568	fatty acid derivative metabolic process	P	0	1	0	0.144718	1	1	OVER
GO:0051606	detection of stimulus	P	0	1	0	0.144718	1	1	OVER
GO:0048232	male gamete generation	P	0	1	0	0.144718	1	1	OVER
GO:0016073	snRNA metabolic process	P	0	1	0	0.144718	1	1	OVER
GO:0000301	"retrograde transport, vesicle recycling within Golgi"	P	0	1	0	0.144718	1	1	OVER
GO:0009584	detection of visible light	P	0	1	0	0.144718	1	1	OVER
GO:0009583	detection of light stimulus	P	0	1	0	0.144718	1	1	OVER
GO:1901552	positive regulation of endothelial cell development	P	0	1	0	0.144718	1	1	OVER
GO:0009582	detection of abiotic stimulus	P	0	1	0	0.144718	1	1	OVER
GO:0009581	detection of external stimulus	P	0	1	0	0.144718	1	1	OVER
GO:1901550	regulation of endothelial cell development	P	0	1	0	0.144718	1	1	OVER
GO:0036293	response to decreased oxygen levels	P	0	1	0	0.144718	1	1	OVER
GO:0010766	negative regulation of sodium ion transport	P	0	1	0	0.144718	1	1	OVER
GO:0008483	transaminase activity	F	0	1	0	0.144718	1	1	OVER
GO:0071805	potassium ion transmembrane transport	P	0	1	0	0.144718	1	1	OVER
GO:0071804	cellular potassium ion transport	P	0	1	0	0.144718	1	1	OVER
GO:0071801	regulation of podosome assembly	P	0	1	0	0.144718	1	1	OVER
GO:0071800	podosome assembly	P	0	1	0	0.144718	1	1	OVER
GO:0016050	vesicle organization	P	0	1	0	0.144718	1	1	OVER
GO:0009566	fertilization	P	0	1	0	0.144718	1	1	OVER
GO:0035189	Rb-E2F complex	C	0	1	0	0.144718	1	1	OVER
GO:0017136	NAD-dependent histone deacetylase activity	F	0	1	0	0.144718	1	1	OVER
GO:0018210	peptidyl-threonine modification	P	0	1	0	0.144718	1	1	OVER
GO:0097306	cellular response to alcohol	P	0	1	0	0.144718	1	1	OVER
GO:0097305	response to alcohol	P	0	1	0	0.144718	1	1	OVER
GO:0007369	gastrulation	P	0	1	0	0.144718	1	1	OVER
GO:0018205	peptidyl-lysine modification	P	0	1	0	0.144718	1	1	OVER
GO:0017119	Golgi transport complex	C	0	1	0	0.144718	1	1	OVER
GO:0006278	RNA-dependent DNA replication	P	0	1	0	0.144718	1	1	OVER
GO:0046006	regulation of activated T cell proliferation	P	0	1	0	0.144718	1	1	OVER
GO:0006275	regulation of DNA replication	P	0	1	0	0.144718	1	1	OVER
GO:0030955	potassium ion binding	F	0	1	0	0.144718	1	1	OVER
GO:0034062	RNA polymerase activity	F	0	1	0	0.144718	1	1	OVER
GO:0010714	positive regulation of collagen metabolic process	P	0	1	0	0.144718	1	1	OVER
GO:0008430	selenium binding	F	0	1	0	0.144718	1	1	OVER
GO:0036230	granulocyte activation	P	0	1	0	0.144718	1	1	OVER
GO:0005164	tumor necrosis factor receptor binding	F	0	1	0	0.144718	1	1	OVER
GO:0048875	chemical homeostasis within a tissue	P	0	1	0	0.144718	1	1	OVER
GO:0007338	single fertilization	P	0	1	0	0.144718	1	1	OVER
GO:0048872	homeostasis of number of cells	P	0	1	0	0.144718	1	1	OVER
GO:0004063	aryldialkylphosphatase activity	F	0	1	0	0.144718	1	1	OVER
GO:0048864	stem cell development	P	0	1	0	0.144718	1	1	OVER
GO:0048863	stem cell differentiation	P	0	1	0	0.144718	1	1	OVER
GO:0004056	argininosuccinate lyase activity	F	0	1	0	0.144718	1	1	OVER
GO:0008408	3'-5' exonuclease activity	F	0	1	0	0.144718	1	1	OVER
GO:0018874	benzoate metabolic process	P	0	1	0	0.144718	1	1	OVER
GO:0000922	spindle pole	C	0	1	0	0.144718	1	1	OVER
GO:0004033	aldo-keto reductase (NADP) activity	F	0	1	0	0.144718	1	1	OVER
GO:0043395	heparan sulfate proteoglycan binding	F	0	1	0	0.144718	1	1	OVER
GO:0006206	pyrimidine nucleobase metabolic process	P	0	1	0	0.144718	1	1	OVER
GO:0016676	"oxidoreductase activity, acting on a heme group of donors, oxygen as acceptor"	F	0	1	0	0.144718	1	1	OVER
GO:0016675	"oxidoreductase activity, acting on a heme group of donors"	F	0	1	0	0.144718	1	1	OVER
GO:0004012	phospholipid-translocating ATPase activity	F	0	1	0	0.144718	1	1	OVER
GO:0048814	regulation of dendrite morphogenesis	P	0	1	0	0.144718	1	1	OVER
GO:0048813	dendrite morphogenesis	P	0	1	0	0.144718	1	1	OVER
GO:0004003	ATP-dependent DNA helicase activity	F	0	1	0	0.144718	1	1	OVER
GO:0044456	synapse part	C	0	1	0	0.144718	1	1	OVER
GO:0044455	mitochondrial membrane part	C	0	1	0	0.144718	1	1	OVER
GO:0044452	nucleolar part	C	0	1	0	0.144718	1	1	OVER
GO:0019915	lipid storage	P	0	1	0	0.144718	1	1	OVER
GO:0042274	ribosomal small subunit biogenesis	P	0	1	0	0.144718	1	1	OVER
GO:0070076	histone lysine demethylation	P	0	1	0	0.144718	1	1	OVER
GO:0006891	intra-Golgi vesicle-mediated transport	P	0	1	0	0.144718	1	1	OVER
GO:0044449	contractile fiber part	C	0	1	0	0.144718	1	1	OVER
GO:0019902	phosphatase binding	F	0	1	0	0.144718	1	1	OVER
GO:0070069	cytochrome complex	C	0	1	0	0.144718	1	1	OVER
GO:0019901	protein kinase binding	F	0	1	0	0.144718	1	1	OVER
GO:0019900	kinase binding	F	0	1	0	0.144718	1	1	OVER
GO:0006885	regulation of pH	P	0	1	0	0.144718	1	1	OVER
GO:0005798	Golgi-associated vesicle	C	0	1	0	0.144718	1	1	OVER
GO:0005793	endoplasmic reticulum-Golgi intermediate compartment	C	0	1	0	0.144718	1	1	OVER
GO:0016624	"oxidoreductase activity, acting on the aldehyde or oxo group of donors, disulfide as acceptor"	F	0	1	0	0.144718	1	1	OVER
GO:0016620	"oxidoreductase activity, acting on the aldehyde or oxo group of donors, NAD or NADP as acceptor"	F	0	1	0	0.144718	1	1	OVER
GO:1903046	meiotic cell cycle process	P	0	1	0	0.144718	1	1	OVER
GO:0033572	transferrin transport	P	0	1	0	0.144718	1	1	OVER
GO:0090263	positive regulation of canonical Wnt signaling pathway	P	0	1	0	0.144718	1	1	OVER
GO:1903039	positive regulation of leukocyte cell-cell adhesion	P	0	1	0	0.144718	1	1	OVER
GO:0031398	positive regulation of protein ubiquitination	P	0	1	0	0.144718	1	1	OVER
GO:0031397	negative regulation of protein ubiquitination	P	0	1	0	0.144718	1	1	OVER
GO:0031396	regulation of protein ubiquitination	P	0	1	0	0.144718	1	1	OVER
GO:0006855	drug transmembrane transport	P	0	1	0	0.144718	1	1	OVER
GO:0006851	mitochondrial calcium ion transport	P	0	1	0	0.144718	1	1	OVER
GO:0044409	entry into host	P	0	1	0	0.144718	1	1	OVER
GO:2000427	positive regulation of apoptotic cell clearance	P	0	1	0	0.144718	1	1	OVER
GO:2000425	regulation of apoptotic cell clearance	P	0	1	0	0.144718	1	1	OVER
GO:0043312	neutrophil degranulation	P	0	1	0	0.144718	1	1	OVER
GO:0005759	mitochondrial matrix	C	0	1	0	0.144718	1	1	OVER
GO:0034644	cellular response to UV	P	0	1	0	0.144718	1	1	OVER
GO:0033559	unsaturated fatty acid metabolic process	P	0	1	0	0.144718	1	1	OVER
GO:0033558	protein deacetylase activity	F	0	1	0	0.144718	1	1	OVER
GO:0042219	cellular modified amino acid catabolic process	P	0	1	0	0.144718	1	1	OVER
GO:0071107	response to parathyroid hormone	P	0	1	0	0.144718	1	1	OVER
GO:0002483	antigen processing and presentation of endogenous peptide antigen	P	0	1	0	0.144718	1	1	OVER
GO:0030286	dynein complex	C	0	1	0	0.144718	1	1	OVER
GO:0035725	sodium ion transmembrane transport	P	0	1	0	0.144718	1	1	OVER
GO:0005743	mitochondrial inner membrane	C	0	1	0	0.144718	1	1	OVER
GO:0005740	mitochondrial envelope	C	0	1	0	0.144718	1	1	OVER
GO:0032452	histone demethylase activity	F	0	1	0	0.144718	1	1	OVER
GO:0002479	"antigen processing and presentation of exogenous peptide antigen via MHC class I, TAP-dependent"	P	0	1	0	0.144718	1	1	OVER
GO:0032451	demethylase activity	F	0	1	0	0.144718	1	1	OVER
GO:0002478	antigen processing and presentation of exogenous peptide antigen	P	0	1	0	0.144718	1	1	OVER
GO:0070006	metalloaminopeptidase activity	F	0	1	0	0.144718	1	1	OVER
GO:0030278	regulation of ossification	P	0	1	0	0.144718	1	1	OVER
GO:0006825	copper ion transport	P	0	1	0	0.144718	1	1	OVER
GO:0006821	chloride transport	P	0	1	0	0.144718	1	1	OVER
GO:0005731	nucleolus organizer region	C	0	1	0	0.144718	1	1	OVER
GO:0030260	entry into host cell	P	0	1	0	0.144718	1	1	OVER
GO:0034612	response to tumor necrosis factor	P	0	1	0	0.144718	1	1	OVER
GO:0004630	phospholipase D activity	F	0	1	0	0.144718	1	1	OVER
GO:0031348	negative regulation of defense response	P	0	1	0	0.144718	1	1	OVER
GO:0032432	actin filament bundle	C	0	1	0	0.144718	1	1	OVER
GO:0000279	M phase	P	0	1	0	0.144718	1	1	OVER
GO:0006803	obsolete glutathione conjugation reaction	P	0	1	0	0.144718	1	1	OVER
GO:0034605	cellular response to heat	P	0	1	0	0.144718	1	1	OVER
GO:0052650	NADP-retinol dehydrogenase activity	F	0	1	0	0.144718	1	1	OVER
GO:0000271	polysaccharide biosynthetic process	P	0	1	0	0.144718	1	1	OVER
GO:0048193	Golgi vesicle transport	P	0	1	0	0.144718	1	1	OVER
GO:0004622	lysophospholipase activity	F	0	1	0	0.144718	1	1	OVER
GO:0004621	glycosylphosphatidylinositol phospholipase D activity	F	0	1	0	0.144718	1	1	OVER
GO:0031334	positive regulation of protein complex assembly	P	0	1	0	0.144718	1	1	OVER
GO:0002446	neutrophil mediated immunity	P	0	1	0	0.144718	1	1	OVER
GO:0002444	myeloid leukocyte mediated immunity	P	0	1	0	0.144718	1	1	OVER
GO:0002440	production of molecular mediator of immune response	P	0	1	0	0.144718	1	1	OVER
GO:0032413	negative regulation of ion transmembrane transporter activity	P	0	1	0	0.144718	1	1	OVER
GO:0032412	regulation of ion transmembrane transporter activity	P	0	1	0	0.144718	1	1	OVER
GO:0032411	positive regulation of transporter activity	P	0	1	0	0.144718	1	1	OVER
GO:0032410	negative regulation of transporter activity	P	0	1	0	0.144718	1	1	OVER
GO:1903689	"regulation of wound healing, spreading of epidermal cells"	P	0	1	0	0.144718	1	1	OVER
GO:0030239	myofibril assembly	P	0	1	0	0.144718	1	1	OVER
GO:0042887	amide transmembrane transporter activity	F	0	1	0	0.144718	1	1	OVER
GO:0002433	immune response-regulating cell surface receptor signaling pathway involved in phagocytosis	P	0	1	0	0.144718	1	1	OVER
GO:0071773	cellular response to BMP stimulus	P	0	1	0	0.144718	1	1	OVER
GO:0002431	Fc receptor mediated stimulatory signaling pathway	P	0	1	0	0.144718	1	1	OVER
GO:0071772	response to BMP	P	0	1	0	0.144718	1	1	OVER
GO:1902593	single-organism nuclear import	P	0	1	0	0.144718	1	1	OVER
GO:0051540	metal cluster binding	F	0	1	0	0.144718	1	1	OVER
GO:0004602	glutathione peroxidase activity	F	0	1	0	0.144718	1	1	OVER
GO:0043968	histone H2A acetylation	P	0	1	0	0.144718	1	1	OVER
GO:0043967	histone H4 acetylation	P	0	1	0	0.144718	1	1	OVER
GO:0030228	lipoprotein particle receptor activity	F	0	1	0	0.144718	1	1	OVER
GO:0097284	hepatocyte apoptotic process	P	0	1	0	0.144718	1	1	OVER
GO:0030224	monocyte differentiation	P	0	1	0	0.144718	1	1	OVER
GO:0097283	keratinocyte apoptotic process	P	0	1	0	0.144718	1	1	OVER
GO:0030220	platelet formation	P	0	1	0	0.144718	1	1	OVER
GO:0051536	iron-sulfur cluster binding	F	0	1	0	0.144718	1	1	OVER
GO:0048167	regulation of synaptic plasticity	P	0	1	0	0.144718	1	1	OVER
GO:0071757	hexameric IgM immunoglobulin complex	C	0	1	0	0.144718	1	1	OVER
GO:0071756	pentameric IgM immunoglobulin complex	C	0	1	0	0.144718	1	1	OVER
GO:0071754	"IgM immunoglobulin complex, circulating"	C	0	1	0	0.144718	1	1	OVER
GO:0071753	IgM immunoglobulin complex	C	0	1	0	0.144718	1	1	OVER
GO:0071750	dimeric IgA immunoglobulin complex	C	0	1	0	0.144718	1	1	OVER
GO:0070665	positive regulation of leukocyte proliferation	P	0	1	0	0.144718	1	1	OVER
GO:0021543	pallium development	P	0	1	0	0.144718	1	1	OVER
GO:0071749	polymeric IgA immunoglobulin complex	C	0	1	0	0.144718	1	1	OVER
GO:0071746	"IgA immunoglobulin complex, circulating"	C	0	1	0	0.144718	1	1	OVER
GO:0071745	IgA immunoglobulin complex	C	0	1	0	0.144718	1	1	OVER
GO:1903651	positive regulation of cytoplasmic transport	P	0	1	0	0.144718	1	1	OVER
GO:0017080	sodium channel regulator activity	F	0	1	0	0.144718	1	1	OVER
GO:0030201	heparan sulfate proteoglycan metabolic process	P	0	1	0	0.144718	1	1	OVER
GO:1902562	H4 histone acetyltransferase complex	C	0	1	0	0.144718	1	1	OVER
GO:0022624	proteasome accessory complex	C	0	1	0	0.144718	1	1	OVER
GO:0010694	positive regulation of alkaline phosphatase activity	P	0	1	0	0.144718	1	1	OVER
GO:0010692	regulation of alkaline phosphatase activity	P	0	1	0	0.144718	1	1	OVER
GO:0042834	peptidoglycan binding	F	0	1	0	0.144718	1	1	OVER
GO:0097242	beta-amyloid clearance	P	0	1	0	0.144718	1	1	OVER
GO:0042827	platelet dense granule	C	0	1	0	0.144718	1	1	OVER
GO:0019221	cytokine-mediated signaling pathway	P	0	1	0	0.144718	1	1	OVER
GO:0071709	membrane assembly	P	0	1	0	0.144718	1	1	OVER
GO:0043902	positive regulation of multi-organism process	P	0	1	0	0.144718	1	1	OVER
GO:0031975	envelope	C	0	1	0	0.144718	1	1	OVER
GO:0001990	regulation of systemic arterial blood pressure by hormone	P	0	1	0	0.144718	1	1	OVER
GO:0019218	regulation of steroid metabolic process	P	0	1	0	0.144718	1	1	OVER
GO:0019217	regulation of fatty acid metabolic process	P	0	1	0	0.144718	1	1	OVER
GO:0008374	O-acyltransferase activity	F	0	1	0	0.144718	1	1	OVER
GO:0019213	deacetylase activity	F	0	1	0	0.144718	1	1	OVER
GO:0019211	phosphatase activator activity	F	0	1	0	0.144718	1	1	OVER
GO:0007283	spermatogenesis	P	0	1	0	0.144718	1	1	OVER
GO:0017038	protein import	P	0	1	0	0.144718	1	1	OVER
GO:0031967	organelle envelope	C	0	1	0	0.144718	1	1	OVER
GO:0031966	mitochondrial membrane	C	0	1	0	0.144718	1	1	OVER
GO:0030874	nucleolar chromatin	C	0	1	0	0.144718	1	1	OVER
GO:0019208	phosphatase regulator activity	F	0	1	0	0.144718	1	1	OVER
GO:0009451	RNA modification	P	0	1	0	0.144718	1	1	OVER
GO:0019203	carbohydrate phosphatase activity	F	0	1	0	0.144718	1	1	OVER
GO:0008360	regulation of cell shape	P	0	1	0	0.144718	1	1	OVER
GO:0018112	proline racemase activity	F	0	1	0	0.144718	1	1	OVER
GO:0017022	myosin binding	F	0	1	0	0.144718	1	1	OVER
GO:0005093	Rab GDP-dissociation inhibitor activity	F	0	1	0	0.144718	1	1	OVER
GO:0005092	GDP-dissociation inhibitor activity	F	0	1	0	0.144718	1	1	OVER
GO:0018107	peptidyl-threonine phosphorylation	P	0	1	0	0.144718	1	1	OVER
GO:0017016	Ras GTPase binding	F	0	1	0	0.144718	1	1	OVER
GO:0005089	Rho guanyl-nucleotide exchange factor activity	F	0	1	0	0.144718	1	1	OVER
GO:0005088	Ras guanyl-nucleotide exchange factor activity	F	0	1	0	0.144718	1	1	OVER
GO:0030858	positive regulation of epithelial cell differentiation	P	0	1	0	0.144718	1	1	OVER
GO:0005086	ARF guanyl-nucleotide exchange factor activity	F	0	1	0	0.144718	1	1	OVER
GO:0030856	regulation of epithelial cell differentiation	P	0	1	0	0.144718	1	1	OVER
GO:0030855	epithelial cell differentiation	P	0	1	0	0.144718	1	1	OVER
GO:0005080	protein kinase C binding	F	0	1	0	0.144718	1	1	OVER
GO:0030850	prostate gland development	P	0	1	0	0.144718	1	1	OVER
GO:0007259	JAK-STAT cascade	P	0	1	0	0.144718	1	1	OVER
GO:0035058	nonmotile primary cilium assembly	P	0	1	0	0.144718	1	1	OVER
GO:0007254	JNK cascade	P	0	1	0	0.144718	1	1	OVER
GO:0035051	cardiocyte differentiation	P	0	1	0	0.144718	1	1	OVER
GO:0001955	blood vessel maturation	P	0	1	0	0.144718	1	1	OVER
GO:0048786	presynaptic active zone	C	0	1	0	0.144718	1	1	OVER
GO:0019897	extrinsic component of plasma membrane	C	0	1	0	0.144718	1	1	OVER
GO:0008331	high voltage-gated calcium channel activity	F	0	1	0	0.144718	1	1	OVER
GO:0030838	positive regulation of actin filament polymerization	P	0	1	0	0.144718	1	1	OVER
GO:0030836	positive regulation of actin filament depolymerization	P	0	1	0	0.144718	1	1	OVER
GO:0009411	response to UV	P	0	1	0	0.144718	1	1	OVER
GO:0019888	protein phosphatase regulator activity	F	0	1	0	0.144718	1	1	OVER
GO:0019885	antigen processing and presentation of endogenous peptide antigen via MHC class I	P	0	1	0	0.144718	1	1	OVER
GO:0019884	antigen processing and presentation of exogenous antigen	P	0	1	0	0.144718	1	1	OVER
GO:0019883	antigen processing and presentation of endogenous antigen	P	0	1	0	0.144718	1	1	OVER
GO:0048771	tissue remodeling	P	0	1	0	0.144718	1	1	OVER
GO:0046597	negative regulation of viral entry into host cell	P	0	1	0	0.144718	1	1	OVER
GO:0046596	regulation of viral entry into host cell	P	0	1	0	0.144718	1	1	OVER
GO:0005055	laminin receptor activity	F	0	1	0	0.144718	1	1	OVER
GO:0009408	response to heat	P	0	1	0	0.144718	1	1	OVER
GO:0001931	uropod	C	0	1	0	0.144718	1	1	OVER
GO:0048762	mesenchymal cell differentiation	P	0	1	0	0.144718	1	1	OVER
GO:0007224	smoothened signaling pathway	P	0	1	0	0.144718	1	1	OVER
GO:0019871	sodium channel inhibitor activity	F	0	1	0	0.144718	1	1	OVER
GO:0019870	potassium channel inhibitor activity	F	0	1	0	0.144718	1	1	OVER
GO:0035023	regulation of Rho protein signal transduction	P	0	1	0	0.144718	1	1	OVER
GO:0031902	late endosome membrane	C	0	1	0	0.144718	1	1	OVER
GO:0031901	early endosome membrane	C	0	1	0	0.144718	1	1	OVER
GO:0045494	photoreceptor cell maintenance	P	0	1	0	0.144718	1	1	OVER
GO:0005041	low-density lipoprotein receptor activity	F	0	1	0	0.144718	1	1	OVER
GO:0008308	voltage-gated anion channel activity	F	0	1	0	0.144718	1	1	OVER
GO:0019866	organelle inner membrane	C	0	1	0	0.144718	1	1	OVER
GO:0007213	G-protein coupled acetylcholine receptor signaling pathway	P	0	1	0	0.144718	1	1	OVER
GO:0047661	amino-acid racemase activity	F	0	1	0	0.144718	1	1	OVER
GO:0006123	"mitochondrial electron transport, cytochrome c to oxygen"	P	0	1	0	0.144718	1	1	OVER
GO:0016592	mediator complex	C	0	1	0	0.144718	1	1	OVER
GO:0044391	ribosomal subunit	C	0	1	0	0.144718	1	1	OVER
GO:0007205	protein kinase C-activating G-protein coupled receptor signaling pathway	P	0	1	0	0.144718	1	1	OVER
GO:0005021	vascular endothelial growth factor-activated receptor activity	F	0	1	0	0.144718	1	1	OVER
GO:0043299	leukocyte degranulation	P	0	1	0	0.144718	1	1	OVER
GO:0048738	cardiac muscle tissue development	P	0	1	0	0.144718	1	1	OVER
GO:0043296	apical junction complex	C	0	1	0	0.144718	1	1	OVER
GO:0043292	contractile fiber	C	0	1	0	0.144718	1	1	OVER
GO:0006109	regulation of carbohydrate metabolic process	P	0	1	0	0.144718	1	1	OVER
GO:0019840	isoprenoid binding	F	0	1	0	0.144718	1	1	OVER
GO:0005019	platelet-derived growth factor beta-receptor activity	F	0	1	0	0.144718	1	1	OVER
GO:0006102	isocitrate metabolic process	P	0	1	0	0.144718	1	1	OVER
GO:0005017	platelet-derived growth factor-activated receptor activity	F	0	1	0	0.144718	1	1	OVER
GO:0016577	histone demethylation	P	0	1	0	0.144718	1	1	OVER
GO:0016575	histone deacetylation	P	0	1	0	0.144718	1	1	OVER
GO:0016573	histone acetylation	P	0	1	0	0.144718	1	1	OVER
GO:0043280	positive regulation of cysteine-type endopeptidase activity involved in apoptotic process	P	0	1	0	0.144718	1	1	OVER
GO:0045446	endothelial cell differentiation	P	0	1	0	0.144718	1	1	OVER
GO:0045445	myoblast differentiation	P	0	1	0	0.144718	1	1	OVER
GO:0044354	macropinosome	C	0	1	0	0.144718	1	1	OVER
GO:0044352	pinosome	C	0	1	0	0.144718	1	1	OVER
GO:0043267	negative regulation of potassium ion transport	P	0	1	0	0.144718	1	1	OVER
GO:0044351	macropinocytosis	P	0	1	0	0.144718	1	1	OVER
GO:0043266	regulation of potassium ion transport	P	0	1	0	0.144718	1	1	OVER
GO:0048705	skeletal system morphogenesis	P	0	1	0	0.144718	1	1	OVER
GO:1904063	negative regulation of cation transmembrane transport	P	0	1	0	0.144718	1	1	OVER
GO:1904062	regulation of cation transmembrane transport	P	0	1	0	0.144718	1	1	OVER
GO:0047617	acyl-CoA hydrolase activity	F	0	1	0	0.144718	1	1	OVER
GO:0015459	potassium channel regulator activity	F	0	1	0	0.144718	1	1	OVER
GO:0042161	lipoprotein oxidation	P	0	1	0	0.144718	1	1	OVER
GO:0042160	lipoprotein modification	P	0	1	0	0.144718	1	1	OVER
GO:0043243	positive regulation of protein complex disassembly	P	0	1	0	0.144718	1	1	OVER
GO:0042158	lipoprotein biosynthetic process	P	0	1	0	0.144718	1	1	OVER
GO:0006778	porphyrin-containing compound metabolic process	P	0	1	0	0.144718	1	1	OVER
GO:0016529	sarcoplasmic reticulum	C	0	1	0	0.144718	1	1	OVER
GO:0006771	riboflavin metabolic process	P	0	1	0	0.144718	1	1	OVER
GO:0005681	spliceosomal complex	C	0	1	0	0.144718	1	1	OVER
GO:0044325	ion channel binding	F	0	1	0	0.144718	1	1	OVER
GO:0090175	regulation of establishment of planar polarity	P	0	1	0	0.144718	1	1	OVER
GO:0090170	regulation of Golgi inheritance	P	0	1	0	0.144718	1	1	OVER
GO:0060192	negative regulation of lipase activity	P	0	1	0	0.144718	1	1	OVER
GO:0060191	regulation of lipase activity	P	0	1	0	0.144718	1	1	OVER
GO:0006769	nicotinamide metabolic process	P	0	1	0	0.144718	1	1	OVER
GO:0006768	biotin metabolic process	P	0	1	0	0.144718	1	1	OVER
GO:0044319	"wound healing, spreading of cells"	P	0	1	0	0.144718	1	1	OVER
GO:0005674	transcription factor TFIIF complex	C	0	1	0	0.144718	1	1	OVER
GO:0032388	positive regulation of intracellular transport	P	0	1	0	0.144718	1	1	OVER
GO:0032383	regulation of intracellular cholesterol transport	P	0	1	0	0.144718	1	1	OVER
GO:0032380	regulation of intracellular sterol transport	P	0	1	0	0.144718	1	1	OVER
GO:0032377	regulation of intracellular lipid transport	P	0	1	0	0.144718	1	1	OVER
GO:0004571	"mannosyl-oligosaccharide 1,2-alpha-mannosidase activity"	F	0	1	0	0.144718	1	1	OVER
GO:0071013	catalytic step 2 spliceosome	C	0	1	0	0.144718	1	1	OVER
GO:0043209	myelin sheath	C	0	1	0	0.144718	1	1	OVER
GO:0032367	intracellular cholesterol transport	P	0	1	0	0.144718	1	1	OVER
GO:0032366	intracellular sterol transport	P	0	1	0	0.144718	1	1	OVER
GO:0043206	extracellular fibril organization	P	0	1	0	0.144718	1	1	OVER
GO:0032365	intracellular lipid transport	P	0	1	0	0.144718	1	1	OVER
GO:0043205	fibril	C	0	1	0	0.144718	1	1	OVER
GO:0042119	neutrophil activation	P	0	1	0	0.144718	1	1	OVER
GO:0004551	nucleotide diphosphatase activity	F	0	1	0	0.144718	1	1	OVER
GO:0032355	response to estradiol	P	0	1	0	0.144718	1	1	OVER
GO:0002377	immunoglobulin production	P	0	1	0	0.144718	1	1	OVER
GO:0042104	positive regulation of activated T cell proliferation	P	0	1	0	0.144718	1	1	OVER
GO:0042102	positive regulation of T cell proliferation	P	0	1	0	0.144718	1	1	OVER
GO:0030177	positive regulation of Wnt signaling pathway	P	0	1	0	0.144718	1	1	OVER
GO:0030175	filopodium	C	0	1	0	0.144718	1	1	OVER
GO:0031254	cell trailing edge	C	0	1	0	0.144718	1	1	OVER
GO:0002366	leukocyte activation involved in immune response	P	0	1	0	0.144718	1	1	OVER
GO:0030166	proteoglycan biosynthetic process	P	0	1	0	0.144718	1	1	OVER
GO:0035601	protein deacylation	P	0	1	0	0.144718	1	1	OVER
GO:0031248	protein acetyltransferase complex	C	0	1	0	0.144718	1	1	OVER
GO:0071695	anatomical structure maturation	P	0	1	0	0.144718	1	1	OVER
GO:0000178	exosome (RNase complex)	C	0	1	0	0.144718	1	1	OVER
GO:0005618	cell wall	C	0	1	0	0.144718	1	1	OVER
GO:0034504	protein localization to nucleus	P	0	1	0	0.144718	1	1	OVER
GO:0090108	positive regulation of high-density lipoprotein particle assembly	P	0	1	0	0.144718	1	1	OVER
GO:0004528	phosphodiesterase I activity	F	0	1	0	0.144718	1	1	OVER
GO:0090107	regulation of high-density lipoprotein particle assembly	P	0	1	0	0.144718	1	1	OVER
GO:1990266	neutrophil migration	P	0	1	0	0.144718	1	1	OVER
GO:0031235	intrinsic component of the cytoplasmic side of the plasma membrane	C	0	1	0	0.144718	1	1	OVER
GO:0042799	histone methyltransferase activity (H4-K20 specific)	F	0	1	0	0.144718	1	1	OVER
GO:0031232	extrinsic component of external side of plasma membrane	C	0	1	0	0.144718	1	1	OVER
GO:0030140	trans-Golgi network transport vesicle	C	0	1	0	0.144718	1	1	OVER
GO:0005604	basement membrane	C	0	1	0	0.144718	1	1	OVER
GO:0030136	clathrin-coated vesicle	C	0	1	0	0.144718	1	1	OVER
GO:0030135	coated vesicle	C	0	1	0	0.144718	1	1	OVER
GO:0097193	intrinsic apoptotic signaling pathway	P	0	1	0	0.144718	1	1	OVER
GO:0030133	transport vesicle	C	0	1	0	0.144718	1	1	OVER
GO:0030132	clathrin coat of coated pit	C	0	1	0	0.144718	1	1	OVER
GO:0070585	protein localization to mitochondrion	P	0	1	0	0.144718	1	1	OVER
GO:0030130	clathrin coat of trans-Golgi network vesicle	C	0	1	0	0.144718	1	1	OVER
GO:1902493	acetyltransferase complex	C	0	1	0	0.144718	1	1	OVER
[truncated: 397 more rows]

## Sheet: 3h
GO-ID	Term	Category	#Diff	#Ref	%Diff	%Ref	P-Value	FDR	Over/Under	DiffSeqs
GO:0020037	heme binding	F	6	11	13.9535	1.5919	1.70484e-05	0.0259078	OVER	P60529, J9JHF7, P60524, F1PYZ1, F1P8V6, P00011
GO:0046906	tetrapyrrole binding	F	6	12	13.9535	1.73661	3.24809e-05	0.0259078	OVER	P60529, J9JHF7, P60524, F1PYZ1, F1P8V6, P00011
GO:0015671	oxygen transport	P	5	8	11.6279	1.15774	4.02294e-05	0.0259078	OVER	P60529, J9JHF7, P60524, F1PYZ1, F1P8V6
GO:0015669	gas transport	P	5	8	11.6279	1.15774	4.02294e-05	0.0259078	OVER	P60529, J9JHF7, P60524, F1PYZ1, F1P8V6
GO:0019825	oxygen binding	F	5	8	11.6279	1.15774	4.02294e-05	0.0259078	OVER	P60529, J9JHF7, P60524, F1PYZ1, F1P8V6
GO:0005833	hemoglobin complex	C	4	8	9.30233	1.15774	0.000828422	0.444586	OVER	P60529, J9JHF7, P60524, F1PYZ1
GO:0022904	respiratory electron transport chain	P	2	2	4.65116	0.289436	0.00395792	1	OVER	C4MW55, P00011
GO:0022900	electron transport chain	P	2	2	4.65116	0.289436	0.00395792	1	OVER	C4MW55, P00011
GO:0009055	electron carrier activity	F	2	2	4.65116	0.289436	0.00395792	1	OVER	C4MW55, P00011
GO:0042775	mitochondrial ATP synthesis coupled electron transport	P	2	2	4.65116	0.289436	0.00395792	1	OVER	C4MW55, P00011
GO:0042773	ATP synthesis coupled electron transport	P	2	2	4.65116	0.289436	0.00395792	1	OVER	C4MW55, P00011
GO:0016459	myosin complex	C	3	6	6.97674	0.868307	0.00420076	1	OVER	J9NU17, J9P5Z0, J9P992
GO:0005506	iron ion binding	F	4	12	9.30233	1.73661	0.00484819	1	OVER	P60529, J9JHF7, P60524, F1PYZ1
GO:0044445	cytosolic part	C	4	13	9.30233	1.88133	0.00668017	1	OVER	P60529, J9JHF7, P60524, F1PYZ1
GO:0003774	motor activity	F	3	7	6.97674	1.01302	0.00702558	1	OVER	J9NU17, J9P5Z0, J9P992
GO:0006818	hydrogen transport	P	2	3	4.65116	0.434153	0.0113922	1	OVER	C4MW55, Q0QEN2
GO:0006119	oxidative phosphorylation	P	2	3	4.65116	0.434153	0.0113922	1	OVER	C4MW55, P00011
GO:0015992	proton transport	P	2	3	4.65116	0.434153	0.0113922	1	OVER	C4MW55, Q0QEN2
GO:0043234	protein complex	C	14	118	32.5581	17.0767	0.011689	1	OVER	C4MW55, P60529, J9NU17, J9JHF7, P60524, E2RL75, J9P4B4, F1Q0N9, F1PYZ1, J9P5Z0, E2R4H4, J9P992, E2QW34, Q0QEN2
GO:0015980	energy derivation by oxidation of organic compounds	P	3	9	6.97674	1.30246	0.0154047	1	OVER	C4MW55, F1PB77, P00011
GO:0032991	macromolecular complex	C	15	137	34.8837	19.8263	0.0185603	1	OVER	C4MW55, P60529, J9NU17, J9JHF7, P60524, E2RL75, J9P4B4, F1Q0N9, F1PYZ1, J9P5Z0, F1PJ74, E2R4H4, J9P992, E2QW34, Q0QEN2
GO:0015078	hydrogen ion transmembrane transporter activity	F	2	4	4.65116	0.578871	0.0218644	1	OVER	C4MW55, Q0QEN2
GO:1901363	heterocyclic compound binding	F	12	98	27.907	14.1823	0.0219424	1	OVER	P60529, J9NU17, J9JHF7, P60524, F1PYZ1, F1PB77, E2R5H4, F1P8V6, J9P992, P00011, F1PGC3, Q0QEN2
GO:0097159	organic cyclic compound binding	F	12	99	27.907	14.3271	0.0225564	1	OVER	P60529, J9NU17, J9JHF7, P60524, F1PYZ1, F1PB77, E2R5H4, F1P8V6, J9P992, P00011, F1PGC3, Q0QEN2
GO:0015077	monovalent inorganic cation transmembrane transporter activity	F	2	5	4.65116	0.723589	0.0349753	1	OVER	C4MW55, Q0QEN2
GO:0015672	monovalent inorganic cation transport	P	2	5	4.65116	0.723589	0.0349753	1	OVER	C4MW55, Q0QEN2
GO:0065007	biological regulation	P	12	297	27.907	42.9812	0.037957	1	UNDER	F6Y5M8, F1PDY8, J9NS29, F1P6H7, J9P8M2, J9P4B4, E2R5H4, E2RLF1, E2R7A3, F1PJ74, J9NVE9, E2R997
GO:0044763	single-organism cellular process	P	12	293	27.907	42.4023	0.0387175	1	UNDER	C4MW55, F1PDY8, F1P6H7, F1PB77, E2R5H4, E2RLF1, E2R7A3, F1PJ74, J9NVE9, E2R357, P00011, Q0QEN2
GO:0005515	protein binding	F	13	313	30.2326	45.2967	0.0388854	1	UNDER	F1P6H7, J9NU17, F1P8A6, J9P8M2, J9P4B4, E2R5H4, E2R7A3, F1PJ74, J9P9B9, J9P992, E2QYB2, F1PGC3, E2QUU8
GO:0015629	actin cytoskeleton	C	3	13	6.97674	1.88133	0.0438329	1	OVER	J9NU17, J9P5Z0, J9P992
GO:0050896	response to stimulus	P	8	221	18.6047	31.9826	0.0441819	1	UNDER	J9PB81, F1PDY8, J9P4B4, E2RLF1, E2R7A3, F1PJ74, J9NVE9, F1PGC3
GO:0006950	response to stress	P	1	83	2.32558	12.0116	0.0500722	1	UNDER	J9NVE9
GO:0045333	cellular respiration	P	2	6	4.65116	0.868307	0.0503625	1	OVER	C4MW55, P00011
GO:0044421	extracellular region part	C	6	186	13.9535	26.9175	0.0506237	1	UNDER	J9P8M2, J9P4B4, E2RLF1, F1PJ74, F1PIF2, J9PBN6
GO:0017111	nucleoside-triphosphatase activity	F	4	23	9.30233	3.32851	0.051773	1	OVER	J9NU17, J9P5Z0, J9P992, Q0QEN2
GO:0016818	hydrolase activity, acting on acid anhydrides, in phosphorus-containing anhydrides	F	4	24	9.30233	3.47323	0.0593035	1	OVER	J9NU17, J9P5Z0, J9P992, Q0QEN2
GO:0016817	hydrolase activity, acting on acid anhydrides	F	4	24	9.30233	3.47323	0.0593035	1	OVER	J9NU17, J9P5Z0, J9P992, Q0QEN2
GO:0016462	pyrophosphatase activity	F	4	24	9.30233	3.47323	0.0593035	1	OVER	J9NU17, J9P5Z0, J9P992, Q0QEN2
GO:0002161	aminoacyl-tRNA editing activity	F	1	1	2.32558	0.144718	0.0636095	1	OVER	F6Y5M8
GO:0006450	regulation of translational fidelity	P	1	1	2.32558	0.144718	0.0636095	1	OVER	F6Y5M8
GO:0006448	regulation of translational elongation	P	1	1	2.32558	0.144718	0.0636095	1	OVER	F6Y5M8
GO:0033138	positive regulation of peptidyl-serine phosphorylation	P	1	1	2.32558	0.144718	0.0636095	1	OVER	J9NVE9
GO:0033135	regulation of peptidyl-serine phosphorylation	P	1	1	2.32558	0.144718	0.0636095	1	OVER	J9NVE9
GO:0006414	translational elongation	P	1	1	2.32558	0.144718	0.0636095	1	OVER	F6Y5M8
GO:0032039	integrator complex	C	1	1	2.32558	0.144718	0.0636095	1	OVER	E2RL75
GO:0005903	brush border	C	1	1	2.32558	0.144718	0.0636095	1	OVER	J9NU17
GO:0005902	microvillus	C	1	1	2.32558	0.144718	0.0636095	1	OVER	J9NU17
GO:0016180	snRNA processing	P	1	1	2.32558	0.144718	0.0636095	1	OVER	E2RL75
GO:0015002	heme-copper terminal oxidase activity	F	1	1	2.32558	0.144718	0.0636095	1	OVER	C4MW55
GO:0004129	cytochrome-c oxidase activity	F	1	1	2.32558	0.144718	0.0636095	1	OVER	C4MW55
GO:0048232	male gamete generation	P	1	1	2.32558	0.144718	0.0636095	1	OVER	E2R357
GO:0016073	snRNA metabolic process	P	1	1	2.32558	0.144718	0.0636095	1	OVER	E2RL75
GO:0010739	positive regulation of protein kinase A signaling	P	1	1	2.32558	0.144718	0.0636095	1	OVER	J9NVE9
GO:0010738	regulation of protein kinase A signaling	P	1	1	2.32558	0.144718	0.0636095	1	OVER	J9NVE9
GO:0010737	protein kinase A signaling	P	1	1	2.32558	0.144718	0.0636095	1	OVER	J9NVE9
GO:0016676	oxidoreductase activity, acting on a heme group of donors, oxygen as acceptor	F	1	1	2.32558	0.144718	0.0636095	1	OVER	C4MW55
GO:0016675	oxidoreductase activity, acting on a heme group of donors	F	1	1	2.32558	0.144718	0.0636095	1	OVER	C4MW55
GO:0070069	cytochrome complex	C	1	1	2.32558	0.144718	0.0636095	1	OVER	C4MW55
GO:0007283	spermatogenesis	P	1	1	2.32558	0.144718	0.0636095	1	OVER	E2R357
GO:0030850	prostate gland development	P	1	1	2.32558	0.144718	0.0636095	1	OVER	E2RLF1
GO:0006123	mitochondrial electron transport, cytochrome c to oxygen	P	1	1	2.32558	0.144718	0.0636095	1	OVER	C4MW55
GO:0098803	respiratory chain complex	C	1	1	2.32558	0.144718	0.0636095	1	OVER	C4MW55
GO:0006665	sphingolipid metabolic process	P	1	1	2.32558	0.144718	0.0636095	1	OVER	E2RLF1
GO:0070469	respiratory chain	C	1	1	2.32558	0.144718	0.0636095	1	OVER	C4MW55
GO:0045277	respiratory chain complex IV	C	1	1	2.32558	0.144718	0.0636095	1	OVER	C4MW55
GO:0050807	regulation of synapse organization	P	1	1	2.32558	0.144718	0.0636095	1	OVER	F1PJ74
GO:0016323	basolateral plasma membrane	C	1	1	2.32558	0.144718	0.0636095	1	OVER	J9NU17
GO:0035457	cellular response to interferon-alpha	P	1	1	2.32558	0.144718	0.0636095	1	OVER	F1PGC3
GO:0035455	response to interferon-alpha	P	1	1	2.32558	0.144718	0.0636095	1	OVER	F1PGC3
GO:0044700	single organism signaling	P	2	96	4.65116	13.8929	0.0704185	1	UNDER	E2R7A3, J9NVE9
GO:0005615	extracellular space	C	2	96	4.65116	13.8929	0.0704185	1	UNDER	F1PJ74, J9PBN6
GO:0023052	signaling	P	2	98	4.65116	14.1823	0.0706782	1	UNDER	E2R7A3, J9NVE9
GO:0007154	cell communication	P	2	99	4.65116	14.3271	0.0711466	1	UNDER	E2R7A3, J9NVE9
GO:0050789	regulation of biological process	P	11	261	25.5814	37.7713	0.0761537	1	UNDER	F6Y5M8, F1PDY8, J9NS29, F1P6H7, J9P8M2, J9P4B4, E2R5H4, E2RLF1, E2R7A3, F1PJ74, J9NVE9
GO:0005829	cytosol	C	4	27	9.30233	3.90738	0.0852243	1	OVER	P60529, J9JHF7, P60524, F1PYZ1
GO:0044702	single organism reproductive process	P	2	8	4.65116	1.15774	0.0866818	1	OVER	E2RLF1, E2R357
GO:0005739	mitochondrion	C	2	8	4.65116	1.15774	0.0866818	1	OVER	P00011, Q0QEN2
GO:0019216	regulation of lipid metabolic process	P	2	8	4.65116	1.15774	0.0866818	1	OVER	F1PJ74, J9NVE9
GO:0022414	reproductive process	P	2	8	4.65116	1.15774	0.0866818	1	OVER	E2RLF1, E2R357
GO:0005488	binding	F	24	460	55.814	66.5702	0.0905157	1	UNDER	C4MW55, P60529, F1P6H7, J9NU17, J9JHF7, P60524, E2RL75, F1P8A6, J9P8M2, J9P4B4, J9NYN2, F1PYZ1, F1PB77, E2R5H4, F1P8V6, E2R7A3, F1PJ74, J9P9B9, J9P992, E2QYB2, P00011, F1PGC3, Q0QEN2, E2QUU8
GO:0009199	ribonucleoside triphosphate metabolic process	P	3	18	6.97674	2.60492	0.100182	1	OVER	C4MW55, P00011, Q0QEN2
GO:0009167	purine ribonucleoside monophosphate metabolic process	P	3	18	6.97674	2.60492	0.100182	1	OVER	C4MW55, P00011, Q0QEN2
GO:0009161	ribonucleoside monophosphate metabolic process	P	3	18	6.97674	2.60492	0.100182	1	OVER	C4MW55, P00011, Q0QEN2
GO:0009144	purine nucleoside triphosphate metabolic process	P	3	18	6.97674	2.60492	0.100182	1	OVER	C4MW55, P00011, Q0QEN2
GO:0009141	nucleoside triphosphate metabolic process	P	3	18	6.97674	2.60492	0.100182	1	OVER	C4MW55, P00011, Q0QEN2
GO:0009126	purine nucleoside monophosphate metabolic process	P	3	18	6.97674	2.60492	0.100182	1	OVER	C4MW55, P00011, Q0QEN2
GO:0009123	nucleoside monophosphate metabolic process	P	3	18	6.97674	2.60492	0.100182	1	OVER	C4MW55, P00011, Q0QEN2
GO:0009119	ribonucleoside metabolic process	P	3	18	6.97674	2.60492	0.100182	1	OVER	C4MW55, P00011, Q0QEN2
GO:0009116	nucleoside metabolic process	P	3	18	6.97674	2.60492	0.100182	1	OVER	C4MW55, P00011, Q0QEN2
GO:1901657	glycosyl compound metabolic process	P	3	18	6.97674	2.60492	0.100182	1	OVER	C4MW55, P00011, Q0QEN2
GO:0046128	purine ribonucleoside metabolic process	P	3	18	6.97674	2.60492	0.100182	1	OVER	C4MW55, P00011, Q0QEN2
GO:0046034	ATP metabolic process	P	3	18	6.97674	2.60492	0.100182	1	OVER	C4MW55, P00011, Q0QEN2
GO:0042278	purine nucleoside metabolic process	P	3	18	6.97674	2.60492	0.100182	1	OVER	C4MW55, P00011, Q0QEN2
GO:0009205	purine ribonucleoside triphosphate metabolic process	P	3	18	6.97674	2.60492	0.100182	1	OVER	C4MW55, P00011, Q0QEN2
GO:0007165	signal transduction	P	2	92	4.65116	13.314	0.104051	1	UNDER	E2R7A3, J9NVE9
GO:0005509	calcium ion binding	F	0	45	0	6.5123	0.104467	1	UNDER
GO:0009987	cellular process	P	20	400	46.5116	57.8871	0.107874	1	UNDER	C4MW55, F6Y5M8, F1PDY8, J9NS29, F1P6H7, E2RL75, J9P8M2, F1PB77, E2R5H4, E2RLF1, E2R7A3, F1PJ74, E2R4H4, J9NVE9, J9P992, E2R357, P00011, E2QW34, F1PGC3, Q0QEN2
GO:0006955	immune response	P	1	64	2.32558	9.26194	0.110868	1	UNDER	J9P4B4
GO:0046914	transition metal ion binding	F	6	48	13.9535	6.94645	0.113003	1	OVER	C4MW55, P60529, J9JHF7, P60524, J9NYN2, F1PYZ1
GO:0009150	purine ribonucleotide metabolic process	P	3	19	6.97674	2.74964	0.113844	1	OVER	C4MW55, P00011, Q0QEN2
GO:0006163	purine nucleotide metabolic process	P	3	19	6.97674	2.74964	0.113844	1	OVER	C4MW55, P00011, Q0QEN2
GO:0009259	ribonucleotide metabolic process	P	3	19	6.97674	2.74964	0.113844	1	OVER	C4MW55, P00011, Q0QEN2
GO:0044769	ATPase activity, coupled to transmembrane movement of ions, rotational mechanism	F	1	2	2.32558	0.289436	0.123261	1	OVER	Q0QEN2
GO:0046933	proton-transporting ATP synthase activity, rotational mechanism	F	1	2	2.32558	0.289436	0.123261	1	OVER	Q0QEN2
GO:0072522	purine-containing compound biosynthetic process	P	1	2	2.32558	0.289436	0.123261	1	OVER	Q0QEN2
GO:0009168	purine ribonucleoside monophosphate biosynthetic process	P	1	2	2.32558	0.289436	0.123261	1	OVER	Q0QEN2
GO:0009163	nucleoside biosynthetic process	P	1	2	2.32558	0.289436	0.123261	1	OVER	Q0QEN2
GO:0009156	ribonucleoside monophosphate biosynthetic process	P	1	2	2.32558	0.289436	0.123261	1	OVER	Q0QEN2
GO:0009152	purine ribonucleotide biosynthetic process	P	1	2	2.32558	0.289436	0.123261	1	OVER	Q0QEN2
GO:0009145	purine nucleoside triphosphate biosynthetic process	P	1	2	2.32558	0.289436	0.123261	1	OVER	Q0QEN2
GO:0009142	nucleoside triphosphate biosynthetic process	P	1	2	2.32558	0.289436	0.123261	1	OVER	Q0QEN2
GO:0070997	neuron death	P	1	2	2.32558	0.289436	0.123261	1	OVER	F1PJ74
GO:0001655	urogenital system development	P	1	2	2.32558	0.289436	0.123261	1	OVER	E2RLF1
GO:0009127	purine nucleoside monophosphate biosynthetic process	P	1	2	2.32558	0.289436	0.123261	1	OVER	Q0QEN2
GO:0009124	nucleoside monophosphate biosynthetic process	P	1	2	2.32558	0.289436	0.123261	1	OVER	Q0QEN2
GO:0033178	proton-transporting two-sector ATPase complex, catalytic domain	C	1	2	2.32558	0.289436	0.123261	1	OVER	Q0QEN2
GO:0034248	regulation of cellular amide metabolic process	P	1	2	2.32558	0.289436	0.123261	1	OVER	F6Y5M8
GO:0046890	regulation of lipid biosynthetic process	P	1	2	2.32558	0.289436	0.123261	1	OVER	F1PJ74
GO:0006417	regulation of translation	P	1	2	2.32558	0.289436	0.123261	1	OVER	F6Y5M8
GO:0042455	ribonucleoside biosynthetic process	P	1	2	2.32558	0.289436	0.123261	1	OVER	Q0QEN2
GO:0042451	purine nucleoside biosynthetic process	P	1	2	2.32558	0.289436	0.123261	1	OVER	Q0QEN2
GO:1901659	glycosyl compound biosynthetic process	P	1	2	2.32558	0.289436	0.123261	1	OVER	Q0QEN2
GO:0046129	purine ribonucleoside biosynthetic process	P	1	2	2.32558	0.289436	0.123261	1	OVER	Q0QEN2
GO:0009615	response to virus	P	1	2	2.32558	0.289436	0.123261	1	OVER	F1PGC3
GO:0061458	reproductive system development	P	1	2	2.32558	0.289436	0.123261	1	OVER	E2RLF1
GO:0051648	vesicle localization	P	1	2	2.32558	0.289436	0.123261	1	OVER	J9NU17
GO:0051640	organelle localization	P	1	2	2.32558	0.289436	0.123261	1	OVER	J9NU17
GO:0032504	multicellular organism reproduction	P	1	2	2.32558	0.289436	0.123261	1	OVER	E2R357
GO:1902600	hydrogen ion transmembrane transport	P	1	2	2.32558	0.289436	0.123261	1	OVER	Q0QEN2
GO:0018209	peptidyl-serine modification	P	1	2	2.32558	0.289436	0.123261	1	OVER	J9NVE9
GO:0004645	phosphorylase activity	F	1	2	2.32558	0.289436	0.123261	1	OVER	F1PB77
GO:0007276	gamete generation	P	1	2	2.32558	0.289436	0.123261	1	OVER	E2R357
GO:0018105	peptidyl-serine phosphorylation	P	1	2	2.32558	0.289436	0.123261	1	OVER	J9NVE9
GO:0031941	filamentous actin	C	1	2	2.32558	0.289436	0.123261	1	OVER	J9NU17
GO:0006164	purine nucleotide biosynthetic process	P	1	2	2.32558	0.289436	0.123261	1	OVER	Q0QEN2
GO:0016591	DNA-directed RNA polymerase II, holoenzyme	C	1	2	2.32558	0.289436	0.123261	1	OVER	E2RL75
GO:0006118	obsolete electron transport	P	1	2	2.32558	0.289436	0.123261	1	OVER	P00011
GO:0048732	gland development	P	1	2	2.32558	0.289436	0.123261	1	OVER	E2RLF1
GO:0006754	ATP biosynthetic process	P	1	2	2.32558	0.289436	0.123261	1	OVER	Q0QEN2
GO:0050996	positive regulation of lipid catabolic process	P	1	2	2.32558	0.289436	0.123261	1	OVER	J9NVE9
GO:0050994	regulation of lipid catabolic process	P	1	2	2.32558	0.289436	0.123261	1	OVER	J9NVE9
GO:0016469	proton-transporting two-sector ATPase complex	C	1	2	2.32558	0.289436	0.123261	1	OVER	Q0QEN2
GO:0048609	multicellular organismal reproductive process	P	1	2	2.32558	0.289436	0.123261	1	OVER	E2R357
GO:0048608	reproductive structure development	P	1	2	2.32558	0.289436	0.123261	1	OVER	E2RLF1
GO:0006643	membrane lipid metabolic process	P	1	2	2.32558	0.289436	0.123261	1	OVER	E2RLF1
GO:0015991	ATP hydrolysis coupled proton transport	P	1	2	2.32558	0.289436	0.123261	1	OVER	Q0QEN2
GO:0015988	energy coupled proton transmembrane transport, against electrochemical gradient	P	1	2	2.32558	0.289436	0.123261	1	OVER	Q0QEN2
GO:0015986	ATP synthesis coupled proton transport	P	1	2	2.32558	0.289436	0.123261	1	OVER	Q0QEN2
GO:0015985	energy coupled proton transport, down electrochemical gradient	P	1	2	2.32558	0.289436	0.123261	1	OVER	Q0QEN2
GO:0008184	glycogen phosphorylase activity	F	1	2	2.32558	0.289436	0.123261	1	OVER	F1PB77
GO:0009260	ribonucleotide biosynthetic process	P	1	2	2.32558	0.289436	0.123261	1	OVER	Q0QEN2
GO:1901214	regulation of neuron death	P	1	2	2.32558	0.289436	0.123261	1	OVER	F1PJ74
GO:0046390	ribose phosphate biosynthetic process	P	1	2	2.32558	0.289436	0.123261	1	OVER	Q0QEN2
GO:0009206	purine ribonucleoside triphosphate biosynthetic process	P	1	2	2.32558	0.289436	0.123261	1	OVER	Q0QEN2
GO:0009201	ribonucleoside triphosphate biosynthetic process	P	1	2	2.32558	0.289436	0.123261	1	OVER	Q0QEN2
GO:0050803	regulation of synapse structure or activity	P	1	2	2.32558	0.289436	0.123261	1	OVER	F1PJ74
GO:0045259	proton-transporting ATP synthase complex	C	1	2	2.32558	0.289436	0.123261	1	OVER	Q0QEN2
GO:0016328	lateral plasma membrane	C	1	2	2.32558	0.289436	0.123261	1	OVER	J9NU17
GO:0030554	adenyl nucleotide binding	F	4	31	9.30233	4.48625	0.127063	1	OVER	J9NU17, E2R5H4, J9P992, Q0QEN2
GO:0032559	adenyl ribonucleotide binding	F	4	31	9.30233	4.48625	0.127063	1	OVER	J9NU17, E2R5H4, J9P992, Q0QEN2
GO:0005524	ATP binding	F	4	31	9.30233	4.48625	0.127063	1	OVER	J9NU17, E2R5H4, J9P992, Q0QEN2
GO:0051704	multi-organism process	P	3	20	6.97674	2.89436	0.128185	1	OVER	J9PB81, E2R357, F1PGC3
GO:0005576	extracellular region	C	10	230	23.2558	33.2851	0.136814	1	UNDER	J9P8M2, J9P4B4, E2RLF1, F1PJ74, J9NVE9, F1PIF2, J9PBN6, F1PNY4, E2RKW4, E2QXH0
GO:0006629	lipid metabolic process	P	4	32	9.30233	4.63097	0.1387	1	OVER	E2RLF1, F1PJ74, J9NVE9, E2QXH0
GO:0016020	membrane	C	6	160	13.9535	23.1548	0.139955	1	UNDER	C4MW55, J9NU17, J9NZW6, F1P8A6, E2R7A3, Q0QEN2
GO:0044765	single-organism transport	P	8	80	18.6047	11.5774	0.148827	1	OVER	C4MW55, P60529, J9JHF7, P60524, F1PYZ1, F1P8V6, F1PJ74, Q0QEN2
GO:0022890	inorganic cation transmembrane transporter activity	F	2	11	4.65116	1.5919	0.150969	1	OVER	C4MW55, Q0QEN2
GO:0051707	response to other organism	P	2	11	4.65116	1.5919	0.150969	1	OVER	J9PB81, F1PGC3
GO:0009607	response to biotic stimulus	P	2	11	4.65116	1.5919	0.150969	1	OVER	J9PB81, F1PGC3
GO:0008324	cation transmembrane transporter activity	F	2	11	4.65116	1.5919	0.150969	1	OVER	C4MW55, Q0QEN2
GO:0043207	response to external biotic stimulus	P	2	11	4.65116	1.5919	0.150969	1	OVER	J9PB81, F1PGC3
GO:0044699	single-organism process	P	20	388	46.5116	56.1505	0.152591	1	UNDER	C4MW55, F1PDY8, P60529, F1P6H7, J9NU17, J9JHF7, P60524, J9P4B4, F1PYZ1, F1PB77, E2R5H4, E2RLF1, F1P8V6, E2R7A3, F1PJ74, J9NVE9, E2R357, P00011, Q0QEN2, E2QXH0
GO:0009653	anatomical structure morphogenesis	P	0	35	0	5.06512	0.15792	1	UNDER
GO:0019752	carboxylic acid metabolic process	P	0	35	0	5.06512	0.15792	1	UNDER
GO:0072521	purine-containing compound metabolic process	P	3	22	6.97674	3.18379	0.158673	1	OVER	C4MW55, P00011, Q0QEN2
GO:0016192	vesicle-mediated transport	P	0	37	0	5.35456	0.159765	1	UNDER
GO:0043436	oxoacid metabolic process	P	0	37	0	5.35456	0.159765	1	UNDER
GO:0006082	organic acid metabolic process	P	0	38	0	5.49928	0.161876	1	UNDER
GO:0044085	cellular component biogenesis	P	0	39	0	5.64399	0.164741	1	UNDER
GO:0070062	extracellular exosome	C	1	61	2.32558	8.82779	0.165015	1	UNDER	J9P4B4
GO:0065010	extracellular membrane-bounded organelle	C	1	61	2.32558	8.82779	0.165015	1	UNDER	J9P4B4
GO:0043230	extracellular organelle	C	1	61	2.32558	8.82779	0.165015	1	UNDER	J9P4B4
GO:0005634	nucleus	C	1	61	2.32558	8.82779	0.165015	1	UNDER	E2RL75
GO:1903561	extracellular vesicle	C	1	61	2.32558	8.82779	0.165015	1	UNDER	J9P4B4
GO:0052689	carboxylic ester hydrolase activity	F	2	12	4.65116	1.73661	0.174111	1	OVER	F6Y5M8, E2QXH0
GO:0006091	generation of precursor metabolites and energy	P	3	23	6.97674	3.32851	0.174708	1	OVER	C4MW55, F1PB77, P00011
GO:0044703	multi-organism reproductive process	P	1	3	2.32558	0.434153	0.179195	1	OVER	E2R357
GO:0009165	nucleotide biosynthetic process	P	1	3	2.32558	0.434153	0.179195	1	OVER	Q0QEN2
GO:0005977	glycogen metabolic process	P	1	3	2.32558	0.434153	0.179195	1	OVER	F1PB77
GO:0005938	cell cortex	C	1	3	2.32558	0.434153	0.179195	1	OVER	J9NU17
GO:0000428	DNA-directed RNA polymerase complex	C	1	3	2.32558	0.434153	0.179195	1	OVER	E2RL75
GO:0003006	developmental process involved in reproduction	P	1	3	2.32558	0.434153	0.179195	1	OVER	E2RLF1
GO:0005884	actin filament	C	1	3	2.32558	0.434153	0.179195	1	OVER	J9NU17
GO:0006953	acute-phase response	P	1	3	2.32558	0.434153	0.179195	1	OVER	J9NVE9
GO:0019953	sexual reproduction	P	1	3	2.32558	0.434153	0.179195	1	OVER	E2R357
GO:0044448	cell cortex part	C	1	3	2.32558	0.434153	0.179195	1	OVER	J9NU17
GO:0030880	RNA polymerase complex	C	1	3	2.32558	0.434153	0.179195	1	OVER	E2RL75
GO:0030864	cortical actin cytoskeleton	C	1	3	2.32558	0.434153	0.179195	1	OVER	J9NU17
GO:0030863	cortical cytoskeleton	C	1	3	2.32558	0.434153	0.179195	1	OVER	J9NU17
GO:0006112	energy reserve metabolic process	P	1	3	2.32558	0.434153	0.179195	1	OVER	F1PB77
GO:0008234	cysteine-type peptidase activity	F	1	3	2.32558	0.434153	0.179195	1	OVER	F1PIF2
GO:1901293	nucleoside phosphate biosynthetic process	P	1	3	2.32558	0.434153	0.179195	1	OVER	Q0QEN2
GO:0055029	nuclear DNA-directed RNA polymerase complex	C	1	3	2.32558	0.434153	0.179195	1	OVER	E2RL75
GO:0050808	synapse organization	P	1	3	2.32558	0.434153	0.179195	1	OVER	F1PJ74
GO:0044444	cytoplasmic part	C	9	96	20.9302	13.8929	0.181244	1	OVER	P60529, J9NU17, J9JHF7, P60524, F1PYZ1, E2RLF1, F1PIF2, P00011, Q0QEN2
GO:0019693	ribose phosphate metabolic process	P	3	24	6.97674	3.47323	0.191195	1	OVER	C4MW55, P00011, Q0QEN2
GO:0009892	negative regulation of metabolic process	P	3	24	6.97674	3.47323	0.191195	1	OVER	J9NS29, F1PJ74, J9NVE9
GO:0015075	ion transmembrane transporter activity	F	2	13	4.65116	1.88133	0.197798	1	OVER	C4MW55, Q0QEN2
GO:0009117	nucleotide metabolic process	P	3	25	6.97674	3.61795	0.208077	1	OVER	C4MW55, P00011, Q0QEN2
GO:0006753	nucleoside phosphate metabolic process	P	3	25	6.97674	3.61795	0.208077	1	OVER	C4MW55, P00011, Q0QEN2
GO:0032268	regulation of cellular protein metabolic process	P	3	25	6.97674	3.61795	0.208077	1	OVER	F6Y5M8, F1PJ74, J9NVE9
GO:0044707	single-multicellular organism process	P	4	117	9.30233	16.932	0.209732	1	UNDER	J9NU17, E2R5H4, E2RLF1, F1PJ74
GO:0065008	regulation of biological quality	P	2	80	4.65116	11.5774	0.217209	1	UNDER	F6Y5M8, F1PJ74
GO:0016787	hydrolase activity	F	11	124	25.5814	17.945	0.221226	1	OVER	F6Y5M8, J9PB81, J9NU17, J9P5Z0, E2R7A3, E2R4H4, J9P992, F1PIF2, E2QW34, Q0QEN2, E2QXH0
GO:0004298	threonine-type endopeptidase activity	F	2	14	4.65116	2.02605	0.221873	1	OVER	E2R4H4, E2QW34
GO:0022891	substrate-specific transmembrane transporter activity	F	2	14	4.65116	2.02605	0.221873	1	OVER	C4MW55, Q0QEN2
GO:0005839	proteasome core complex	C	2	14	4.65116	2.02605	0.221873	1	OVER	E2R4H4, E2QW34
GO:0070003	threonine-type peptidase activity	F	2	14	4.65116	2.02605	0.221873	1	OVER	E2R4H4, E2QW34
GO:1902578	single-organism localization	P	8	83	18.6047	12.0116	0.225036	1	OVER	C4MW55, P60529, J9JHF7, P60524, F1PYZ1, F1P8V6, F1PJ74, Q0QEN2
GO:0055086	nucleobase-containing small molecule metabolic process	P	3	26	6.97674	3.76266	0.225299	1	OVER	C4MW55, P00011, Q0QEN2
GO:0007605	sensory perception of sound	P	1	4	2.32558	0.578871	0.231639	1	OVER	J9NU17
GO:0070374	positive regulation of ERK1 and ERK2 cascade	P	1	4	2.32558	0.578871	0.231639	1	OVER	J9NVE9
GO:0070372	regulation of ERK1 and ERK2 cascade	P	1	4	2.32558	0.578871	0.231639	1	OVER	J9NVE9
GO:0044042	glucan metabolic process	P	1	4	2.32558	0.578871	0.231639	1	OVER	F1PB77
GO:0008610	lipid biosynthetic process	P	1	4	2.32558	0.578871	0.231639	1	OVER	F1PJ74
GO:0016820	hydrolase activity, acting on acid anhydrides, catalyzing transmembrane movement of substances	F	1	4	2.32558	0.578871	0.231639	1	OVER	Q0QEN2
GO:0005976	polysaccharide metabolic process	P	1	4	2.32558	0.578871	0.231639	1	OVER	F1PB77
GO:0090407	organophosphate biosynthetic process	P	1	4	2.32558	0.578871	0.231639	1	OVER	Q0QEN2
GO:0098590	plasma membrane region	C	1	4	2.32558	0.578871	0.231639	1	OVER	J9NU17
GO:0016125	sterol metabolic process	P	1	4	2.32558	0.578871	0.231639	1	OVER	F1PJ74
GO:0002526	acute inflammatory response	P	1	4	2.32558	0.578871	0.231639	1	OVER	J9NVE9
GO:1902652	secondary alcohol metabolic process	P	1	4	2.32558	0.578871	0.231639	1	OVER	F1PJ74
GO:0044429	mitochondrial part	C	1	4	2.32558	0.578871	0.231639	1	OVER	Q0QEN2
GO:0018193	peptidyl-amino acid modification	P	1	4	2.32558	0.578871	0.231639	1	OVER	J9NVE9
GO:0010608	posttranscriptional regulation of gene expression	P	1	4	2.32558	0.578871	0.231639	1	OVER	F6Y5M8
GO:0019829	cation-transporting ATPase activity	F	1	4	2.32558	0.578871	0.231639	1	OVER	Q0QEN2
GO:0015405	P-P-bond-hydrolysis-driven transmembrane transporter activity	F	1	4	2.32558	0.578871	0.231639	1	OVER	Q0QEN2
GO:0030170	pyridoxal phosphate binding	F	1	4	2.32558	0.578871	0.231639	1	OVER	F1PB77
GO:0006073	cellular glucan metabolic process	P	1	4	2.32558	0.578871	0.231639	1	OVER	F1PB77
GO:0050954	sensory perception of mechanical stimulus	P	1	4	2.32558	0.578871	0.231639	1	OVER	J9NU17
GO:0008203	cholesterol metabolic process	P	1	4	2.32558	0.578871	0.231639	1	OVER	F1PJ74
GO:0015399	primary active transmembrane transporter activity	F	1	4	2.32558	0.578871	0.231639	1	OVER	Q0QEN2
GO:0044264	cellular polysaccharide metabolic process	P	1	4	2.32558	0.578871	0.231639	1	OVER	F1PB77
GO:0000003	reproduction	P	1	4	2.32558	0.578871	0.231639	1	OVER	E2R357
GO:0042626	ATPase activity, coupled to transmembrane movement of substances	F	1	4	2.32558	0.578871	0.231639	1	OVER	Q0QEN2
GO:0042625	ATPase activity, coupled to transmembrane movement of ions	F	1	4	2.32558	0.578871	0.231639	1	OVER	Q0QEN2
GO:0048589	developmental growth	P	1	4	2.32558	0.578871	0.231639	1	OVER	E2RLF1
GO:0034369	plasma lipoprotein particle remodeling	P	1	4	2.32558	0.578871	0.231639	1	OVER	F1PJ74
GO:0034368	protein-lipid complex remodeling	P	1	4	2.32558	0.578871	0.231639	1	OVER	F1PJ74
GO:0034367	macromolecular complex remodeling	P	1	4	2.32558	0.578871	0.231639	1	OVER	F1PJ74
GO:0050794	regulation of cellular process	P	10	220	23.2558	31.8379	0.238516	1	UNDER	F6Y5M8, F1PDY8, J9NS29, F1P6H7, J9P8M2, E2R5H4, E2RLF1, E2R7A3, F1PJ74, J9NVE9
GO:0000502	proteasome complex	C	2	15	4.65116	2.17077	0.246193	1	OVER	E2R4H4, E2QW34
GO:1901566	organonitrogen compound biosynthetic process	P	2	15	4.65116	2.17077	0.246193	1	OVER	F6Y5M8, Q0QEN2
GO:0016301	kinase activity	F	2	15	4.65116	2.17077	0.246193	1	OVER	L7N0L9, E2R5H4
GO:0006897	endocytosis	P	0	28	0	4.0521	0.247631	1	UNDER
GO:0012505	endomembrane system	C	0	29	0	4.19682	0.247722	1	UNDER
GO:0022607	cellular component assembly	P	0	29	0	4.19682	0.247722	1	UNDER
GO:0009611	response to wounding	P	0	30	0	4.34153	0.248962	1	UNDER
GO:0022857	transmembrane transporter activity	F	2	16	4.65116	2.31548	0.270634	1	OVER	C4MW55, Q0QEN2
GO:0051603	proteolysis involved in cellular protein catabolic process	P	2	16	4.65116	2.31548	0.270634	1	OVER	E2R4H4, E2QW34
GO:0044257	cellular protein catabolic process	P	2	16	4.65116	2.31548	0.270634	1	OVER	E2R4H4, E2QW34
GO:0044430	cytoskeletal part	C	4	36	9.30233	5.20984	0.277144	1	OVER	J9NU17, F1Q0N9, J9P5Z0, J9P992
GO:0070371	ERK1 and ERK2 cascade	P	1	5	2.32558	0.723589	0.280805	1	OVER	J9NVE9
GO:0045834	positive regulation of lipid metabolic process	P	1	5	2.32558	0.723589	0.280805	1	OVER	J9NVE9
GO:0061695	transferase complex, transferring phosphorus-containing groups	C	1	5	2.32558	0.723589	0.280805	1	OVER	E2RL75
GO:0051129	negative regulation of cellular component organization	P	1	5	2.32558	0.723589	0.280805	1	OVER	F1PJ74
GO:0004869	cysteine-type endopeptidase inhibitor activity	F	1	5	2.32558	0.723589	0.280805	1	OVER	J9NS29
GO:0098589	membrane region	C	1	5	2.32558	0.723589	0.280805	1	OVER	J9NU17
GO:0043492	ATPase activity, coupled to movement of substances	F	1	5	2.32558	0.723589	0.280805	1	OVER	Q0QEN2
GO:0044451	nucleoplasm part	C	1	5	2.32558	0.723589	0.280805	1	OVER	E2RL75
GO:0008202	steroid metabolic process	P	1	5	2.32558	0.723589	0.280805	1	OVER	F1PJ74
GO:0034470	ncRNA processing	P	1	5	2.32558	0.723589	0.280805	1	OVER	E2RL75
GO:0005507	copper ion binding	F	1	5	2.32558	0.723589	0.280805	1	OVER	C4MW55
GO:0009896	positive regulation of catabolic process	P	1	5	2.32558	0.723589	0.280805	1	OVER	J9NVE9
GO:0016310	phosphorylation	P	4	37	9.30233	5.35456	0.284751	1	OVER	C4MW55, E2R5H4, J9NVE9, P00011
GO:0044265	cellular macromolecule catabolic process	P	2	17	4.65116	2.4602	0.295085	1	OVER	E2R4H4, E2QW34
GO:0031988	membrane-bounded vesicle	C	2	68	4.65116	9.84081	0.299322	1	UNDER	J9P4B4, E2QXH0
GO:0032555	purine ribonucleotide binding	F	4	39	9.30233	5.64399	0.301962	1	OVER	J9NU17, E2R5H4, J9P992, Q0QEN2
GO:0032550	purine ribonucleoside binding	F	4	39	9.30233	5.64399	0.301962	1	OVER	J9NU17, E2R5H4, J9P992, Q0QEN2
GO:0032549	ribonucleoside binding	F	4	39	9.30233	5.64399	0.301962	1	OVER	J9NU17, E2R5H4, J9P992, Q0QEN2
GO:0017076	purine nucleotide binding	F	4	39	9.30233	5.64399	0.301962	1	OVER	J9NU17, E2R5H4, J9P992, Q0QEN2
GO:0035639	purine ribonucleoside triphosphate binding	F	4	39	9.30233	5.64399	0.301962	1	OVER	J9NU17, E2R5H4, J9P992, Q0QEN2
GO:0001883	purine nucleoside binding	F	4	39	9.30233	5.64399	0.301962	1	OVER	J9NU17, E2R5H4, J9P992, Q0QEN2
GO:0001882	nucleoside binding	F	4	39	9.30233	5.64399	0.301962	1	OVER	J9NU17, E2R5H4, J9P992, Q0QEN2
GO:0031982	vesicle	C	2	73	4.65116	10.5644	0.304563	1	UNDER	J9P4B4, E2QXH0
GO:0032501	multicellular organismal process	P	5	126	11.6279	18.2344	0.310523	1	UNDER	J9NU17, E2R5H4, E2RLF1, F1PJ74, E2R357
GO:0051716	cellular response to stimulus	P	5	121	11.6279	17.5109	0.311362	1	UNDER	E2RLF1, E2R7A3, F1PJ74, J9NVE9, F1PGC3
GO:0002376	immune system process	P	5	121	11.6279	17.5109	0.311362	1	UNDER	J9PB81, J9P4B4, J9P9B9, E2QYB2, E2QUU8
GO:0032553	ribonucleotide binding	F	4	40	9.30233	5.78871	0.311461	1	OVER	J9NU17, E2R5H4, J9P992, Q0QEN2
GO:0016772	transferase activity, transferring phosphorus-containing groups	F	2	18	4.65116	2.60492	0.319448	1	OVER	L7N0L9, E2R5H4
GO:0006812	cation transport	P	2	18	4.65116	2.60492	0.319448	1	OVER	C4MW55, Q0QEN2
GO:0031324	negative regulation of cellular metabolic process	P	2	18	4.65116	2.60492	0.319448	1	OVER	J9NS29, J9NVE9
GO:0030163	protein catabolic process	P	2	18	4.65116	2.60492	0.319448	1	OVER	E2R4H4, E2QW34
GO:2000113	negative regulation of cellular macromolecule biosynthetic process	P	1	6	2.32558	0.868307	0.326894	1	OVER	J9NVE9
GO:0045892	negative regulation of transcription, DNA-templated	P	1	6	2.32558	0.868307	0.326894	1	OVER	J9NVE9
GO:0051253	negative regulation of RNA metabolic process	P	1	6	2.32558	0.868307	0.326894	1	OVER	J9NVE9
GO:0043604	amide biosynthetic process	P	1	6	2.32558	0.868307	0.326894	1	OVER	F6Y5M8
GO:0010975	regulation of neuron projection development	P	1	6	2.32558	0.868307	0.326894	1	OVER	F1PJ74
GO:0006412	translation	P	1	6	2.32558	0.868307	0.326894	1	OVER	F6Y5M8
GO:0051172	negative regulation of nitrogen compound metabolic process	P	1	6	2.32558	0.868307	0.326894	1	OVER	J9NVE9
GO:0022804	active transmembrane transporter activity	F	1	6	2.32558	0.868307	0.326894	1	OVER	Q0QEN2
GO:0045664	regulation of neuron differentiation	P	1	6	2.32558	0.868307	0.326894	1	OVER	F1PJ74
GO:0016758	transferase activity, transferring hexosyl groups	F	1	6	2.32558	0.868307	0.326894	1	OVER	F1PB77
GO:0016757	transferase activity, transferring glycosyl groups	F	1	6	2.32558	0.868307	0.326894	1	OVER	F1PB77
GO:0051015	actin filament binding	F	1	6	2.32558	0.868307	0.326894	1	OVER	J9P992
GO:0043410	positive regulation of MAPK cascade	P	1	6	2.32558	0.868307	0.326894	1	OVER	J9NVE9
GO:0043408	regulation of MAPK cascade	P	1	6	2.32558	0.868307	0.326894	1	OVER	J9NVE9
GO:1902679	negative regulation of RNA biosynthetic process	P	1	6	2.32558	0.868307	0.326894	1	OVER	J9NVE9
GO:0071827	plasma lipoprotein particle organization	P	1	6	2.32558	0.868307	0.326894	1	OVER	F1PJ74
GO:0071825	protein-lipid complex subunit organization	P	1	6	2.32558	0.868307	0.326894	1	OVER	F1PJ74
GO:1990234	transferase complex	C	1	6	2.32558	0.868307	0.326894	1	OVER	E2RL75
GO:1903507	negative regulation of nucleic acid-templated transcription	P	1	6	2.32558	0.868307	0.326894	1	OVER	J9NVE9
GO:0045934	negative regulation of nucleobase-containing compound metabolic process	P	1	6	2.32558	0.868307	0.326894	1	OVER	J9NVE9
GO:0055088	lipid homeostasis	P	1	6	2.32558	0.868307	0.326894	1	OVER	F1PJ74
GO:0009894	regulation of catabolic process	P	1	6	2.32558	0.868307	0.326894	1	OVER	J9NVE9
GO:0043043	peptide biosynthetic process	P	1	6	2.32558	0.868307	0.326894	1	OVER	F6Y5M8
GO:0005856	cytoskeleton	C	4	43	9.30233	6.22287	0.342947	1	OVER	J9NU17, F1Q0N9, J9P5Z0, J9P992
GO:0010605	negative regulation of macromolecule metabolic process	P	2	19	4.65116	2.74964	0.343636	1	OVER	J9NS29, J9NVE9
GO:0044255	cellular lipid metabolic process	P	2	19	4.65116	2.74964	0.343636	1	OVER	E2RLF1, J9NVE9
GO:0048583	regulation of response to stimulus	P	3	83	6.97674	12.0116	0.344029	1	UNDER	J9P4B4, F1PJ74, J9NVE9
GO:0002682	regulation of immune system process	P	1	48	2.32558	6.94645	0.352895	1	UNDER	J9P4B4
GO:0003676	nucleic acid binding	F	1	48	2.32558	6.94645	0.352895	1	UNDER	F1PGC3
GO:0005886	plasma membrane	C	1	50	2.32558	7.23589	0.358476	1	UNDER	J9NU17
GO:0006468	protein phosphorylation	P	2	20	4.65116	2.89436	0.367575	1	OVER	E2R5H4, J9NVE9
GO:0022892	substrate-specific transporter activity	F	2	20	4.65116	2.89436	0.367575	1	OVER	C4MW55, Q0QEN2
GO:0071345	cellular response to cytokine stimulus	P	1	7	2.32558	1.01302	0.370093	1	OVER	F1PGC3
GO:0000323	lytic vacuole	C	1	7	2.32558	1.01302	0.370093	1	OVER	E2RLF1
GO:0034097	response to cytokine	P	1	7	2.32558	1.01302	0.370093	1	OVER	F1PGC3
GO:0034660	ncRNA metabolic process	P	1	7	2.32558	1.01302	0.370093	1	OVER	E2RL75
GO:0005764	lysosome	C	1	7	2.32558	1.01302	0.370093	1	OVER	E2RLF1
GO:0031327	negative regulation of cellular biosynthetic process	P	1	7	2.32558	1.01302	0.370093	1	OVER	J9NVE9
GO:0032374	regulation of cholesterol transport	P	1	7	2.32558	1.01302	0.370093	1	OVER	F1PJ74
GO:0032371	regulation of sterol transport	P	1	7	2.32558	1.01302	0.370093	1	OVER	F1PJ74
GO:0010558	negative regulation of macromolecule biosynthetic process	P	1	7	2.32558	1.01302	0.370093	1	OVER	J9NVE9
GO:0044242	cellular lipid catabolic process	P	1	7	2.32558	1.01302	0.370093	1	OVER	J9NVE9
GO:0097006	regulation of plasma lipoprotein particle levels	P	1	7	2.32558	1.01302	0.370093	1	OVER	F1PJ74
GO:0009890	negative regulation of biosynthetic process	P	1	7	2.32558	1.01302	0.370093	1	OVER	J9NVE9
GO:0036094	small molecule binding	F	5	55	11.6279	7.95948	0.383067	1	OVER	J9NU17, F1PB77, E2R5H4, J9P992, Q0QEN2
GO:0006909	phagocytosis	P	0	22	0	3.18379	0.388683	1	UNDER
GO:0006732	coenzyme metabolic process	P	0	21	0	3.03907	0.389317	1	UNDER
GO:0044283	small molecule biosynthetic process	P	0	21	0	3.03907	0.389317	1	UNDER
GO:0008104	protein localization	P	0	21	0	3.03907	0.389317	1	UNDER
GO:0007596	blood coagulation	P	0	23	0	3.32851	0.389595	1	UNDER
GO:0051186	cofactor metabolic process	P	0	23	0	3.32851	0.389595	1	UNDER
GO:0040011	locomotion	P	0	23	0	3.32851	0.389595	1	UNDER
GO:0050817	coagulation	P	0	23	0	3.32851	0.389595	1	UNDER
GO:0007599	hemostasis	P	0	24	0	3.47323	0.391931	1	UNDER
GO:0006928	movement of cell or subcellular component	P	0	24	0	3.47323	0.391931	1	UNDER
GO:0005102	receptor binding	F	0	25	0	3.61795	0.395574	1	UNDER
GO:1902589	single-organism organelle organization	P	0	25	0	3.61795	0.395574	1	UNDER
GO:0042060	wound healing	P	0	25	0	3.61795	0.395574	1	UNDER
GO:0006796	phosphate-containing compound metabolic process	P	5	57	11.6279	8.24891	0.396503	1	OVER	C4MW55, E2R5H4, J9NVE9, P00011, Q0QEN2
GO:0043168	anion binding	F	5	57	11.6279	8.24891	0.396503	1	OVER	J9NU17, F1PB77, E2R5H4, J9P992, Q0QEN2
GO:0007166	cell surface receptor signaling pathway	P	0	26	0	3.76266	0.400412	1	UNDER
GO:0003824	catalytic activity	F	16	213	37.2093	30.8249	0.400971	1	OVER	C4MW55, F6Y5M8, J9PB81, J9NU17, L7N0L9, F1PB77, E2R5H4, J9P5Z0, E2R7A3, E2R4H4, J9P992, F1PIF2, E2R997, E2QW34, Q0QEN2, E2QXH0
GO:0070011	peptidase activity, acting on L-amino acid peptides	F	5	58	11.6279	8.39363	0.403869	1	OVER	J9PB81, E2R7A3, E2R4H4, F1PIF2, E2QW34
GO:0006793	phosphorus metabolic process	P	5	58	11.6279	8.39363	0.403869	1	OVER	C4MW55, E2R5H4, J9NVE9, P00011, Q0QEN2
GO:0050878	regulation of body fluid levels	P	0	27	0	3.90738	0.406337	1	UNDER
GO:0015850	organic hydroxy compound transport	P	1	8	2.32558	1.15774	0.41058	1	OVER	F1PJ74
GO:0050767	regulation of neurogenesis	P	1	8	2.32558	1.15774	0.41058	1	OVER	F1PJ74
GO:0098662	inorganic cation transmembrane transport	P	1	8	2.32558	1.15774	0.41058	1	OVER	Q0QEN2
GO:0098660	inorganic ion transmembrane transport	P	1	8	2.32558	1.15774	0.41058	1	OVER	Q0QEN2
GO:0098655	cation transmembrane transport	P	1	8	2.32558	1.15774	0.41058	1	OVER	Q0QEN2
GO:0006396	RNA processing	P	1	8	2.32558	1.15774	0.41058	1	OVER	E2RL75
GO:0030301	cholesterol transport	P	1	8	2.32558	1.15774	0.41058	1	OVER	F1PJ74
GO:1902533	positive regulation of intracellular signal transduction	P	1	8	2.32558	1.15774	0.41058	1	OVER	J9NVE9
GO:0001934	positive regulation of protein phosphorylation	P	1	8	2.32558	1.15774	0.41058	1	OVER	J9NVE9
GO:0023014	signal transduction by protein phosphorylation	P	1	8	2.32558	1.15774	0.41058	1	OVER	J9NVE9
GO:0000165	MAPK cascade	P	1	8	2.32558	1.15774	0.41058	1	OVER	J9NVE9
GO:0048037	cofactor binding	F	1	8	2.32558	1.15774	0.41058	1	OVER	F1PB77
GO:0015918	sterol transport	P	1	8	2.32558	1.15774	0.41058	1	OVER	F1PJ74
GO:0051960	regulation of nervous system development	P	1	8	2.32558	1.15774	0.41058	1	OVER	F1PJ74
GO:0051246	regulation of protein metabolic process	P	3	30	6.97674	4.34153	0.429637	1	OVER	F6Y5M8, F1PJ74, J9NVE9
GO:0005737	cytoplasm	C	11	137	25.5814	19.8263	0.431636	1	OVER	J9PB81, P60529, J9NU17, J9JHF7, P60524, F1PYZ1, E2RLF1, J9P5Z0, F1PIF2, P00011, Q0QEN2
GO:0007600	sensory perception	P	1	9	2.32558	1.30246	0.448522	1	OVER	J9NU17
GO:0034220	ion transmembrane transport	P	1	9	2.32558	1.30246	0.448522	1	OVER	Q0QEN2
GO:0003779	actin binding	F	1	9	2.32558	1.30246	0.448522	1	OVER	J9P992
GO:0042327	positive regulation of phosphorylation	P	1	9	2.32558	1.30246	0.448522	1	OVER	J9NVE9
GO:0005773	vacuole	C	1	9	2.32558	1.30246	0.448522	1	OVER	E2RLF1
GO:0004672	protein kinase activity	F	1	9	2.32558	1.30246	0.448522	1	OVER	E2R5H4
GO:0031344	regulation of cell projection organization	P	1	9	2.32558	1.30246	0.448522	1	OVER	F1PJ74
GO:0042157	lipoprotein metabolic process	P	1	9	2.32558	1.30246	0.448522	1	OVER	F1PJ74
GO:0032368	regulation of lipid transport	P	1	9	2.32558	1.30246	0.448522	1	OVER	F1PJ74
GO:0044262	cellular carbohydrate metabolic process	P	1	9	2.32558	1.30246	0.448522	1	OVER	F1PB77
GO:0042623	ATPase activity, coupled	F	1	9	2.32558	1.30246	0.448522	1	OVER	Q0QEN2
GO:0050877	neurological system process	P	1	9	2.32558	1.30246	0.448522	1	OVER	J9NU17
GO:0055114	oxidation-reduction process	P	3	32	6.97674	4.63097	0.448864	1	OVER	C4MW55, F1PB77, P00011
GO:0019637	organophosphate metabolic process	P	3	32	6.97674	4.63097	0.448864	1	OVER	C4MW55, P00011, Q0QEN2
GO:1901135	carbohydrate derivative metabolic process	P	3	35	6.97674	5.06512	0.48164	1	OVER	C4MW55, P00011, Q0QEN2
GO:0044248	cellular catabolic process	P	3	35	6.97674	5.06512	0.48164	1	OVER	E2R4H4, J9NVE9, E2QW34
GO:0006518	peptide metabolic process	P	1	10	2.32558	1.44718	0.484075	1	OVER	F6Y5M8
GO:1901137	carbohydrate derivative biosynthetic process	P	1	10	2.32558	1.44718	0.484075	1	OVER	Q0QEN2
GO:0060284	regulation of cell development	P	1	10	2.32558	1.44718	0.484075	1	OVER	F1PJ74
GO:0040007	growth	P	1	10	2.32558	1.44718	0.484075	1	OVER	E2RLF1
GO:0010629	negative regulation of gene expression	P	1	10	2.32558	1.44718	0.484075	1	OVER	J9NVE9
GO:0001932	regulation of protein phosphorylation	P	1	10	2.32558	1.44718	0.484075	1	OVER	J9NVE9
GO:0005044	scavenger receptor activity	F	1	10	2.32558	1.44718	0.484075	1	OVER	E2R7A3
GO:0010562	positive regulation of phosphorus metabolic process	P	1	10	2.32558	1.44718	0.484075	1	OVER	J9NVE9
GO:0045937	positive regulation of phosphate metabolic process	P	1	10	2.32558	1.44718	0.484075	1	OVER	J9NVE9
GO:0071840	cellular component organization or biogenesis	P	4	96	9.30233	13.8929	0.497006	1	UNDER	F1P6H7, F1PJ74, J9P992, E2R357
GO:0050776	regulation of immune response	P	1	37	2.32558	5.35456	0.503231	1	UNDER	J9P4B4
GO:0051239	regulation of multicellular organismal process	P	1	41	2.32558	5.93343	0.505822	1	UNDER	F1PJ74
GO:0006952	defense response	P	1	42	2.32558	6.07815	0.508339	1	UNDER	J9NVE9
GO:0006810	transport	P	8	102	18.6047	14.7612	0.508816	1	OVER	C4MW55, P60529, J9JHF7, P60524, F1PYZ1, F1P8V6, F1PJ74, Q0QEN2
GO:0002684	positive regulation of immune system process	P	1	43	2.32558	6.22287	0.511523	1	UNDER	J9P4B4
GO:0051234	establishment of localization	P	8	103	18.6047	14.9059	0.511868	1	OVER	C4MW55, P60529, J9JHF7, P60524, F1PYZ1, F1P8V6, F1PJ74, Q0QEN2
GO:0000166	nucleotide binding	F	4	44	9.30233	6.36758	0.515335	1	OVER	J9NU17, E2R5H4, J9P992, Q0QEN2
GO:1901265	nucleoside phosphate binding	F	4	44	9.30233	6.36758	0.515335	1	OVER	J9NU17, E2R5H4, J9P992, Q0QEN2
GO:0045111	intermediate filament cytoskeleton	C	1	11	2.32558	1.5919	0.517385	1	OVER	F1Q0N9
GO:0016887	ATPase activity	F	1	11	2.32558	1.5919	0.517385	1	OVER	Q0QEN2
GO:1901615	organic hydroxy compound metabolic process	P	1	11	2.32558	1.5919	0.517385	1	OVER	F1PJ74
GO:0005882	intermediate filament	C	1	11	2.32558	1.5919	0.517385	1	OVER	F1Q0N9
GO:0006956	complement activation	P	1	11	2.32558	1.5919	0.517385	1	OVER	J9P4B4
GO:0042325	regulation of phosphorylation	P	1	11	2.32558	1.5919	0.517385	1	OVER	J9NVE9
GO:0016042	lipid catabolic process	P	1	11	2.32558	1.5919	0.517385	1	OVER	J9NVE9
GO:0010647	positive regulation of cell communication	P	1	11	2.32558	1.5919	0.517385	1	OVER	J9NVE9
GO:0023056	positive regulation of signaling	P	1	11	2.32558	1.5919	0.517385	1	OVER	J9NVE9
GO:0032994	protein-lipid complex	C	1	11	2.32558	1.5919	0.517385	1	OVER	F1PJ74
GO:0006066	alcohol metabolic process	P	1	11	2.32558	1.5919	0.517385	1	OVER	F1PJ74
GO:0009967	positive regulation of signal transduction	P	1	11	2.32558	1.5919	0.517385	1	OVER	J9NVE9
GO:1990777	lipoprotein particle	C	1	11	2.32558	1.5919	0.517385	1	OVER	F1PJ74
GO:0034358	plasma lipoprotein particle	C	1	11	2.32558	1.5919	0.517385	1	OVER	F1PJ74
GO:0071704	organic substance metabolic process	P	19	265	44.186	38.3502	0.520462	1	OVER	C4MW55, F6Y5M8, J9PB81, J9NS29, F1P6H7, E2RL75, J9P4B4, F1PB77, E2R5H4, E2RLF1, E2R7A3, F1PJ74, E2R4H4, J9NVE9, F1PIF2, P00011, E2QW34, Q0QEN2, E2QXH0
GO:0004175	endopeptidase activity	F	4	49	9.30233	7.09117	0.5424	1	OVER	J9PB81, E2R7A3, E2R4H4, E2QW34
GO:0043603	cellular amide metabolic process	P	1	12	2.32558	1.73661	0.548592	1	OVER	F6Y5M8
GO:0038024	cargo receptor activity	F	1	12	2.32558	1.73661	0.548592	1	OVER	E2R7A3
GO:0006954	inflammatory response	P	1	12	2.32558	1.73661	0.548592	1	OVER	J9NVE9
GO:0042995	cell projection	C	1	12	2.32558	1.73661	0.548592	1	OVER	J9NU17
GO:0031401	positive regulation of protein modification process	P	1	12	2.32558	1.73661	0.548592	1	OVER	J9NVE9
GO:1902531	regulation of intracellular signal transduction	P	1	12	2.32558	1.73661	0.548592	1	OVER	J9NVE9
GO:0048666	neuron development	P	1	12	2.32558	1.73661	0.548592	1	OVER	F1PJ74
GO:0031175	neuron projection development	P	1	12	2.32558	1.73661	0.548592	1	OVER	F1PJ74
GO:0097367	carbohydrate derivative binding	F	4	51	9.30233	7.38061	0.556247	1	OVER	J9NU17, E2R5H4, J9P992, Q0QEN2
GO:1901575	organic substance catabolic process	P	4	52	9.30233	7.52533	0.563672	1	OVER	F1PJ74, E2R4H4, J9NVE9, E2QW34
GO:0010941	regulation of cell death	P	1	13	2.32558	1.88133	0.577824	1	OVER	F1PJ74
GO:0072376	protein activation cascade	P	1	13	2.32558	1.88133	0.577824	1	OVER	J9P4B4
GO:0019220	regulation of phosphate metabolic process	P	1	13	2.32558	1.88133	0.577824	1	OVER	J9NVE9
GO:0030182	neuron differentiation	P	1	13	2.32558	1.88133	0.577824	1	OVER	F1PJ74
GO:1902494	catalytic complex	C	1	13	2.32558	1.88133	0.577824	1	OVER	E2RL75
GO:0098805	whole membrane	C	1	13	2.32558	1.88133	0.577824	1	OVER	J9NU17
GO:0008233	peptidase activity	F	5	61	11.6279	8.82779	0.578108	1	OVER	J9PB81, E2R7A3, E2R4H4, F1PIF2, E2QW34
GO:1901564	organonitrogen compound metabolic process	P	5	65	11.6279	9.40666	0.594004	1	OVER	C4MW55, F6Y5M8, E2RLF1, P00011, Q0QEN2
GO:0048522	positive regulation of cellular process	P	5	66	11.6279	9.55137	0.598813	1	OVER	F1P6H7, J9P8M2, E2R5H4, F1PJ74, J9NVE9
GO:0043227	membrane-bounded organelle	C	10	190	23.2558	27.4964	0.599105	1	UNDER	J9PB81, E2RL75, J9P4B4, J9NYN2, E2RLF1, F1PJ74, F1PIF2, P00011, Q0QEN2, E2QXH0
GO:0043170	macromolecule metabolic process	P	14	193	32.5581	27.9305	0.60091	1	OVER	F6Y5M8, J9PB81, J9NS29, F1P6H7, E2RL75, J9P4B4, F1PB77, E2R5H4, E2R7A3, F1PJ74, E2R4H4, J9NVE9, F1PIF2, E2QW34
GO:0051241	negative regulation of multicellular organismal process	P	1	14	2.32558	2.02605	0.605205	1	OVER	F1PJ74
GO:0051174	regulation of phosphorus metabolic process	P	1	14	2.32558	2.02605	0.605205	1	OVER	J9NVE9
GO:0051130	positive regulation of cellular component organization	P	1	14	2.32558	2.02605	0.605205	1	OVER	F1PJ74
GO:0016773	phosphotransferase activity, alcohol group as acceptor	F	1	14	2.32558	2.02605	0.605205	1	OVER	E2R5H4
GO:0045595	regulation of cell differentiation	P	1	14	2.32558	2.02605	0.605205	1	OVER	F1PJ74
GO:0006869	lipid transport	P	1	14	2.32558	2.02605	0.605205	1	OVER	F1PJ74
GO:0031399	regulation of protein modification process	P	1	14	2.32558	2.02605	0.605205	1	OVER	J9NVE9
GO:0055085	transmembrane transport	P	1	14	2.32558	2.02605	0.605205	1	OVER	Q0QEN2
GO:0048519	negative regulation of biological process	P	3	70	6.97674	10.1302	0.608412	1	UNDER	J9NS29, F1PJ74, J9NVE9
GO:0005887	integral component of plasma membrane	C	0	15	0	2.17077	0.615344	1	UNDER
GO:0022603	regulation of anatomical structure morphogenesis	P	0	15	0	2.17077	0.615344	1	UNDER
GO:0032989	cellular component morphogenesis	P	0	15	0	2.17077	0.615344	1	UNDER
GO:0004871	signal transducer activity	F	0	16	0	2.31548	0.61577	1	UNDER
GO:0019318	hexose metabolic process	P	0	16	0	2.31548	0.61577	1	UNDER
GO:0065003	macromolecular complex assembly	P	0	16	0	2.31548	0.61577	1	UNDER
GO:0031226	intrinsic component of plasma membrane	C	0	16	0	2.31548	0.61577	1	UNDER
GO:0008283	cell proliferation	P	0	16	0	2.31548	0.61577	1	UNDER
GO:0006090	pyruvate metabolic process	P	0	16	0	2.31548	0.61577	1	UNDER
GO:0019725	cellular homeostasis	P	0	16	0	2.31548	0.61577	1	UNDER
GO:0007010	cytoskeleton organization	P	0	16	0	2.31548	0.61577	1	UNDER
GO:0046364	monosaccharide biosynthetic process	P	0	16	0	2.31548	0.61577	1	UNDER
GO:0044267	cellular protein metabolic process	P	6	77	13.9535	11.1433	0.617443	1	OVER	F6Y5M8, E2R5H4, F1PJ74, E2R4H4, J9NVE9, E2QW34
GO:0032101	regulation of response to external stimulus	P	0	17	0	2.4602	0.617735	1	UNDER
GO:0051649	establishment of localization in cell	P	0	17	0	2.4602	0.617735	1	UNDER
GO:1903034	regulation of response to wounding	P	0	17	0	2.4602	0.617735	1	UNDER
GO:0098797	plasma membrane protein complex	C	0	17	0	2.4602	0.617735	1	UNDER
GO:0051240	positive regulation of multicellular organismal process	P	0	18	0	2.60492	0.621045	1	UNDER
GO:0005996	monosaccharide metabolic process	P	0	18	0	2.60492	0.621045	1	UNDER
GO:1901605	alpha-amino acid metabolic process	P	0	18	0	2.60492	0.621045	1	UNDER
GO:0003677	DNA binding	F	0	18	0	2.60492	0.621045	1	UNDER
GO:0071822	protein complex subunit organization	P	0	18	0	2.60492	0.621045	1	UNDER
GO:0016051	carbohydrate biosynthetic process	P	0	18	0	2.60492	0.621045	1	UNDER
GO:0044424	intracellular part	C	17	242	39.5349	35.0217	0.623672	1	OVER	C4MW55, J9PB81, P60529, J9NU17, J9JHF7, P60524, E2RL75, F1Q0N9, F1PYZ1, E2RLF1, J9P5Z0, E2R4H4, J9P992, F1PIF2, P00011, E2QW34, Q0QEN2
GO:0044238	primary metabolic process	P	17	242	39.5349	35.0217	0.623672	1	OVER	C4MW55, F6Y5M8, J9PB81, E2RL75, J9P4B4, F1PB77, E2R5H4, E2RLF1, E2R7A3, F1PJ74, E2R4H4, J9NVE9, F1PIF2, P00011, E2QW34, Q0QEN2, E2QXH0
GO:0080134	regulation of response to stress	P	0	19	0	2.74964	0.625524	1	UNDER
GO:0051674	localization of cell	P	0	19	0	2.74964	0.625524	1	UNDER
GO:0048870	cell motility	P	0	19	0	2.74964	0.625524	1	UNDER
GO:0046496	nicotinamide nucleotide metabolic process	P	0	19	0	2.74964	0.625524	1	UNDER
GO:0016477	cell migration	P	0	19	0	2.74964	0.625524	1	UNDER
GO:0006520	cellular amino acid metabolic process	P	0	20	0	2.89436	0.631014	1	UNDER
GO:0072524	pyridine-containing compound metabolic process	P	0	20	0	2.89436	0.631014	1	UNDER
GO:0032787	monocarboxylic acid metabolic process	P	0	20	0	2.89436	0.631014	1	UNDER
GO:0019362	pyridine nucleotide metabolic process	P	0	20	0	2.89436	0.631014	1	UNDER
GO:0006733	oxidoreduction coenzyme metabolic process	P	0	20	0	2.89436	0.631014	1	UNDER
GO:0008152	metabolic process	P	20	286	46.5116	41.3893	0.633016	1	OVER	C4MW55, F6Y5M8, J9PB81, J9NS29, F1P6H7, E2RL75, J9P4B4, F1PB77, E2R5H4, E2RLF1, E2R7A3, F1PJ74, E2R4H4, J9NVE9, F1PIF2, E2R997, P00011, E2QW34, Q0QEN2, E2QXH0
GO:0009057	macromolecule catabolic process	P	2	21	4.65116	3.03907	0.63737	1	OVER	E2R4H4, E2QW34
GO:0098796	membrane protein complex	C	2	21	4.65116	3.03907	0.63737	1	OVER	C4MW55, Q0QEN2
GO:0032502	developmental process	P	4	86	9.30233	12.4457	0.63849	1	UNDER	F1P6H7, E2R5H4, E2RLF1, F1PJ74
GO:0044767	single-organism developmental process	P	4	85	9.30233	12.301	0.638585	1	UNDER	F1P6H7, E2R5H4, E2RLF1, F1PJ74
GO:0016043	cellular component organization	P	4	88	9.30233	12.7352	0.639213	1	UNDER	F1P6H7, F1PJ74, J9P992, E2R357
GO:0006811	ion transport	P	2	22	4.65116	3.18379	0.644462	1	OVER	C4MW55, Q0QEN2
GO:0004866	endopeptidase inhibitor activity	F	2	24	4.65116	3.47323	0.660393	1	OVER	J9NS29, J9PBN6
GO:0016788	hydrolase activity, acting on ester bonds	F	2	24	4.65116	3.47323	0.660393	1	OVER	F6Y5M8, E2QXH0
GO:0061135	endopeptidase regulator activity	F	2	24	4.65116	3.47323	0.660393	1	OVER	J9NS29, J9PBN6
GO:0030414	peptidase inhibitor activity	F	2	25	4.65116	3.61795	0.669031	1	OVER	J9NS29, J9PBN6
GO:0043231	intracellular membrane-bounded organelle	C	6	115	13.9535	16.6425	0.679579	1	UNDER	J9PB81, E2RL75, E2RLF1, F1PIF2, P00011, Q0QEN2
GO:0004857	enzyme inhibitor activity	F	2	27	4.65116	3.90738	0.687221	1	OVER	J9NS29, J9PBN6
GO:0005215	transporter activity	F	2	27	4.65116	3.90738	0.687221	1	OVER	C4MW55, Q0QEN2
GO:0061134	peptidase regulator activity	F	2	27	4.65116	3.90738	0.687221	1	OVER	J9NS29, J9PBN6
GO:0051179	localization	P	9	129	20.9302	18.6686	0.692405	1	OVER	C4MW55, P60529, J9NU17, J9JHF7, P60524, F1PYZ1, F1P8V6, F1PJ74, Q0QEN2
GO:0004252	serine-type endopeptidase activity	F	2	28	4.65116	4.0521	0.696628	1	OVER	J9PB81, E2R7A3
GO:0017171	serine hydrolase activity	F	2	28	4.65116	4.0521	0.696628	1	OVER	J9PB81, E2R7A3
GO:0031325	positive regulation of cellular metabolic process	P	2	28	4.65116	4.0521	0.696628	1	OVER	F1PJ74, J9NVE9
GO:0008236	serine-type peptidase activity	F	2	28	4.65116	4.0521	0.696628	1	OVER	J9PB81, E2R7A3
GO:0019538	protein metabolic process	P	10	141	23.2558	20.4052	0.698723	1	OVER	F6Y5M8, J9PB81, J9P4B4, E2R5H4, E2R7A3, F1PJ74, E2R4H4, J9NVE9, F1PIF2, E2QW34
GO:0006351	transcription, DNA-templated	P	1	31	2.32558	4.48625	0.713558	1	UNDER	J9NVE9
GO:0031981	nuclear lumen	C	1	31	2.32558	4.48625	0.713558	1	UNDER	E2RL75
GO:0071702	organic substance transport	P	1	31	2.32558	4.48625	0.713558	1	UNDER	F1PJ74
GO:0060089	molecular transducer activity	F	1	31	2.32558	4.48625	0.713558	1	UNDER	E2R7A3
GO:0097659	nucleic acid-templated transcription	P	1	31	2.32558	4.48625	0.713558	1	UNDER	J9NVE9
GO:0042592	homeostatic process	P	1	30	2.32558	4.34153	0.713879	1	UNDER	F1PJ74
GO:0051252	regulation of RNA metabolic process	P	1	30	2.32558	4.34153	0.713879	1	UNDER	J9NVE9
GO:0044459	plasma membrane part	C	1	30	2.32558	4.34153	0.713879	1	UNDER	J9NU17
GO:0022610	biological adhesion	P	1	30	2.32558	4.34153	0.713879	1	UNDER	F1P6H7
GO:0008270	zinc ion binding	F	1	30	2.32558	4.34153	0.713879	1	UNDER	J9NYN2
GO:0007155	cell adhesion	P	1	30	2.32558	4.34153	0.713879	1	UNDER	F1P6H7
GO:0032879	regulation of localization	P	1	30	2.32558	4.34153	0.713879	1	UNDER	F1PJ74
GO:0032774	RNA biosynthetic process	P	1	32	2.32558	4.63097	0.713884	1	UNDER	J9NVE9
GO:0019219	regulation of nucleobase-containing compound metabolic process	P	1	32	2.32558	4.63097	0.713884	1	UNDER	J9NVE9
GO:0044428	nuclear part	C	1	33	2.32558	4.77569	0.714815	1	UNDER	E2RL75
GO:0030154	cell differentiation	P	1	33	2.32558	4.77569	0.714815	1	UNDER	F1PJ74
GO:0005975	carbohydrate metabolic process	P	1	34	2.32558	4.92041	0.716312	1	UNDER	F1PB77
GO:0002253	activation of immune response	P	1	34	2.32558	4.92041	0.716312	1	UNDER	J9P4B4
GO:0044712	single-organism catabolic process	P	1	35	2.32558	5.06512	0.718334	1	UNDER	J9NVE9
GO:0050778	positive regulation of immune response	P	1	35	2.32558	5.06512	0.718334	1	UNDER	J9P4B4
GO:0033036	macromolecule localization	P	1	36	2.32558	5.20984	0.720842	1	UNDER	F1PJ74
GO:0048869	cellular developmental process	P	1	36	2.32558	5.20984	0.720842	1	UNDER	F1PJ74
GO:0070013	intracellular organelle lumen	C	1	36	2.32558	5.20984	0.720842	1	UNDER	E2RL75
GO:0031974	membrane-enclosed lumen	C	1	36	2.32558	5.20984	0.720842	1	UNDER	E2RL75
GO:0043233	organelle lumen	C	1	36	2.32558	5.20984	0.720842	1	UNDER	E2RL75
GO:0016740	transferase activity	F	3	39	6.97674	5.64399	0.73089	1	OVER	L7N0L9, F1PB77, E2R5H4
GO:0009889	regulation of biosynthetic process	P	3	39	6.97674	5.64399	0.73089	1	OVER	F6Y5M8, F1PJ74, J9NVE9
GO:0043226	organelle	C	14	242	32.5581	35.0217	0.743315	1	UNDER	J9PB81, J9NU17, E2RL75, J9P4B4, J9NYN2, F1Q0N9, E2RLF1, J9P5Z0, F1PJ74, J9P992, F1PIF2, P00011, Q0QEN2, E2QXH0
GO:0005622	intracellular	C	17	250	39.5349	36.1795	0.745474	1	OVER	C4MW55, J9PB81, P60529, J9NU17, J9JHF7, P60524, E2RL75, F1Q0N9, F1PYZ1, E2RLF1, J9P5Z0, E2R4H4, J9P992, F1PIF2, P00011, E2QW34, Q0QEN2
GO:0044271	cellular nitrogen compound biosynthetic process	P	3	43	6.97674	6.22287	0.748844	1	OVER	F6Y5M8, J9NVE9, Q0QEN2
GO:0043412	macromolecule modification	P	2	46	4.65116	6.65702	0.760078	1	UNDER	E2R5H4, J9NVE9
GO:0016021	integral component of membrane	C	2	49	4.65116	7.09117	0.760902	1	UNDER	C4MW55, J9NZW6
GO:0034645	cellular macromolecule biosynthetic process	P	2	49	4.65116	7.09117	0.760902	1	UNDER	F6Y5M8, J9NVE9
GO:0031224	intrinsic component of membrane	C	2	51	4.65116	7.38061	0.763151	1	UNDER	C4MW55, J9NZW6
GO:0009059	macromolecule biosynthetic process	P	2	52	4.65116	7.52533	0.764737	1	UNDER	F6Y5M8, J9NVE9
GO:0071944	cell periphery	C	2	52	4.65116	7.52533	0.764737	1	UNDER	J9NU17, F1Q0N9
GO:0048584	positive regulation of response to stimulus	P	2	52	4.65116	7.52533	0.764737	1	UNDER	J9P4B4, J9NVE9
GO:0009056	catabolic process	P	4	60	9.30233	8.68307	0.786242	1	OVER	F1PJ74, E2R4H4, J9NVE9, E2QW34
GO:0007275	multicellular organismal development	P	3	65	6.97674	9.40666	0.788827	1	UNDER	E2R5H4, E2RLF1, F1PJ74
GO:0044249	cellular biosynthetic process	P	3	66	6.97674	9.55137	0.789552	1	UNDER	F6Y5M8, J9NVE9, Q0QEN2
GO:0060255	regulation of macromolecule metabolic process	P	5	68	11.6279	9.84081	0.79166	1	OVER	F6Y5M8, J9NS29, F1P6H7, F1PJ74, J9NVE9
GO:0006139	nucleobase-containing compound metabolic process	P	5	69	11.6279	9.98553	0.793026	1	OVER	C4MW55, E2RL75, J9NVE9, P00011, Q0QEN2
GO:0006508	proteolysis	P	5	71	11.6279	10.275	0.796331	1	OVER	J9PB81, E2R7A3, E2R4H4, F1PIF2, E2QW34
GO:1901576	organic substance biosynthetic process	P	4	79	9.30233	11.4327	0.807216	1	UNDER	F6Y5M8, F1PJ74, J9NVE9, Q0QEN2
GO:0044425	membrane part	C	4	79	9.30233	11.4327	0.807216	1	UNDER	C4MW55, J9NU17, J9NZW6, Q0QEN2
GO:0046483	heterocycle metabolic process	P	5	76	11.6279	10.9986	0.807493	1	OVER	C4MW55, E2RL75, J9NVE9, P00011, Q0QEN2
GO:0034641	cellular nitrogen compound metabolic process	P	6	85	13.9535	12.301	0.811228	1	OVER	C4MW55, F6Y5M8, E2RL75, J9NVE9, P00011, Q0QEN2
GO:1901360	organic cyclic compound metabolic process	P	6	85	13.9535	12.301	0.811228	1	OVER	C4MW55, E2RL75, F1PJ74, J9NVE9, P00011, Q0QEN2
GO:0019222	regulation of metabolic process	P	6	88	13.9535	12.7352	0.815362	1	OVER	F6Y5M8, J9NS29, F1P6H7, E2RLF1, F1PJ74, J9NVE9
GO:0046872	metal ion binding	F	6	109	13.9535	15.7742	0.83181	1	UNDER	C4MW55, P60529, J9JHF7, P60524, J9NYN2, F1PYZ1
GO:0043169	cation binding	F	6	112	13.9535	16.2084	0.8321	1	UNDER	C4MW55, P60529, J9JHF7, P60524, J9NYN2, F1PYZ1
GO:0044260	cellular macromolecule metabolic process	P	8	121	18.6047	17.5109	0.839084	1	OVER	F6Y5M8, E2RL75, F1PB77, E2R5H4, F1PJ74, E2R4H4, J9NVE9, E2QW34
GO:0048518	positive regulation of biological process	P	7	123	16.2791	17.8003	0.840506	1	UNDER	F1PDY8, F1P6H7, J9P8M2, J9P4B4, E2R5H4, F1PJ74, J9NVE9
GO:0044710	single-organism metabolic process	P	9	136	20.9302	19.6816	0.845723	1	OVER	C4MW55, J9P4B4, F1PB77, E2RLF1, F1PJ74, J9NVE9, P00011, Q0QEN2, E2QXH0
GO:0043167	ion binding	F	11	162	25.5814	23.4443	0.853545	1	OVER	C4MW55, P60529, J9NU17, J9JHF7, P60524, J9NYN2, F1PYZ1, F1PB77, E2R5H4, J9P992, Q0QEN2
GO:0044237	cellular metabolic process	P	13	195	30.2326	28.22	0.862376	1	OVER	C4MW55, F6Y5M8, J9NS29, E2RL75, F1PB77, E2R5H4, E2RLF1, F1PJ74, E2R4H4, J9NVE9, P00011, E2QW34, Q0QEN2
GO:0043232	intracellular non-membrane-bounded organelle	C	4	62	9.30233	8.9725	1	1	OVER	J9NU17, F1Q0N9, J9P5Z0, J9P992
GO:0043228	non-membrane-bounded organelle	C	4	62	9.30233	8.9725	1	1	OVER	J9NU17, F1Q0N9, J9P5Z0, J9P992
GO:0009058	biosynthetic process	P	5	84	11.6279	12.1563	1	1	UNDER	F6Y5M8, F1PJ74, J9NVE9, E2R997, Q0QEN2
GO:0006807	nitrogen compound metabolic process	P	7	111	16.2791	16.0637	1	1	UNDER	C4MW55, F6Y5M8, E2RL75, E2RLF1, J9NVE9, P00011, Q0QEN2
GO:0044281	small molecule metabolic process	P	4	63	9.30233	9.11722	1	1	UNDER	C4MW55, F1PJ74, P00011, Q0QEN2
GO:0031323	regulation of cellular metabolic process	P	4	68	9.30233	9.84081	1	1	UNDER	F6Y5M8, J9NS29, F1PJ74, J9NVE9
GO:0051171	regulation of nitrogen compound metabolic process	P	2	37	4.65116	5.35456	1	1	UNDER	F6Y5M8, J9NVE9
GO:0019438	aromatic compound biosynthetic process	P	2	37	4.65116	5.35456	1	1	UNDER	J9NVE9, Q0QEN2
GO:0009605	response to external stimulus	P	2	37	4.65116	5.35456	1	1	UNDER	J9PB81, F1PGC3
GO:0006996	organelle organization	P	2	37	4.65116	5.35456	1	1	UNDER	J9P992, E2R357
GO:0031326	regulation of cellular biosynthetic process	P	2	37	4.65116	5.35456	1	1	UNDER	F6Y5M8, J9NVE9
GO:0018130	heterocycle biosynthetic process	P	2	37	4.65116	5.35456	1	1	UNDER	J9NVE9, Q0QEN2
GO:1901362	organic cyclic compound biosynthetic process	P	2	37	4.65116	5.35456	1	1	UNDER	J9NVE9, Q0QEN2
GO:0010468	regulation of gene expression	P	2	38	4.65116	5.49928	1	1	UNDER	F6Y5M8, J9NVE9
GO:0044723	single-organism carbohydrate metabolic process	P	1	26	2.32558	3.76266	1	1	UNDER	F1PB77
GO:0010604	positive regulation of macromolecule metabolic process	P	1	26	2.32558	3.76266	1	1	UNDER	J9NVE9
GO:0048513	organ development	P	1	26	2.32558	3.76266	1	1	UNDER	E2RLF1
GO:0010467	gene expression	P	3	53	6.97674	7.67004	1	1	UNDER	F6Y5M8, E2RL75, J9NVE9
GO:0048523	negative regulation of cellular process	P	3	53	6.97674	7.67004	1	1	UNDER	J9NS29, F1PJ74, J9NVE9
GO:0080090	regulation of primary metabolic process	P	4	71	9.30233	10.275	1	1	UNDER	F6Y5M8, E2RLF1, F1PJ74, J9NVE9
GO:0044422	organelle part	C	6	94	13.9535	13.6035	1	1	OVER	J9NU17, E2RL75, F1Q0N9, J9P5Z0, J9P992, Q0QEN2
GO:0034654	nucleobase-containing compound biosynthetic process	P	2	35	4.65116	5.06512	1	1	UNDER	J9NVE9, Q0QEN2
GO:0016070	RNA metabolic process	P	2	40	4.65116	5.78871	1	1	UNDER	E2RL75, J9NVE9
GO:0009893	positive regulation of metabolic process	P	2	32	4.65116	4.63097	1	1	UNDER	F1PJ74, J9NVE9
GO:0042221	response to chemical	P	3	49	6.97674	7.09117	1	1	UNDER	F1PDY8, J9NVE9, F1PGC3
GO:0051128	regulation of cellular component organization	P	1	27	2.32558	3.90738	1	1	UNDER	F1PJ74
GO:0010646	regulation of cell communication	P	1	27	2.32558	3.90738	1	1	UNDER	J9NVE9
GO:0023051	regulation of signaling	P	1	27	2.32558	3.90738	1	1	UNDER	J9NVE9
GO:0098772	molecular function regulator	F	2	41	4.65116	5.93343	1	1	UNDER	J9NS29, J9PBN6
GO:0048731	system development	P	3	56	6.97674	8.1042	1	1	UNDER	E2R5H4, E2RLF1, F1PJ74
GO:0031012	extracellular matrix	C	1	28	2.32558	4.0521	1	1	UNDER	F1P6H7
GO:0004872	receptor activity	F	1	28	2.32558	4.0521	1	1	UNDER	E2R7A3
GO:0006355	regulation of transcription, DNA-templated	P	1	28	2.32558	4.0521	1	1	UNDER	J9NVE9
GO:0010033	response to organic substance	P	1	28	2.32558	4.0521	1	1	UNDER	F1PGC3
GO:1903506	regulation of nucleic acid-templated transcription	P	1	28	2.32558	4.0521	1	1	UNDER	J9NVE9
GO:0090304	nucleic acid metabolic process	P	2	44	4.65116	6.36758	1	1	UNDER	E2RL75, J9NVE9
GO:0044711	single-organism biosynthetic process	P	2	34	4.65116	4.92041	1	1	UNDER	F1PJ74, Q0QEN2
GO:0010556	regulation of macromolecule biosynthetic process	P	2	34	4.65116	4.92041	1	1	UNDER	F6Y5M8, J9NVE9
GO:0048856	anatomical structure development	P	4	74	9.30233	10.7091	1	1	UNDER	F1P6H7, E2R5H4, E2RLF1, F1PJ74
GO:0030234	enzyme regulator activity	F	2	36	4.65116	5.20984	1	1	UNDER	J9NS29, J9PBN6
GO:0072593	reactive oxygen species metabolic process	P	0	7	0	1.01302	1	1	OVER
GO:0071495	cellular response to endogenous stimulus	P	0	7	0	1.01302	1	1	OVER
GO:0045861	negative regulation of proteolysis	P	0	7	0	1.01302	1	1	OVER
GO:0051258	protein polymerization	P	0	7	0	1.01302	1	1	OVER
GO:0032102	negative regulation of response to external stimulus	P	0	7	0	1.01302	1	1	OVER
GO:0043623	cellular protein complex assembly	P	0	7	0	1.01302	1	1	OVER
GO:0004930	G-protein coupled receptor activity	F	0	7	0	1.01302	1	1	OVER
GO:0006470	protein dephosphorylation	P	0	7	0	1.01302	1	1	OVER
GO:0016209	antioxidant activity	F	0	7	0	1.01302	1	1	OVER
GO:0046873	metal ion transmembrane transporter activity	F	0	7	0	1.01302	1	1	OVER
GO:0016829	lyase activity	F	0	7	0	1.01302	1	1	OVER
GO:0009072	aromatic amino acid family metabolic process	P	0	7	0	1.01302	1	1	OVER
GO:0009069	serine family amino acid metabolic process	P	0	7	0	1.01302	1	1	OVER
GO:0005912	adherens junction	C	0	7	0	1.01302	1	1	OVER
GO:0001558	regulation of cell growth	P	0	7	0	1.01302	1	1	OVER
GO:0051726	regulation of cell cycle	P	0	7	0	1.01302	1	1	OVER
GO:0009617	response to bacterium	P	0	7	0	1.01302	1	1	OVER
GO:0070161	anchoring junction	C	0	7	0	1.01302	1	1	OVER
GO:0005874	microtubule	C	0	7	0	1.01302	1	1	OVER
GO:0060326	cell chemotaxis	P	0	7	0	1.01302	1	1	OVER
GO:0016049	cell growth	P	0	7	0	1.01302	1	1	OVER
GO:0010720	positive regulation of cell development	P	0	7	0	1.01302	1	1	OVER
GO:0000904	cell morphogenesis involved in differentiation	P	0	7	0	1.01302	1	1	OVER
GO:0042254	ribosome biogenesis	P	0	7	0	1.01302	1	1	OVER
GO:1903047	mitotic cell cycle process	P	0	7	0	1.01302	1	1	OVER
GO:1903035	negative regulation of response to wounding	P	0	7	0	1.01302	1	1	OVER
GO:0005768	endosome	C	0	7	0	1.01302	1	1	OVER
GO:0034622	cellular macromolecular complex assembly	P	0	7	0	1.01302	1	1	OVER
GO:0005730	nucleolus	C	0	7	0	1.01302	1	1	OVER
GO:0040008	regulation of growth	P	0	7	0	1.01302	1	1	OVER
GO:0000278	mitotic cell cycle	P	0	7	0	1.01302	1	1	OVER
GO:0030246	carbohydrate binding	F	0	7	0	1.01302	1	1	OVER
GO:1902580	single-organism cellular localization	P	0	7	0	1.01302	1	1	OVER
GO:0030203	glycosaminoglycan metabolic process	P	0	7	0	1.01302	1	1	OVER
GO:0022613	ribonucleoprotein complex biogenesis	P	0	7	0	1.01302	1	1	OVER
GO:0007267	cell-cell signaling	P	0	7	0	1.01302	1	1	OVER
GO:0019899	enzyme binding	F	0	7	0	1.01302	1	1	OVER
GO:0045454	cell redox homeostasis	P	0	7	0	1.01302	1	1	OVER
GO:0006355	regulation of transcription, DNA-templated	P	0	7	0	1.01302	1	1	OVER
GO:0006022	aminoglycan metabolic process	P	0	7	0	1.01302	1	1	OVER
GO:0098802	plasma membrane receptor complex	C	0	7	0	1.01302	1	1	OVER
GO:0006644	phospholipid metabolic process	P	0	7	0	1.01302	1	1	OVER
GO:0045935	positive regulation of nucleobase-containing compound metabolic process	P	0	7	0	1.01302	1	1	OVER
GO:0050819	negative regulation of coagulation	P	0	7	0	1.01302	1	1	OVER
GO:0009887	organ morphogenesis	P	0	7	0	1.01302	1	1	OVER
GO:0043086	negative regulation of catalytic activity	P	0	7	0	1.01302	1	1	OVER
GO:0043085	positive regulation of catalytic activity	P	0	7	0	1.01302	1	1	OVER
GO:0048514	blood vessel morphogenesis	P	0	7	0	1.01302	1	1	OVER
GO:0016311	dephosphorylation	P	0	7	0	1.01302	1	1	OVER
GO:0044106	cellular amine metabolic process	P	0	7	0	1.01302	1	1	OVER
GO:0005623	cell	C	20	310	46.5116	44.8625	1	1	OVER	C4MW55, J9PB81, F1PDY8, P60529, J9NU17, J9JHF7, P60524, E2RL75, F1Q0N9, F1PYZ1, F1PB77, E2RLF1, J9P5Z0, F1PJ74, E2R4H4, J9P992, F1PIF2, P00011, E2QW34, Q0QEN2
GO:0006725	cellular aromatic compound metabolic process	P	5	77	11.6279	11.1433	1	1	OVER	C4MW55, E2RL75, J9NVE9, P00011, Q0QEN2
GO:2001141	regulation of RNA biosynthetic process	P	1	29	2.32558	4.19682	1	1	UNDER	J9NVE9
GO:0043933	macromolecular complex subunit organization	P	1	29	2.32558	4.19682	1	1	UNDER	F1PJ74
GO:0065009	regulation of molecular function	P	1	29	2.32558	4.19682	1	1	UNDER	F1PJ74
GO:0016491	oxidoreductase activity	F	1	29	2.32558	4.19682	1	1	UNDER	C4MW55
GO:0044446	intracellular organelle part	C	6	92	13.9535	13.314	1	1	OVER	J9NU17, E2RL75, F1Q0N9, J9P5Z0, J9P992, Q0QEN2
GO:2000112	regulation of cellular macromolecule biosynthetic process	P	2	31	4.65116	4.48625	1	1	OVER	F6Y5M8, J9NVE9
GO:0044464	cell part	C	20	308	46.5116	44.5731	1	1	OVER	C4MW55, J9PB81, F1PDY8, P60529, J9NU17, J9JHF7, P60524, E2RL75, F1Q0N9, F1PYZ1, F1PB77, E2RLF1, J9P5Z0, F1PJ74, E2R4H4, J9P992, F1PIF2, P00011, E2QW34, Q0QEN2
GO:0051641	cellular localization	P	1	23	2.32558	3.32851	1	1	UNDER	J9NU17
GO:0005198	structural molecule activity	F	1	23	2.32558	3.32851	1	1	UNDER	F1Q0N9
GO:0035556	intracellular signal transduction	P	1	23	2.32558	3.32851	1	1	UNDER	J9NVE9
GO:0006464	cellular protein modification process	P	2	45	4.65116	6.5123	1	1	UNDER	E2R5H4, J9NVE9
GO:0036211	protein modification process	P	2	45	4.65116	6.5123	1	1	UNDER	E2R5H4, J9NVE9
GO:0070887	cellular response to chemical stimulus	P	1	24	2.32558	3.47323	1	1	UNDER	F1PGC3
GO:0007399	nervous system development	P	1	24	2.32558	3.47323	1	1	UNDER	F1PJ74
GO:0009966	regulation of signal transduction	P	1	24	2.32558	3.47323	1	1	UNDER	J9NVE9
GO:0001071	nucleic acid binding transcription factor activity	F	0	10	0	1.44718	1	1	UNDER
GO:0051270	regulation of cellular component movement	P	0	10	0	1.44718	1	1	UNDER
GO:0072562	blood microparticle	C	0	10	0	1.44718	1	1	UNDER
GO:1900046	regulation of hemostasis	P	0	10	0	1.44718	1	1	UNDER
GO:0044092	negative regulation of molecular function	P	0	10	0	1.44718	1	1	UNDER
GO:0098588	bounding membrane of organelle	C	0	10	0	1.44718	1	1	UNDER
GO:0003700	transcription factor activity, sequence-specific DNA binding	F	0	10	0	1.44718	1	1	UNDER
GO:0033043	regulation of organelle organization	P	0	10	0	1.44718	1	1	UNDER
GO:0031410	cytoplasmic vesicle	C	0	10	0	1.44718	1	1	UNDER
GO:0040012	regulation of locomotion	P	0	10	0	1.44718	1	1	UNDER
GO:1902582	single-organism intracellular transport	P	0	10	0	1.44718	1	1	UNDER
GO:0001944	vasculature development	P	0	10	0	1.44718	1	1	UNDER
GO:0043235	receptor complex	C	0	10	0	1.44718	1	1	UNDER
GO:0030193	regulation of blood coagulation	P	0	10	0	1.44718	1	1	UNDER
GO:0009986	cell surface	C	0	10	0	1.44718	1	1	UNDER
GO:0005578	proteinaceous extracellular matrix	C	0	10	0	1.44718	1	1	UNDER
GO:0032269	negative regulation of cellular protein metabolic process	P	0	10	0	1.44718	1	1	UNDER
GO:0030036	actin cytoskeleton organization	P	0	10	0	1.44718	1	1	UNDER
GO:0055080	cation homeostasis	P	0	10	0	1.44718	1	1	UNDER
GO:0019682	glyceraldehyde-3-phosphate metabolic process	P	0	10	0	1.44718	1	1	UNDER
GO:0098771	inorganic ion homeostasis	P	0	10	0	1.44718	1	1	UNDER
GO:0007017	microtubule-based process	P	0	10	0	1.44718	1	1	UNDER
GO:0043229	intracellular organelle	C	10	167	23.2558	24.1679	1	1	UNDER	J9PB81, J9NU17, E2RL75, F1Q0N9, E2RLF1, J9P5Z0, J9P992, F1PIF2, P00011, Q0QEN2
GO:0050790	regulation of catalytic activity	P	1	22	2.32558	3.18379	1	1	UNDER	F1PJ74
GO:0046983	protein dimerization activity	F	0	6	0	0.868307	1	1	OVER
GO:0045893	positive regulation of transcription, DNA-templated	P	0	6	0	0.868307	1	1	OVER
GO:0061045	negative regulation of wound healing	P	0	6	0	0.868307	1	1	OVER
GO:0006511	ubiquitin-dependent protein catabolic process	P	0	6	0	0.868307	1	1	OVER
GO:0051254	positive regulation of RNA metabolic process	P	0	6	0	0.868307	1	1	OVER
GO:0051248	negative regulation of protein metabolic process	P	0	11	0	1.5919	1	1	UNDER
GO:0042578	phosphoric ester hydrolase activity	F	0	11	0	1.5919	1	1	UNDER
GO:0046916	cellular transition metal ion homeostasis	P	0	6	0	0.868307	1	1	OVER
GO:0043632	modification-dependent macromolecule catabolic process	P	0	6	0	0.868307	1	1	OVER
GO:0072511	divalent inorganic cation transport	P	0	6	0	0.868307	1	1	OVER
GO:1900047	negative regulation of hemostasis	P	0	6	0	0.868307	1	1	OVER
GO:0060548	negative regulation of cell death	P	0	6	0	0.868307	1	1	OVER
GO:0008047	enzyme activator activity	F	0	6	0	0.868307	1	1	OVER
GO:0044093	positive regulation of molecular function	P	0	11	0	1.5919	1	1	UNDER
GO:0044089	positive regulation of cellular component biogenesis	P	0	6	0	0.868307	1	1	OVER
GO:0009790	embryo development	P	0	6	0	0.868307	1	1	OVER
GO:0098636	protein complex involved in cell adhesion	C	0	6	0	0.868307	1	1	OVER
GO:0004222	metalloendopeptidase activity	F	0	6	0	0.868307	1	1	OVER
GO:0004867	serine-type endopeptidase inhibitor activity	F	0	11	0	1.5919	1	1	UNDER
GO:0045095	keratin filament	C	0	6	0	0.868307	1	1	OVER
GO:0001525	angiogenesis	P	0	6	0	0.868307	1	1	OVER
GO:1901681	sulfur compound binding	F	0	6	0	0.868307	1	1	OVER
GO:0001503	ossification	P	0	6	0	0.868307	1	1	OVER
GO:0070838	divalent metal ion transport	P	0	6	0	0.868307	1	1	OVER
GO:0006366	transcription from RNA polymerase II promoter	P	0	11	0	1.5919	1	1	UNDER
GO:0006357	regulation of transcription from RNA polymerase II promoter	P	0	11	0	1.5919	1	1	UNDER
GO:0051093	negative regulation of developmental process	P	0	6	0	0.868307	1	1	OVER
GO:0016798	hydrolase activity, acting on glycosyl bonds	F	0	6	0	0.868307	1	1	OVER
GO:0051050	positive regulation of transport	P	0	6	0	0.868307	1	1	OVER
GO:0015631	tubulin binding	F	0	6	0	0.868307	1	1	OVER
GO:0042330	taxis	P	0	11	0	1.5919	1	1	UNDER
GO:0006935	chemotaxis	P	0	11	0	1.5919	1	1	UNDER
GO:0005815	microtubule organizing center	C	0	6	0	0.868307	1	1	OVER
GO:0004721	phosphoprotein phosphatase activity	F	0	6	0	0.868307	1	1	OVER
GO:0042981	regulation of apoptotic process	P	0	11	0	1.5919	1	1	UNDER
GO:1902680	positive regulation of RNA biosynthetic process	P	0	6	0	0.868307	1	1	OVER
GO:0070727	cellular macromolecule localization	P	0	11	0	1.5919	1	1	UNDER
GO:0016053	organic acid biosynthetic process	P	0	6	0	0.868307	1	1	OVER
GO:0006259	DNA metabolic process	P	0	6	0	0.868307	1	1	OVER
GO:0048858	cell projection morphogenesis	P	0	11	0	1.5919	1	1	UNDER
GO:0016684	oxidoreductase activity, acting on peroxide as acceptor	F	0	6	0	0.868307	1	1	OVER
GO:0019941	modification-dependent protein catabolic process	P	0	6	0	0.868307	1	1	OVER
GO:0006886	intracellular protein transport	P	0	6	0	0.868307	1	1	OVER
GO:0005794	Golgi apparatus	C	0	11	0	1.5919	1	1	UNDER
GO:0044432	endoplasmic reticulum part	C	0	6	0	0.868307	1	1	OVER
GO:0006879	cellular iron ion homeostasis	P	0	6	0	0.868307	1	1	OVER
GO:0005783	endoplasmic reticulum	C	0	11	0	1.5919	1	1	UNDER
GO:0044427	chromosomal part	C	0	6	0	0.868307	1	1	OVER
GO:0032446	protein modification by small protein conjugation	P	0	6	0	0.868307	1	1	OVER
GO:0006816	calcium ion transport	P	0	6	0	0.868307	1	1	OVER
GO:0034613	cellular protein localization	P	0	11	0	1.5919	1	1	UNDER
GO:0031347	regulation of defense response	P	0	6	0	0.868307	1	1	OVER
GO:0070647	protein modification by small protein conjugation or removal	P	0	6	0	0.868307	1	1	OVER
GO:0071705	nitrogen compound transport	P	0	6	0	0.868307	1	1	OVER
GO:0010638	positive regulation of organelle organization	P	0	6	0	0.868307	1	1	OVER
GO:0008305	integrin complex	C	0	6	0	0.868307	1	1	OVER
GO:0019838	growth factor binding	F	0	6	0	0.868307	1	1	OVER
GO:0016567	protein ubiquitination	P	0	6	0	0.868307	1	1	OVER
GO:0006790	sulfur compound metabolic process	P	0	11	0	1.5919	1	1	UNDER
GO:0005694	chromosome	C	0	6	0	0.868307	1	1	OVER
GO:0030195	negative regulation of blood coagulation	P	0	6	0	0.868307	1	1	OVER
GO:0051493	regulation of cytoskeleton organization	P	0	6	0	0.868307	1	1	OVER
GO:0030168	platelet activation	P	0	6	0	0.868307	1	1	OVER
GO:0030162	regulation of proteolysis	P	0	11	0	1.5919	1	1	UNDER
GO:0032990	cell part morphogenesis	P	0	11	0	1.5919	1	1	UNDER
GO:0009395	phospholipid catabolic process	P	0	6	0	0.868307	1	1	OVER
GO:0032970	regulation of actin filament-based process	P	0	6	0	0.868307	1	1	OVER
GO:0007186	G-protein coupled receptor signaling pathway	P	0	11	0	1.5919	1	1	UNDER
GO:1903508	positive regulation of nucleic acid-templated transcription	P	0	6	0	0.868307	1	1	OVER
GO:0007169	transmembrane receptor protein tyrosine kinase signaling pathway	P	0	11	0	1.5919	1	1	UNDER
GO:0007160	cell-matrix adhesion	P	0	6	0	0.868307	1	1	OVER
GO:0048646	anatomical structure formation involved in morphogenesis	P	0	11	0	1.5919	1	1	UNDER
GO:0016482	cytoplasmic transport	P	0	6	0	0.868307	1	1	OVER
GO:0050900	leukocyte migration	P	0	6	0	0.868307	1	1	OVER
GO:0090066	regulation of anatomical structure size	P	0	6	0	0.868307	1	1	OVER
GO:0005539	glycosaminoglycan binding	F	0	6	0	0.868307	1	1	OVER
GO:0015976	carbon utilization	P	0	6	0	0.868307	1	1	OVER
GO:0030029	actin filament-based process	P	0	11	0	1.5919	1	1	UNDER
GO:0001775	cell activation	P	0	11	0	1.5919	1	1	UNDER
GO:0055076	transition metal ion homeostasis	P	0	6	0	0.868307	1	1	OVER
GO:0055072	iron ion homeostasis	P	0	6	0	0.868307	1	1	OVER
GO:0046394	carboxylic acid biosynthetic process	P	0	6	0	0.868307	1	1	OVER
GO:0045298	tubulin complex	C	0	6	0	0.868307	1	1	OVER
GO:0007015	actin filament organization	P	0	6	0	0.868307	1	1	OVER
GO:0050818	regulation of coagulation	P	0	11	0	1.5919	1	1	UNDER
GO:0043067	regulation of programmed cell death	P	0	11	0	1.5919	1	1	UNDER
GO:0006576	cellular biogenic amine metabolic process	P	0	6	0	0.868307	1	1	OVER
GO:0006570	tyrosine metabolic process	P	0	6	0	0.868307	1	1	OVER
GO:0031090	organelle membrane	C	0	11	0	1.5919	1	1	UNDER
GO:0046939	nucleotide phosphorylation	P	0	14	0	2.02605	1	1	UNDER
GO:0044724	single-organism carbohydrate catabolic process	P	0	14	0	2.02605	1	1	UNDER
GO:0009185	ribonucleoside diphosphate metabolic process	P	0	14	0	2.02605	1	1	UNDER
GO:0009179	purine ribonucleoside diphosphate metabolic process	P	0	14	0	2.02605	1	1	UNDER
GO:0009135	purine nucleoside diphosphate metabolic process	P	0	14	0	2.02605	1	1	UNDER
GO:0012501	programmed cell death	P	0	14	0	2.02605	1	1	UNDER
GO:0009132	nucleoside diphosphate metabolic process	P	0	14	0	2.02605	1	1	UNDER
GO:0006461	protein complex assembly	P	0	14	0	2.02605	1	1	UNDER
GO:0070271	protein complex biogenesis	P	0	14	0	2.02605	1	1	UNDER
GO:0015630	microtubule cytoskeleton	C	0	14	0	2.02605	1	1	UNDER
GO:0006915	apoptotic process	P	0	14	0	2.02605	1	1	UNDER
GO:0046031	ADP metabolic process	P	0	14	0	2.02605	1	1	UNDER
GO:0016052	carbohydrate catabolic process	P	0	14	0	2.02605	1	1	UNDER
GO:0019319	hexose biosynthetic process	P	0	14	0	2.02605	1	1	UNDER
GO:0006165	nucleoside diphosphate phosphorylation	P	0	14	0	2.02605	1	1	UNDER
GO:0006757	ATP generation from ADP	P	0	14	0	2.02605	1	1	UNDER
GO:0006096	glycolytic process	P	0	14	0	2.02605	1	1	UNDER
GO:0006094	gluconeogenesis	P	0	14	0	2.02605	1	1	UNDER
GO:0006006	glucose metabolic process	P	0	14	0	2.02605	1	1	UNDER
GO:0030054	cell junction	C	0	14	0	2.02605	1	1	UNDER
GO:0009888	tissue development	P	0	14	0	2.02605	1	1	UNDER
GO:0050793	regulation of developmental process	P	1	25	2.32558	3.61795	1	1	UNDER	F1PJ74
GO:0006534	cysteine metabolic process	P	0	3	0	0.434153	1	1	OVER
GO:0044798	nuclear transcription factor complex	C	0	3	0	0.434153	1	1	OVER
GO:0007608	sensory perception of smell	P	0	3	0	0.434153	1	1	OVER
GO:0007606	sensory perception of chemical stimulus	P	0	3	0	0.434153	1	1	OVER
GO:0051271	negative regulation of cellular component movement	P	0	3	0	0.434153	1	1	OVER
GO:0044782	cilium organization	P	0	3	0	0.434153	1	1	OVER
GO:0045862	positive regulation of proteolysis	P	0	3	0	0.434153	1	1	OVER
GO:0051261	protein depolymerization	P	0	3	0	0.434153	1	1	OVER
GO:0044772	mitotic cell cycle phase transition	P	0	3	0	0.434153	1	1	OVER
GO:0044770	cell cycle phase transition	P	0	3	0	0.434153	1	1	OVER
GO:0051259	protein oligomerization	P	0	3	0	0.434153	1	1	OVER
GO:0051249	regulation of lymphocyte activation	P	0	3	0	0.434153	1	1	OVER
GO:0032103	positive regulation of response to external stimulus	P	0	3	0	0.434153	1	1	OVER
GO:0016942	insulin-like growth factor binding protein complex	C	0	3	0	0.434153	1	1	OVER
GO:0051223	regulation of protein transport	P	0	3	0	0.434153	1	1	OVER
GO:0004984	olfactory receptor activity	F	0	3	0	0.434153	1	1	OVER
GO:0043624	cellular protein complex disassembly	P	0	3	0	0.434153	1	1	OVER
GO:0008081	phosphoric diester hydrolase activity	F	0	3	0	0.434153	1	1	OVER
GO:1903318	negative regulation of protein maturation	P	0	3	0	0.434153	1	1	OVER
GO:1903317	regulation of protein maturation	P	0	3	0	0.434153	1	1	OVER
GO:0060560	developmental growth involved in morphogenesis	P	0	3	0	0.434153	1	1	OVER
GO:1901136	carbohydrate derivative catabolic process	P	0	3	0	0.434153	1	1	OVER
GO:1900048	positive regulation of hemostasis	P	0	3	0	0.434153	1	1	OVER
GO:0008064	regulation of actin polymerization or depolymerization	P	0	3	0	0.434153	1	1	OVER
GO:0050792	regulation of viral process	P	0	3	0	0.434153	1	1	OVER
GO:0001667	ameboidal-type cell migration	P	0	3	0	0.434153	1	1	OVER
GO:0001649	osteoblast differentiation	P	0	3	0	0.434153	1	1	OVER
GO:0009112	nucleobase metabolic process	P	0	3	0	0.434153	1	1	OVER
GO:0045185	maintenance of protein location	P	0	3	0	0.434153	1	1	OVER
GO:0010976	positive regulation of neuron projection development	P	0	3	0	0.434153	1	1	OVER
GO:0010955	negative regulation of protein processing	P	0	3	0	0.434153	1	1	OVER
GO:0036454	growth factor complex	C	0	3	0	0.434153	1	1	OVER
GO:0010927	cellular component assembly involved in morphogenesis	P	0	3	0	0.434153	1	1	OVER
GO:0006457	protein folding	P	0	3	0	0.434153	1	1	OVER
GO:0045785	positive regulation of cell adhesion	P	0	3	0	0.434153	1	1	OVER
GO:0071396	cellular response to lipid	P	0	3	0	0.434153	1	1	OVER
GO:0016866	intramolecular transferase activity	F	0	3	0	0.434153	1	1	OVER
GO:0016861	intramolecular oxidoreductase activity, interconverting aldoses and ketoses	F	0	3	0	0.434153	1	1	OVER
GO:0016860	intramolecular oxidoreductase activity	F	0	3	0	0.434153	1	1	OVER
GO:0043567	regulation of insulin-like growth factor receptor signaling pathway	P	0	3	0	0.434153	1	1	OVER
GO:0043566	structure-specific DNA binding	F	0	3	0	0.434153	1	1	OVER
GO:0045732	positive regulation of protein catabolic process	P	0	3	0	0.434153	1	1	OVER
GO:0060491	regulation of cell projection assembly	P	0	3	0	0.434153	1	1	OVER
GO:0042439	ethanolamine-containing compound metabolic process	P	0	3	0	0.434153	1	1	OVER
GO:0042430	indole-containing compound metabolic process	P	0	3	0	0.434153	1	1	OVER
GO:0015711	organic anion transport	P	0	3	0	0.434153	1	1	OVER
GO:0002683	negative regulation of immune system process	P	0	3	0	0.434153	1	1	OVER
GO:0009064	glutamine family amino acid metabolic process	P	0	3	0	0.434153	1	1	OVER
GO:0009063	cellular amino acid catabolic process	P	0	3	0	0.434153	1	1	OVER
GO:1902115	regulation of organelle assembly	P	0	3	0	0.434153	1	1	OVER
GO:0070201	regulation of establishment of protein localization	P	0	3	0	0.434153	1	1	OVER
GO:0010243	response to organonitrogen compound	P	0	3	0	0.434153	1	1	OVER
GO:0005929	cilium	C	0	3	0	0.434153	1	1	OVER
GO:1901698	response to nitrogen compound	P	0	3	0	0.434153	1	1	OVER
GO:0001523	retinoid metabolic process	P	0	3	0	0.434153	1	1	OVER
GO:0016197	endosomal transport	P	0	3	0	0.434153	1	1	OVER
GO:0001501	skeletal system development	P	0	3	0	0.434153	1	1	OVER
GO:0019439	aromatic compound catabolic process	P	0	3	0	0.434153	1	1	OVER
GO:1903827	regulation of cellular protein localization	P	0	3	0	0.434153	1	1	OVER
GO:0008543	fibroblast growth factor receptor signaling pathway	P	0	3	0	0.434153	1	1	OVER
GO:0010817	regulation of hormone levels	P	0	3	0	0.434153	1	1	OVER
GO:0010812	negative regulation of cell-substrate adhesion	P	0	3	0	0.434153	1	1	OVER
GO:0016101	diterpenoid metabolic process	P	0	3	0	0.434153	1	1	OVER
GO:0007420	brain development	P	0	3	0	0.434153	1	1	OVER
GO:0051098	regulation of binding	P	0	3	0	0.434153	1	1	OVER
GO:0034110	regulation of homotypic cell-cell adhesion	P	0	3	0	0.434153	1	1	OVER
GO:0045666	positive regulation of neuron differentiation	P	0	3	0	0.434153	1	1	OVER
GO:0051051	negative regulation of transport	P	0	3	0	0.434153	1	1	OVER
GO:0016747	transferase activity, transferring acyl groups other than amino-acyl groups	F	0	3	0	0.434153	1	1	OVER
GO:0016705	oxidoreductase activity, acting on paired donors, with incorporation or reduction of molecular oxygen	F	0	3	0	0.434153	1	1	OVER
GO:0006914	autophagy	P	0	3	0	0.434153	1	1	OVER
GO:0005819	spindle	C	0	3	0	0.434153	1	1	OVER
GO:0060322	head development	P	0	3	0	0.434153	1	1	OVER
GO:0051651	maintenance of location in cell	P	0	3	0	0.434153	1	1	OVER
GO:0004714	transmembrane receptor protein tyrosine kinase activity	F	0	3	0	0.434153	1	1	OVER
GO:0004713	protein tyrosine kinase activity	F	0	3	0	0.434153	1	1	OVER
GO:0030336	negative regulation of cell migration	P	0	3	0	0.434153	1	1	OVER
GO:0032507	maintenance of protein location in cell	P	0	3	0	0.434153	1	1	OVER
GO:0002520	immune system development	P	0	3	0	0.434153	1	1	OVER
GO:0031406	carboxylic acid binding	F	0	3	0	0.434153	1	1	OVER
GO:0042967	acyl-carrier-protein biosynthetic process	P	0	3	0	0.434153	1	1	OVER
GO:0031400	negative regulation of protein modification process	P	0	3	0	0.434153	1	1	OVER
GO:0030307	positive regulation of cell growth	P	0	3	0	0.434153	1	1	OVER
GO:0010770	positive regulation of cell morphogenesis involved in differentiation	P	0	3	0	0.434153	1	1	OVER
GO:0016055	Wnt signaling pathway	P	0	3	0	0.434153	1	1	OVER
GO:0000981	RNA polymerase II transcription factor activity, sequence-specific DNA binding	F	0	3	0	0.434153	1	1	OVER
GO:0005178	integrin binding	F	0	3	0	0.434153	1	1	OVER
GO:0007346	regulation of mitotic cell cycle	P	0	3	0	0.434153	1	1	OVER
GO:0048871	multicellular organismal homeostasis	P	0	3	0	0.434153	1	1	OVER
GO:0004064	arylesterase activity	F	0	3	0	0.434153	1	1	OVER
GO:0043394	proteoglycan binding	F	0	3	0	0.434153	1	1	OVER
GO:0046649	lymphocyte activation	P	0	3	0	0.434153	1	1	OVER
GO:0016667	oxidoreductase activity, acting on a sulfur group of donors	F	0	3	0	0.434153	1	1	OVER
GO:0044454	nuclear chromosome part	C	0	3	0	0.434153	1	1	OVER
GO:0005788	endoplasmic reticulum lumen	C	0	3	0	0.434153	1	1	OVER
GO:1903037	regulation of leukocyte cell-cell adhesion	P	0	3	0	0.434153	1	1	OVER
GO:0004674	protein serine/threonine kinase activity	F	0	3	0	0.434153	1	1	OVER
GO:0060271	cilium morphogenesis	P	0	3	0	0.434153	1	1	OVER
GO:0010038	response to metal ion	P	0	3	0	0.434153	1	1	OVER
GO:0006801	superoxide metabolic process	P	0	3	0	0.434153	1	1	OVER
GO:0031333	negative regulation of protein complex assembly	P	0	3	0	0.434153	1	1	OVER
GO:0002443	leukocyte mediated immunity	P	0	3	0	0.434153	1	1	OVER
GO:1990351	transporter complex	C	0	3	0	0.434153	1	1	OVER
GO:0071774	response to fibroblast growth factor	P	0	3	0	0.434153	1	1	OVER
GO:0002429	immune response-activating cell surface receptor signaling pathway	P	0	3	0	0.434153	1	1	OVER
GO:0097285	cell-type specific apoptotic process	P	0	3	0	0.434153	1	1	OVER
GO:0000228	nuclear chromosome	C	0	3	0	0.434153	1	1	OVER
GO:1903649	regulation of cytoplasmic transport	P	0	3	0	0.434153	1	1	OVER
GO:0070613	regulation of protein processing	P	0	3	0	0.434153	1	1	OVER
GO:0010639	negative regulation of organelle organization	P	0	3	0	0.434153	1	1	OVER
GO:0007265	Ras protein signal transduction	P	0	3	0	0.434153	1	1	OVER
GO:0005085	guanyl-nucleotide exchange factor activity	F	0	3	0	0.434153	1	1	OVER
GO:0060828	regulation of canonical Wnt signaling pathway	P	0	3	0	0.434153	1	1	OVER
GO:0030837	negative regulation of actin filament polymerization	P	0	3	0	0.434153	1	1	OVER
GO:0001948	glycoprotein binding	F	0	3	0	0.434153	1	1	OVER
GO:0030833	regulation of actin filament polymerization	P	0	3	0	0.434153	1	1	OVER
GO:0030832	regulation of actin filament length	P	0	3	0	0.434153	1	1	OVER
GO:0006144	purine nucleobase metabolic process	P	0	3	0	0.434153	1	1	OVER
GO:0016570	histone modification	P	0	3	0	0.434153	1	1	OVER
GO:0048729	tissue morphogenesis	P	0	3	0	0.434153	1	1	OVER
GO:0016569	covalent chromatin modification	P	0	3	0	0.434153	1	1	OVER
GO:0016568	chromatin modification	P	0	3	0	0.434153	1	1	OVER
GO:0019814	immunoglobulin complex	C	0	3	0	0.434153	1	1	OVER
GO:0042176	regulation of protein catabolic process	P	0	3	0	0.434153	1	1	OVER
GO:0044344	cellular response to fibroblast growth factor stimulus	P	0	3	0	0.434153	1	1	OVER
GO:0043254	regulation of protein complex assembly	P	0	3	0	0.434153	1	1	OVER
GO:0043241	protein complex disassembly	P	0	3	0	0.434153	1	1	OVER
GO:0016525	negative regulation of angiogenesis	P	0	3	0	0.434153	1	1	OVER
GO:0043236	laminin binding	F	0	3	0	0.434153	1	1	OVER
GO:1904035	regulation of epithelial cell apoptotic process	P	0	3	0	0.434153	1	1	OVER
GO:0006767	water-soluble vitamin metabolic process	P	0	3	0	0.434153	1	1	OVER
GO:0006766	vitamin metabolic process	P	0	3	0	0.434153	1	1	OVER
GO:1904019	epithelial cell apoptotic process	P	0	3	0	0.434153	1	1	OVER
GO:0006749	glutathione metabolic process	P	0	3	0	0.434153	1	1	OVER
GO:0030194	positive regulation of blood coagulation	P	0	3	0	0.434153	1	1	OVER
GO:0042110	T cell activation	P	0	3	0	0.434153	1	1	OVER
GO:0051495	positive regulation of cytoskeleton organization	P	0	3	0	0.434153	1	1	OVER
GO:0051494	negative regulation of cytoskeleton organization	P	0	3	0	0.434153	1	1	OVER
GO:0006721	terpenoid metabolic process	P	0	3	0	0.434153	1	1	OVER
GO:0006720	isoprenoid metabolic process	P	0	3	0	0.434153	1	1	OVER
GO:0031252	cell leading edge	C	0	3	0	0.434153	1	1	OVER
GO:0052548	regulation of endopeptidase activity	P	0	3	0	0.434153	1	1	OVER
GO:0004518	nuclease activity	F	0	3	0	0.434153	1	1	OVER
GO:0019199	transmembrane receptor protein kinase activity	F	0	3	0	0.434153	1	1	OVER
GO:1902495	transmembrane transporter complex	C	0	3	0	0.434153	1	1	OVER
GO:0031214	biomineral tissue development	P	0	3	0	0.434153	1	1	OVER
GO:0030111	regulation of Wnt signaling pathway	P	0	3	0	0.434153	1	1	OVER
GO:0097164	ammonium ion metabolic process	P	0	3	0	0.434153	1	1	OVER
GO:0000122	negative regulation of transcription from RNA polymerase II promoter	P	0	3	0	0.434153	1	1	OVER
GO:0032984	macromolecular complex disassembly	P	0	3	0	0.434153	1	1	OVER
GO:1901343	negative regulation of vasculature development	P	0	3	0	0.434153	1	1	OVER
GO:0008285	negative regulation of cell proliferation	P	0	3	0	0.434153	1	1	OVER
GO:0001894	tissue homeostasis	P	0	3	0	0.434153	1	1	OVER
GO:0048009	insulin-like growth factor receptor signaling pathway	P	0	3	0	0.434153	1	1	OVER
GO:0007187	G-protein coupled receptor signaling pathway, coupled to cyclic nucleotide second messenger	P	0	3	0	0.434153	1	1	OVER
GO:0007178	transmembrane receptor protein serine/threonine kinase signaling pathway	P	0	3	0	0.434153	1	1	OVER
GO:0000785	chromatin	C	0	3	0	0.434153	1	1	OVER
GO:0007162	negative regulation of cell adhesion	P	0	3	0	0.434153	1	1	OVER
GO:0007159	leukocyte cell-cell adhesion	P	0	3	0	0.434153	1	1	OVER
GO:0008235	metalloexopeptidase activity	F	0	3	0	0.434153	1	1	OVER
GO:0050953	sensory perception of light stimulus	P	0	3	0	0.434153	1	1	OVER
GO:0006024	glycosaminoglycan biosynthetic process	P	0	3	0	0.434153	1	1	OVER
GO:0006023	aminoglycan biosynthetic process	P	0	3	0	0.434153	1	1	OVER
GO:0046470	phosphatidylcholine metabolic process	P	0	3	0	0.434153	1	1	OVER
GO:0019751	polyol metabolic process	P	0	3	0	0.434153	1	1	OVER
GO:0006012	galactose metabolic process	P	0	3	0	0.434153	1	1	OVER
GO:0048639	positive regulation of developmental growth	P	0	3	0	0.434153	1	1	OVER
GO:0048638	regulation of developmental growth	P	0	3	0	0.434153	1	1	OVER
GO:0044272	sulfur compound biosynthetic process	P	0	3	0	0.434153	1	1	OVER
GO:0043177	organic acid binding	F	0	3	0	0.434153	1	1	OVER
GO:0060090	binding, bridging	F	0	3	0	0.434153	1	1	OVER
GO:0006650	glycerophospholipid metabolic process	P	0	3	0	0.434153	1	1	OVER
GO:0032272	negative regulation of protein polymerization	P	0	3	0	0.434153	1	1	OVER
GO:0032271	regulation of protein polymerization	P	0	3	0	0.434153	1	1	OVER
GO:0060070	canonical Wnt signaling pathway	P	0	3	0	0.434153	1	1	OVER
GO:0030097	hemopoiesis	P	0	3	0	0.434153	1	1	OVER
GO:0004459	L-lactate dehydrogenase activity	F	0	3	0	0.434153	1	1	OVER
GO:0004457	lactate dehydrogenase activity	F	0	3	0	0.434153	1	1	OVER
GO:0071593	lymphocyte aggregation	P	0	3	0	0.434153	1	1	OVER
GO:0002250	adaptive immune response	P	0	3	0	0.434153	1	1	OVER
GO:0030042	actin filament depolymerization	P	0	3	0	0.434153	1	1	OVER
GO:0002237	response to molecule of bacterial origin	P	0	3	0	0.434153	1	1	OVER
GO:0070489	T cell aggregation	P	0	3	0	0.434153	1	1	OVER
GO:0070486	leukocyte aggregation	P	0	3	0	0.434153	1	1	OVER
GO:0051347	positive regulation of transferase activity	P	0	3	0	0.434153	1	1	OVER
GO:0051345	positive regulation of hydrolase activity	P	0	3	0	0.434153	1	1	OVER
GO:1990138	neuron projection extension	P	0	3	0	0.434153	1	1	OVER
GO:0045927	positive regulation of growth	P	0	3	0	0.434153	1	1	OVER
GO:0019058	viral life cycle	P	0	3	0	0.434153	1	1	OVER
GO:0051301	cell division	P	0	3	0	0.434153	1	1	OVER
GO:0008199	ferric iron binding	F	0	3	0	0.434153	1	1	OVER
GO:0008194	UDP-glycosyltransferase activity	F	0	3	0	0.434153	1	1	OVER
GO:0030674	protein binding, bridging	F	0	3	0	0.434153	1	1	OVER
GO:0048588	developmental cell growth	P	0	3	0	0.434153	1	1	OVER
GO:0050863	regulation of T cell activation	P	0	3	0	0.434153	1	1	OVER
GO:0007018	microtubule-based movement	P	0	3	0	0.434153	1	1	OVER
GO:0051918	negative regulation of fibrinolysis	P	0	3	0	0.434153	1	1	OVER
GO:0050820	positive regulation of coagulation	P	0	3	0	0.434153	1	1	OVER
GO:0009897	external side of plasma membrane	C	0	3	0	0.434153	1	1	OVER
GO:0048534	hematopoietic or lymphoid organ development	P	0	3	0	0.434153	1	1	OVER
GO:2000181	negative regulation of blood vessel morphogenesis	P	0	3	0	0.434153	1	1	OVER
GO:0006586	indolalkylamine metabolic process	P	0	3	0	0.434153	1	1	OVER
GO:2000146	negative regulation of cell motility	P	0	3	0	0.434153	1	1	OVER
GO:0006568	tryptophan metabolic process	P	0	3	0	0.434153	1	1	OVER
GO:0061061	muscle structure development	P	0	3	0	0.434153	1	1	OVER
GO:0044087	regulation of cellular component biogenesis	P	0	9	0	1.30246	1	1	UNDER
GO:0098602	single organism cell adhesion	P	0	9	0	1.30246	1	1	UNDER
GO:0009725	response to hormone	P	0	9	0	1.30246	1	1	UNDER
GO:0051173	positive regulation of nitrogen compound metabolic process	P	0	9	0	1.30246	1	1	UNDER
GO:0051156	glucose 6-phosphate metabolic process	P	0	9	0	1.30246	1	1	UNDER
GO:0016853	isomerase activity	F	0	9	0	1.30246	1	1	UNDER
GO:0045087	innate immune response	P	0	9	0	1.30246	1	1	UNDER
GO:0030334	regulation of cell migration	P	0	9	0	1.30246	1	1	UNDER
GO:0016023	cytoplasmic membrane-bounded vesicle	C	0	9	0	1.30246	1	1	UNDER
GO:0045597	positive regulation of cell differentiation	P	0	9	0	1.30246	1	1	UNDER
GO:0006875	cellular metal ion homeostasis	P	0	9	0	1.30246	1	1	UNDER
GO:0006873	cellular ion homeostasis	P	0	9	0	1.30246	1	1	UNDER
GO:0010628	positive regulation of gene expression	P	0	9	0	1.30246	1	1	UNDER
GO:0030198	extracellular matrix organization	P	0	9	0	1.30246	1	1	UNDER
GO:0006739	NADP metabolic process	P	0	9	0	1.30246	1	1	UNDER
GO:0006098	pentose-phosphate shunt	P	0	9	0	1.30246	1	1	UNDER
GO:0030003	cellular cation homeostasis	P	0	9	0	1.30246	1	1	UNDER
GO:0055082	cellular chemical homeostasis	P	0	9	0	1.30246	1	1	UNDER
GO:0055065	metal ion homeostasis	P	0	9	0	1.30246	1	1	UNDER
GO:0009891	positive regulation of biosynthetic process	P	0	9	0	1.30246	1	1	UNDER
GO:0043062	extracellular structure organization	P	0	9	0	1.30246	1	1	UNDER
GO:2000145	regulation of cell motility	P	0	9	0	1.30246	1	1	UNDER
